# Supplementary material
Source: PubMed Central journal article supplement (PMC7321986)
Supplement: pnas.2003505117.sapp.pdf [file pnas.2003505117.sapp.pdf]

## SI Appendix

Homoeologous exchanges occur through intragenic recombination generating novel transcripts and proteins in wheat and other polyploids

Zhibin Zhang, Xiaowan Gou, Hongwei Xun, Yao Bian, Xintong Ma, Juzuo Li, Ning Li, Lei Gong, Moshe Feldman, Bao Liu\* and Avraham A. Levy\*

\*Corresponding authors: e-mail: [baoliu@nenu.edu.cn](mailto:baoliu@nenu.edu.cn) (BL), [avi.levy@weizmann.ac.il](mailto:avi.levy@weizmann.ac.il) (AL)

This PDF file includes:

SI Materials and Methods

Figs. S1 to S18

Tables S1 to S9

## SI Materials and Methods

**Plant materials, library construction and sequencing.** The tetraploid wheat (DD) was produced by intergeneric hybridization between *T. urartu* (AA) and *A. tauschii* (DD) followed by colchicine-mediated genome doubling (1). A single S2 euploid individual seed was used as the founder to construct the tetraploid wheat population up to S12 (2). A total of 11 AADD individuals, including six euploid plants from S6, S9 and S12 generations and 5 compensated aneuploid plants with large-scale homoeologous exchanges (HEs) from S9 generation, were sampled and used in this study (Fig. S1). The 11 individual plants were karyotyped based on fluorescence *in situ* hybridization (FISH) and genomic *in situ* hybridization (GISH). All AADD plants and corresponding diploid parents (AA and DD) were grown in a glasshouse under normal conditions (25/20°C, 16/8 h, day/night). Young leaves collected from the trefoil stage plants were immediately frozen in liquid nitrogen. Genomic DNA was extracted by the CTAB methods. Total RNA was isolated using Trizol (Invitrogen) based on standard protocol. Library construction was carried out with standard protocols (Illumina, San Diego, CA, USA) for both DNA and RNA samples. Cluster generation and sequencing were performed on Illumina 2500 system with pair-end 150-bp read length. Clean data have been deposited in the SRA database (<http://www.ncbi.nlm.nih.gov/sra/>) with accession number PRJNA608801.

**Publicly available data of other allopolyploid species used in this study.** All publicly available sequencing data used in this study were downloaded from National Center for Biotechnology Information (NCBI) Sequence Read Archive collection (SRA). For diploid wheat progenitor, *Aegilops tauschii*, DNA methylation sequencing data by targeted capture (chromosome 3DL, ERR3149846, ERR3149847 and ERR3149848) and ATAC-seq data (ERR2927671, ERR2927672 and ERR2927673) were obtained.

For Brassica, whole-genomic re-sequencing data from *B. oleracea* (SRR3202040), *B. rapa* (SRR3203680) and 7 *B. napus* accessions (SRR1266094, SRR1266095, SRR1266021, ERR475359, ERR475361, ERR457868, ERR457756, ERR457816 and ERR457887) and RNA-seq data from *B. oleracea* (SRR8633040) and *B. rapa* (SRR8633039) and 2 *B. napus* accessions “Darmor-bsh” and “Yudal” (PRJNA362706), were obtained.

For banana, whole-genomic re-sequencing data from *M. balbisiana* (SRR6996488), *B. rapa* (SRR6996492) and 3 *Musa* triploid accession including “Pelipita” (SRR6996486, ABB), “FenJiao” (SRR6996487, AAB) and “Kamaramasenge” (SRR6996494, AAB) and RNA-seq data from *M. balbisiana* (SRR7006127), *M. acuminata* (SRR7006128) and “FenJiao” (SRR7006136), were also obtained.

For Arabidopsis, whole-genomic re-sequencing data from *A. arenosa* (SRR2040811) 15 *A. suecica* accessions (SRR3123759, SRR3123760, SRR3123761, SRR3123762, SRR3123763, SRR3123764, SRR3123765, SRR3123766, SRR3123767, SRR3123768,



SRR3123769, SRR3123770, SRR2084154, SRR2084157, SRR2084158), were also obtained.

For rice, whole-genomic re-sequencing data and RNA-seq data from diploid parents (Nipponbare and 9311), diploid hybrids (N9 and 9N) and four segmental tetraploids, were download from SRA database with accession no. PRJNA514100.

For peanut (*Arachis hypogaea*), SNP information between A and B sub-genomes from 39 different varieties or accessions were downloaded from PeanutBase ([https://peanutbase.org/data/public/Arachis\\_hypogaea/Tifrunner.esm.TVDM/](https://peanutbase.org/data/public/Arachis_hypogaea/Tifrunner.esm.TVDM/)).

**Genome resequencing reads alignment and HE detection in synthetic tetraploid wheat (AADD).** A total of 1.46 Tb (~17x per AADD sample) re-sequencing data was generated. Before reads alignment, an *in silico* tetraploid control dataset was constructed by mixing the diploid parental whole-genome sequencing data based on the ratio of the reference genomes size between A (*Triticum urartu*) and D (*Aegilops tauchii*). After removing low-quality reads (reads with Phred quality less than 10) using Trimmomatic (Bolger, et al. 2014), sequencing reads from both real and *in silico* tetraploid individuals were aligned to the combined AADD reference genome (merging the *T. urartu* and *Ae. tauchii* reference genomes (3, 4)) by Minimap2 (5) with default parameters. Considering that more than 85% genomic regions of AADD genome were TE-related regions, only uniquely mapped reads were retained for identification of HE events. PicardTools (v2.18.26) were used for sorting data, marking PCR duplication and adding RQ tags. Indel realignment was performed by GATK3 (<https://software.broadinstitute.org/gatk/>).

HE junctions were detected for each individual as follows. First, candidate HE junctions were detected by calculating the average depth of each 100 kb window at whole-genome level. Read depths were normalized by the whole-genome averaged depth. A slide-interval approach with 50 intervals (20 kb) with step-size of one interval was used to judge the depth difference between real and *in silico* individuals by Student's t-test. Intervals associated with significant difference of depth (p-value < 0.05) were flagged as "diff", the remaining intervals were flagged as "same". Intervals with identical flag were merged together and the joint of interval with different flag were treated as candidate HE junctions. Then, CNVkit (v0.9.6) (6) was performed to compare the copy number between *in silico* and real tetraploid individuals by scanning the candidate HE regions with 1kb-window size to shrink the HE junction size. Finally, each candidate HE junction was manually checked to confirm the exact joint. For HE junctions which were located in low reads-mappable region or when it was difficult to measure the exact location, HEs closest flanking regions that possessed different copy numbers were considered as the border of HE junctions.

For Brassica and banana, above method was used to identify original HE junctions.

**Validation of HE junction based on SNPs-based methods.** To validate HE junctions located in D genome of the AADD wheat tetraploid, first, re-sequencing reads from diploid A.

*tauschii* were aligned to D reference genome by Minimap2 with default parameter. PicardTools (v2.18.26) was used for sorting data, marking PCR duplication and adding RQ tags. Indel realignment was performed by GATK3 (<https://software.broadinstitute.org/gatk/>). SNP calling was performed by BCFtools. Only SNPs with mapping quality > 30, base quality >30, depth > 4 and the genotype equal to "1/1" were retained to generate the SNP list marked as "list 1", which indicated the inherent difference between our D genome and reference D genome. Second, sequencing reads from diploid *T. urartu* were aligned to D reference genome and performed SNP calling. This list was marked as "list 2", indicating the difference between our A genome and reference D genome. We removed SNPs occurring in "list 2" which also belonged to "list1", to generate a SNPs list, "list 3", which represented the difference between our DD and AA diploids. Then, sequencing reads from the *in silico* mix tetraploid were aligned to D reference genome and SAMtools mpileup was performed to assign the A-derived and D-derived reads based on list 3. In list 3, the SNP sites were kept if both A-derived and D-derived read depth > 4 and both A- and D-allele frequency belonged to the interval of [0.1, 0.9]. The filtered SNP list was marked as "list 4", representing the high-confident differences between our DD and AA diploids, including 5,870,921 SNP sites. Finally, sequencing reads from tetraploid individuals were aligned to D reference genome and samtools mpileup was performed to assign the A-derived and D-derived reads based on list 4. For each SNP site: (i) if all reads derived from A allele and the depth > 4, this site was flagged as "A-derived"; (ii) if all reads derived from D allele and the depth > 4, this site was flagged as "D-derived" and (iii) if the depth of both allele >4, this site was flagged as "heterozygous". Customized Python script was used to merge SNPs with same flag to generate different types of intervals (including AA-derive, DD-derived and heterozygous intervals, respectively). The junction between two adjacent intervals with different type was defined as HE junction. To avoid false positive derived from small interval and sequence elimination, HE junction that satisfied the following three conditions were retained: (1) The intervals on both sides of HE junction were large than 100kb; (2) The intervals on both sides of HE junction included at least 100 SNP sites and (3) the average sequencing depth of SNP sites in HE junction-related AA- and/or DD-derived intervals were larger than 1.5 fold of that in AA and/or DD subgenomes at whole genome level.

For Brassica, first, re-sequencing reads from diploid *B. oleracea* were aligned to *B. oleracea* (CC) reference genome to call SNP "list 1". Second, sequencing reads from diploid *B. rapa* (AA) were aligned to CC reference genome and performed call SNP "list 2". SNPs occurred in "list 2" that also belonged to "list1" were removed to generate SNPs "list 3". Then, sequencing reads from *B. napus* "Farmor-bzh" were aligned to CC reference genome and SAMtools mpileup was performed to assign the A-derived and C-derived reads based on SNP "list 3". Similar filtering criteria as for wheat were used to identify high-confident SNP "list 4" between AA and CC diploids (also between A and D subgenomes in *B. napus*). In total, we identified 2,063,999 SNP sites belonging to "list 4". Finally, sequencing reads from *B. napus* of different

accessions (including “H165”, “Bristol”, “Aburamasari”, “Aviso”, “Yudal” and “Kale”) were aligned to CC reference genome and samtools mpileup was performed to assign the A-derived and C-derived reads based on list 4. Similar filtering criteria with wheat were used to flag SNP sites in “list 4” and customized Python script was performed to identify HE junctions.

For banana, first, re-sequencing reads from diploid *M. balbisiana* was aligned to *M. balbisiana* (BB) reference genome to call SNP “list 1”. Second, sequencing reads from diploid *M. acuminata* (AA) were aligned to BB reference genome and performed call SNP “list 2”. SNPs occurred in “list 2” that also belonged to “list1” were removed to generate SNPs “list 3”. In total, we identified 1,513,073 SNP sites belonging to “list 3”. Finally, sequencing reads from 3 triploid accessions were aligned to BB reference genome and samtools mpileup was performed to assign the A-derived and B-derived reads based on list 3. Similar filtering criteria with wheat were used to flag SNP sites in “list 3” and customized Python script was performed to identify HE junctions.

For Arabidopsis, first, re-sequencing reads from diploid *A. arenose* was aligned to *A. thaliana* reference genome to call SNP “list 1” (homozygous SNP). Then re-sequencing reads from tetraploid *A. suecica* including SRR2084154, SRR2084158 and SRR3123766 was aligned to *A. thaliana* reference genome. SNPs with mapping quality > 30, base quality >30, depth > 8 and the genotype equal to “0/1” were retained to generate the SNP list marked as “list 2”, “list 3” and “list 4” (heterozygous SNP). SNP shared among all the four lists were generated to the final SNP site in “list 5”. In total, we identified 271,627 SNP sites belonging to “list 5”. Finally, sequencing reads from the remaining 12 *A. suecica* accessions were aligned to *A. thaliana* reference genome and identified HE junctions based on SNP “list 5”. For Arabidopsis, the intervals on both sides of HE junction were large than 50kb.

For rice, the method described previously (7) were used to call SNP list between cv. Nipponbare (*japonica* rice) and cv. 9311 (*indica* rice). In total, 1,457,488 SNP sites between Nipponbare and 9311 were used for HE junction calling in synthetic rice tetraploid individuals.

For peanut (*Arachis hypogaea*), 825,960 SNP sites between A and B sub-genomes from 39 different varieties or accessions (8) were used to identify HE junctions.

For each species, the Bam files of each HE junction and 100 kb flanking region were deposited in the SRA database (<http://www.ncbi.nlm.nih.gov/sra/>) with accession number PRJNA625880.

**Judgement of chromosome rearrangement flanking HE junctions based on comparative genomic analysis in the synthetic tetraploid wheat (AADD).** Chromosome rearrangement flanking HE junctions occurred in A sub-genome. To estimate if the rearrangements were attributed to HE or mis-assembly of A reference genome, chromosome sequences related to rearrangement flanking HE junctions in A genome were extracted and aligned to reference genomes of A sub-genome of wild emmer wheat (*T. turgidum* ssp. *dicoccoides*) and durum wheat (*T. turgidum* ssp. *durum*) and to D reference genome (*A.*

*tauchii*) by Minimap2 with “asm20” parameter. Only alignment hits with length large than 1000bp and alignment score large than 10 were retained. Dot plots between A genome and A sub-genome of emmer wheat, A sub-genome of durum wheat and D genome were performed and retrieved for structural variations, respectively.

**Motif analysis.** The 37 HE junctions from D subgenome were used for motif enrichment analysis by MEME Suite with classic mode (9). The candidate motif wide was set from 12 to 22 base pair. Motifs with E-value < 10e-10 were considered as candidate motifs. Genomic locations of motif were determined by FIMO (10) with q-value < 0.05. 3 kb flanking regions of each HE site was binned to 200bp non-overlapping windows to calculate the occurrences of each motif. Similar, as control, 37 random genomic regions with same size distribution were resampled with 1000 replicates using customized Python script. Bedtools coverage (11) was used to count motifs which overlapping with different genomic regions including promoter (upstream 2kb from gene region), gene and TE. For Brassica (104 HE junctions), rice (166 HE junctions) and peanut (26 junctions), similar methods were used to search HE-enriched motif and determine their genomic locations.

**Identification of homoeologous gene pairs.** Homoeolog pairs were identified by jcv utility libraries (<https://github.com/tanghaibao/jcvi>) based on sequence similarity and genomic position of genes from homoeologous chromosomes. For wheat AADD segmental tetraploid, 13468 homoeolog pairs were identified between A and D reference genomes. For brassica, 25022 homoeolog pairs were identified between A and C reference genomes. For banana, 24497 homoeolog pairs were identified between A and B reference genomes. For rice, 24362 homoeolog pairs were identified between Nipponbare and 9311 reference genomes.

**Validation of gene fusion on transcript level.** Although not useful for validating HE sites in non-transcript genomic regions, RNA-seq data could be used for (i) testing gene fusion event on transcript level and (ii) narrowing down the resolution of HE events in transcript genomic regions (because of higher sequencing depth). Therefore, we also validated the HE interval using RNA-seq data based on the SNP list re-sequencing data. To test whether fusion transcripts occurred at the transcriptional level, Integrative genomics viewer (IGV) was performed to check if A-specific and D-specific SNP sites co-occurred in a single RNA-seq read or a single pair of RNA-seq reads (fusion-supporting reads). Furthermore, RT-PCR and Sanger sequencing were performed to obtain full-length fusion transcripts. For each fusion gene, 20 positive clones from diploid parents, control tetraploid and HE tetraploid were chosen for Sanger sequencing. MEGA7 was used for the alignment the results of Sanger sequencing. ORFfinder (<https://www.ncbi.nlm.nih.gov/orffinder/>) was used to predict the open reading frame of fusion transcripts.

For Brassica, banana and rice, above RNA-seq-based method was also used to validate gene fusion event at transcriptional level.

**DNA Methylation data and ATAC-seq data analysis.** After removing adaptor and low-quality reads, bisulphite-treated methylome reads were aligned to *A. tauschii* genome (for wheat data) or *B. oleracea* genome (for Brassica data) using Bismark software (12). Cytosine sites covered by at least 4 reads were retained further analysis. Methylation level of HE junctions and flanking regions (2Kb around) were calculated by CGmap Tools (13).

After removing adaptor and low-quality reads, ATAC-seq reads were aligned to *B. oleracea* genome using Bowtie2 (14) with 1-mismatch. Only uniquely mapped reads were retained for further analysis. Sequencing depth of HE junctions and flanking regions (2Kb around) were calculated by Bedtools (11).

1. Shaked H, Kashkush K, Ozkan H, Feldman M, & Levy AA (2001) Sequence elimination and cytosine methylation are rapid and reproducible responses of the genome to wide hybridization and allopolyploidy in wheat. *The Plant Cell* 13(8):1749-1759.
2. Gou X, *et al.* (2018) Transgenerationally precipitated meiotic chromosome instability fuels rapid karyotypic evolution and phenotypic diversity in an artificially constructed allotetraploid wheat (AADD). *Molecular biology and evolution* 35(5):1078-1091.
3. Ling HQ, Ma B, Shi X, Liu H, & Liang C (2018) Genome sequence of the progenitor of wheat A subgenome Triticum urartu. *Nature* 557(7705).
4. Luo M-C, *et al.* (2017) Genome sequence of the progenitor of the wheat D genome Aegilops tauschii. *Nature* 551(7681):498.
5. Li H (2018) Minimap2: pairwise alignment for nucleotide sequences. *Bioinformatics* 34(18):3094-3100.
6. Talevich E, Shain AH, Botton T, & Bastian BC (2016) CNVkit: genome-wide copy number detection and visualization from targeted DNA sequencing. *PLoS computational biology* 12(4):e1004873.
7. Li N, *et al.* (2019) DNA methylation repatterning accompanying hybridization, whole genome doubling and homoeolog exchange in nascent segmental rice allotetraploids. *New Phytologist*.
8. Bertoli DJ, *et al.* (2019) The genome sequence of segmental allotetraploid peanut *Arachis hypogaea*. *Nature genetics* 51(5):877.
9. Bailey TL, *et al.* (2009) MEME SUITE: tools for motif discovery and searching. *Nucleic acids research* 37(suppl\_2):W202-W208.
10. Grant CE, Bailey TL, & Noble WS (2011) FIMO: scanning for occurrences of a given motif. *Bioinformatics* 27(7):1017-1018.
11. Quinlan AR & Hall IM (2010) BEDTools: a flexible suite of utilities for comparing genomic features. *Bioinformatics* 26(6):841-842.
12. Krueger F & Andrews SR (2011) Bismark: a flexible aligner and methylation caller for Bisulfite-Seq applications. *bioinformatics* 27(11):1571-1572.
13. Guo W, *et al.* (2017) CGmapTools improves the precision of heterozygous SNV calls and supports allele-specific methylation detection and visualization in bisulfite-sequencing data. *Bioinformatics* 34(3):381-387.
14. Langmead B & Salzberg SL (2012) Fast gapped-read alignment with Bowtie 2. *Nature*

*methods* 9(4):357.

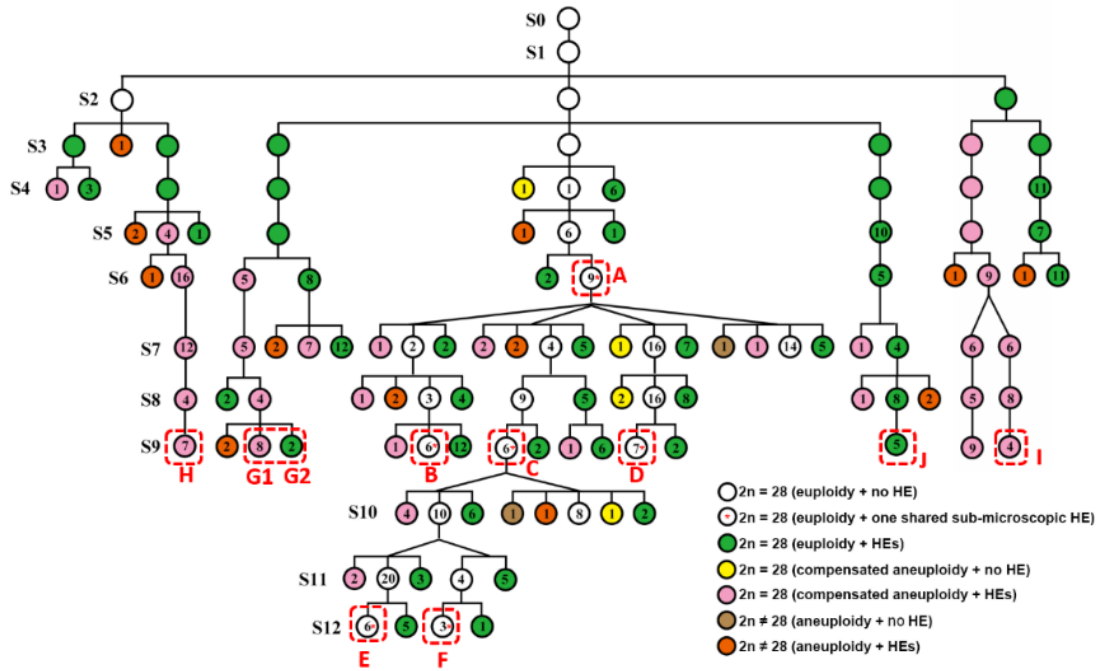

Fig. S1. Karyotypic composition of progenies of bona fide euploidy-descendants (being derived from one or more euploid parental individuals as indicated by the number of branches) in the synthetic tetraploid wheat (AADD) population from S0 to S12 generations. The seven different circles represent seven distinct karyotypic groups with numbers in the circles referring to individual numbers within a given karyotypic group. Circles within red dotted boxes denote the samples used in this study. Plants A-F (white circles with a red star) represent euploids at the cytological level, i.e., they did not contain numerical or structural variations including homoeologous exchange (HE). Sequencing of their genomes, however, showed that they all harbor a single sub-microscopic translocation between chromosomes 4A and 5D, and which most likely occurred in the S1 generation and then being vertically transmitted to, and shared by, all descendent plants. Because this translocation event occurred in regions including an ancient translocation between the long arms of chromosomes 4A and 5A in *T. urartu* (3), it was also a HE by definition. These plants (A-F), being sharing the same single sub-microscopic translocation, were thus represent ideal negative controls for the analysis of additional HEs in other plants.

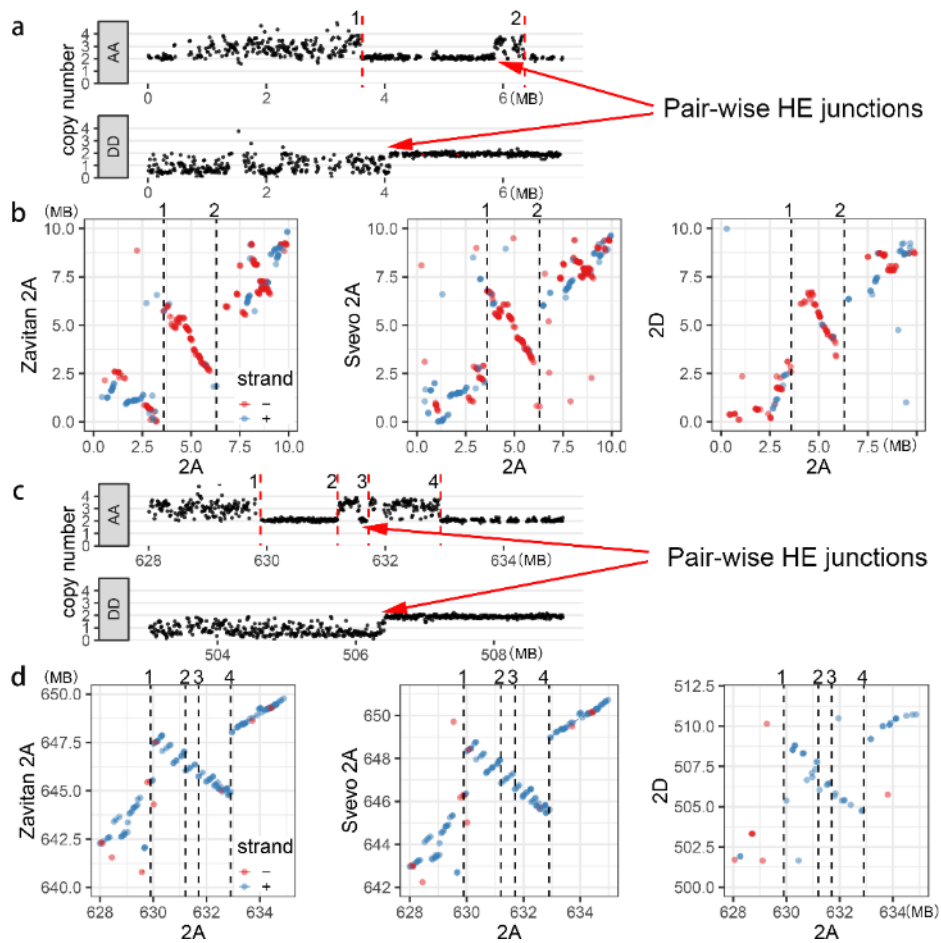

Fig. S2. Identification of HE-junction-related chromosome structural variation based on chromosome alignment among related wheat species. (a) and (c), two examples of candidate HE junction in A and D subgenomes. Regions between red dashed lines indicate the mis-ordered genomic regions (large inversion) in A subgenome. Red arrows represent confident HE junctions in both chromosomes. (b) and (d), chromosome alignment among wheat species of corresponding regions in (a) and (c). Alignments between regions of A subgenome and syntenic regions in A subgenome of cv. Zavitan (wild emmer wheat, left), in A subgenome of cv. Svevo (durum wheat, middle) and D genome from *Ae. tauschii* (right) were shown. Red and blue dots indicate alignment hits in forward and reverse orientations, respectively. The black dashed lines and corresponding digits above them are identical with which occurred in (a) and (c). In each case, if the three comparisons in shared similar sequence-rearrangement patterns, it will be inferred that the reference sequence of *T. urartu* contains specific 'structure rearrangement', which is attributed to mis-assembly other than HE-induced structural variation.



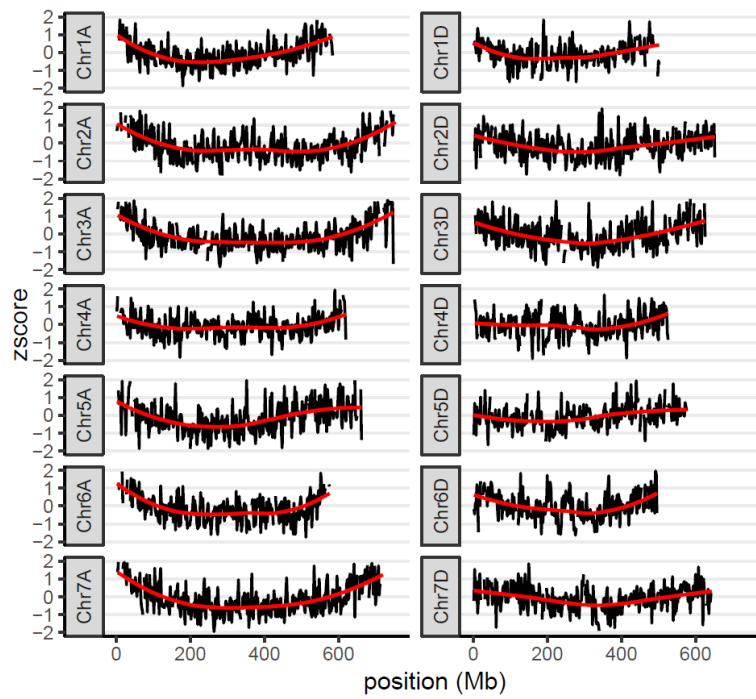

Fig. S3. Distribution of CCN motif in AADD genome. Genome was divided to 2Mb bins to count the number of CCN motif. X-axis indicates the chromosome position and y-axis indicates the Z-score transformed density of motif in each 2Mb bins. Red curves for each chromosome represent the fitting curves based on loess regression.

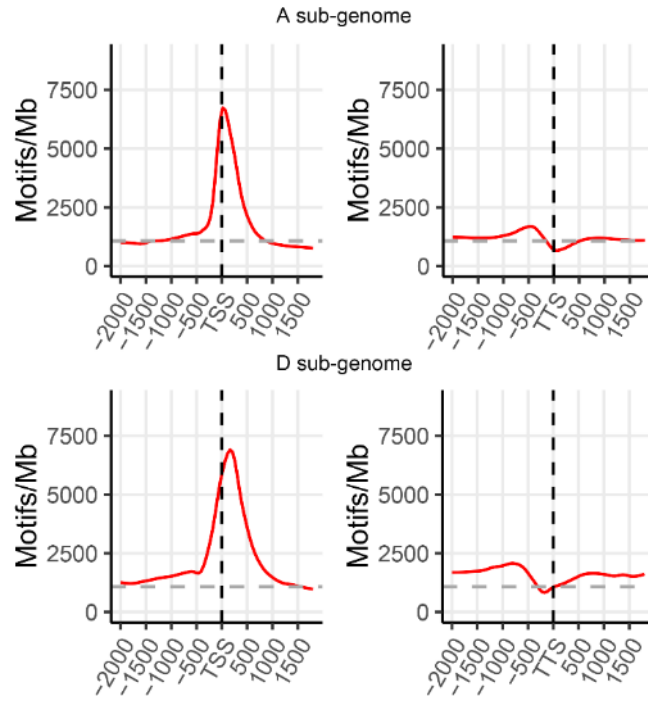

Fig. S4. Distribution of CCN motif in gene-related regions in A (a) and D (b) subgenomes. For each sub-genome, left panel represents the motif density flanking transcript start site (TSS) (2kb flanking regions), whereas right panel represents the motif density flanking transcript terminal site (TTS) (2kb flanking regions).

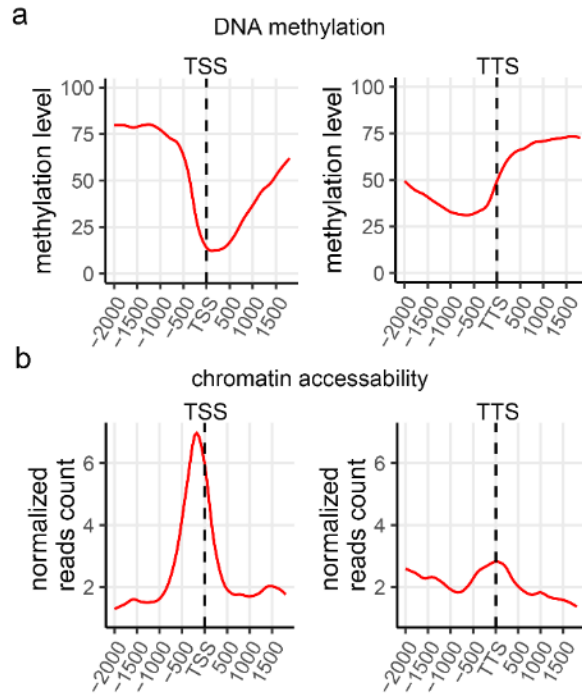

Fig. S5. Distribution of DNA methylation and chromatin accessibility in gene-related regions in *A. tauschii*. For both (a) DNA methylation and (b) chromatin accessibility, left panel represents the feature density flanking transcript start site (TSS) (2kb flanking regions), whereas right panel represents the feature density flanking transcript terminal site (TTS) (2kb flanking regions).

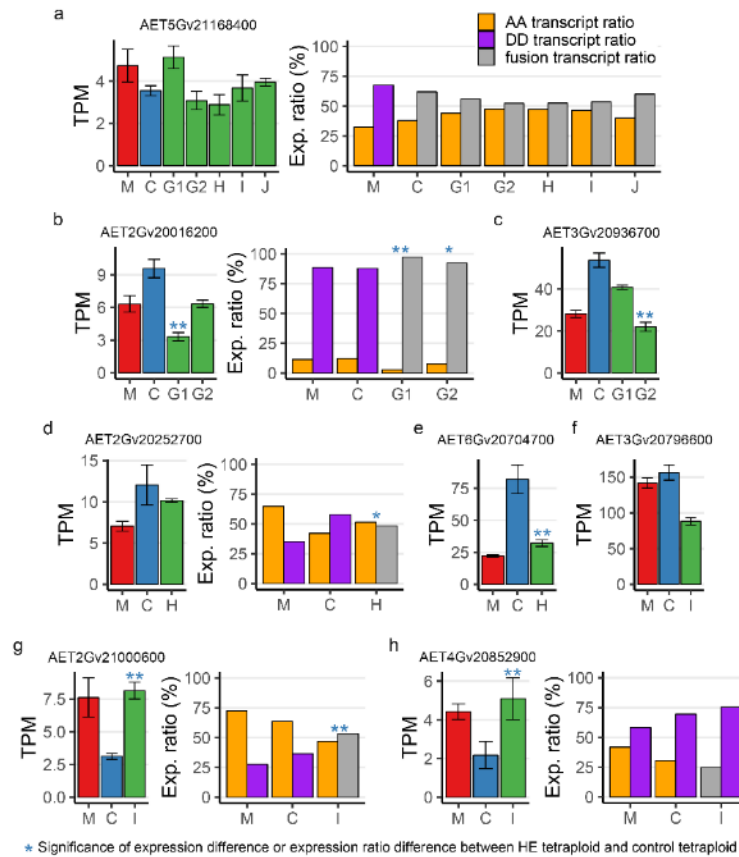

Fig. S6. Expression patterns of eight fusion genes in HE-related tetraploids. RNA-seq data of *in silico* mix (M), control tetraploid (C) and HE tetraploids (G1, G2, H, I and J) were aligned to *Ae. tauschii* reference genome to calculate total expression level. Meanwhile, SNP list between A and D subgenome were used to divide A-specific and D-specific reads to calculate relative expression ratio of A-derived transcript, D-derived transcript and fusion transcript in different samples. For each gene, left panel represents the total expression level and right panel represents the relative expression ratio of different kinds of transcript in M, C and HE tetraploids. Blue asterisks indicate different expression (left panel, based on the results of DEseq2) or different relative expression ratio (right panel, based on Chi-squared test) compared with control sample (\*: p-value < 0.05; \*\*: p-value < 0.01). For (c), three types of transcripts (namely A-derived transcript, D-derived transcript and fusion transcript) generated simultaneously, calculating the relative expression level is not possible. For (e) and (f), only fusion transcript generated, namely the relative expression ratio of fusion transcript is equal to one.

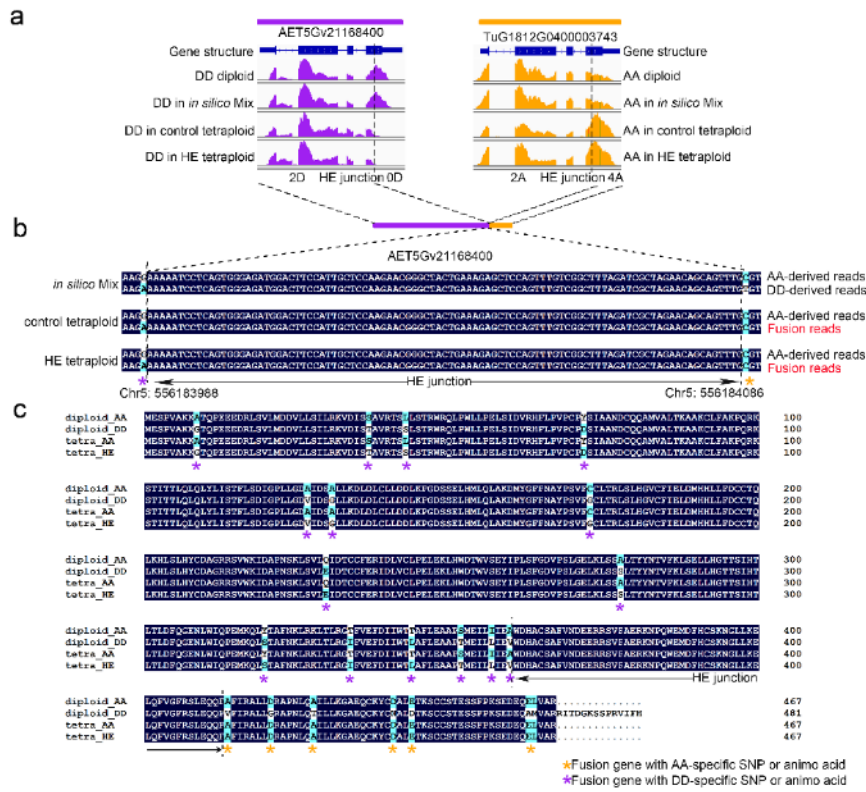

Fig. S7. Gene fusion event between HE-related homoeologous gene pairs. (a) IGV illustration of a candidate homoeolog fusion event based on RNA-seq reads depth. Each track (from up to down) represents the transcript structure and gene expression profile in diploid, *in silico* tetraploid, control tetraploid and HE-related tetraploid, respectively. Orange and purple indicate the profile of A and D subgenome genes, respectively. The position of HE junction were marked as dashed lines. The combination of number and letter flanking the HE junction represent the copy number of a given sub-genome in HE-related tetraploid (2A indicating 2 copies of A subgenome). (b) Validation of fusion transcript based on diploid-specific SNPs method. The tracks represent the consensus sequencing reads in *in silico* mix tetraploid, control tetraploid and HE-related tetraploid. Nucleotides without black background indicate high-confident SNPs between AA and DD diploid and used for genotyping the sequence reads. The asterisks in different colors under SNP positions indicate the origin of SNP (orange for A subgenome and purple for D subgenome) in fusion read. Region between adjacent asterisks of different colors represents HE junction, which position was also shown. (c) Predicted amino acid sequence of fusion transcript by ORFfinder (<https://www.ncbi.nlm.nih.gov/orffinder/>) based on Sanger sequencing. Similar with SNPs in (b), amino acids without black background indicate high-confident variants between AA and DD diploid. The asterisks in different colors under variants positions indicate the origin of amino acid (orange for A subgenome and purple for D subgenome) in predicted fusion protein. Region between adjacent asterisks of different colors represents HE junction.

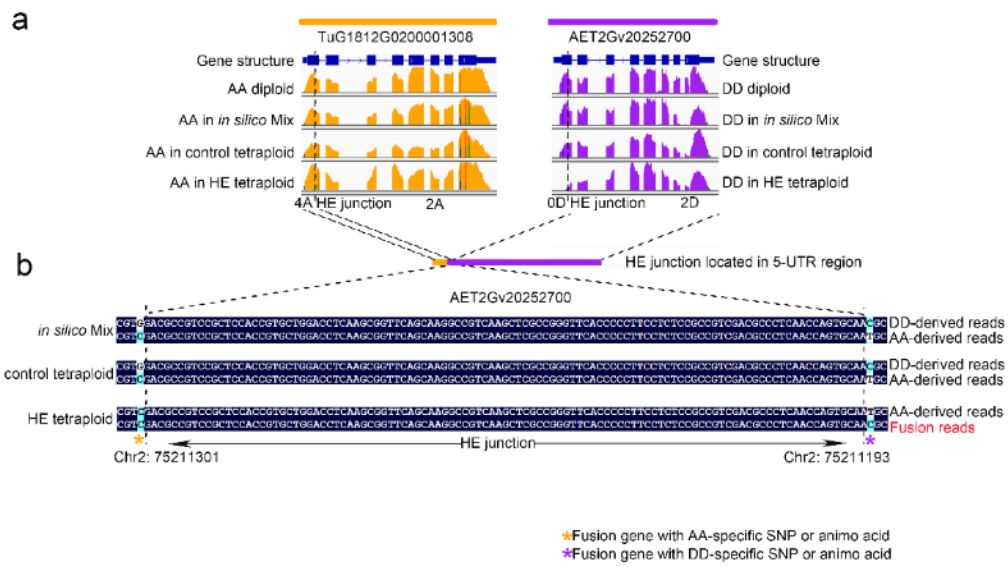

Fig. S7. Gene fusion event 3.

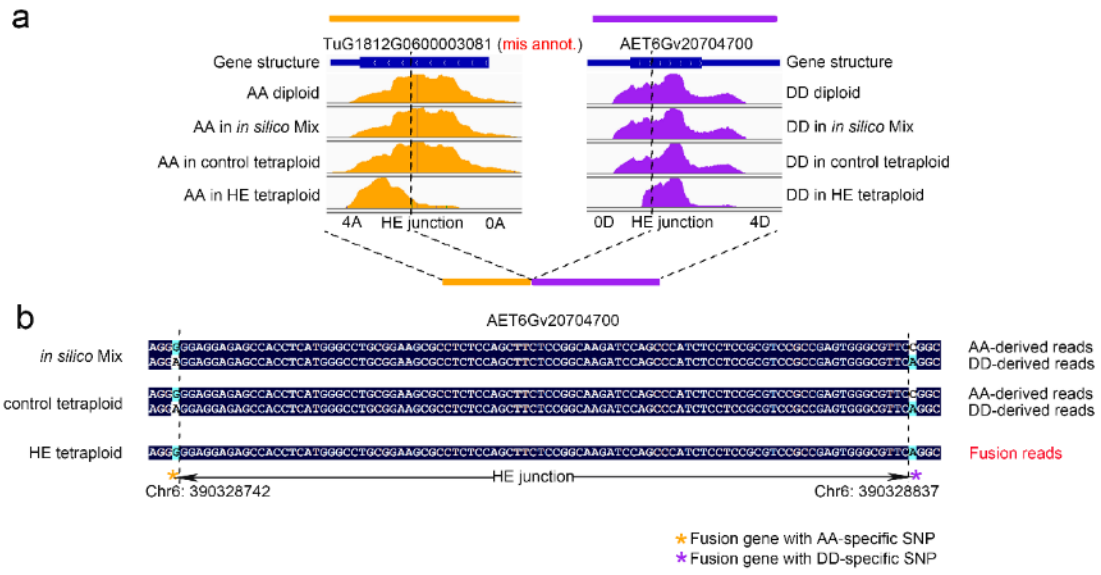

Fig. S7. Gene fusion event 4.

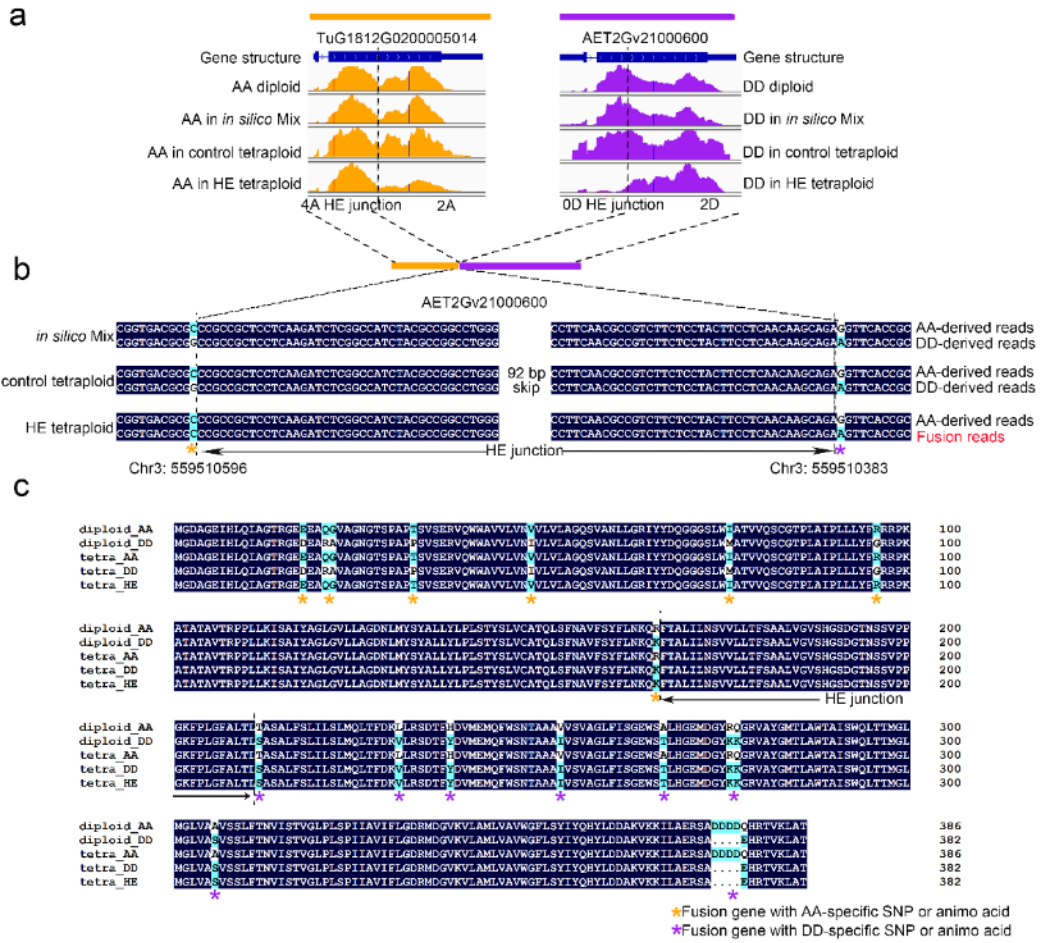

Fig. S7. Gene fusion event 5.



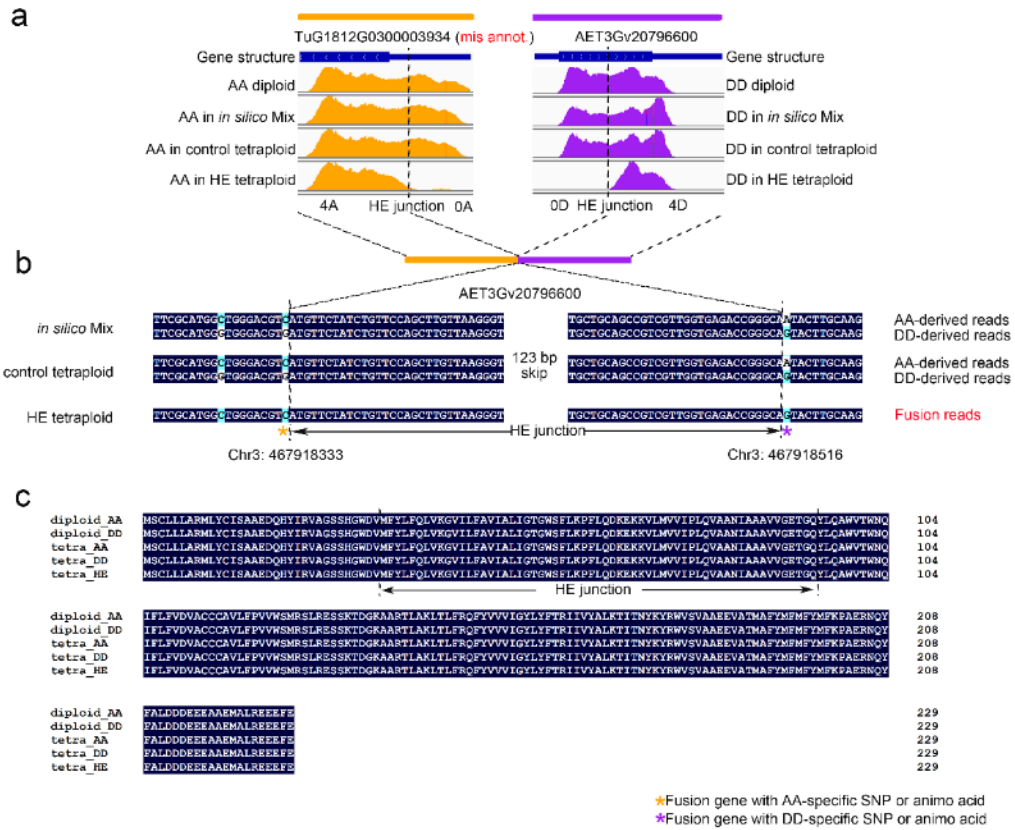

Fig. S7. Gene fusion event 6.

a

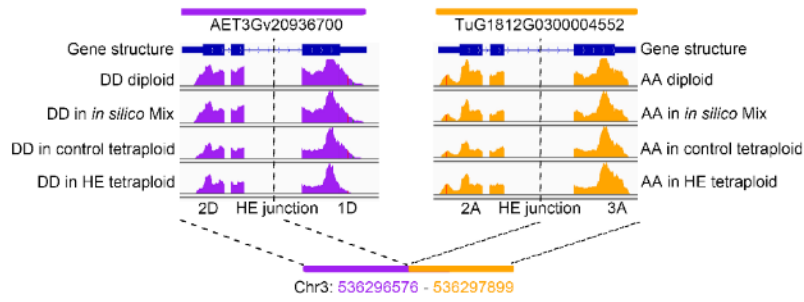

b

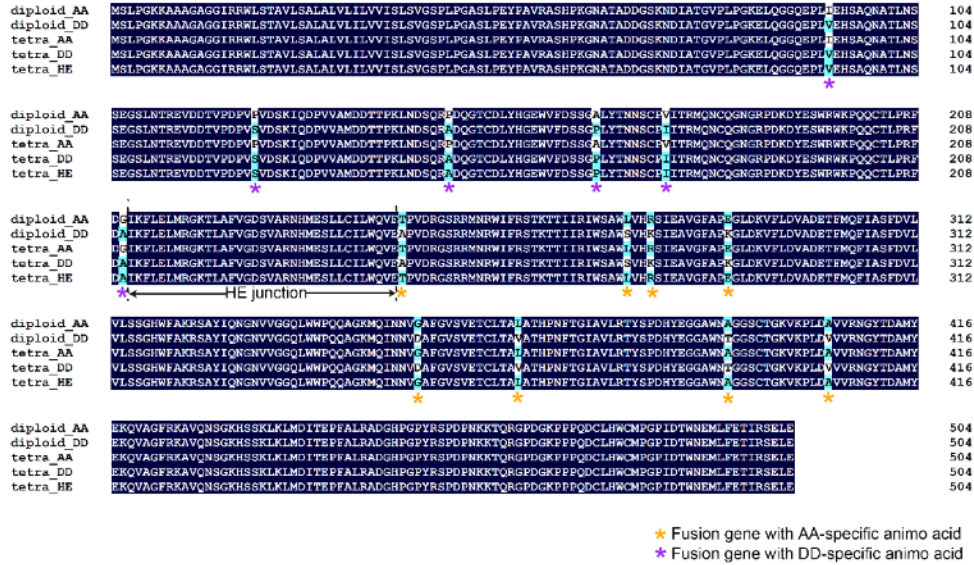

Fig. S7. Gene fusion event 7.

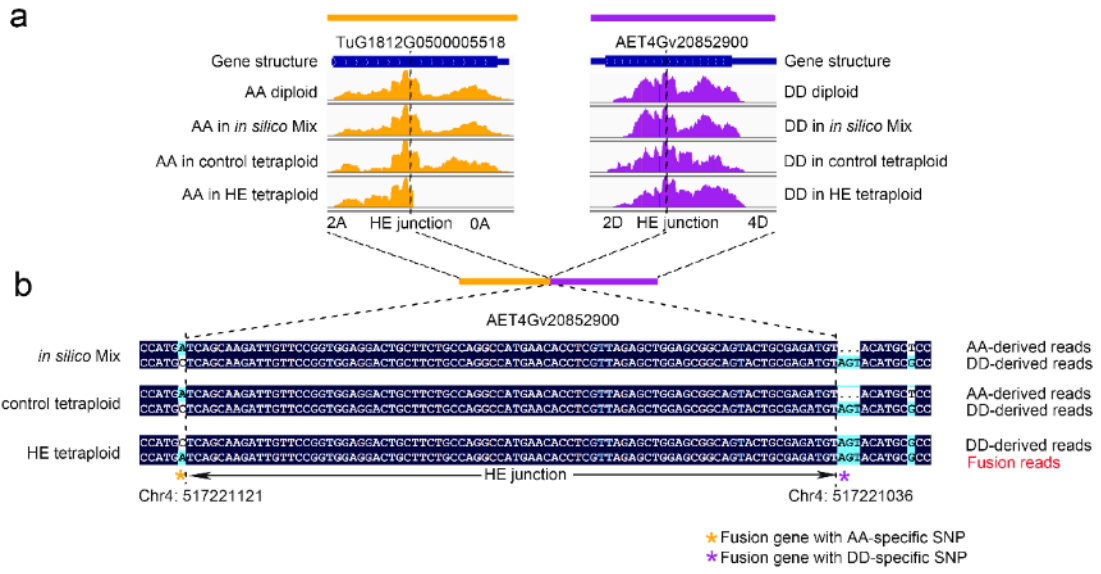

Fig. S7. Gene fusion event 8.

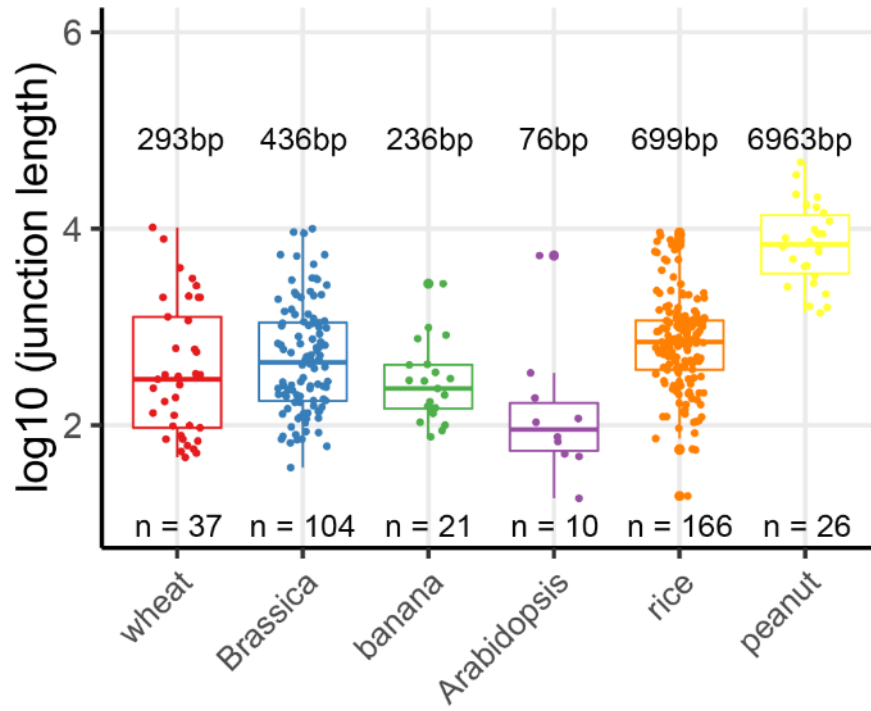

Fig. S8. Resolution of HE junctions based on diploid-specific SNP method in wheat, brassica and peanut. The number of HE junctions are shown above boxes. The median length of HE junctions are shown above of boxes.

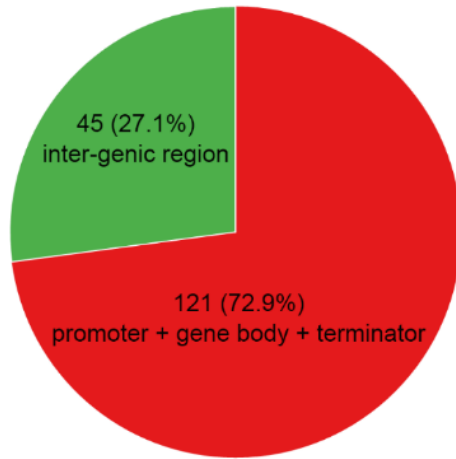

Fig. S9. Proportion of HE junctions including gene related regions (including promoter and terminator regions) and intergenic regions in the Nipponbare genome.

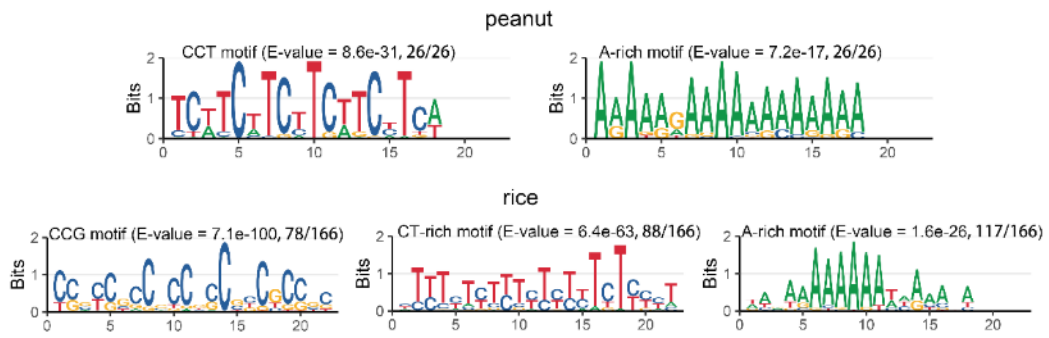

Fig. S10. HE-enriched motif logos in peanut and rice. Similar HE-enriched motif logos in Brassica was shown in Fig. 6b.

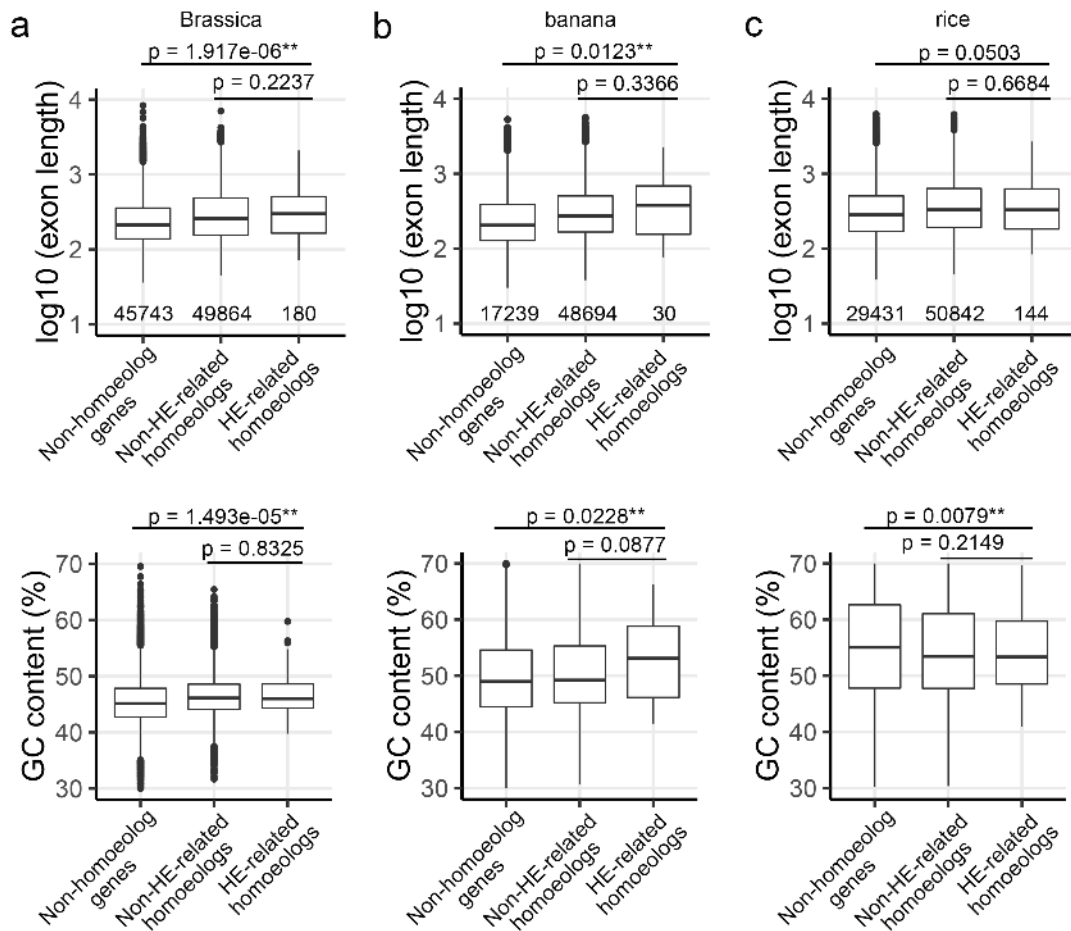

Fig. S11. Comparison of genomic features of HE-related homoeologs with non-HE-related homoeologs and non-homoeologous genes in (a) Brassica, (b) banana and (c) rice. For each species, up panel and bottom panel represent exon length and GC content, respectively, among three types of gene sets. The asterisks indicate significant differences between HE-related homoeologs and non-HE-related homoeologs or non-homoeologous genes (Mann-Whitney-U test; \*: p-value < 0.05; \*\*: p-value < 0.01).

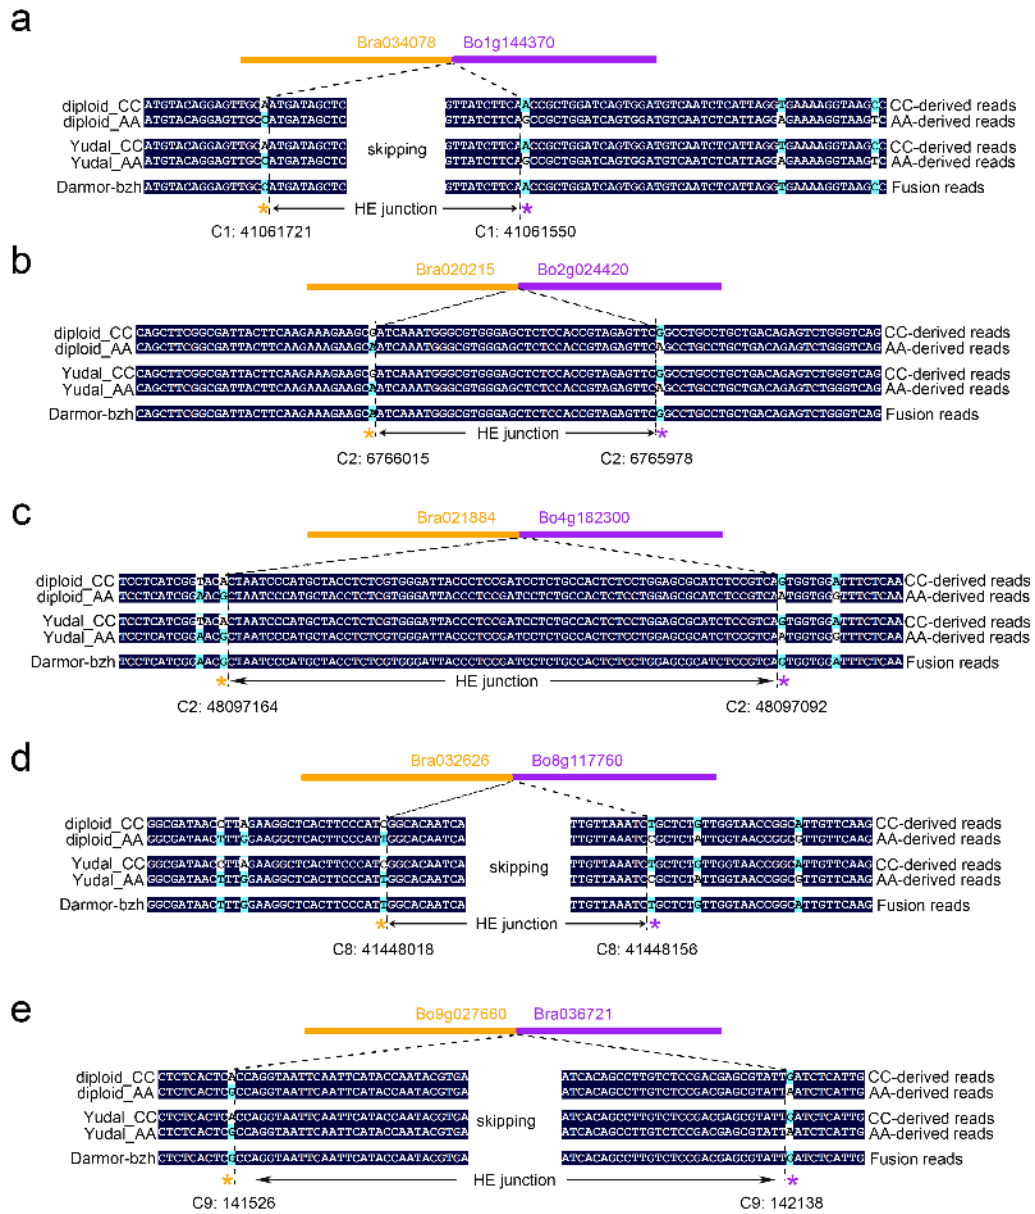

Fig. S12. Validation of gene fusion events based on RNA-seq data in Brassica. For (a) and (b), tracks represent the consensus sequencing reads in *B.oleracea* (CC) and *Brassica rapa* (AA), C and A subgenome in *B.napus* “Yudal” (control tetraploid) and HE-related tetraploid “Darmor-bzh”. Nucleotides without black background indicate high-confident SNPs between AA and CC diploid and used for genotyping the sequence reads. The asterisks in different colors under SNP positions indicate the origin of SNP (orange for A subgenome and purple for C subgenome) in fusion read. Region between adjacent asterisks with different colors represents HE junction, which position was also shown. Other similar cases of HE-related gene fusion events in Brassica were shown in Fig. 6e.



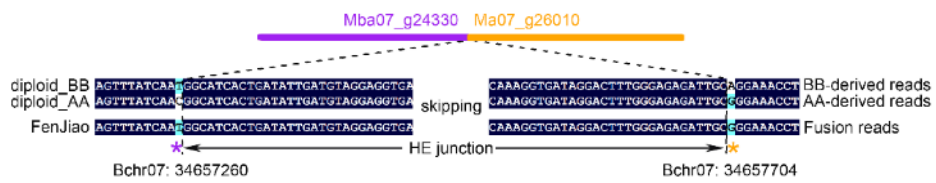

Fig. S13. Validation of gene fusion events based on RNA-seq data in banana. For (a) and (b), tracks represent the consensus sequencing reads in *M.balbisiana* (BB) and *M.acuminata* (AA), B and A subgenome in HE-related triploid “Fenjiao” (control tetraploid). Nucleotides without black background indicate high-confident SNPs between AA and BB diploid and used for genotyping the sequence reads. The asterisks in different colors under SNP positions indicate the origin of SNP (orange for A subgenome and purple for B subgenome) in fusion read. Region between adjacent asterisks with different colors represents HE junction, which position was also shown. Other similar cases of HE-related gene fusion events in banana were shown in Fig. 6e.

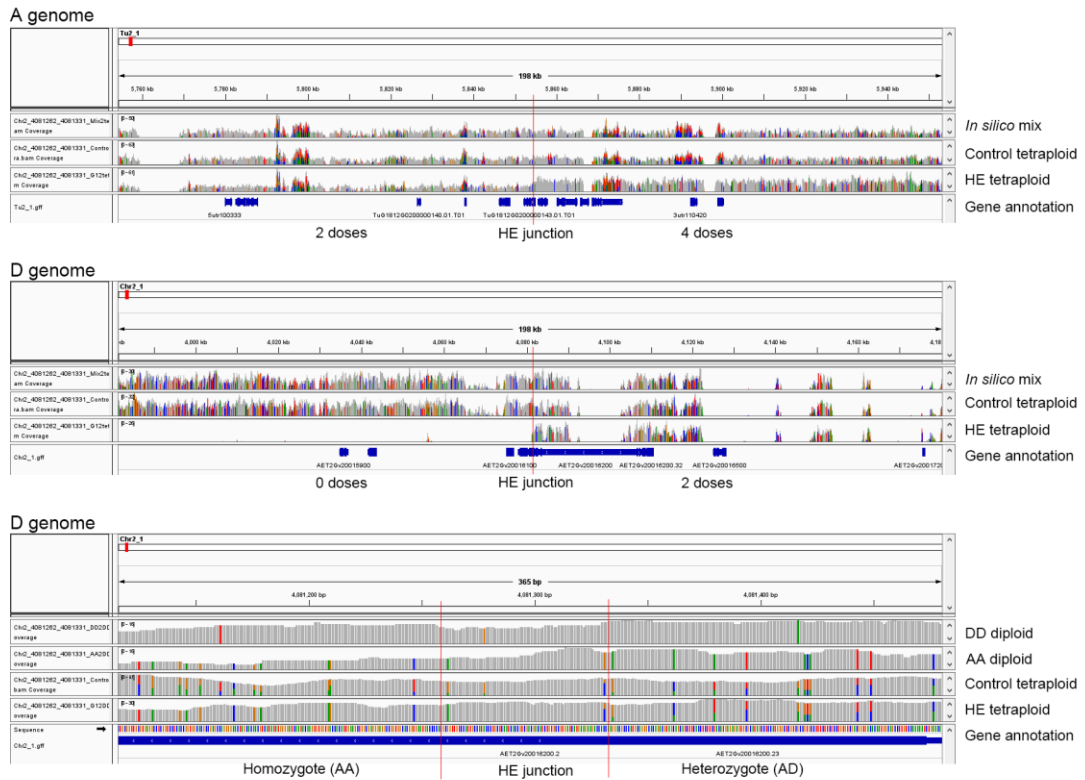

Fig. S14. IGV panels of HE junction regions in AADD tetraploid wheat (37 junctions). The top and middle panels show the sequencing depth around HE junctions in both A and D subgenomes, respectively. Red lines indicate the position of HE junctions and genome dosages are shown on both sides of HE junction. The bottom panel shows the genotypes (homozygote or heterozygote) around HE junction (region between red lines) based on SNP genotyping.

A genome

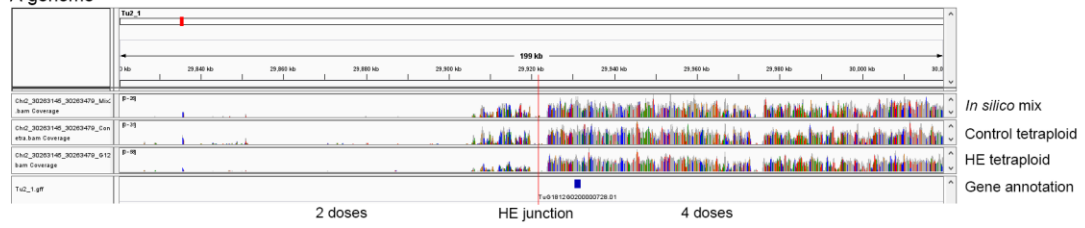

D genome

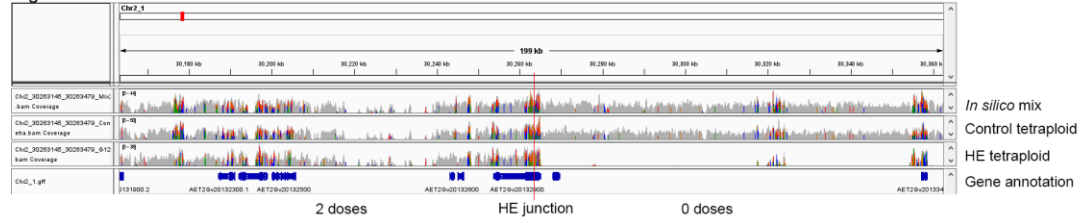

D genome

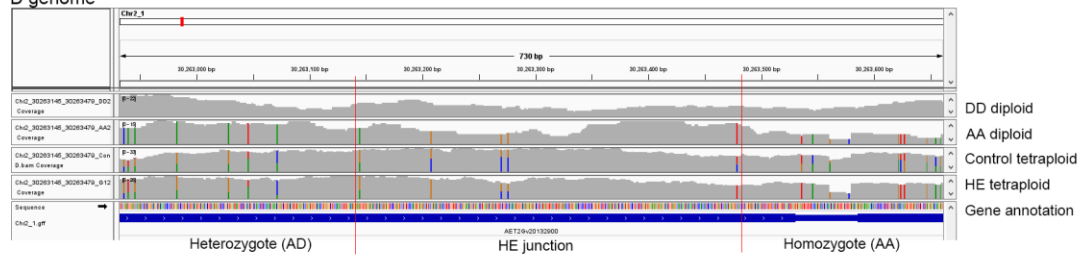

HE junction 2.

A genome

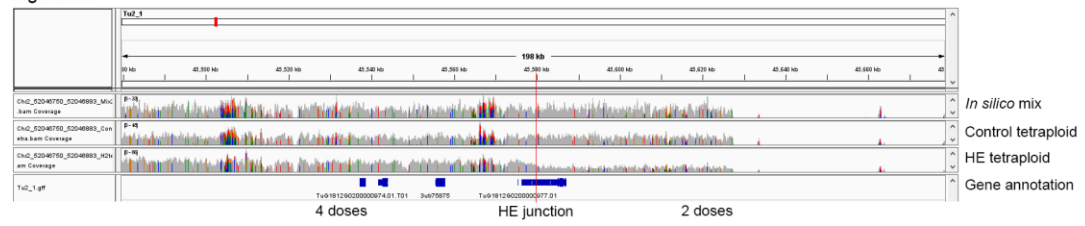

D genome

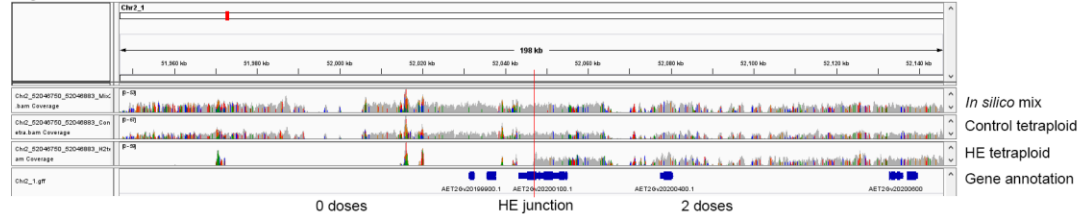

D genome

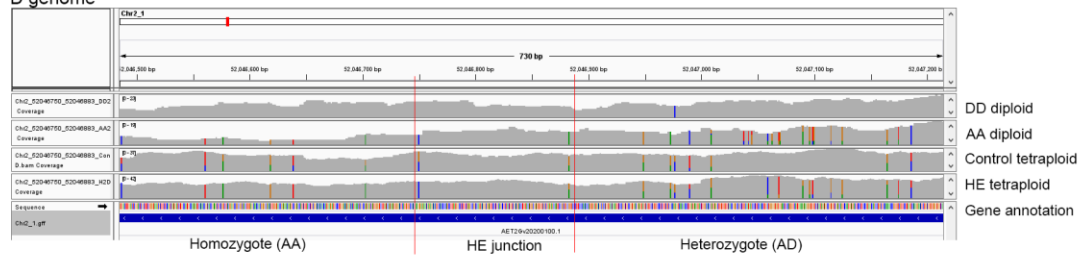

HE junction 3.

A genome

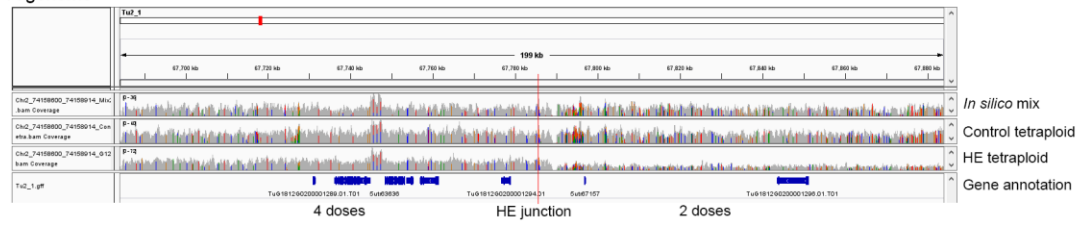

D genome

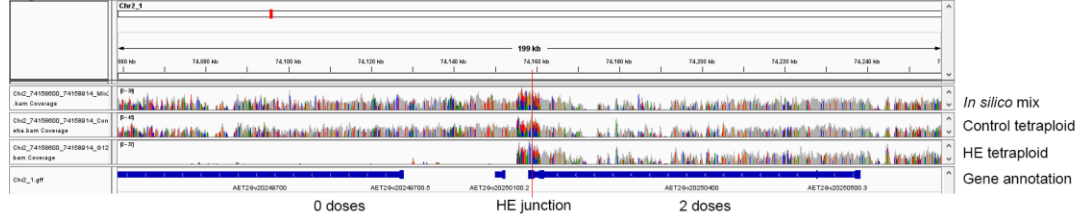

D genome

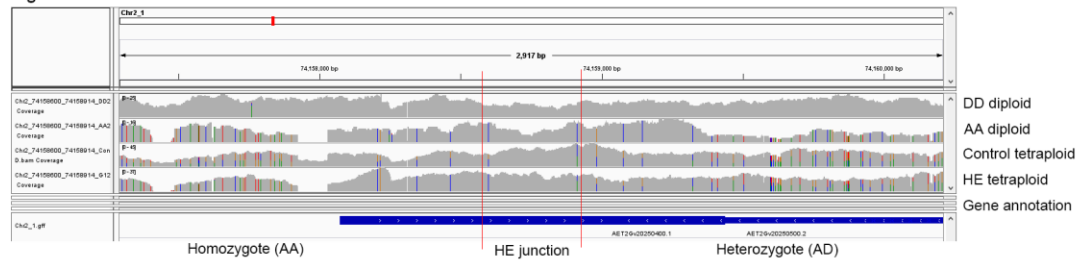

HE junction 4.

A genome

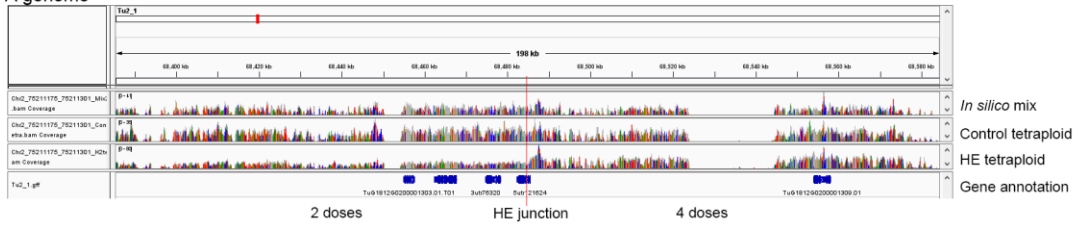

D genome

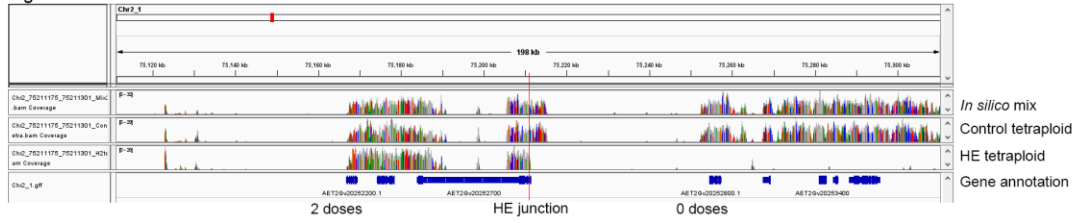

D genome

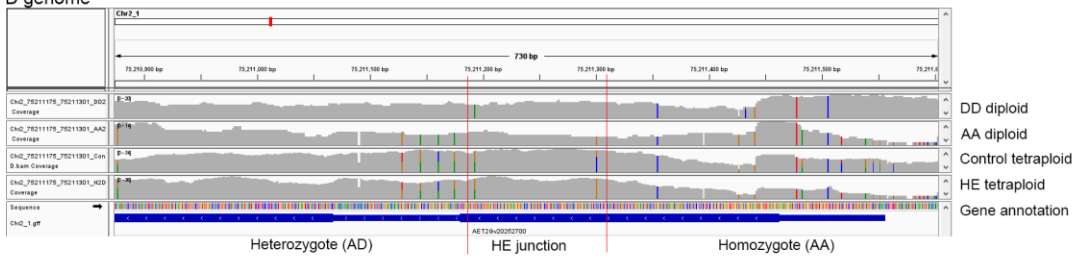

HE junction 5.

A genome

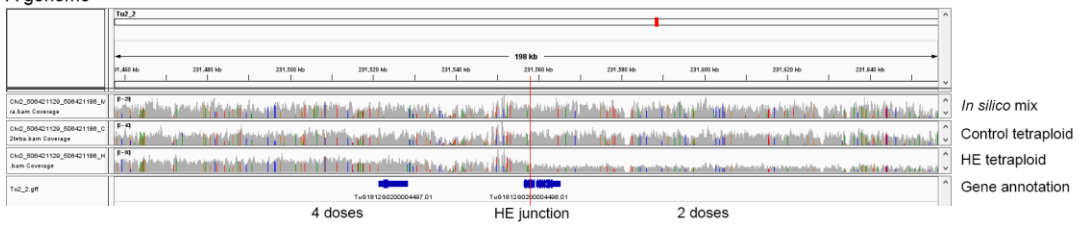

D genome

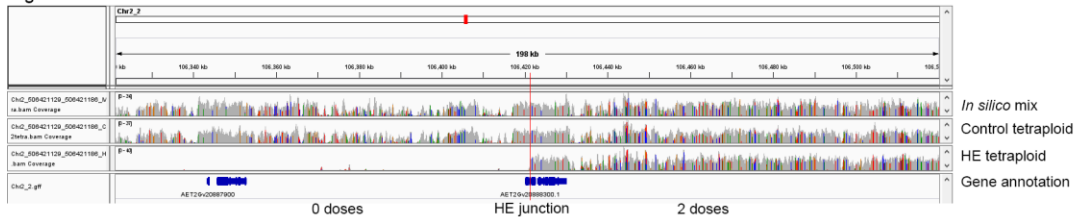

D genome

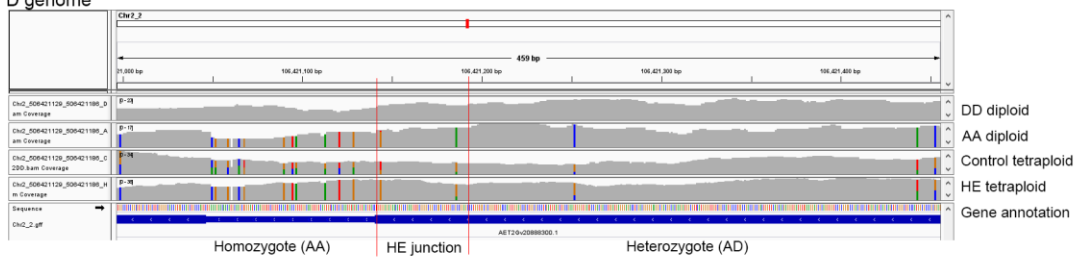

HE junction 6.

A genome

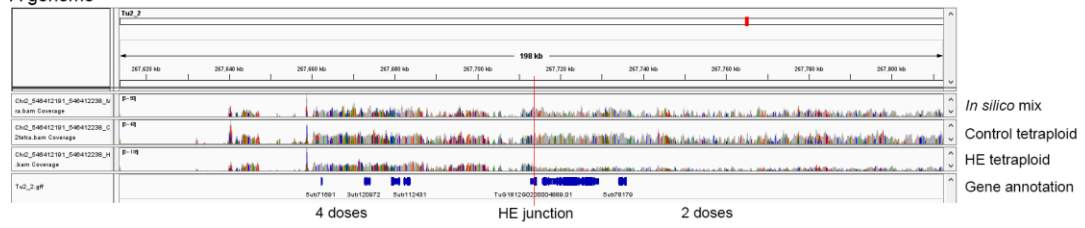

D genome

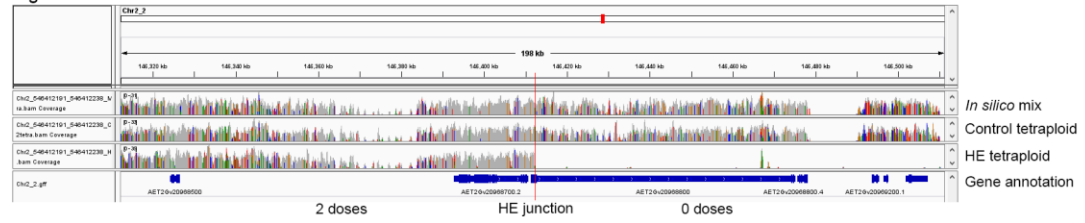

D genome

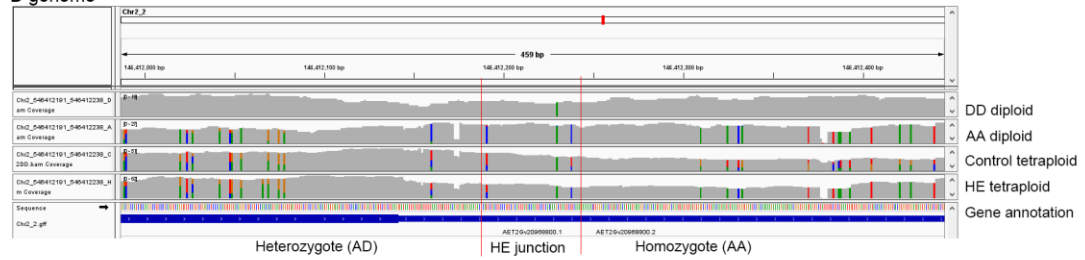

HE junction 7.



A genome

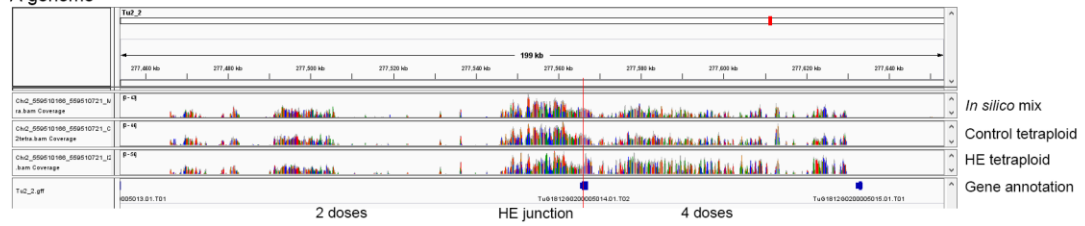

D genome

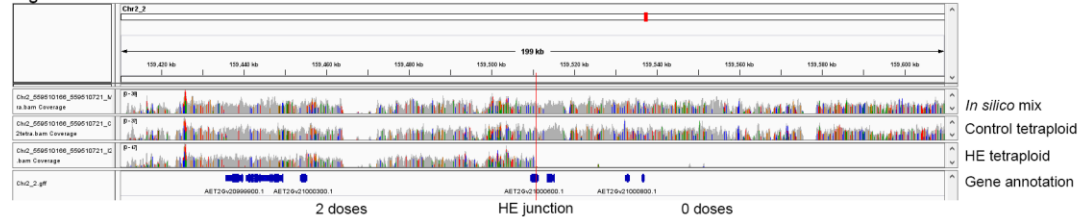

D genome

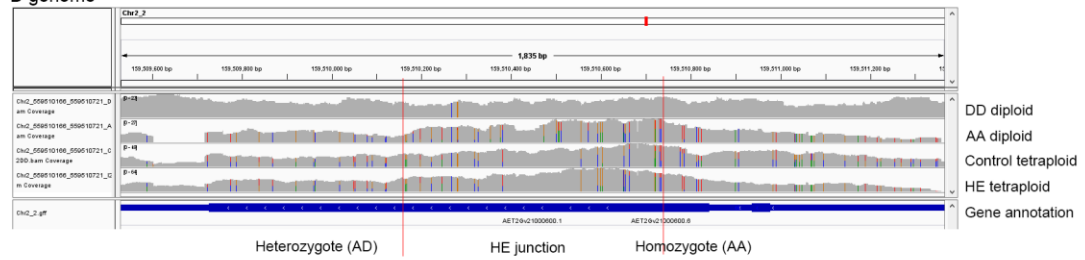

HE junction 8.

A genome

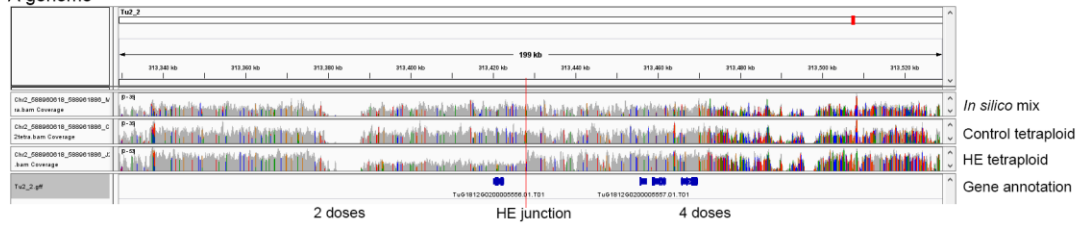

D genome

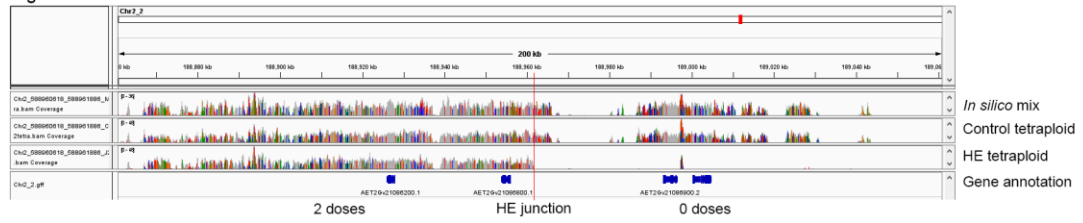

D genome

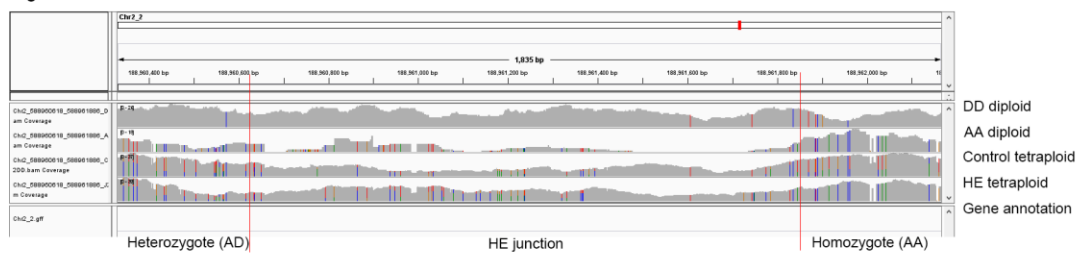

HE junction 9.

A genome

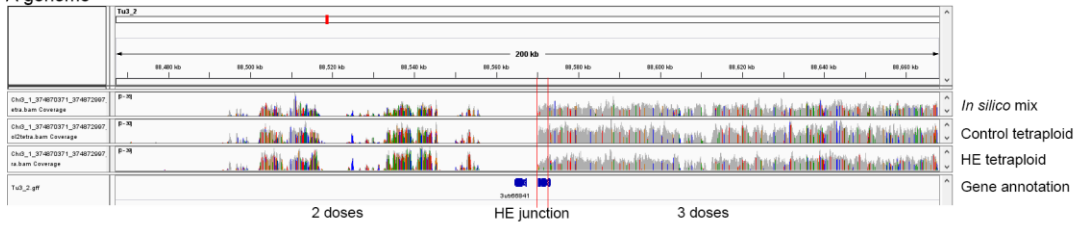

D genome

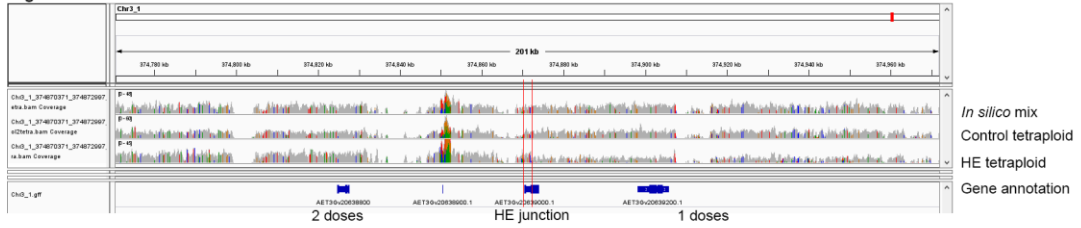

HE junction 10.

A genome

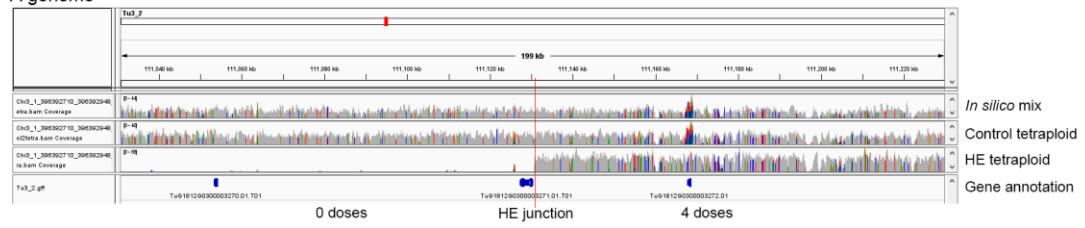

D genome

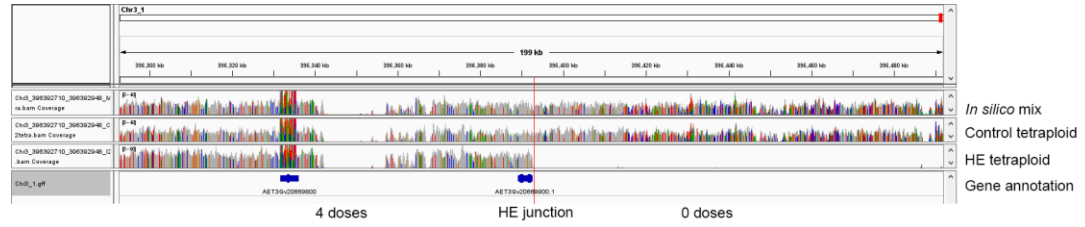

D genome

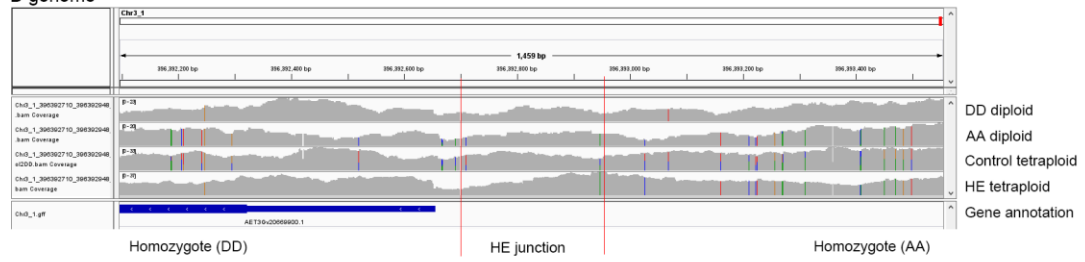

HE junction 11.

A genome

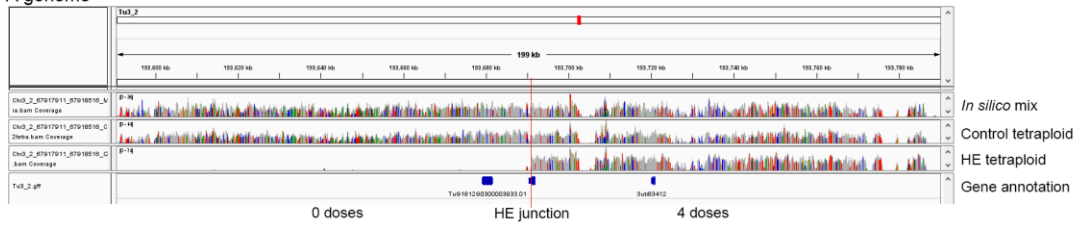

D genome

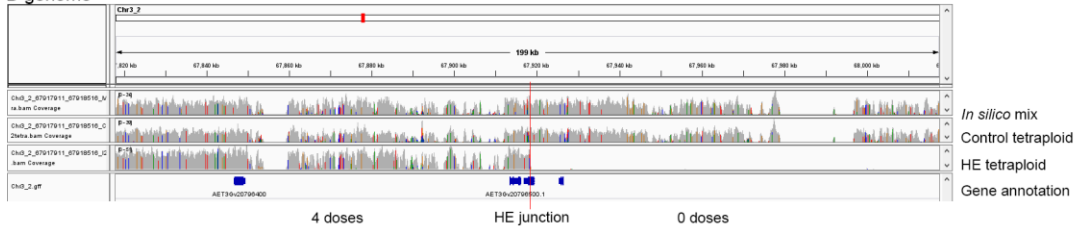

D genome

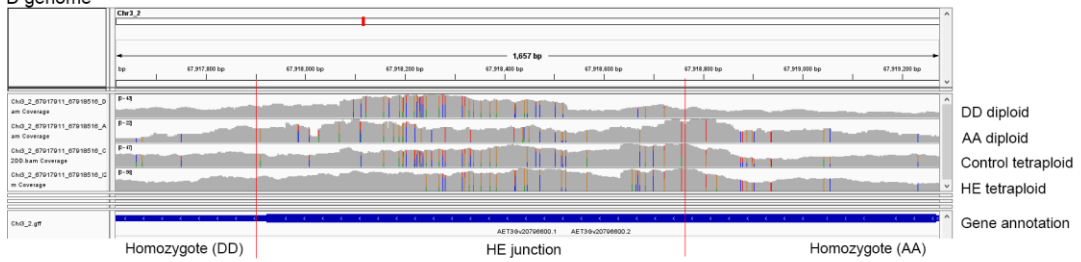

HE junction 12.

### A genome

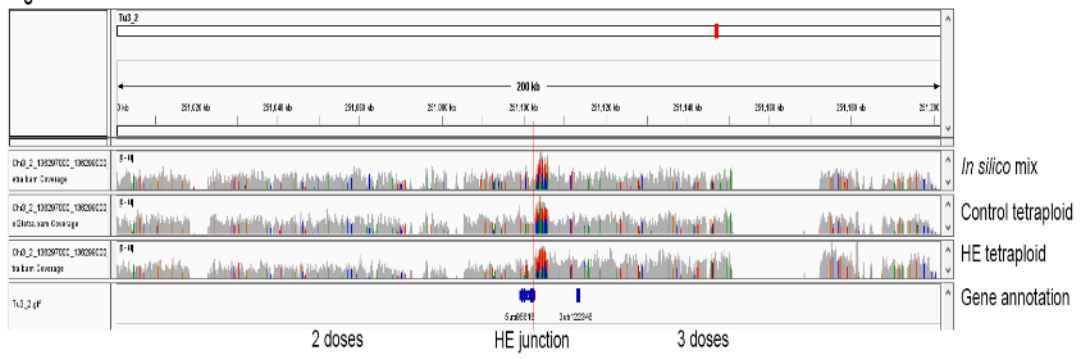

### D genome

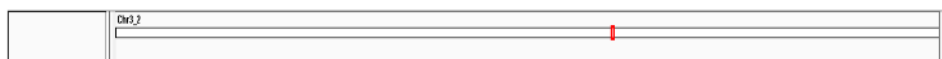

HE junction 13.

A genome

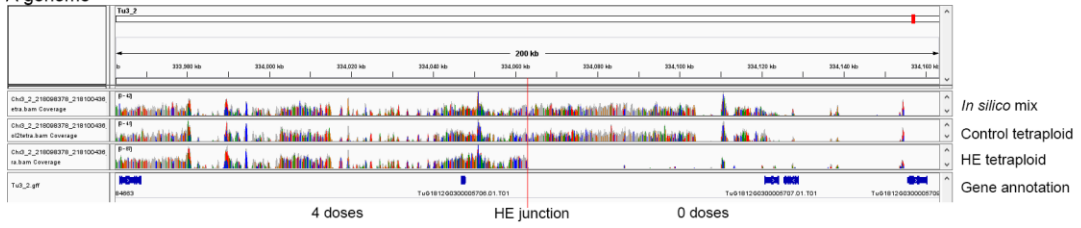

D genome

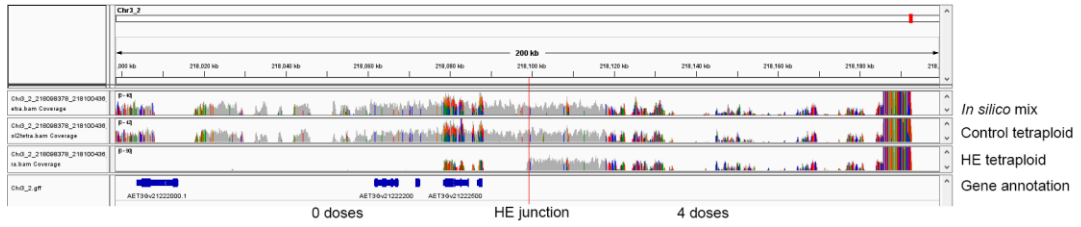

D genome

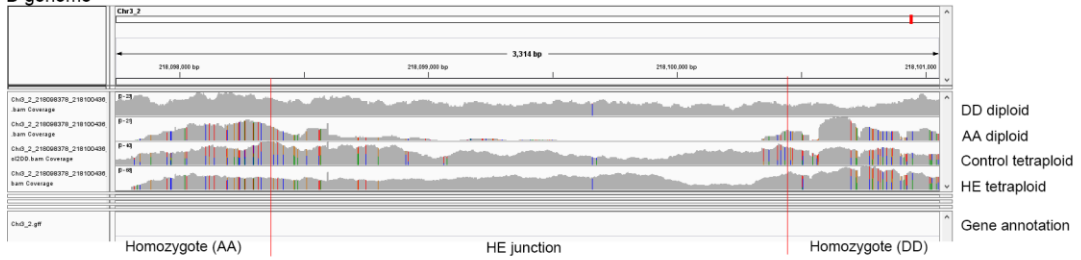

HE junction 14.

A genome

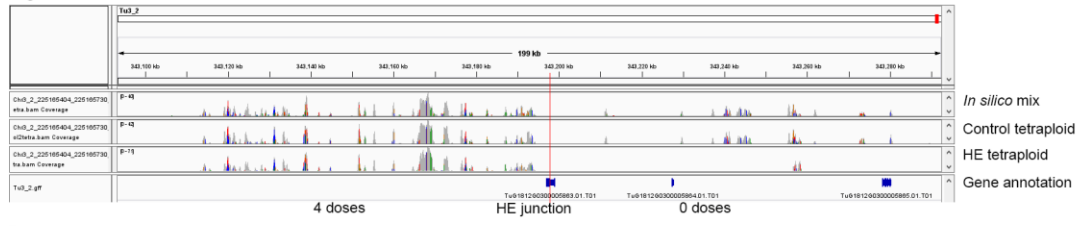

D genome

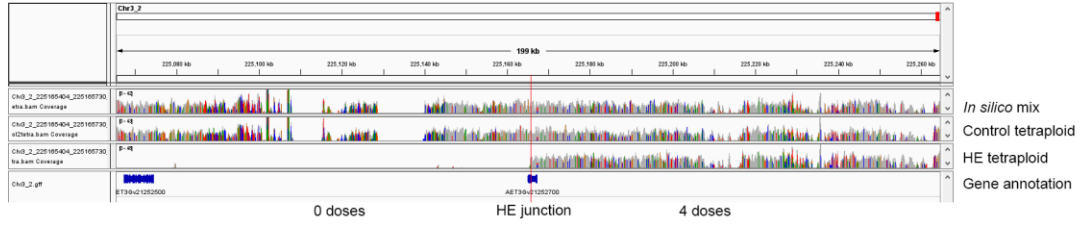

D genome

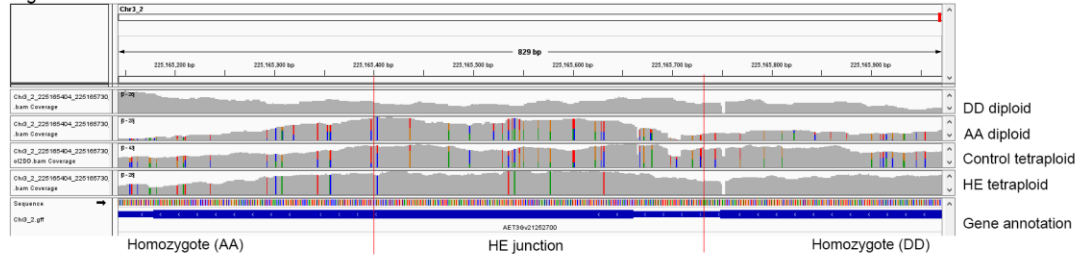

HE junction 15.



A genome

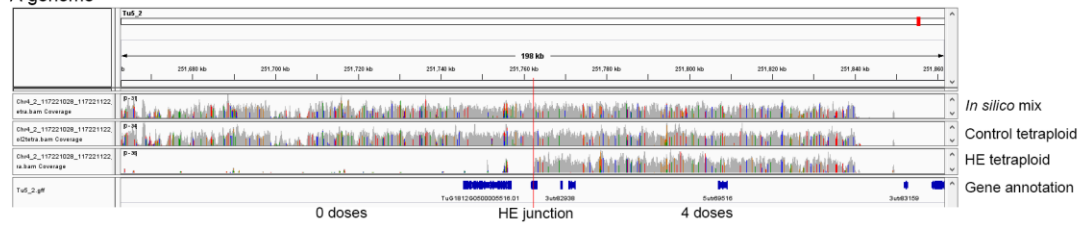

D genome

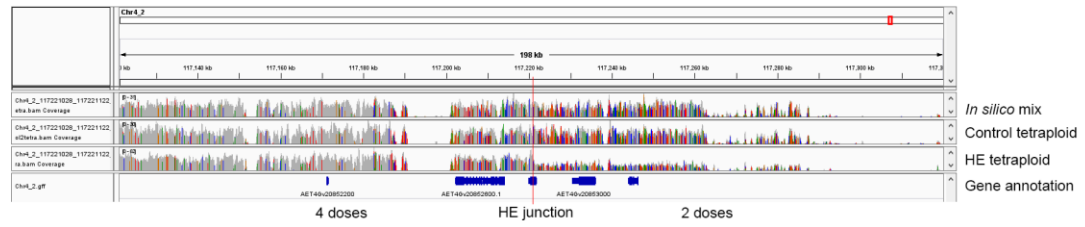

D genome

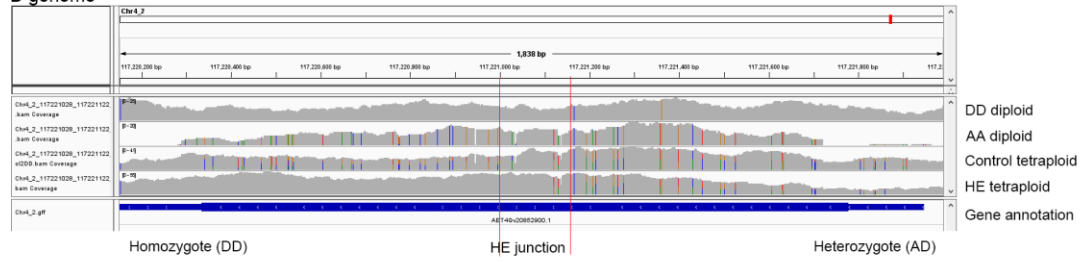

HE junction 16.

A genome

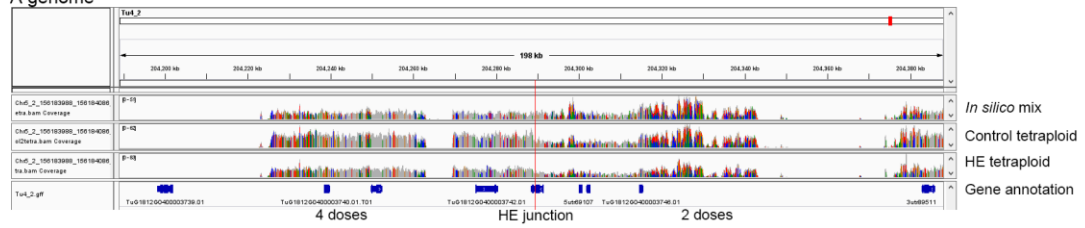

D genome

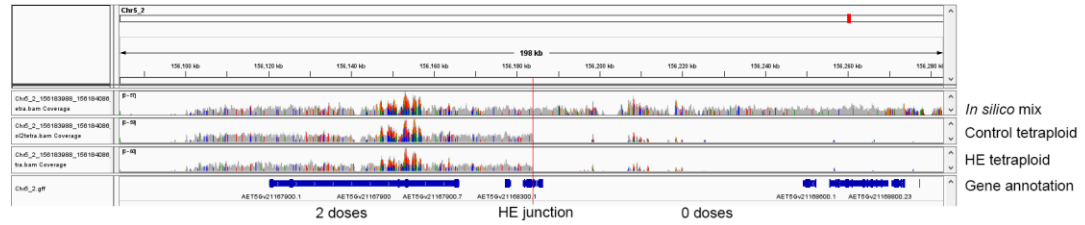

D genome

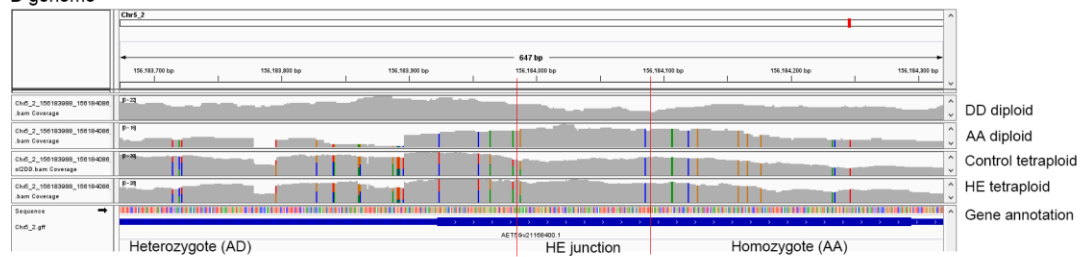

HE junction 17.

A genome

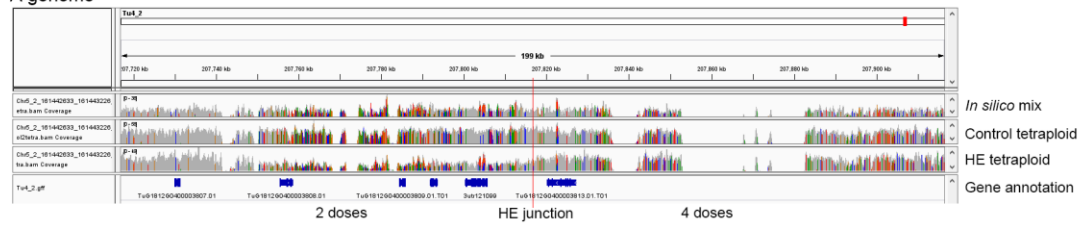

D genome

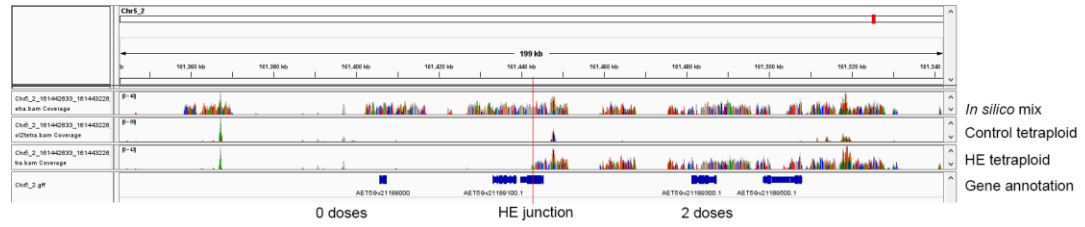

D genome

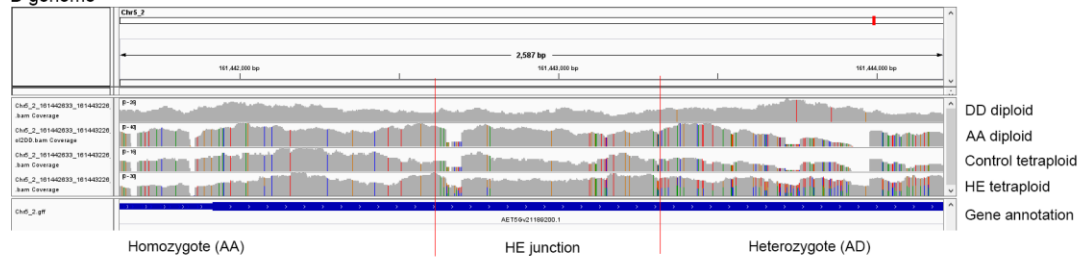

HE junction 18.

A genome

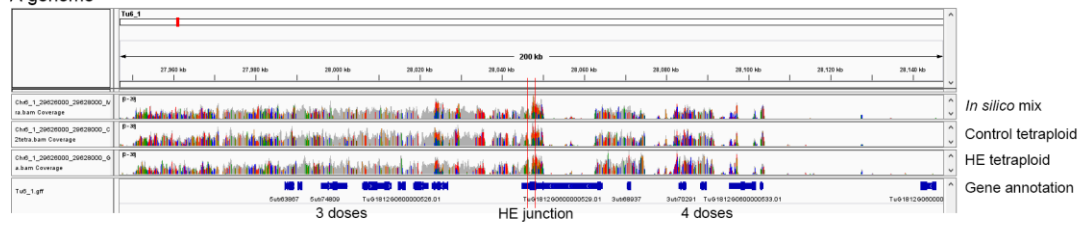

D genome

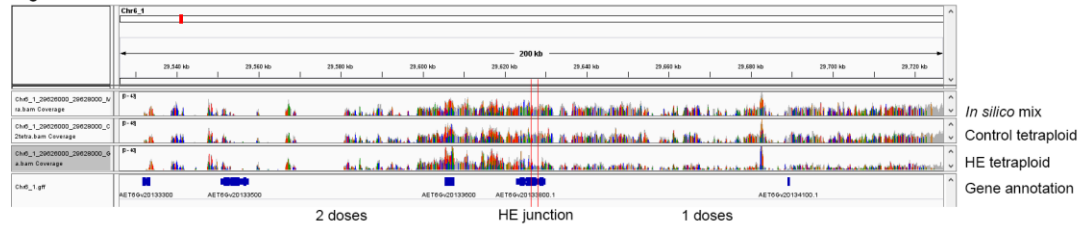

HE junction 19.

A genome

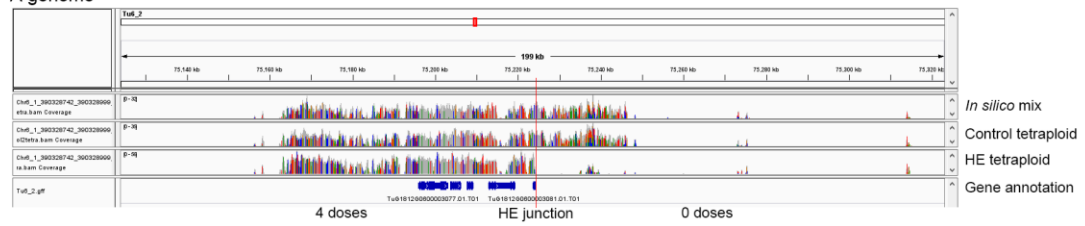

D genome

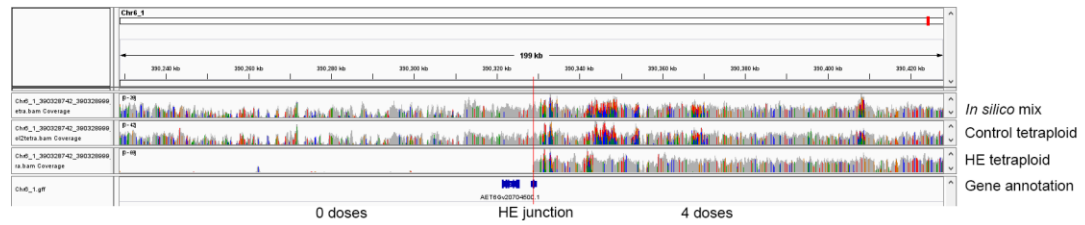

D genome

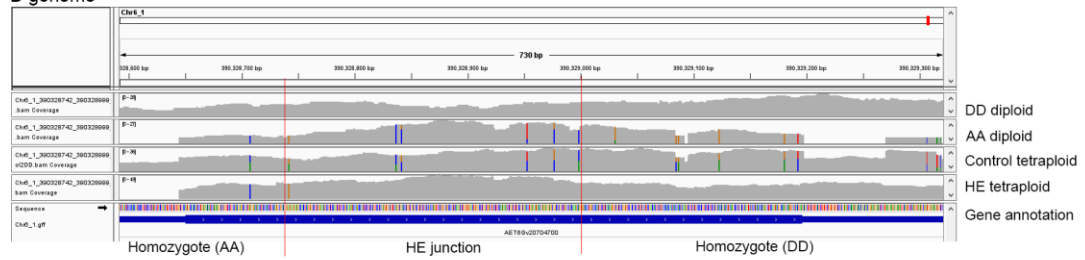

HE junction 20.

A genome

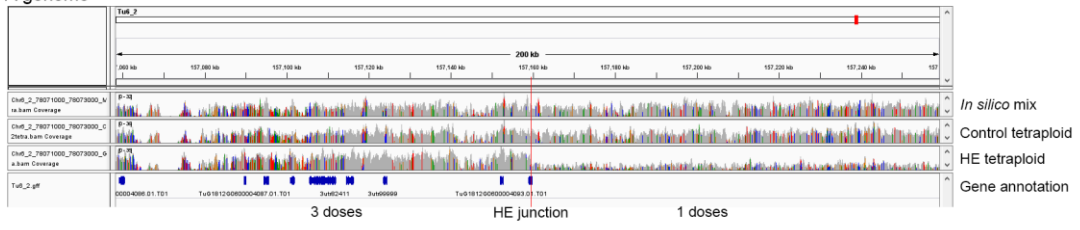

D genome

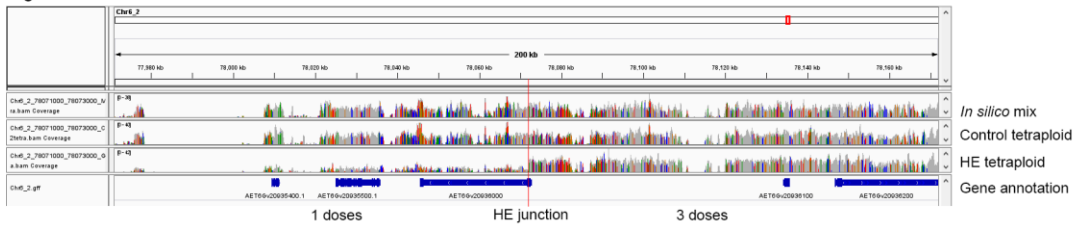

HE junction 21.

A genome

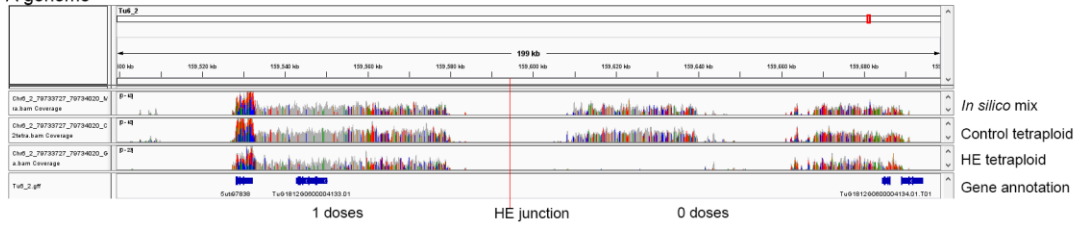

D genome

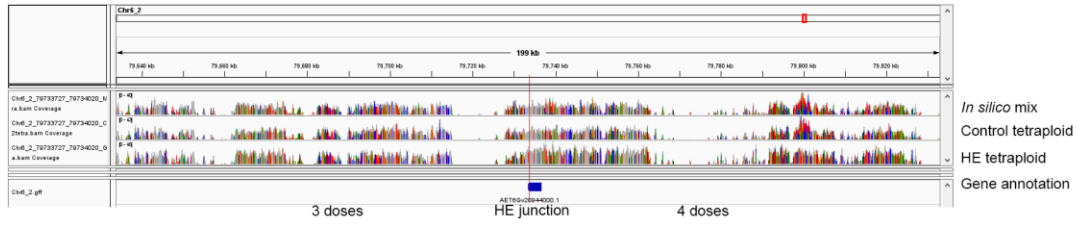

D genome

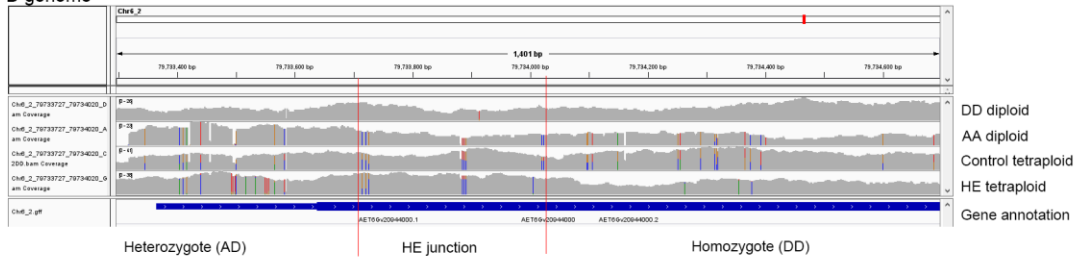

HE junction 22.

A genome

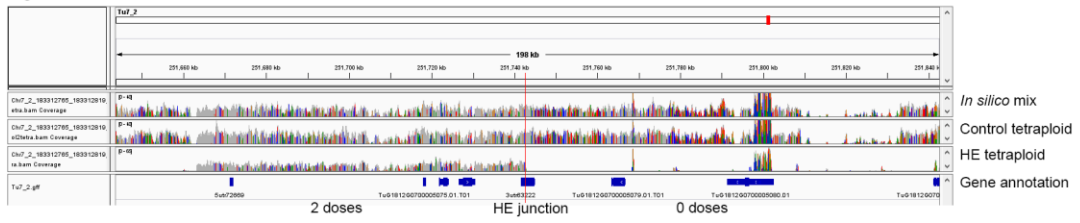

D genome

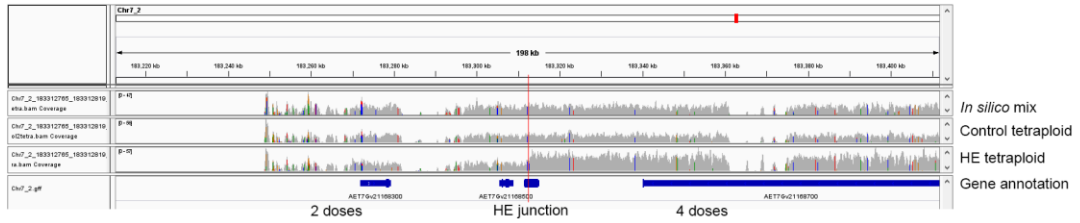

D genome

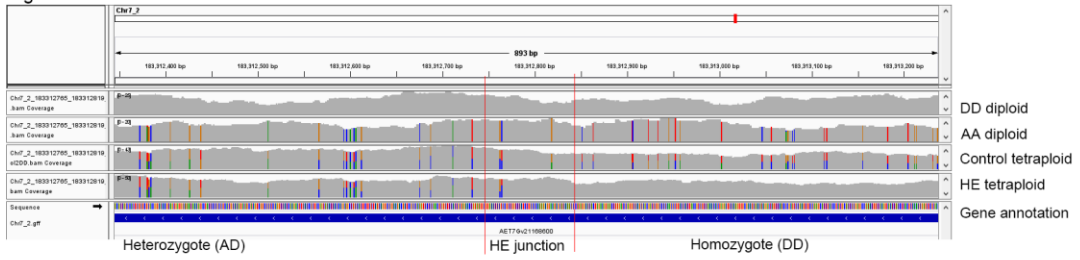

HE junction 23.



A genome

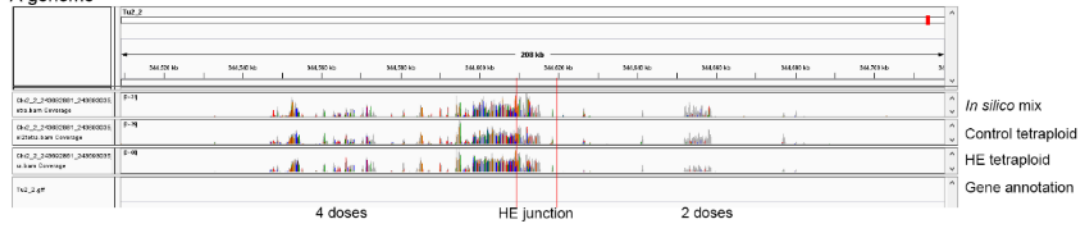

D genome

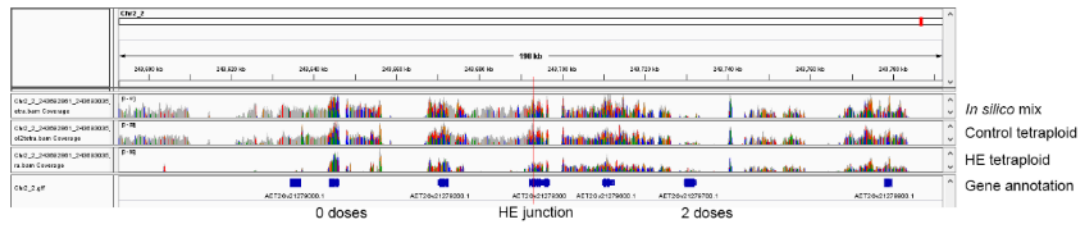

D genome

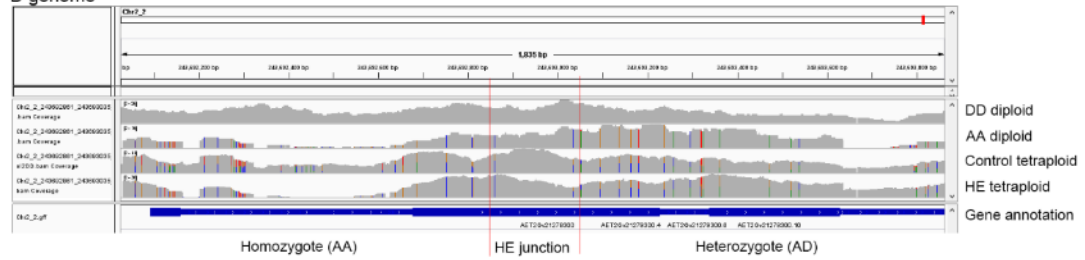

HE junction 24.

A genome

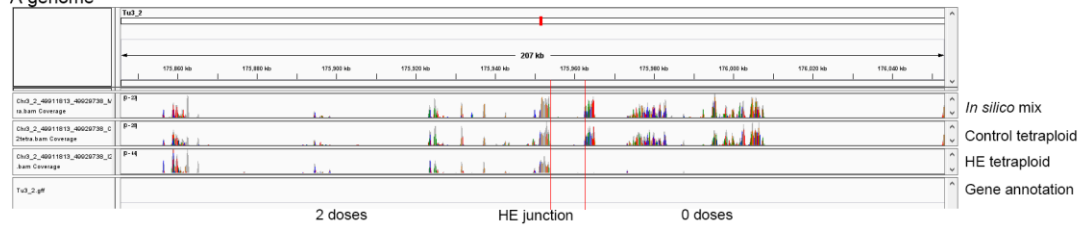

D genome

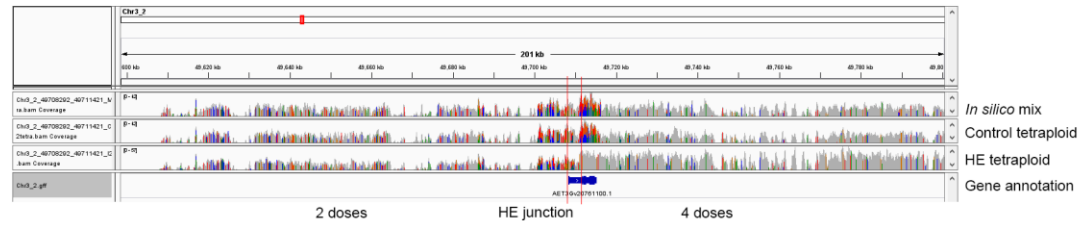

D genome

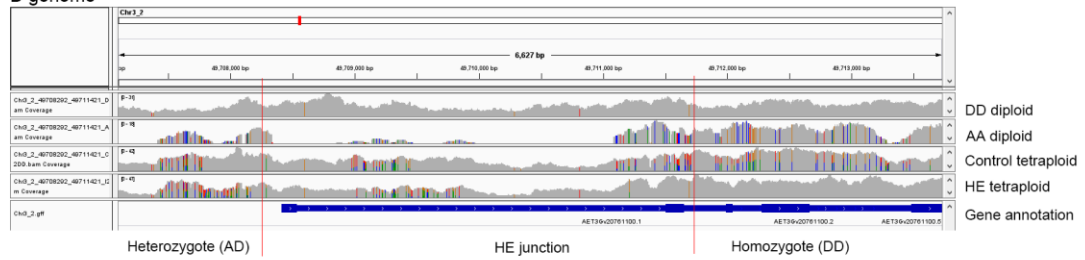

HE junction 25

A genome

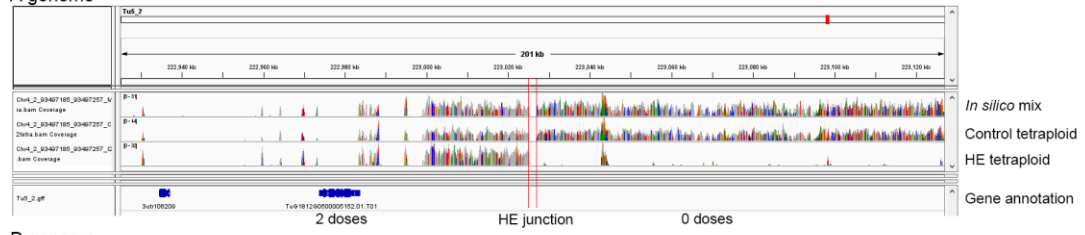

D genome

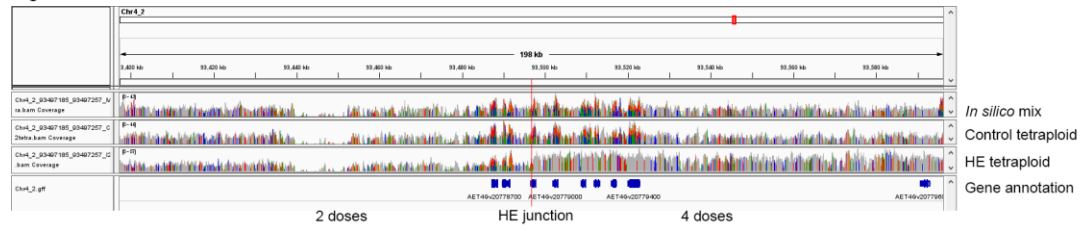

D genome

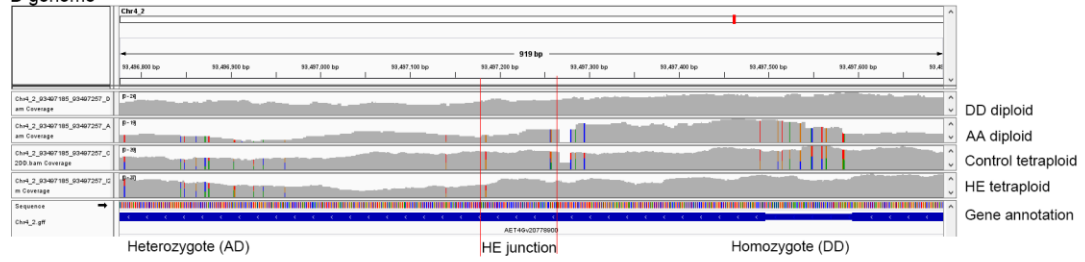

HE junction 26.

A genome

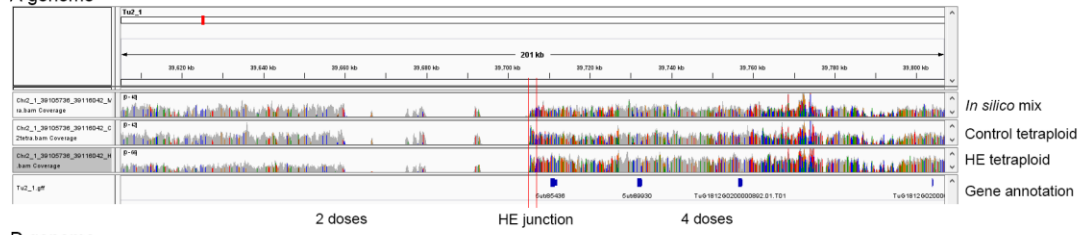

D genome

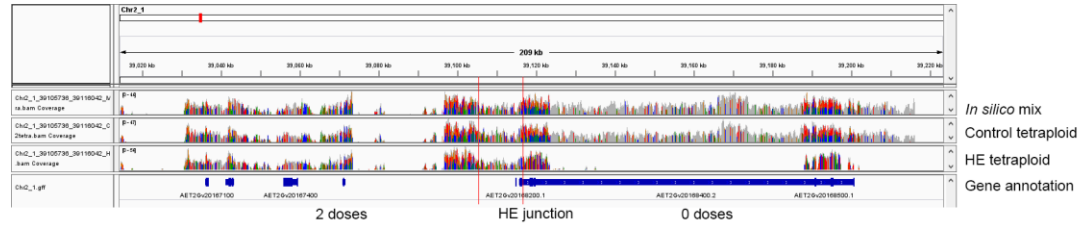

D genome

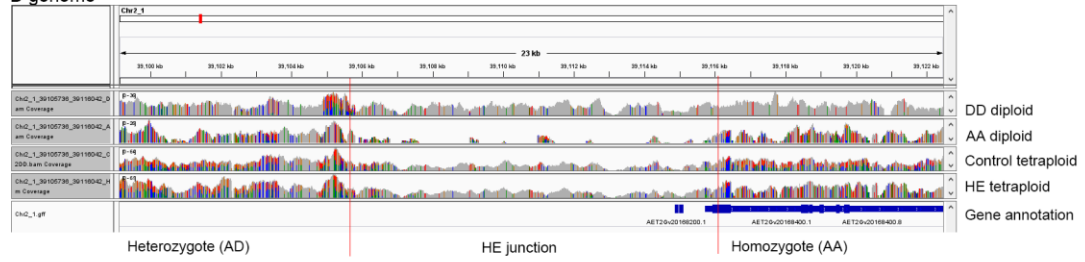

HE junction 27.

A genome

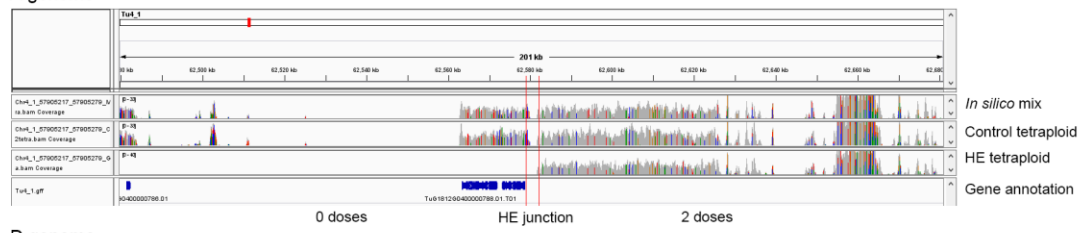

D genome

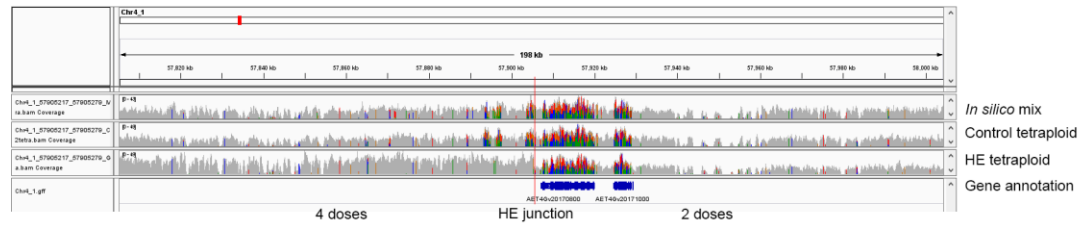

D genome

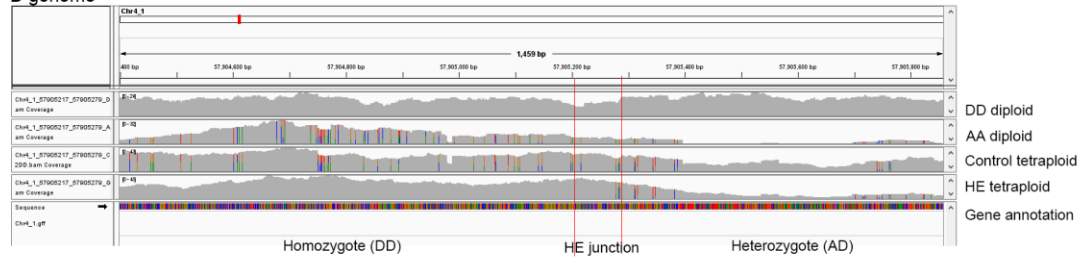

HE junction 28.

A genome

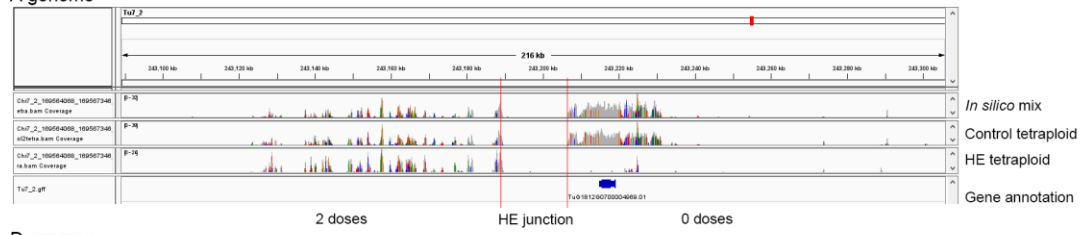

D genome

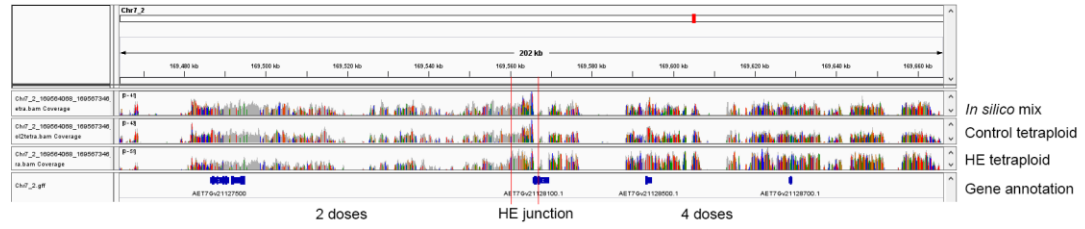

D genome

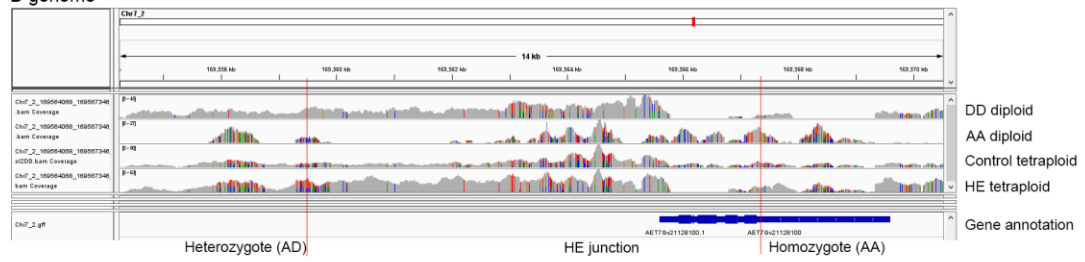

HE junction 29.

A genome

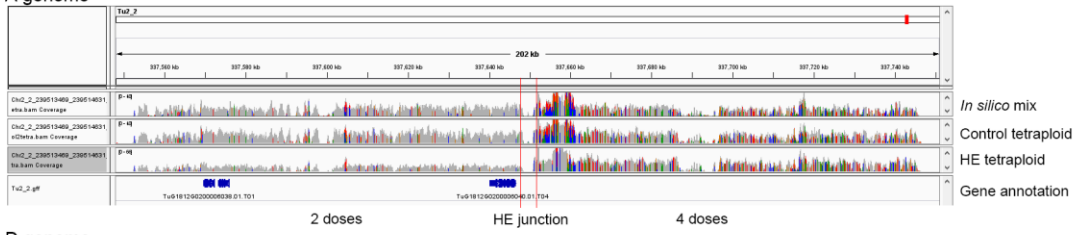

D genome

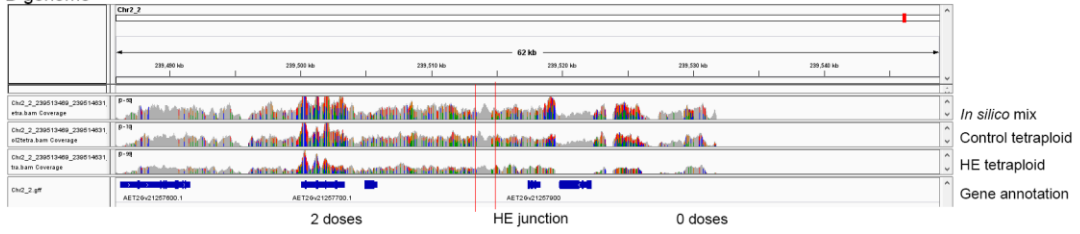

D genome

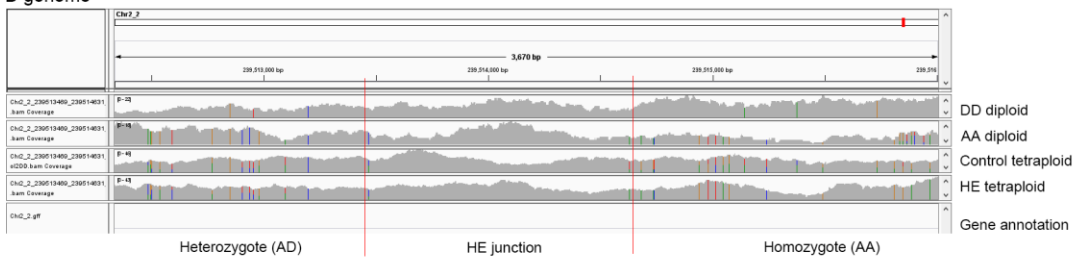

HE junction 30.

A genome

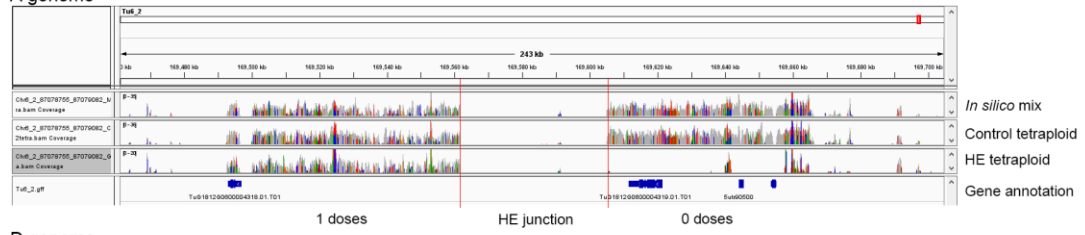

D genome

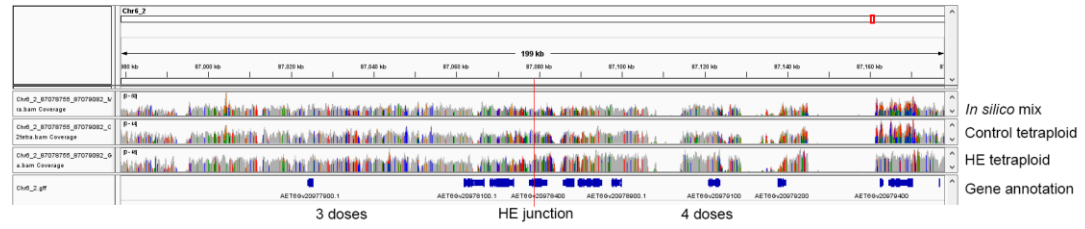

D genome

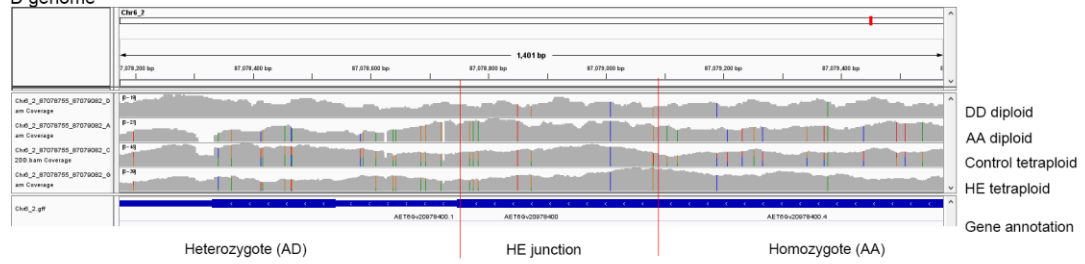

HE junction 31.



A genome

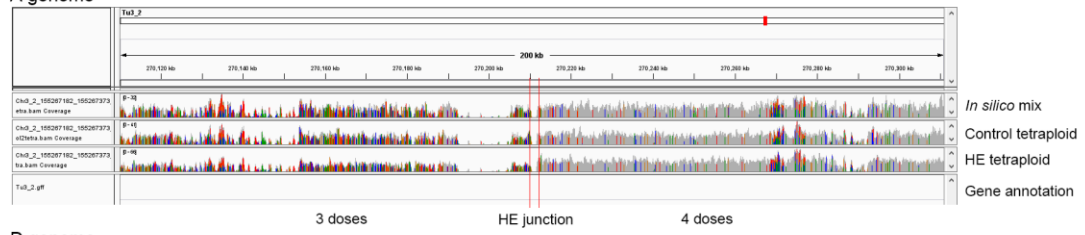

D genome

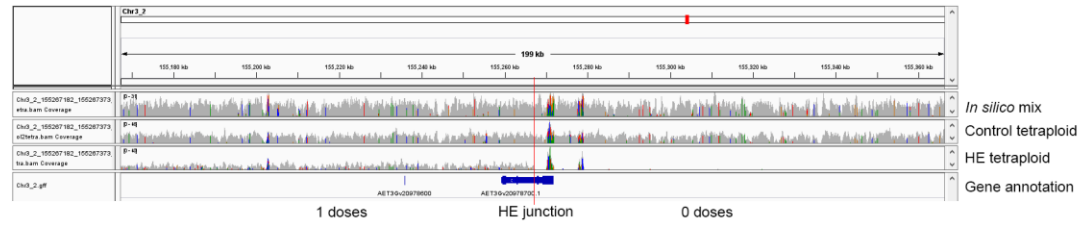

D genome

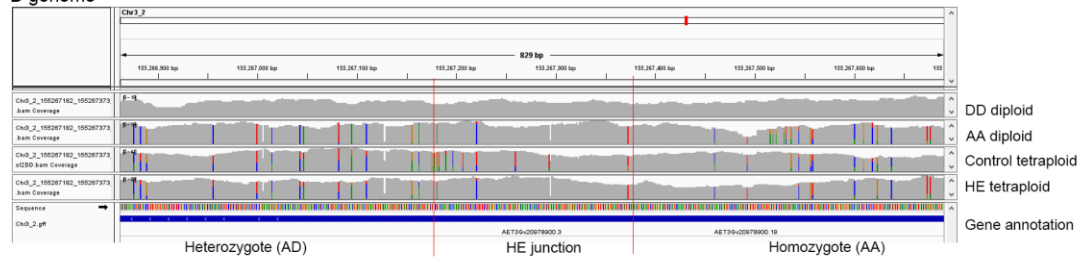

HE junction 32.

A genome

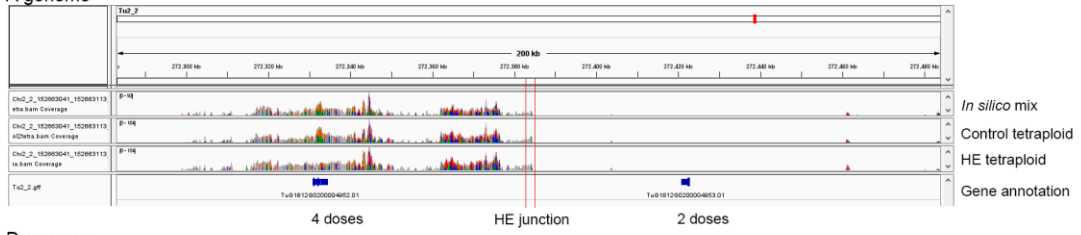

D genome

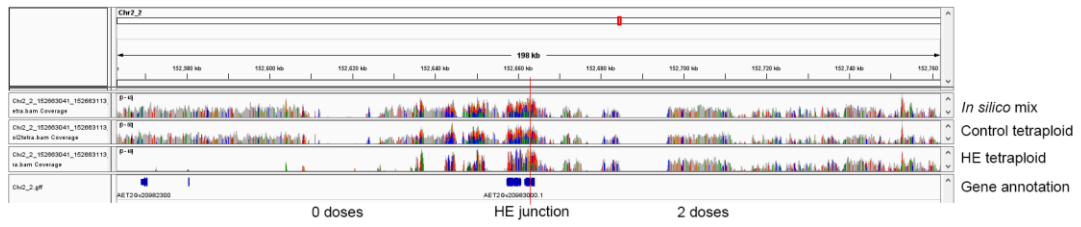

D genome

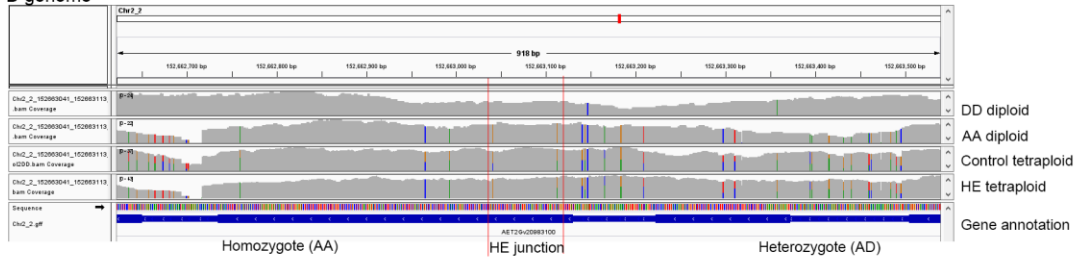

HE junction 33.

A genome

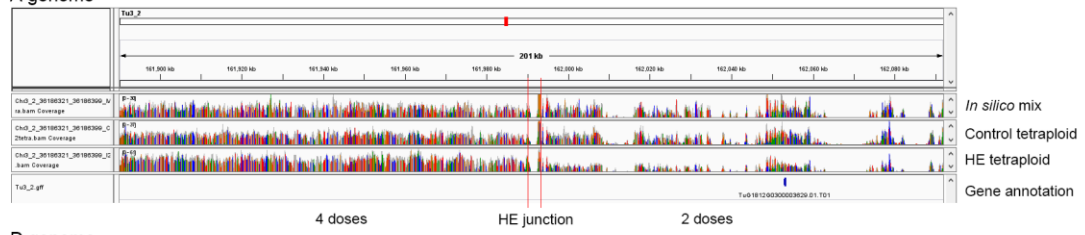

D genome

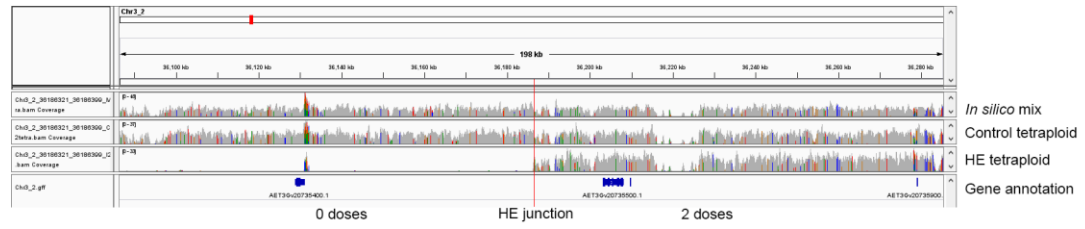

D genome

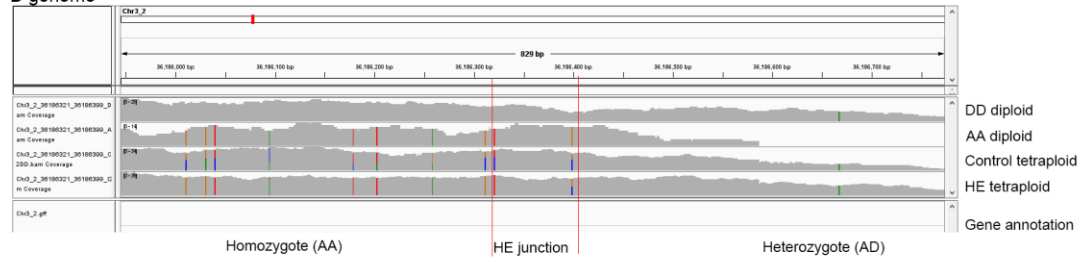

HE junction 34.

### A genome

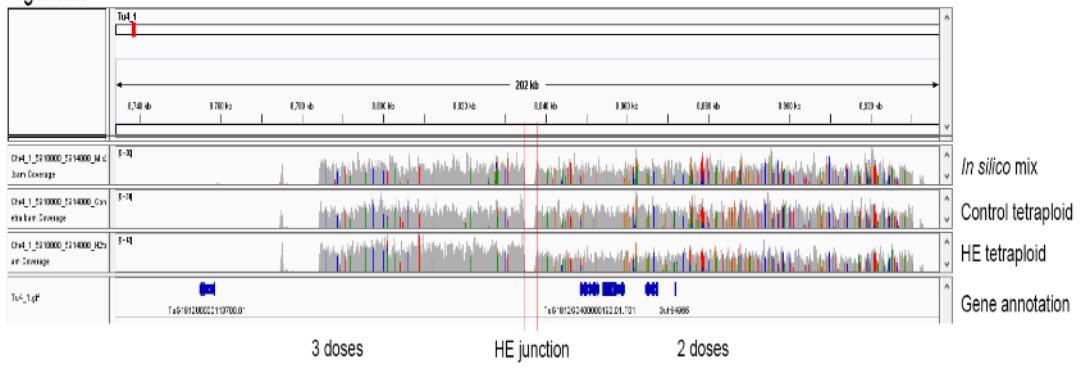

### D genome

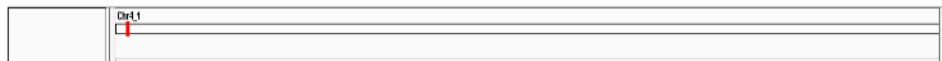

HE junction 35.

A genome

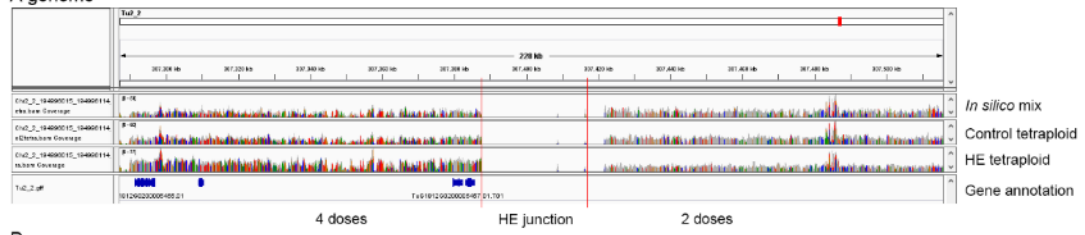

D genome

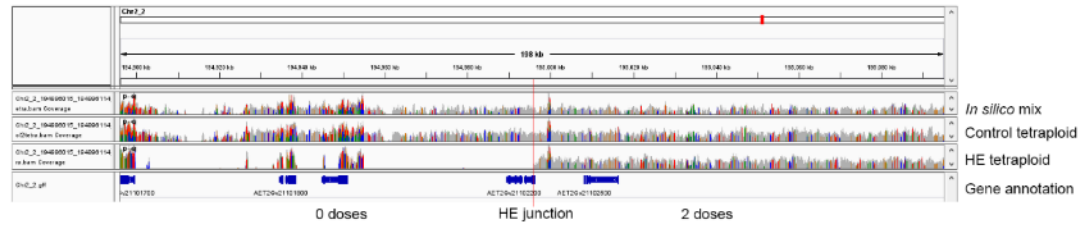

D genome

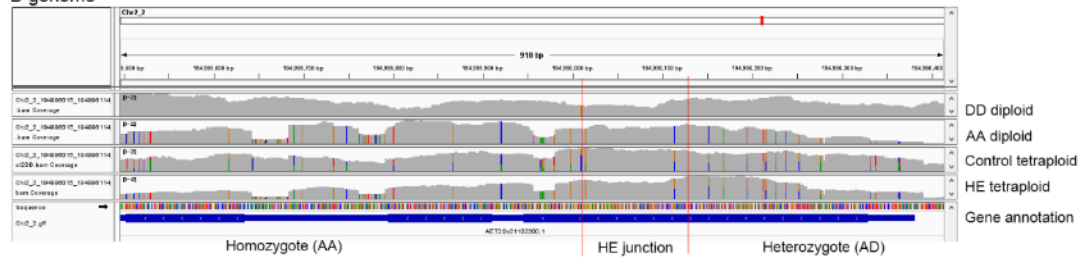

HE junction 36.

A genome

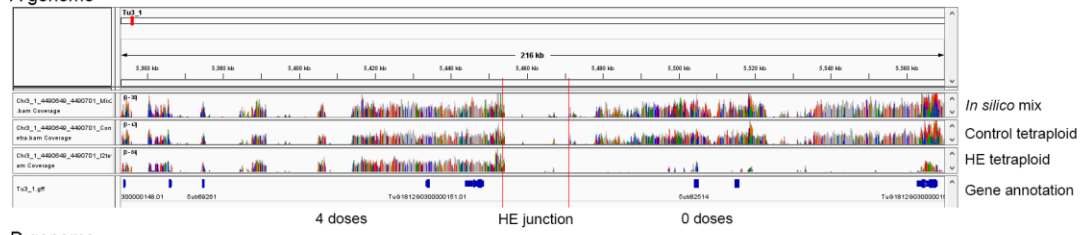

D genome

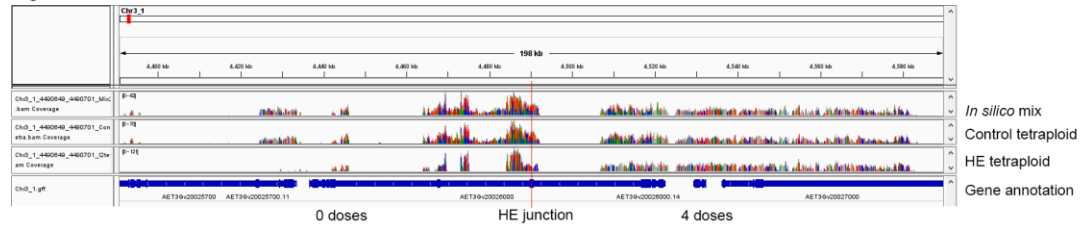

D genome

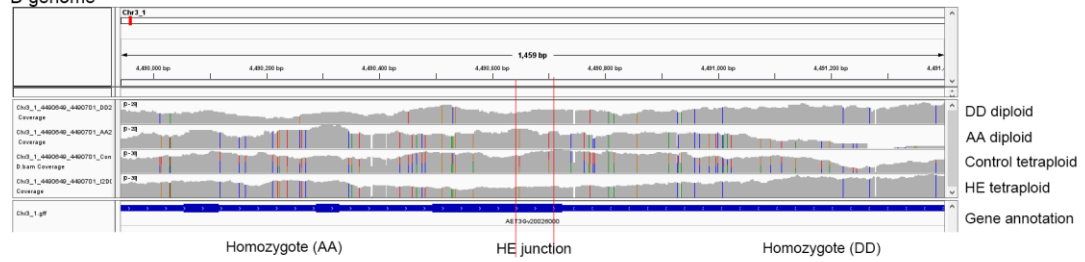

HE junction 37.

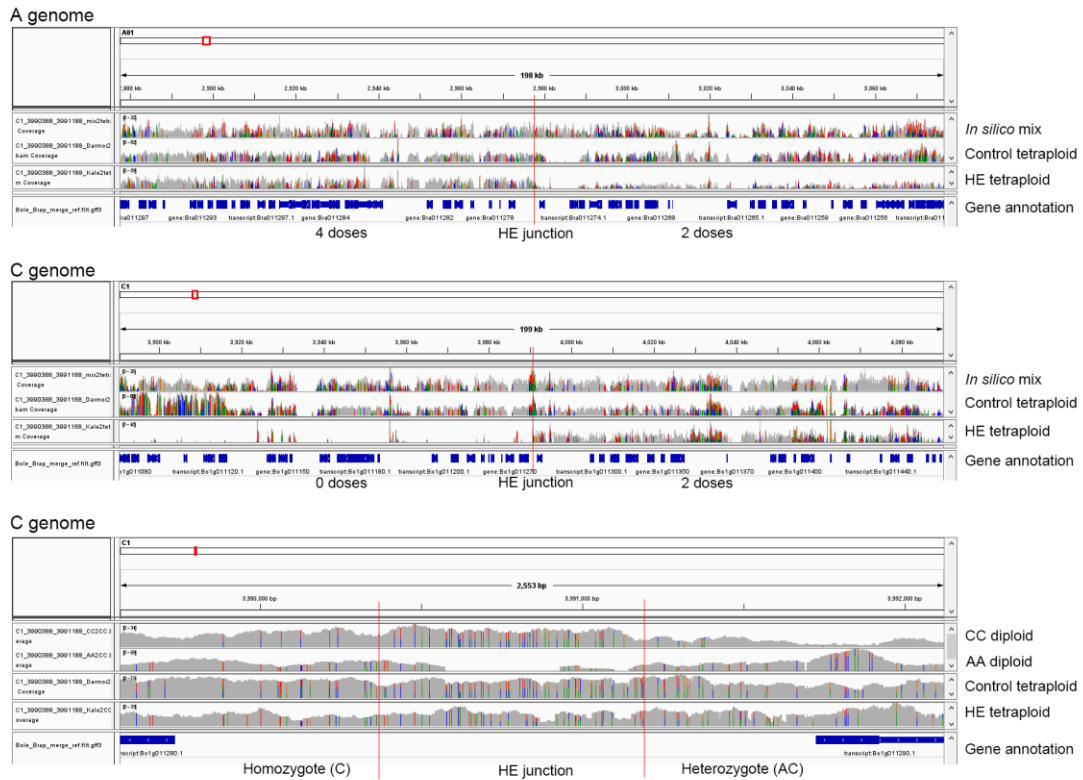

IGV panels of HE junction regions in *Brassica napus* (104 junctions). The top and middle panels show the sequencing depth around HE junctions in both *B. oleracea* (C) and *B. rapa* (A) genomes, respectively. Red lines indicate the position of HE junctions and genome dosages are shown on both sides of HE junction. The bottom panel shows the genotypes (homozygote or heterozygote) around HE junction (region between red lines) based on SNP genotyping.

A genome

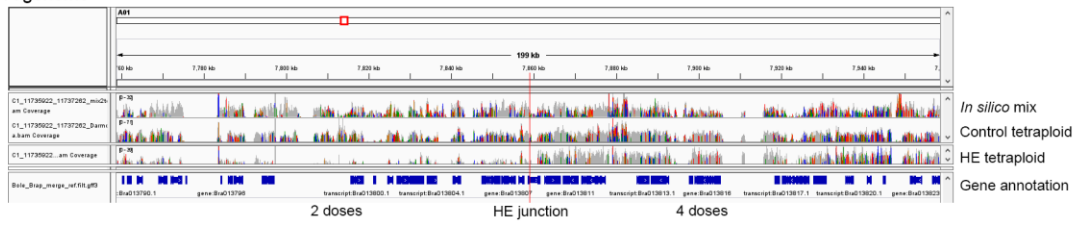

C genome

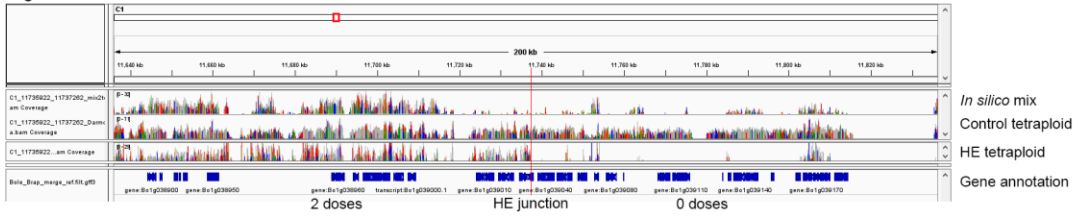

C genome

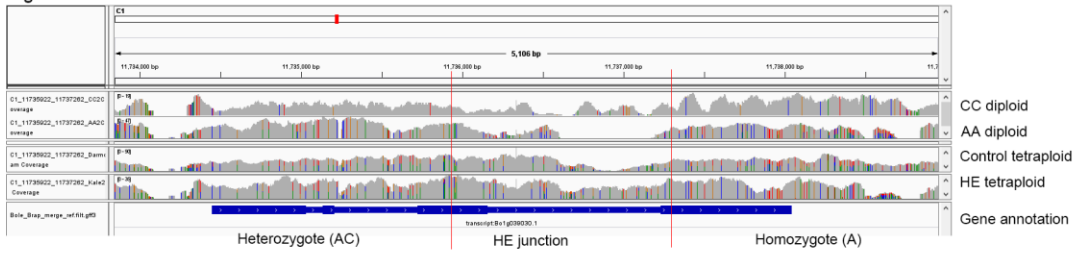

HE junction 2.



A genome

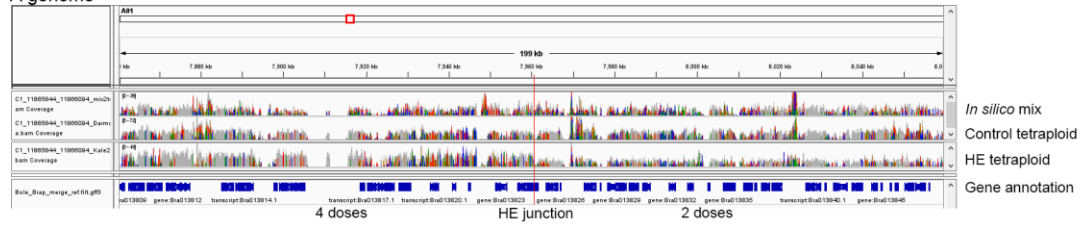

C genome

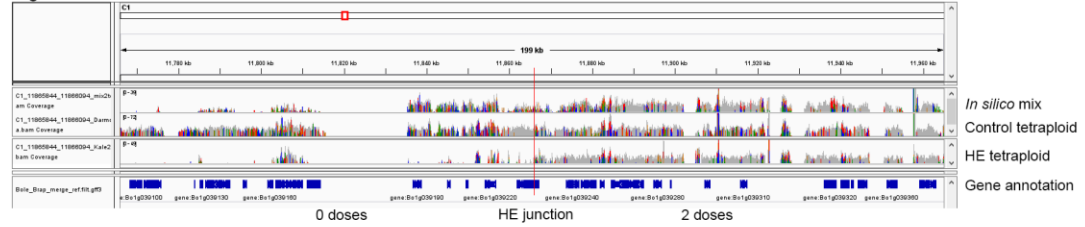

C genome

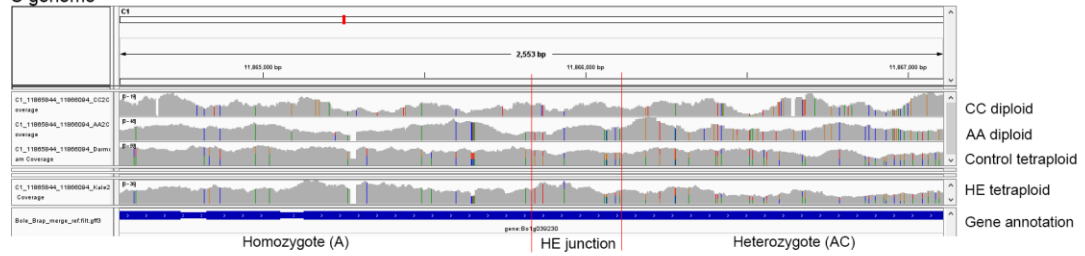

HE junction 3.

A genome

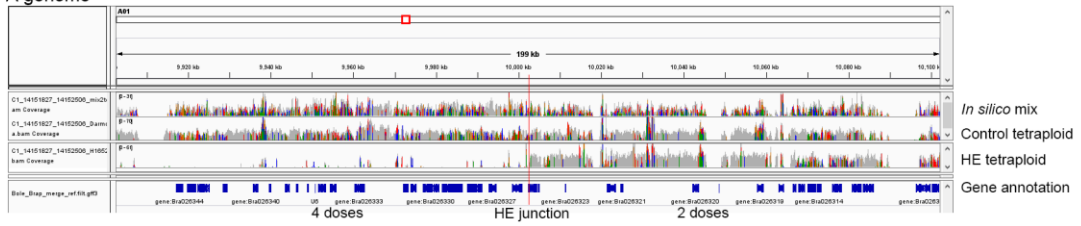

C genome

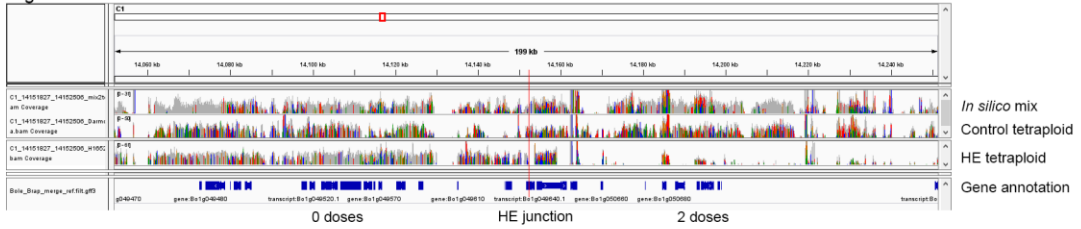

C genome

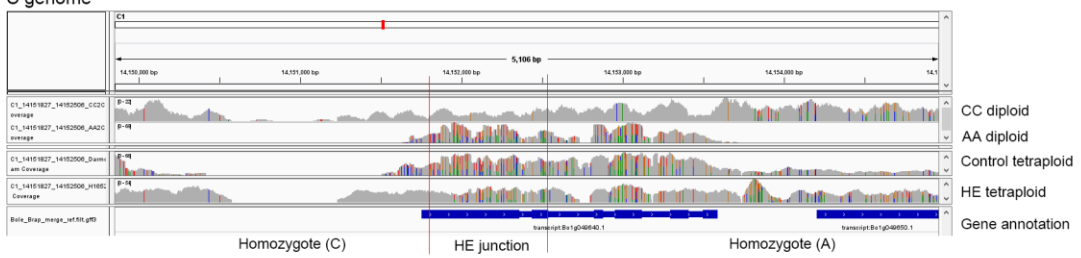

HE junction 4.

A genome

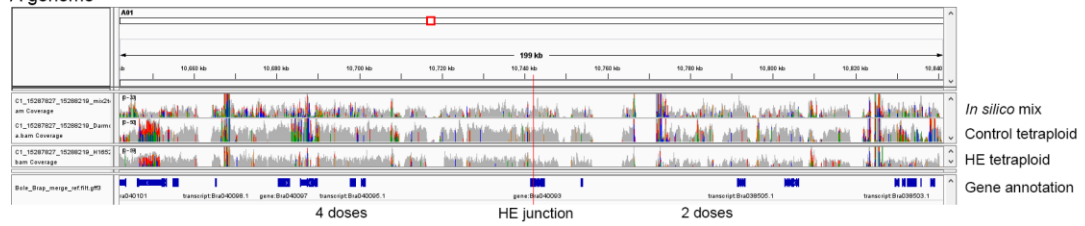

C genome

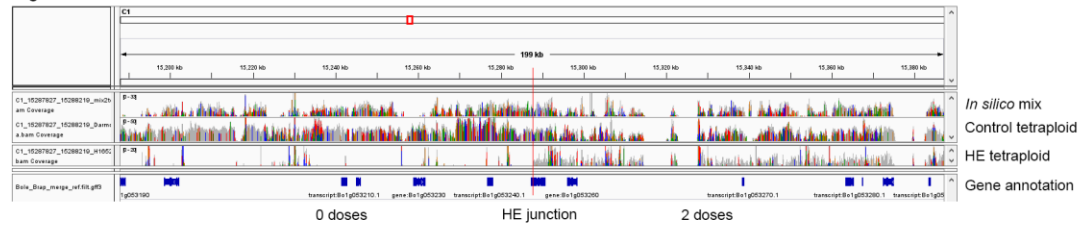

C genome

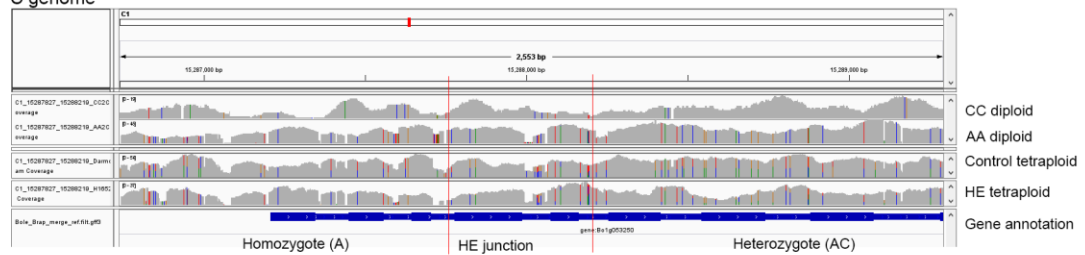

HE junction 5.

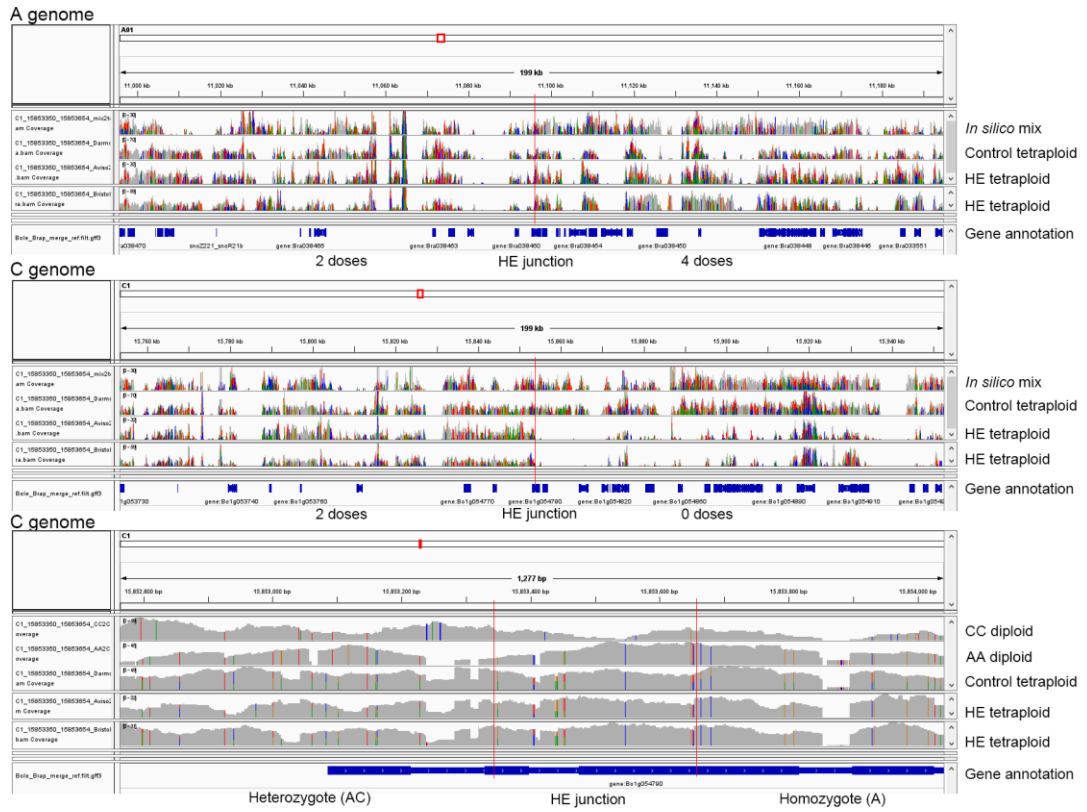

HE junction 6.

A genome

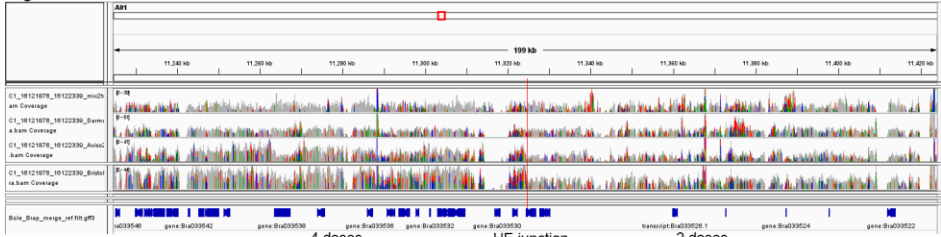

*In silico* mix  
Control tetraploid  
HE tetraploid  
HE tetraploid  
Gene annotation

C genome

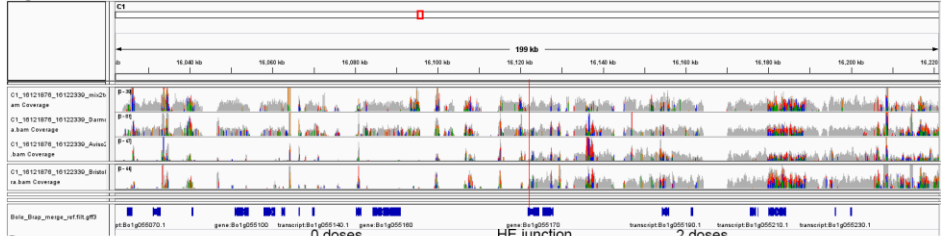

*In silico* mix  
Control tetraploid  
HE tetraploid  
HE tetraploid  
Gene annotation

C genome

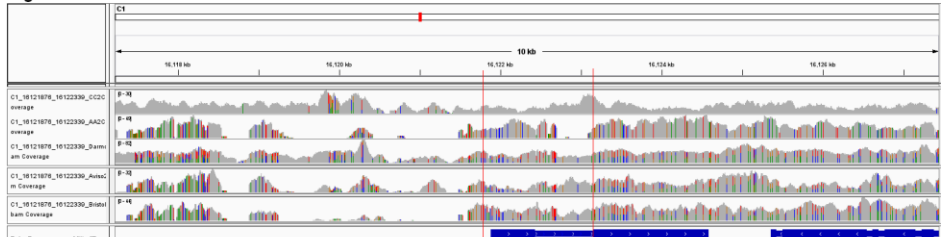

CC diploid  
AA diploid  
Control tetraploid  
HE tetraploid  
HE tetraploid  
Gene annotation

Homozygote (A)                      HE junction                      Heterozygote (AC)

HE junction 7.

A genome

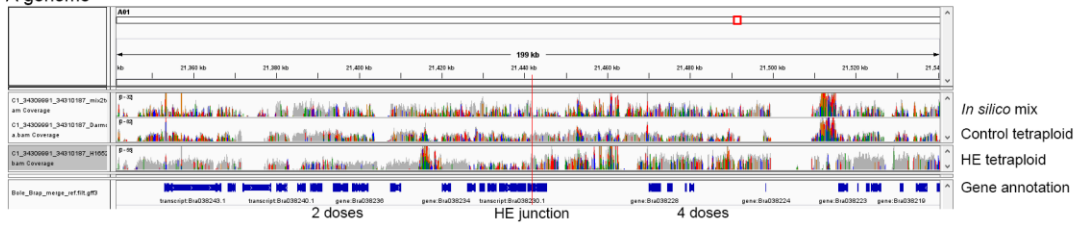

C genome

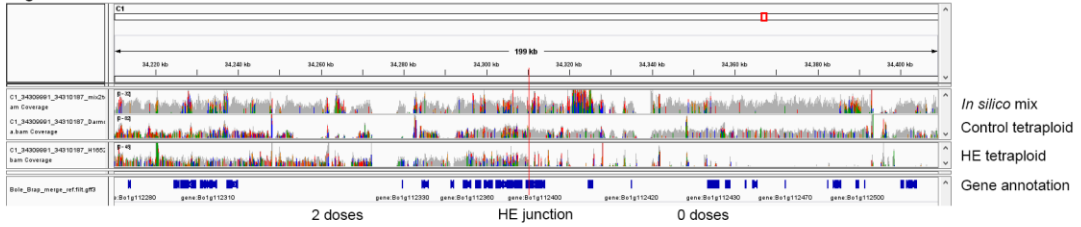

C genome

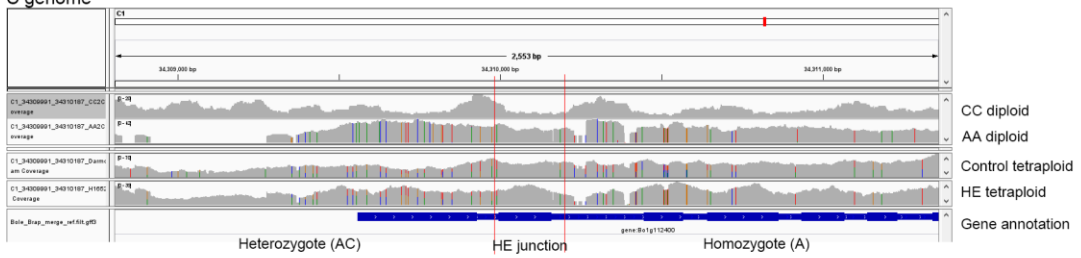

HE junction 8.

A genome

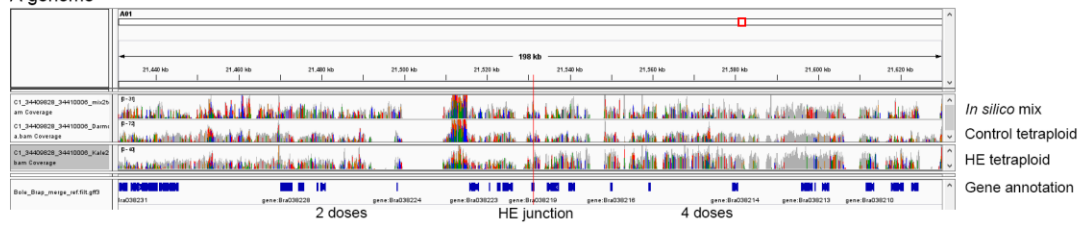

C genome

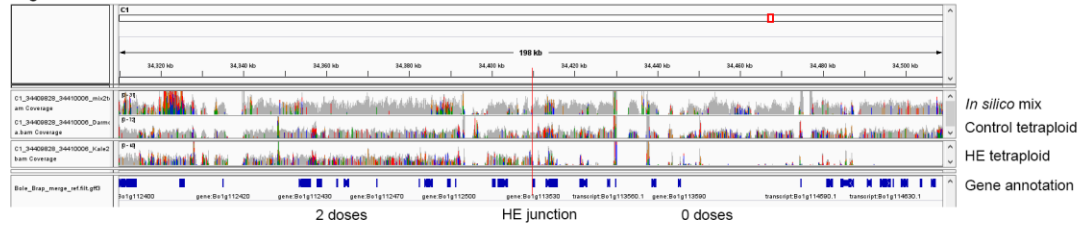

C genome

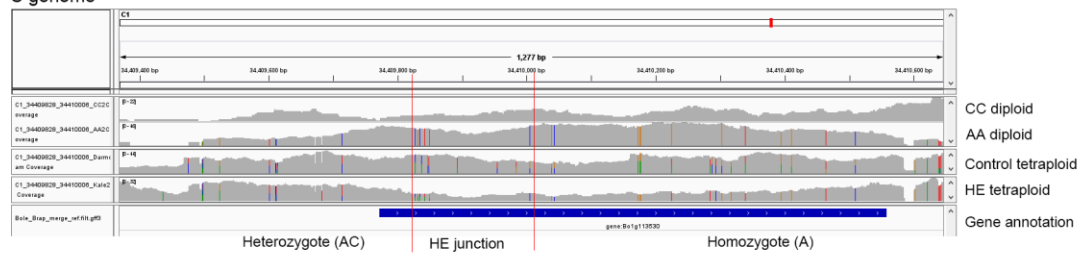

HE junction 9.

A genome

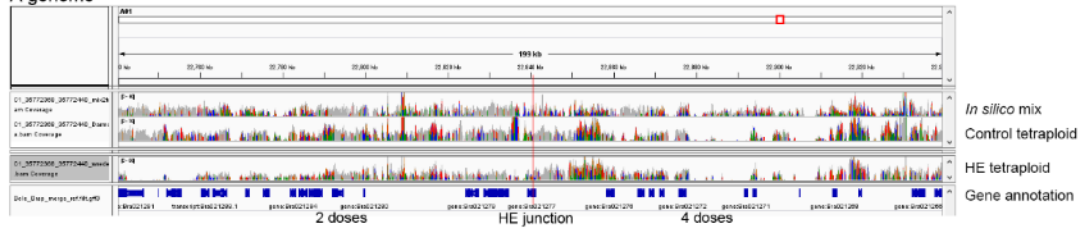

C genome

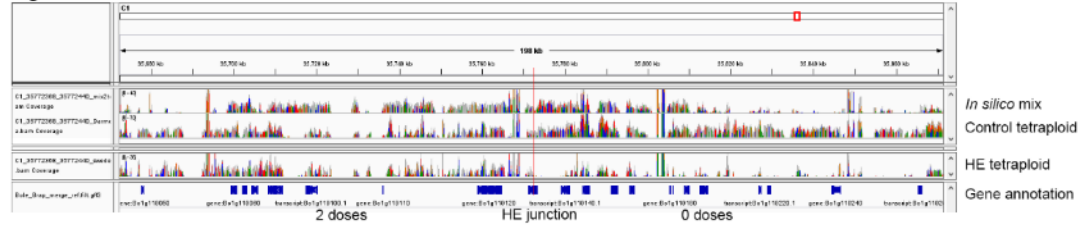

C genome

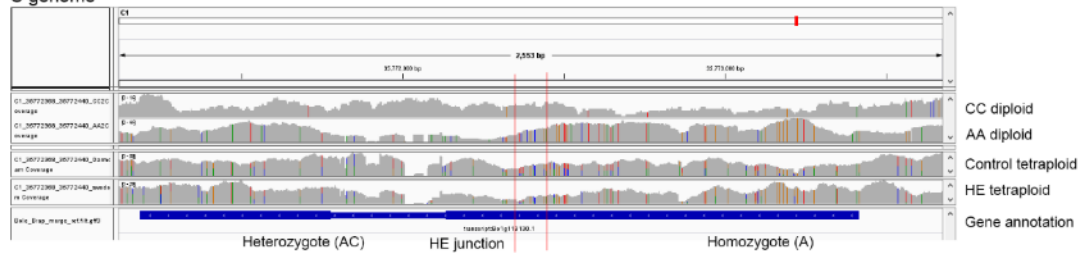

HE junction 10.



A genome

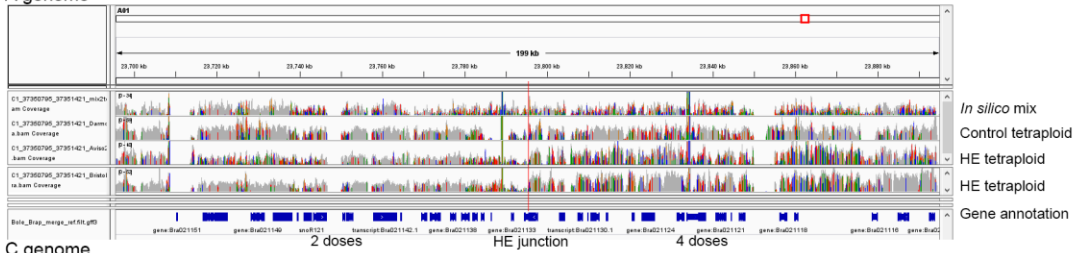

C genome

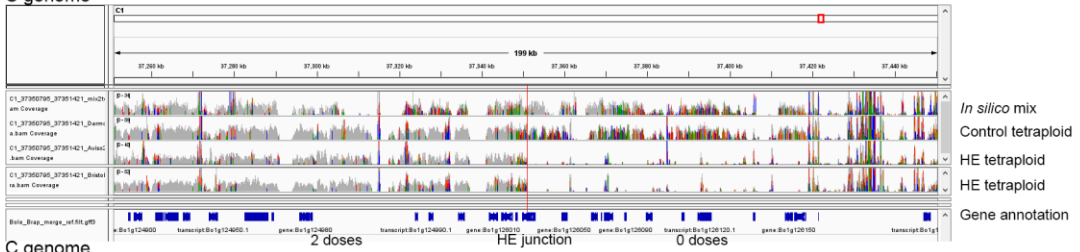

C genome

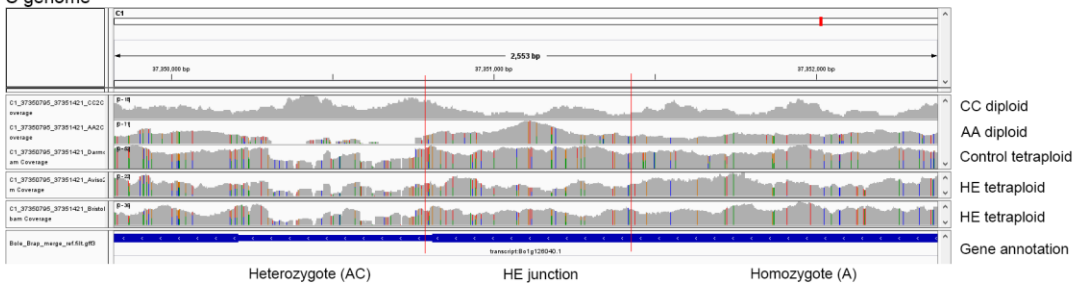

HE junction 11.

A genome

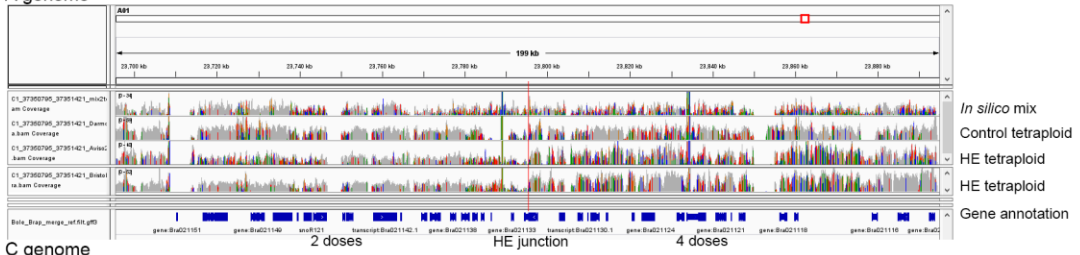

C genome

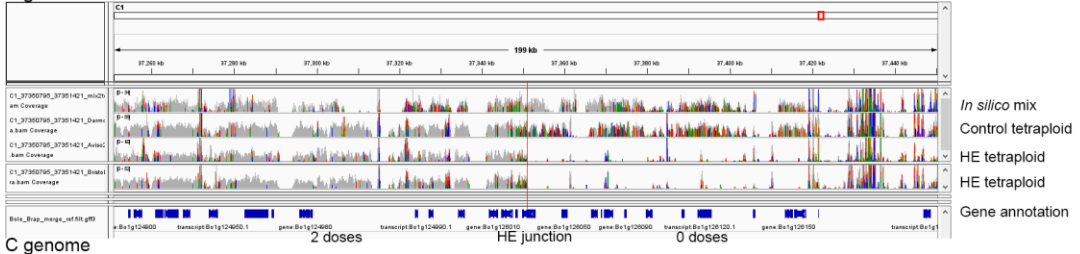

C genome

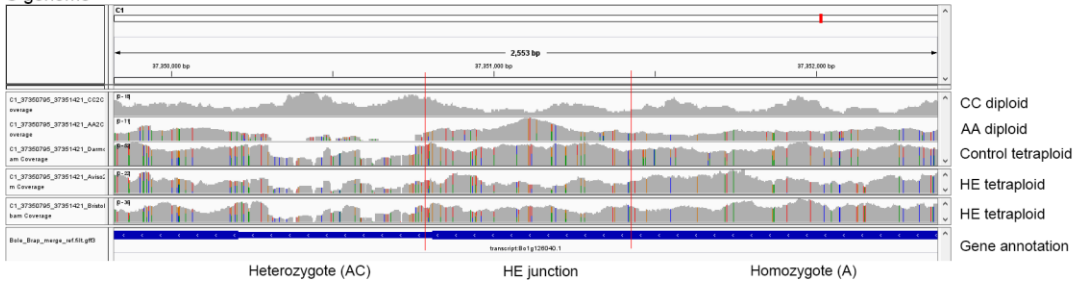

HE junction 12.

A genome

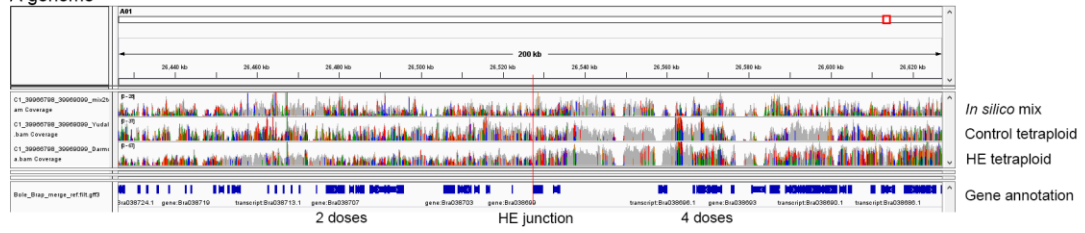

C genome

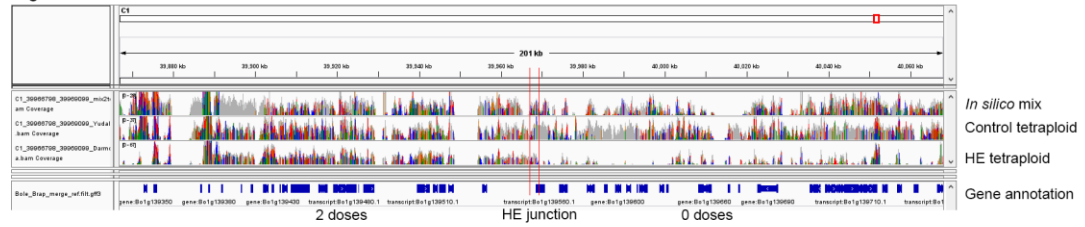

C genome

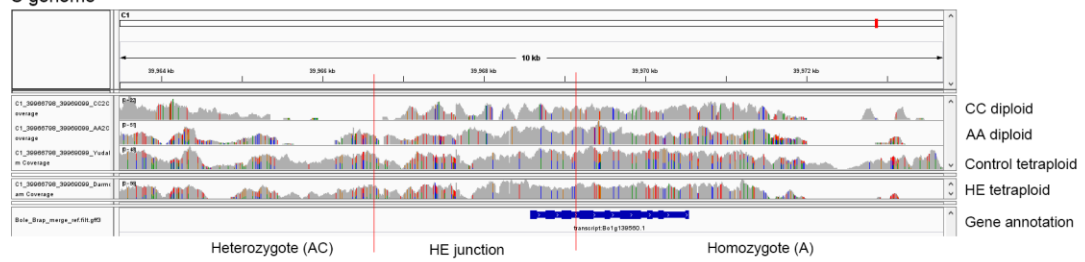

HE junction 13.

A genome

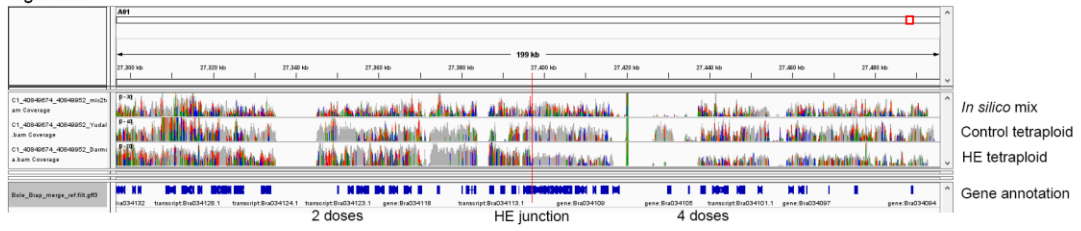

C genome

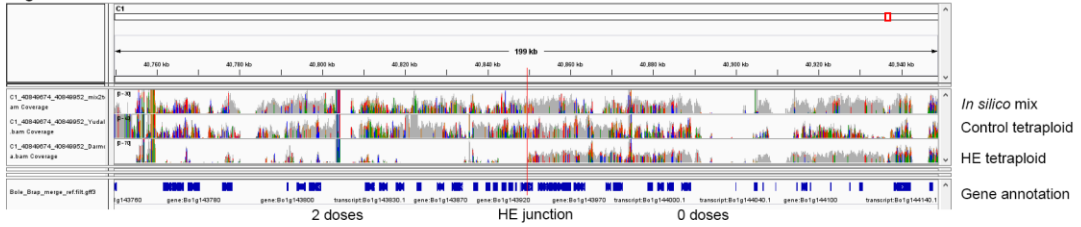

C genome

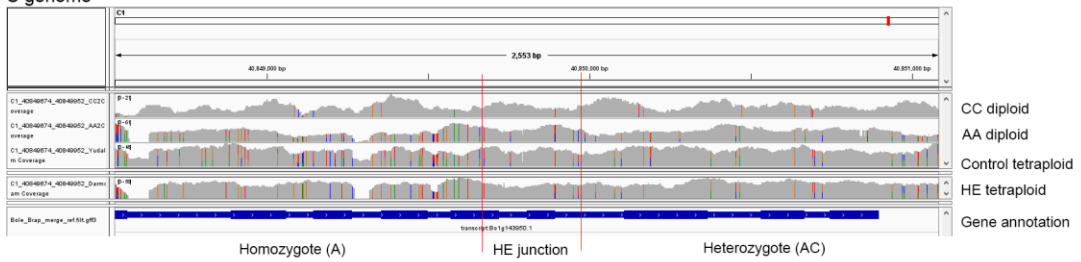

HE junction 14.

A genome

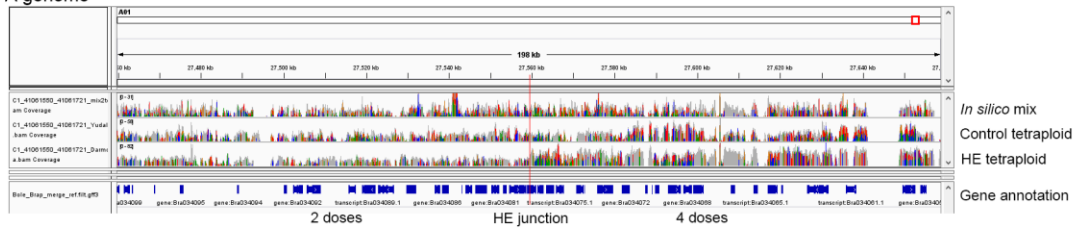

C genome

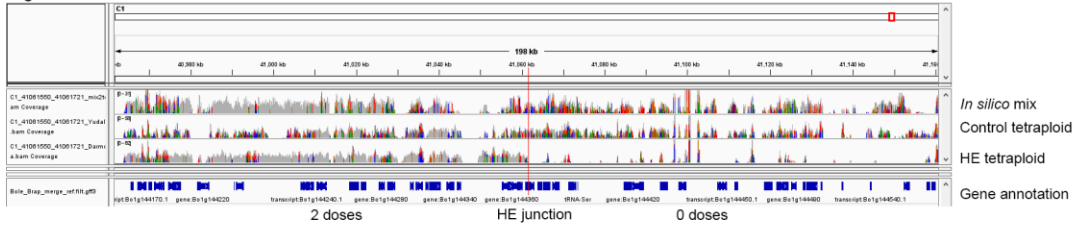

C genome

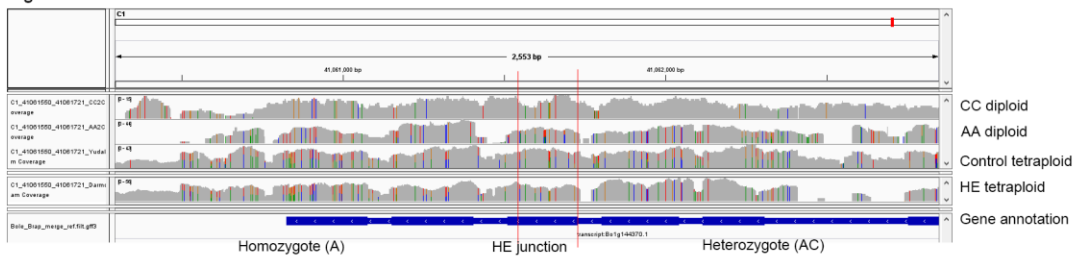

HE junction 15.

A genome

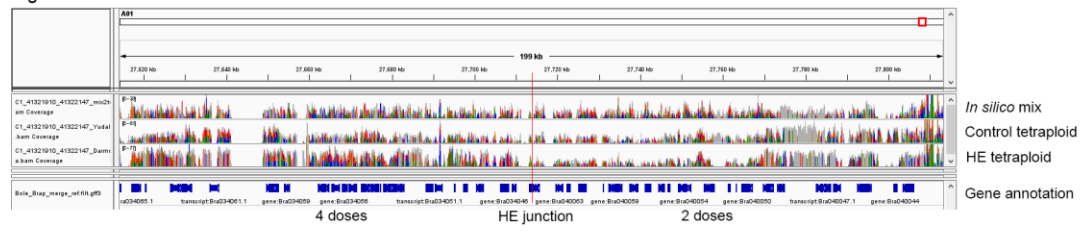

C genome

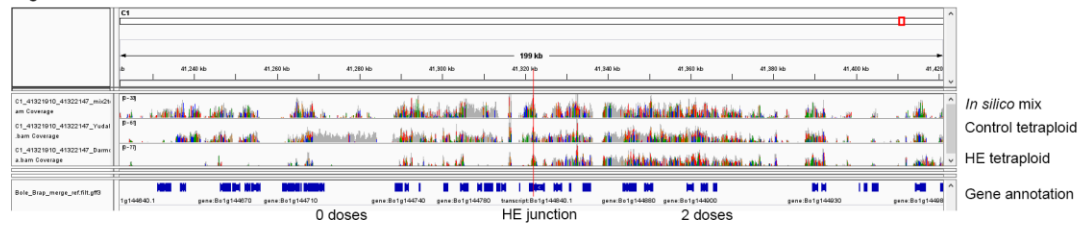

C genome

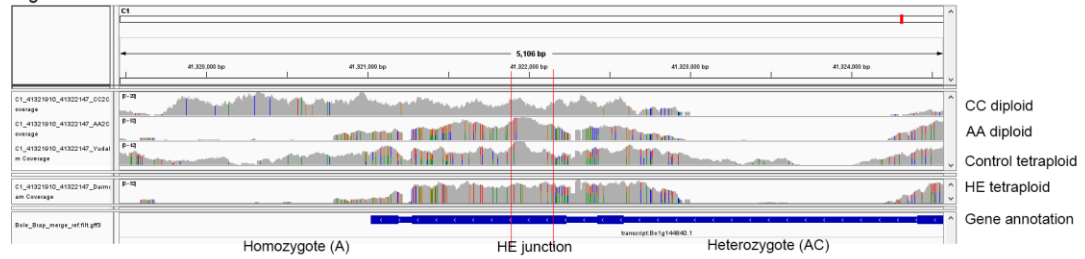

HE junction 16.

A genome

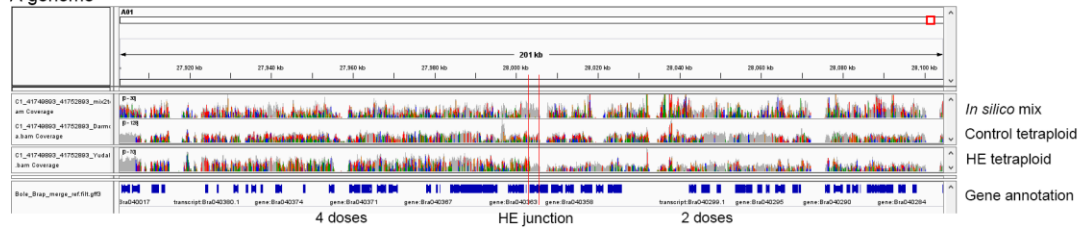

C genome

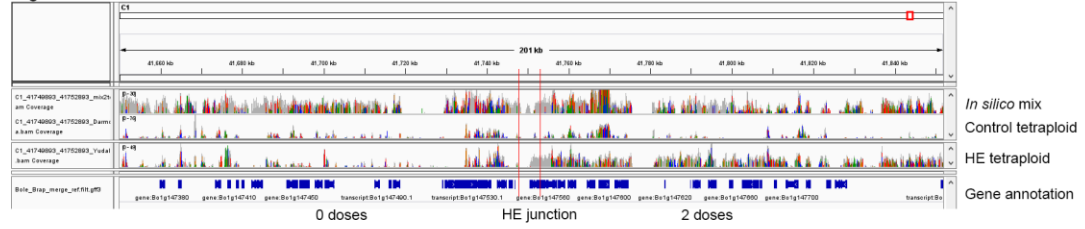

C genome

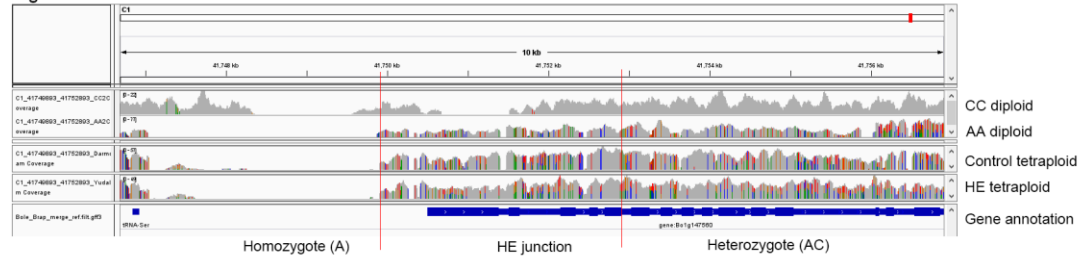

HE junction 17.

C genome

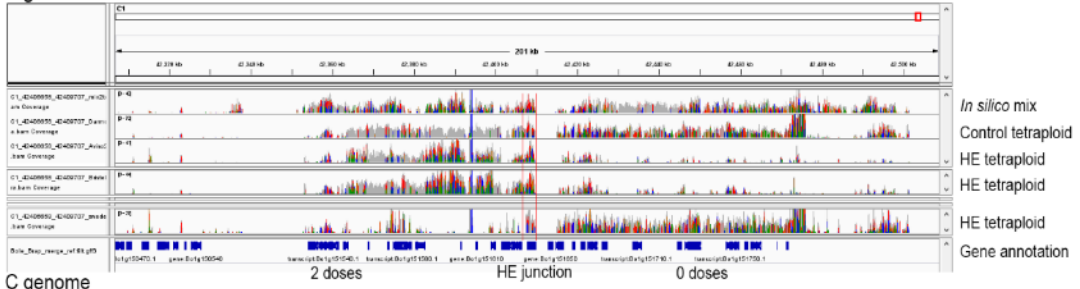

C genome

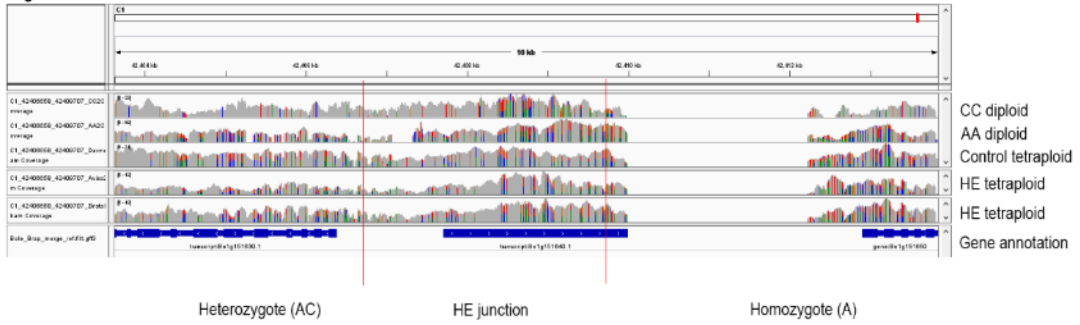

HE junction 18.



C genome

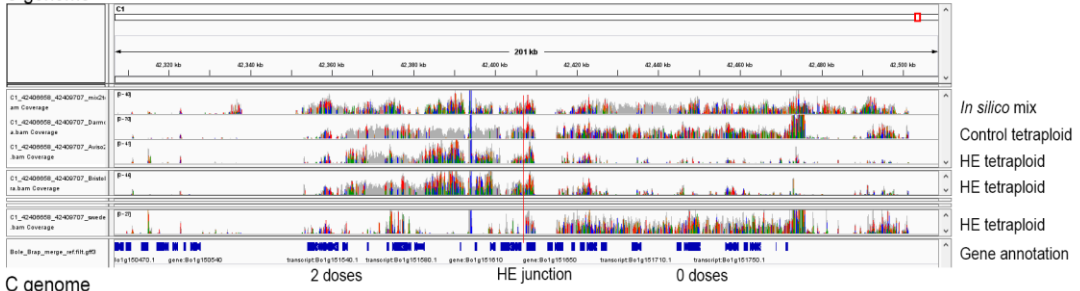

C genome

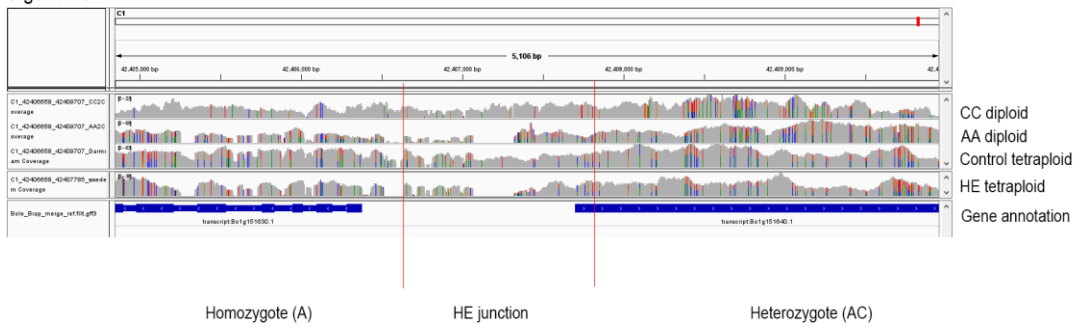

HE junction 19.

A genome

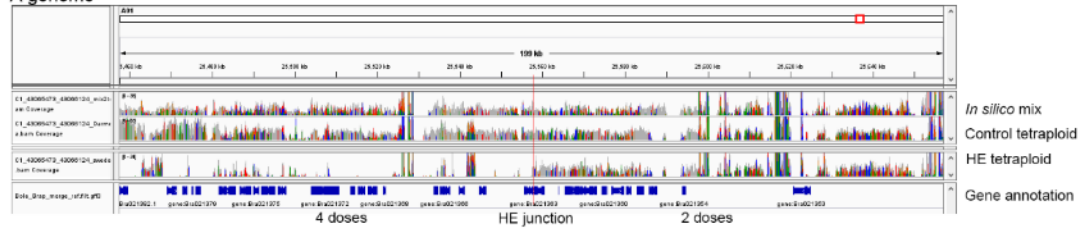

C genome

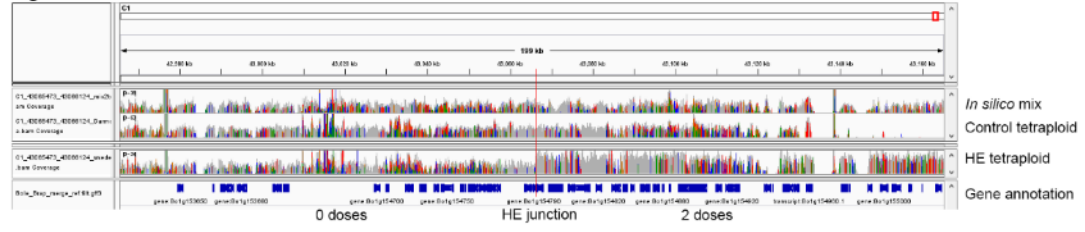

C genome

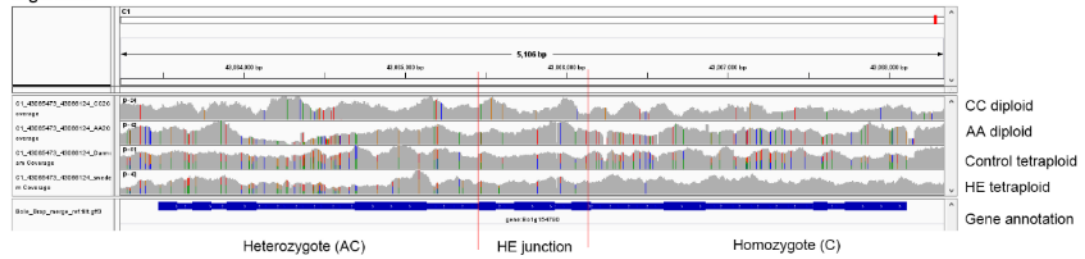

HE junction 20.

A genome

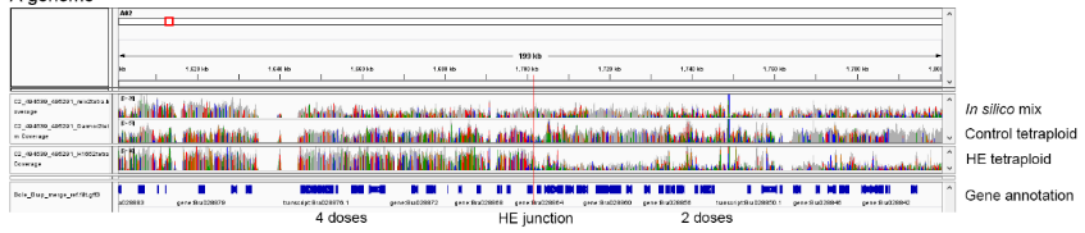

C genome

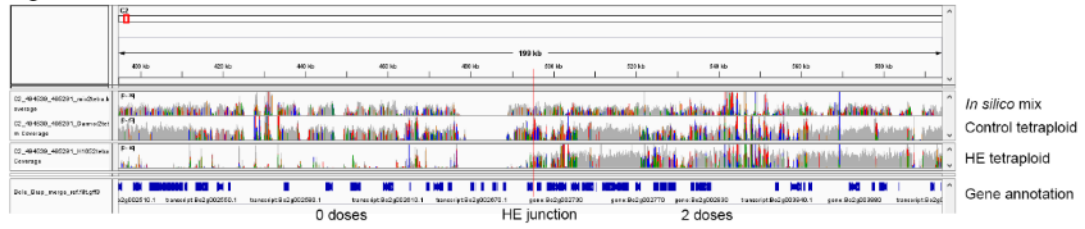

C genome

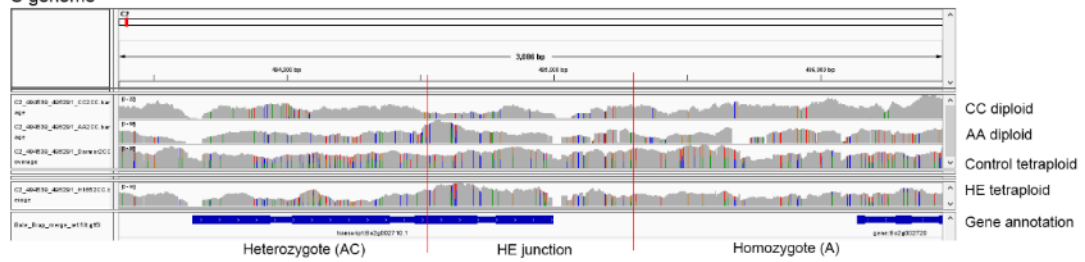

HE junction 21.

A genome

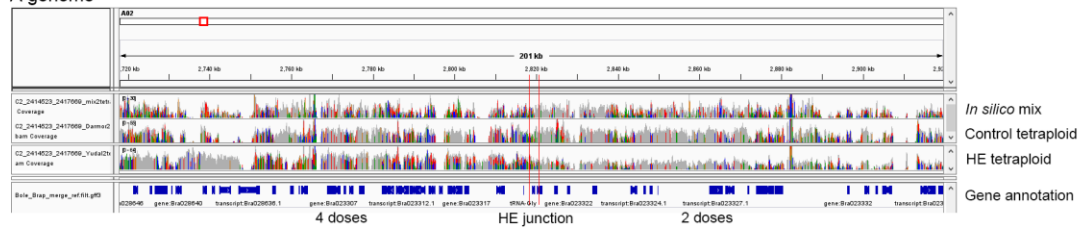

C genome

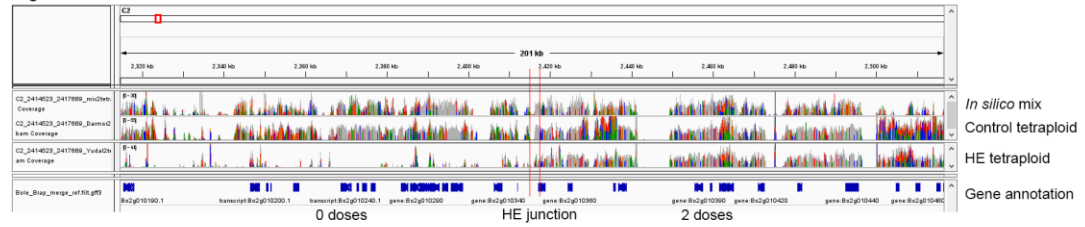

C genome

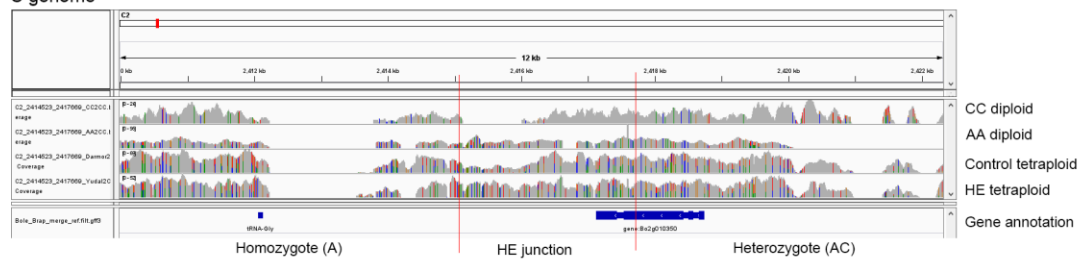

HE junction 22.

A genome

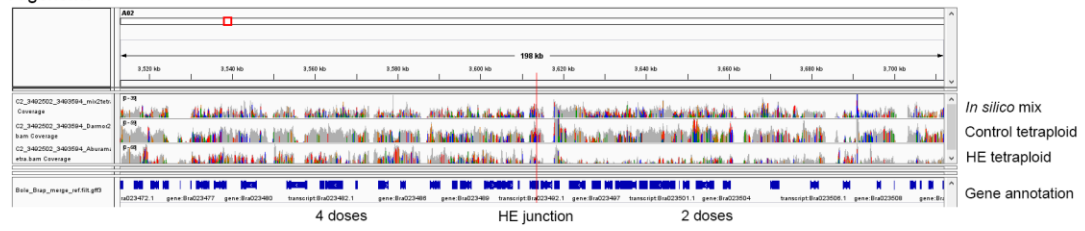

C genome

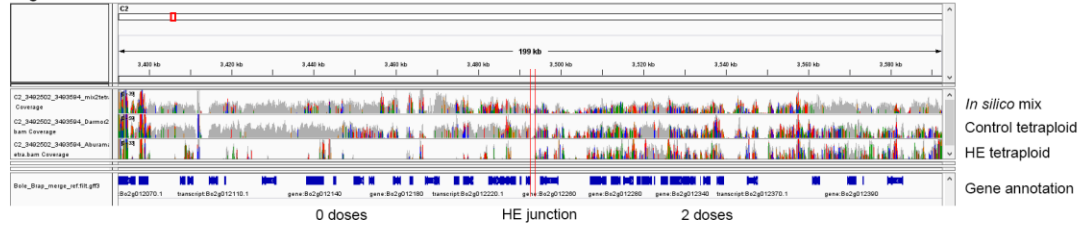

C genome

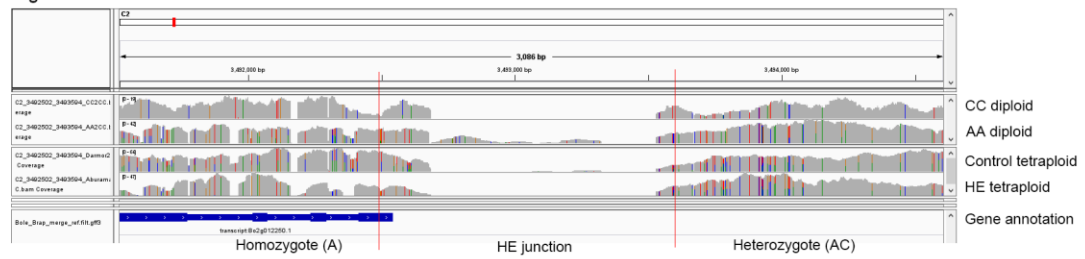

HE junction 23.

A genome

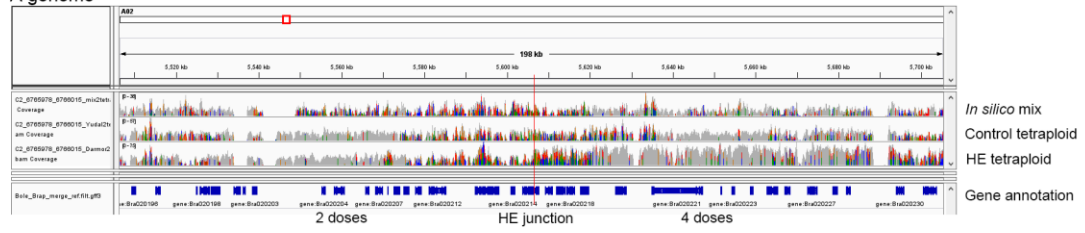

C genome

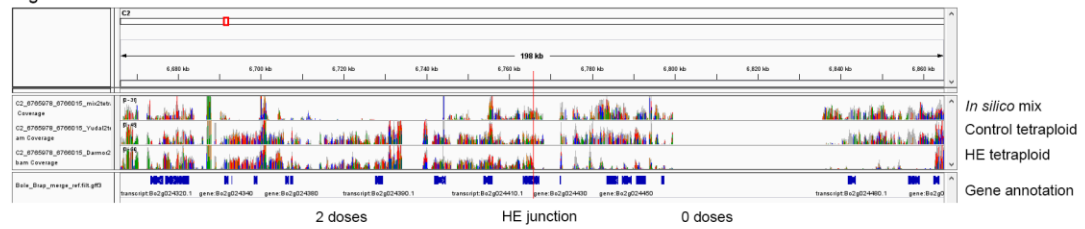

C genome

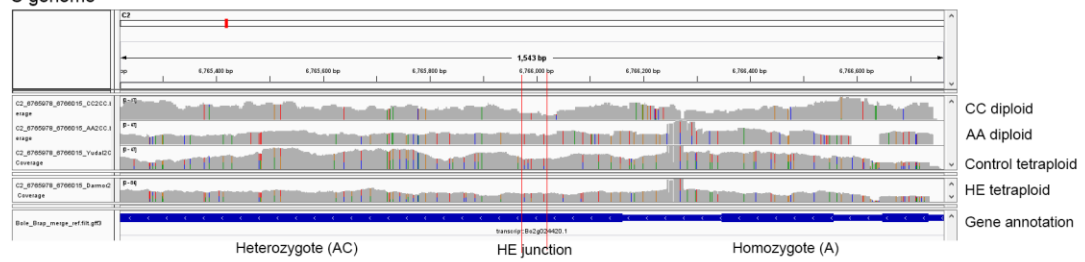

HE junction 24.

A genome

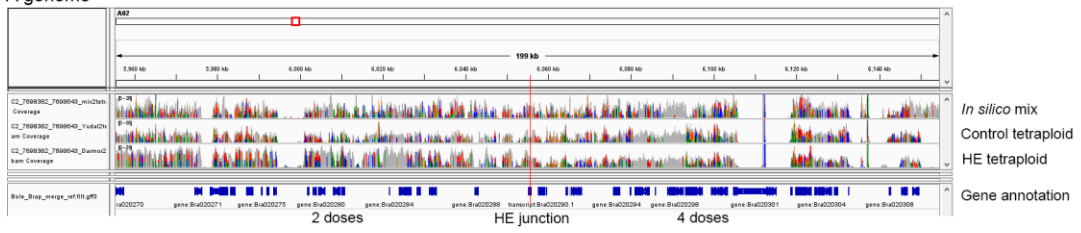

C genome

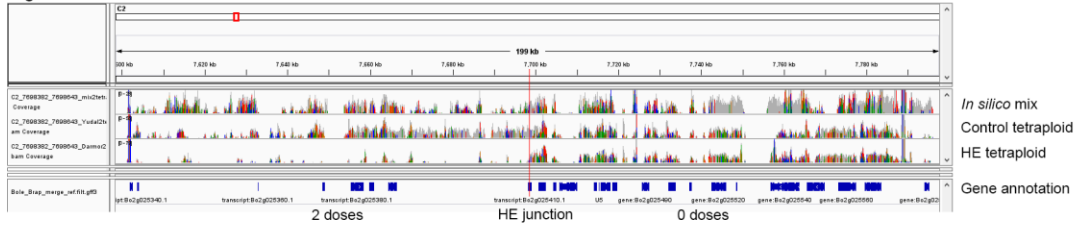

C genome

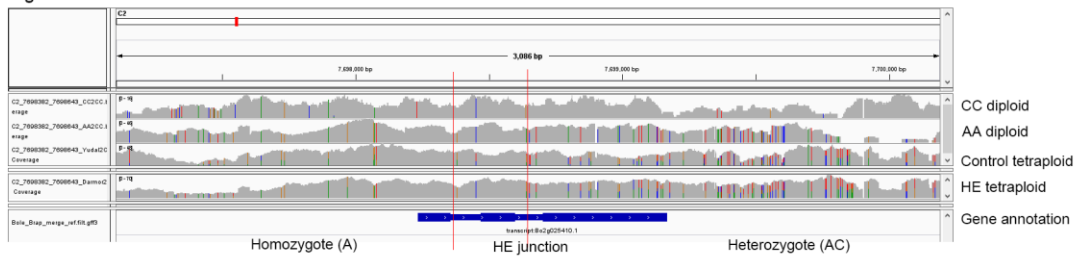

HE junction 25.

A genome

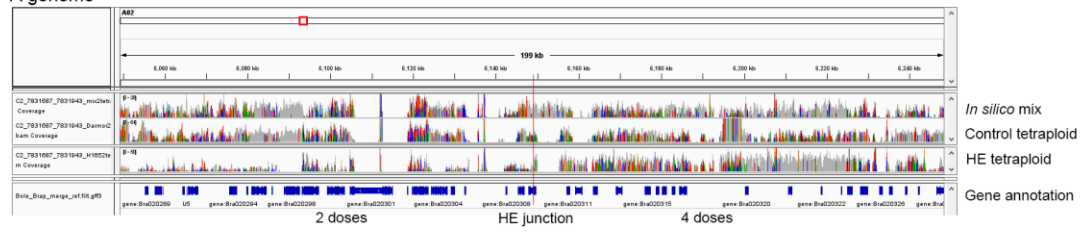

C genome

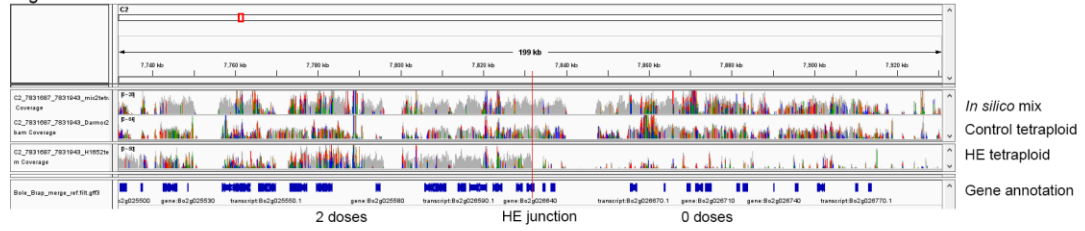

C genome

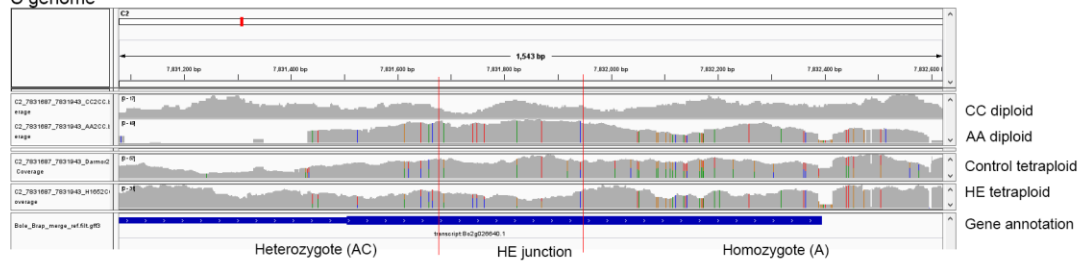

HE junction 26.



A genome

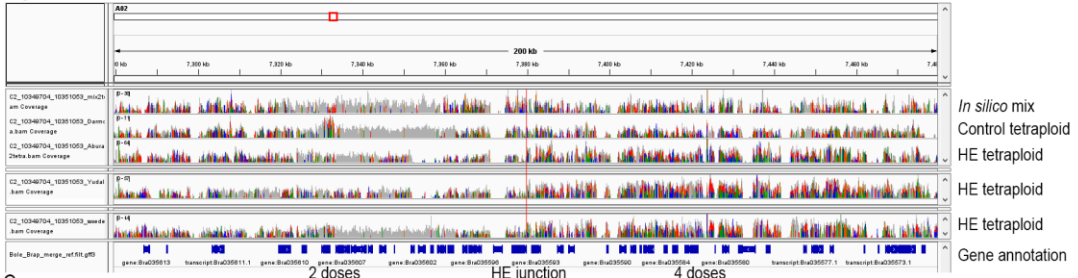

C genome

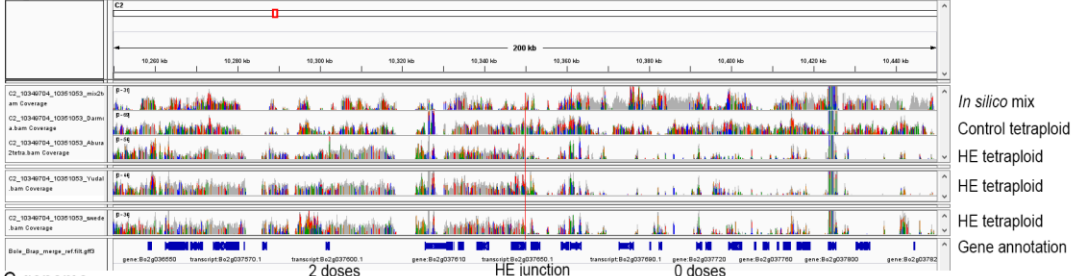

C genome

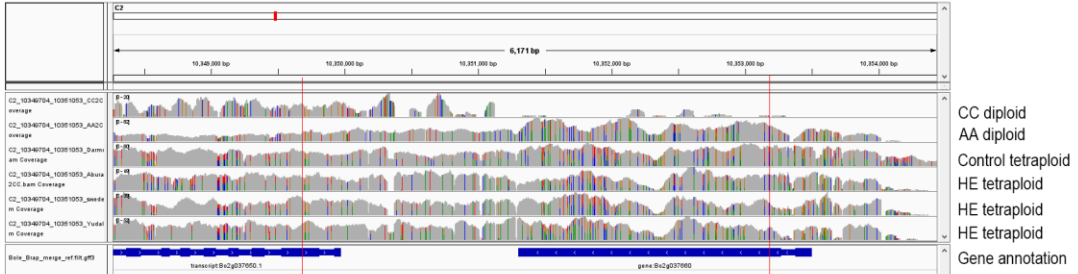

Heterozygote (AC)

HE junction

Homozygote (A)

HE junction 27.

A genome

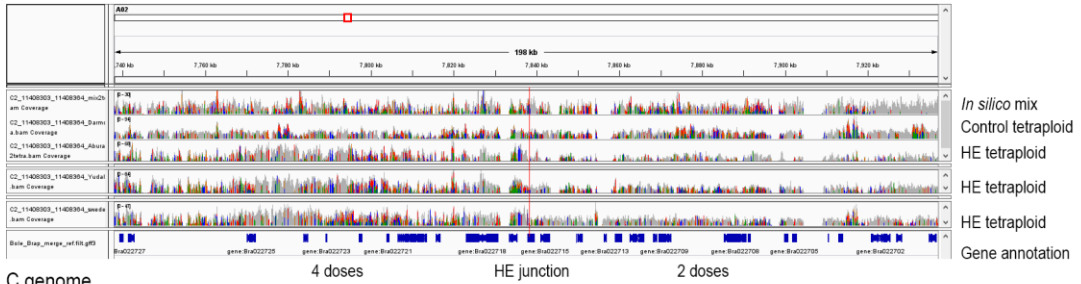

C genome

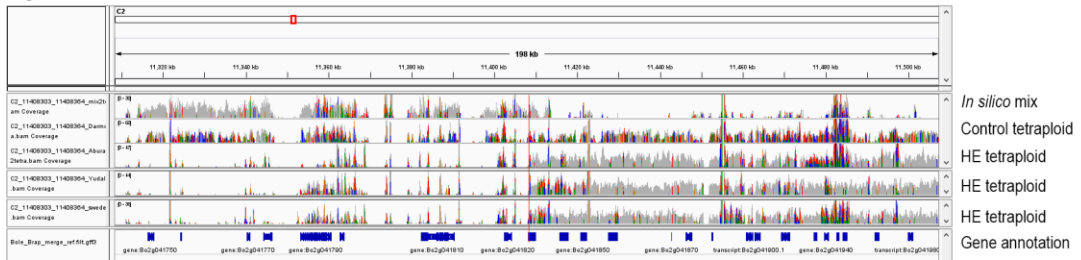

C genome

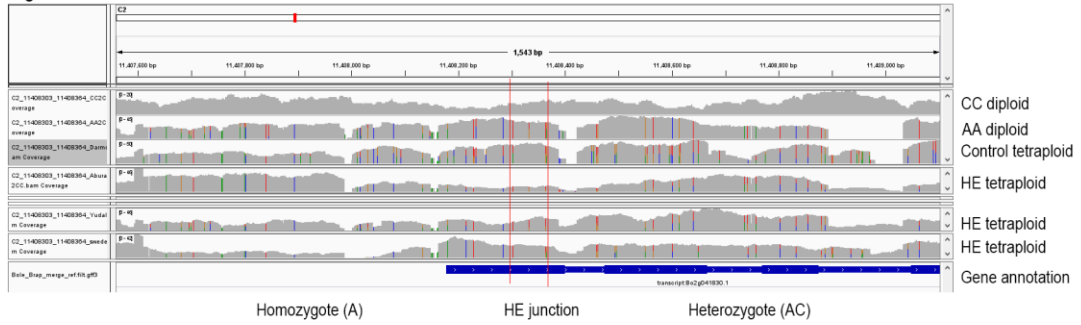

HE junction 28.

A genome

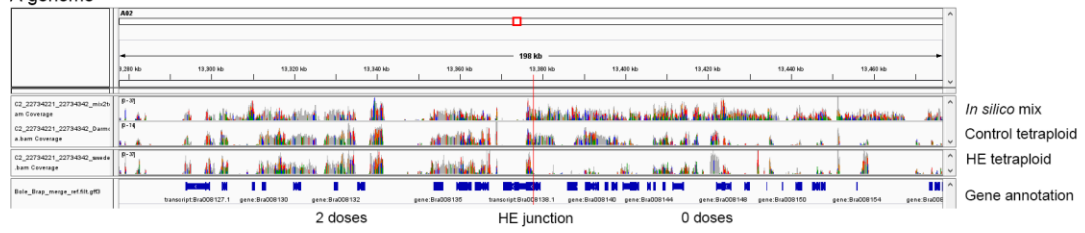

C genome

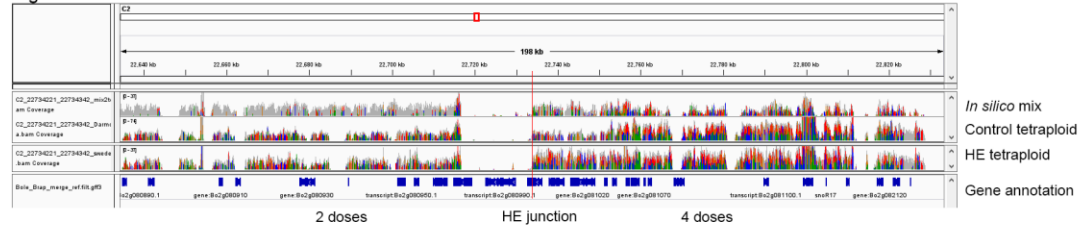

C genome

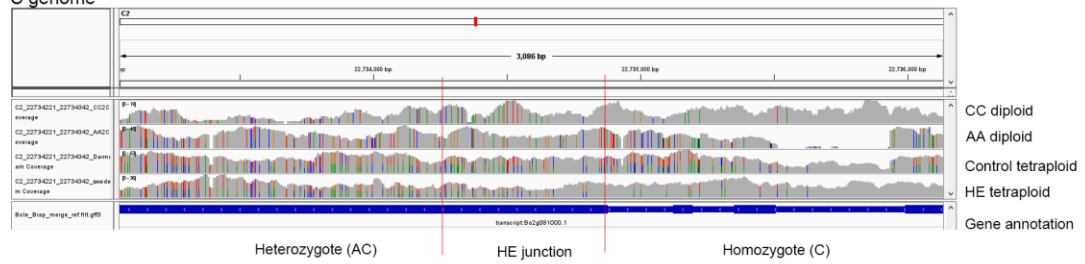

HE junction 29.

A genome

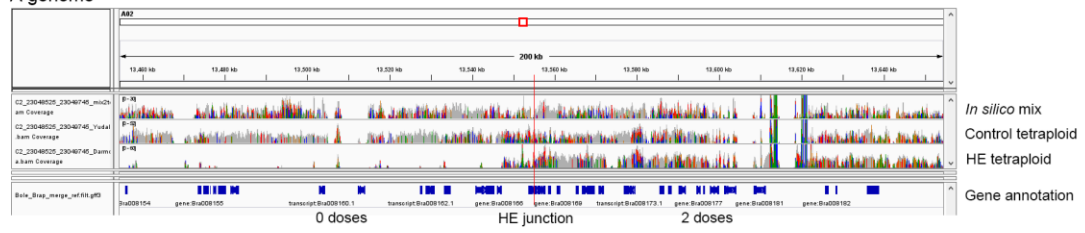

C genome

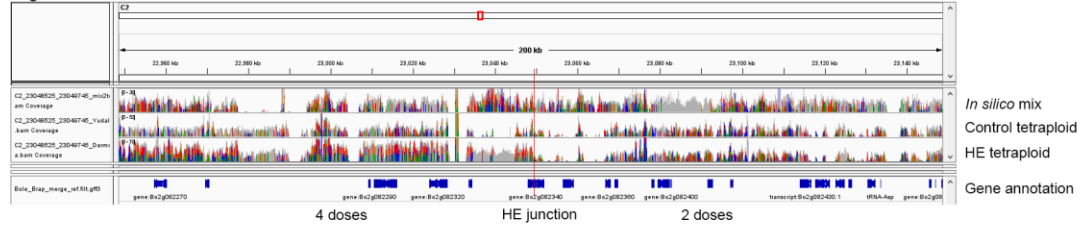

C genome

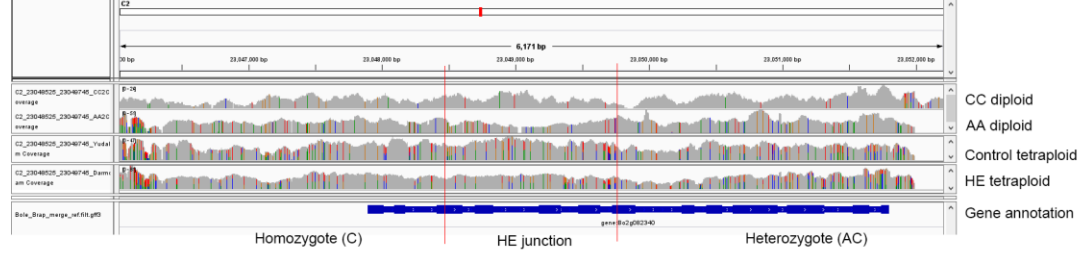

HE junction 30.

A genome

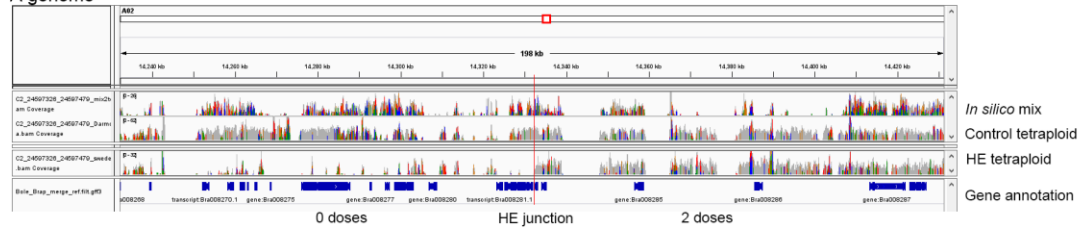

C genome

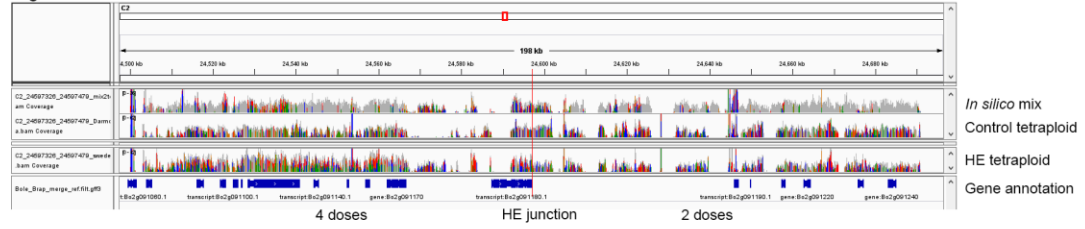

C genome

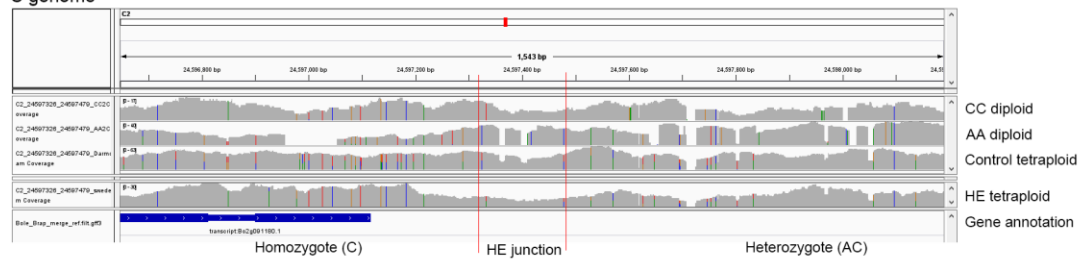

HE junction 31.

A genome

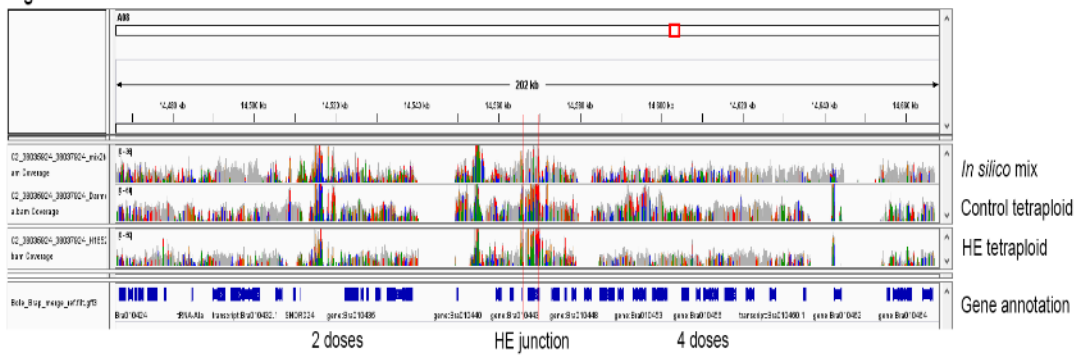

C genome

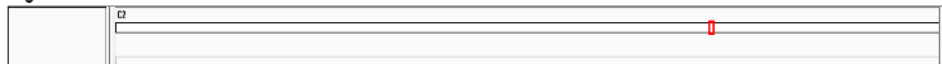

HE junction 32.

A genome

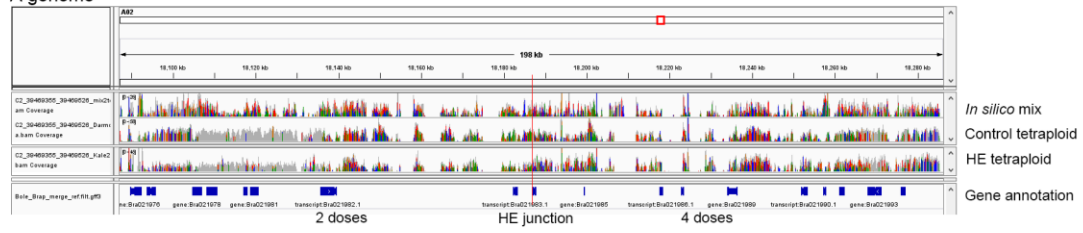

C genome

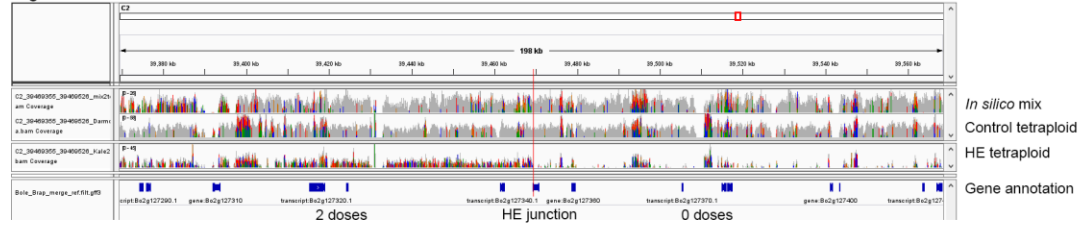

C genome

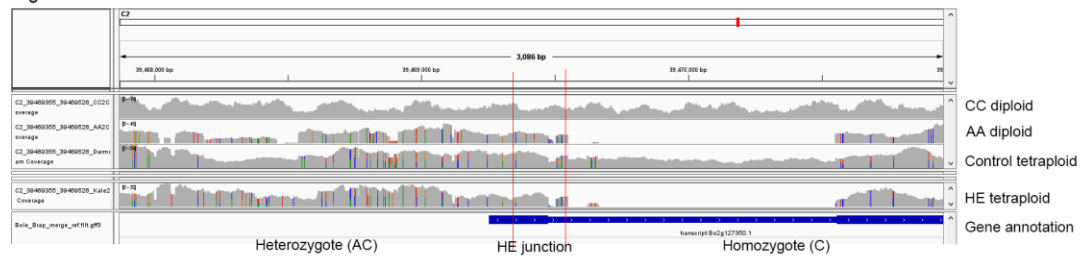

HE junction 33.

A genome

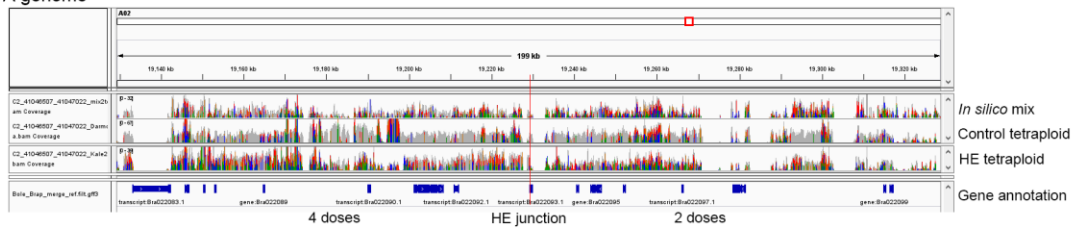

C genome

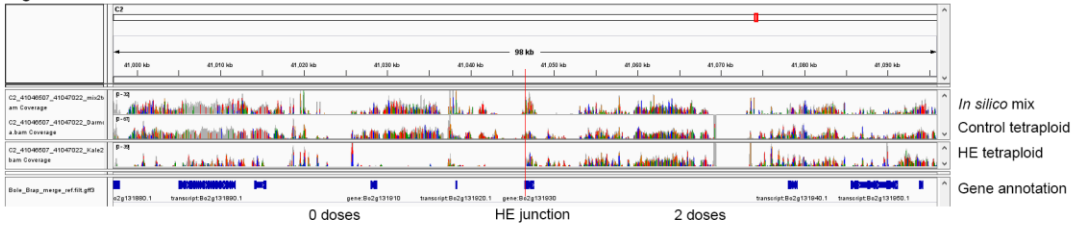

C genome

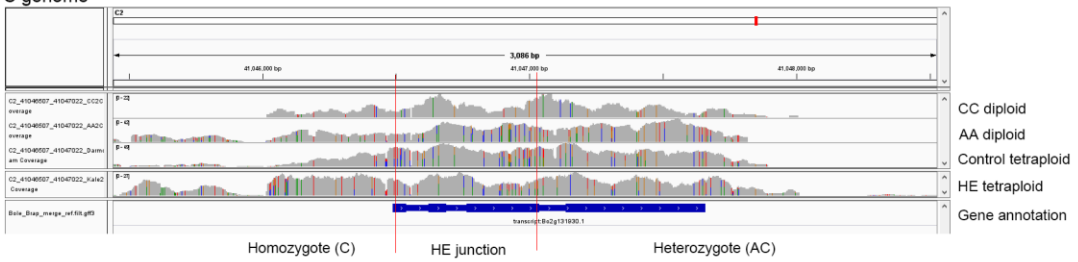

HE junction 34.



A genome

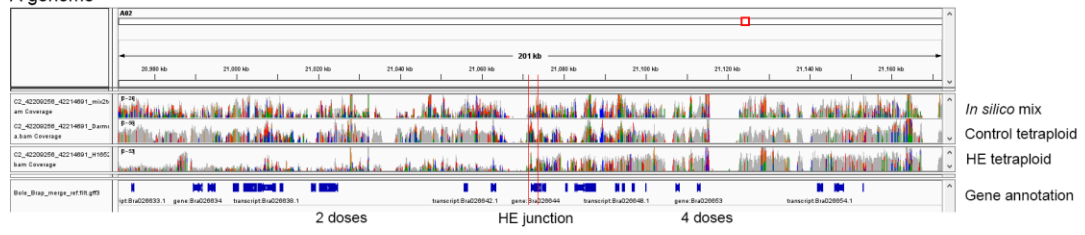

C genome

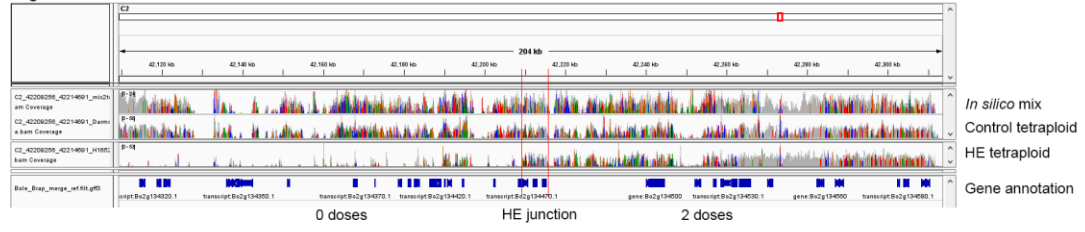

C genome

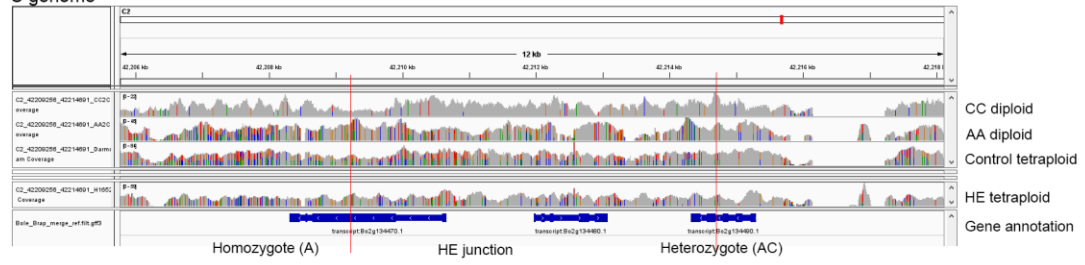

HE junction 35.

A genome

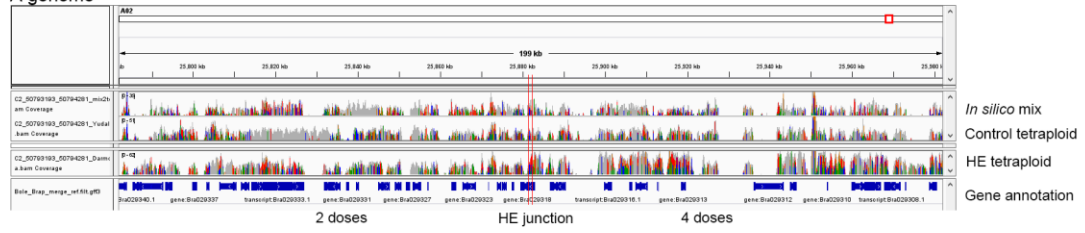

C genome

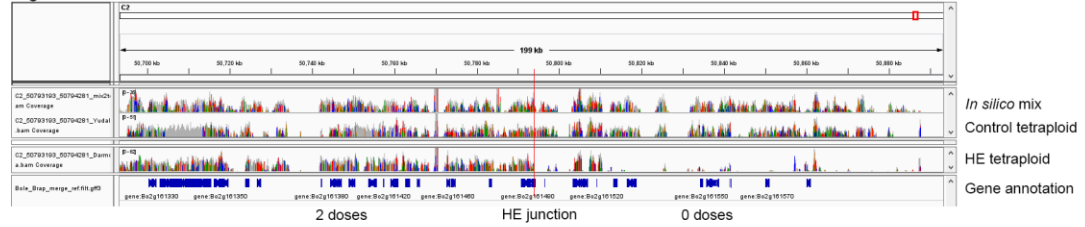

C genome

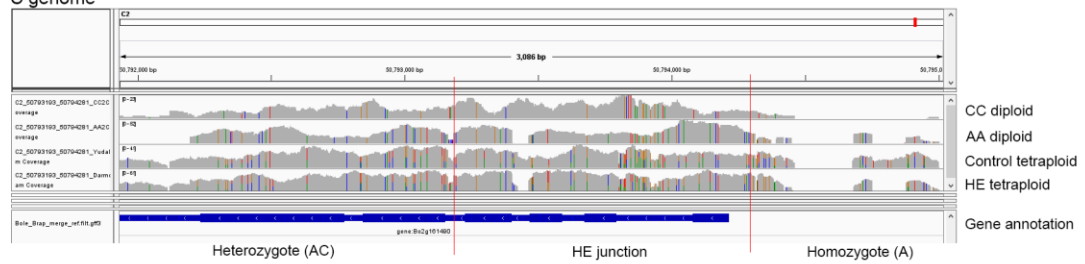

HE junction 36.

A genome

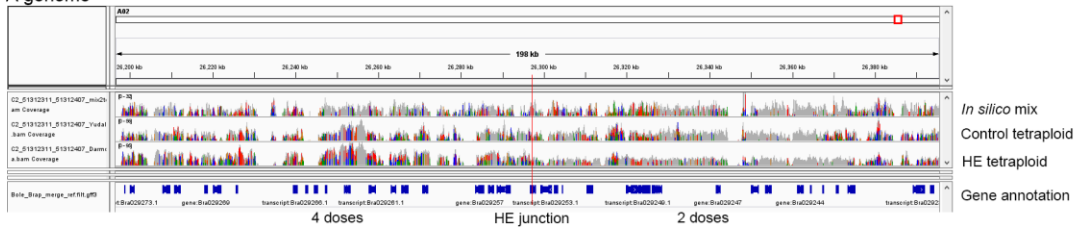

C genome

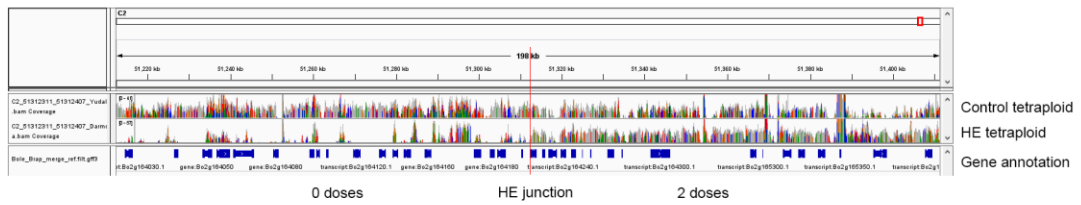

C genome

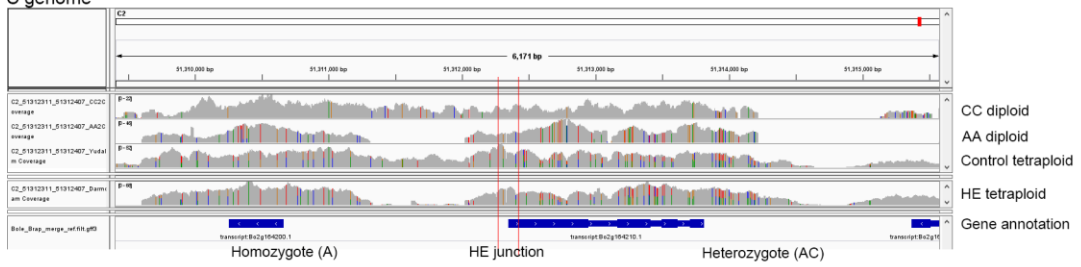

HE junction 37.

C genome

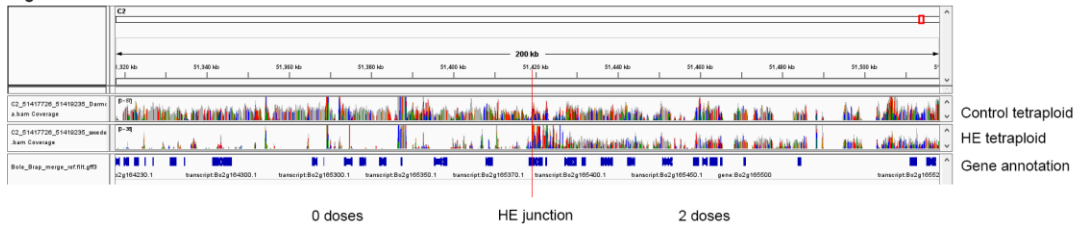

C genome

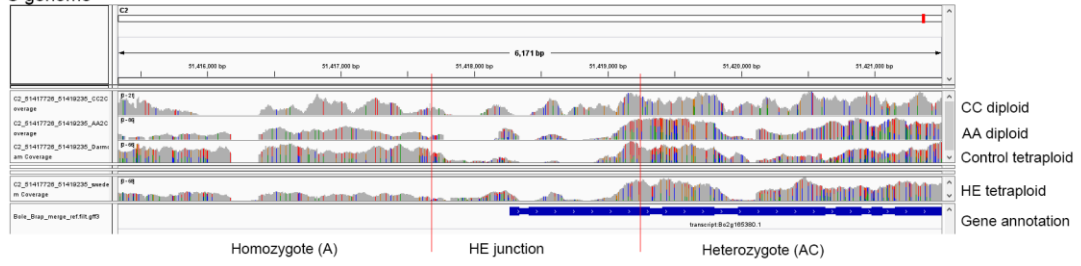

HE junction 38.

A genome

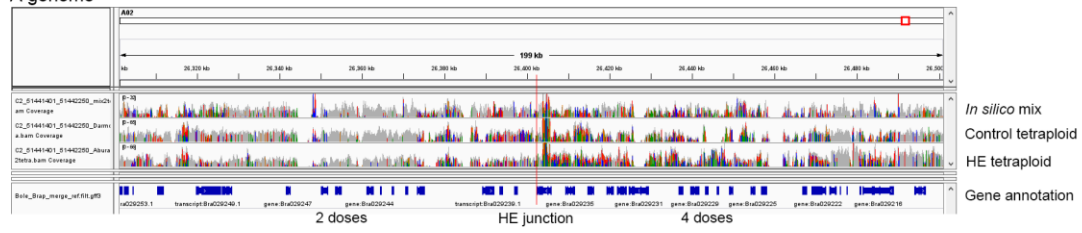

C genome

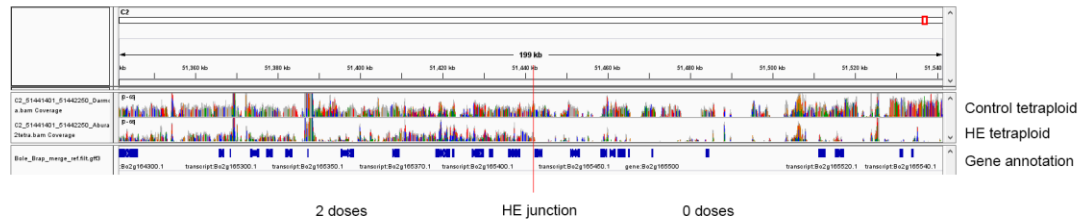

C genome

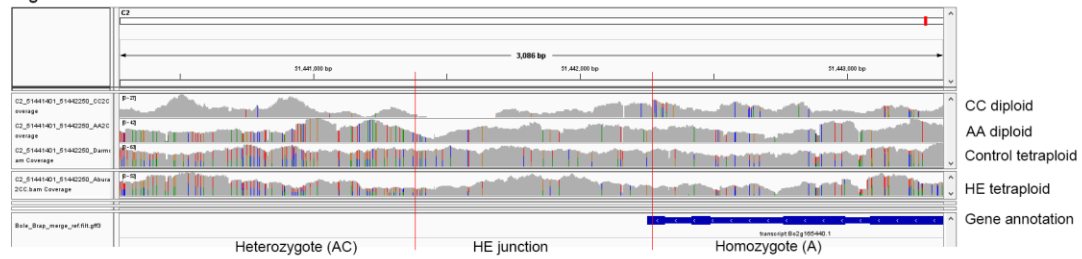

HE junction 39.

A genome

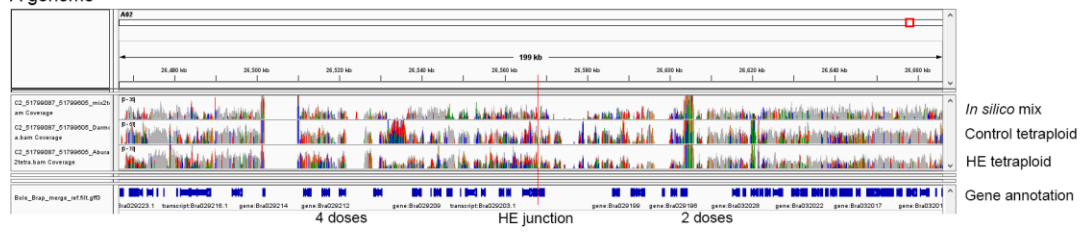

C genome

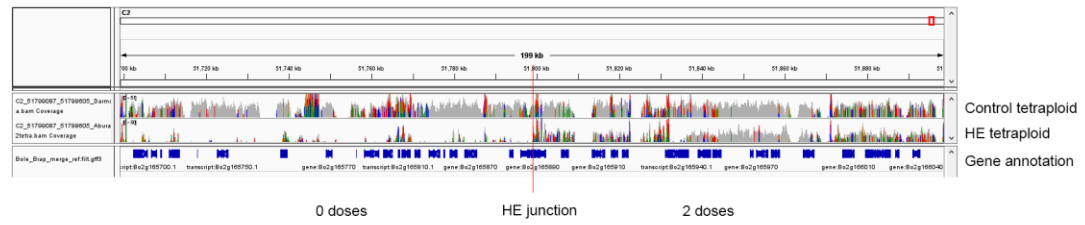

C genome

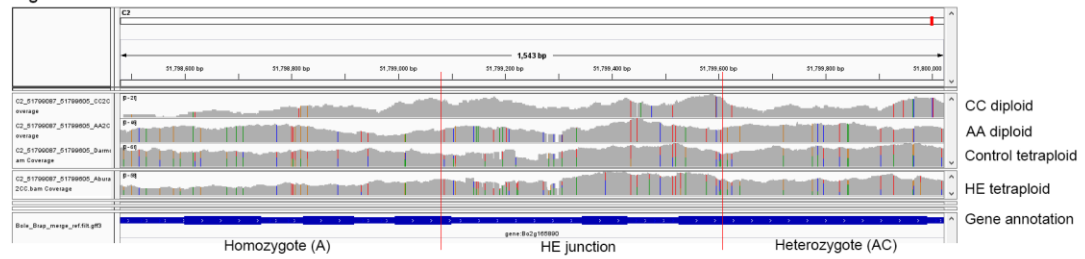

HE junction 40.

A genome

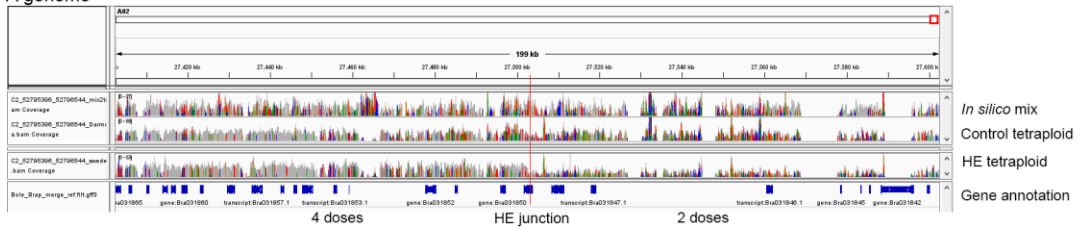

C genome

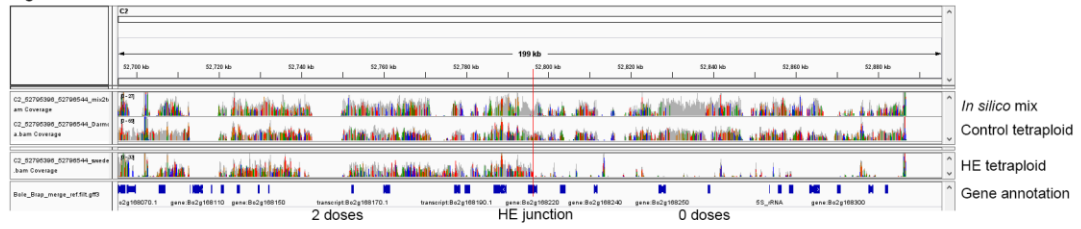

C genome

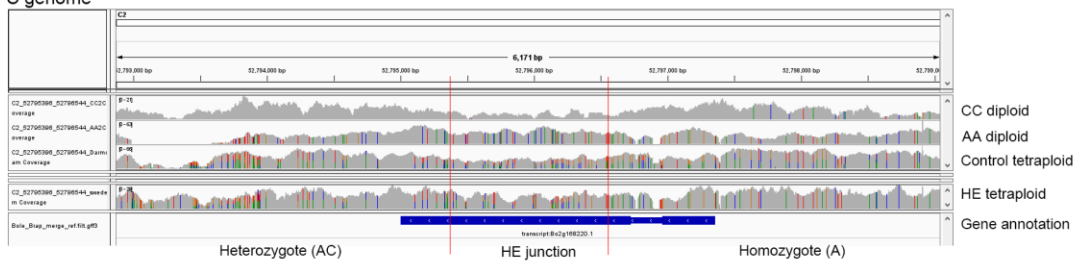

HE junction 41.

A genome

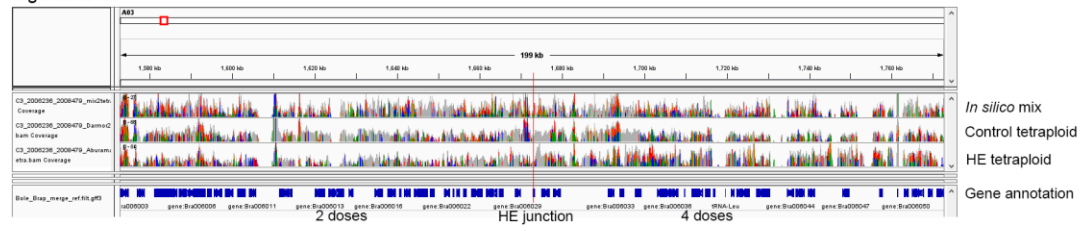

C genome

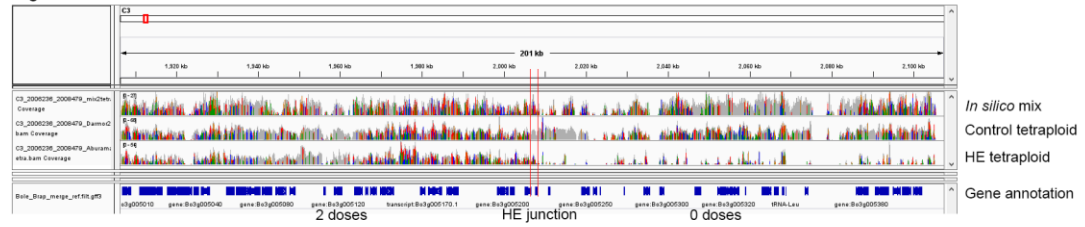

C genome

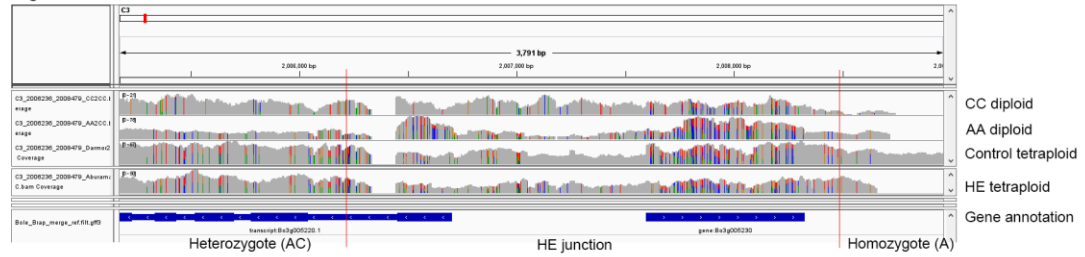

HE junction 42.



A genome

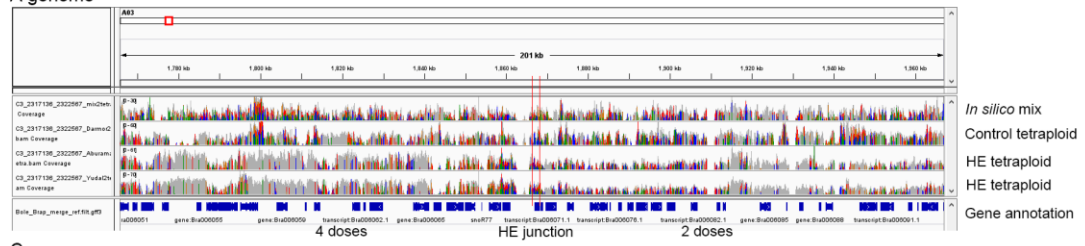

C genome

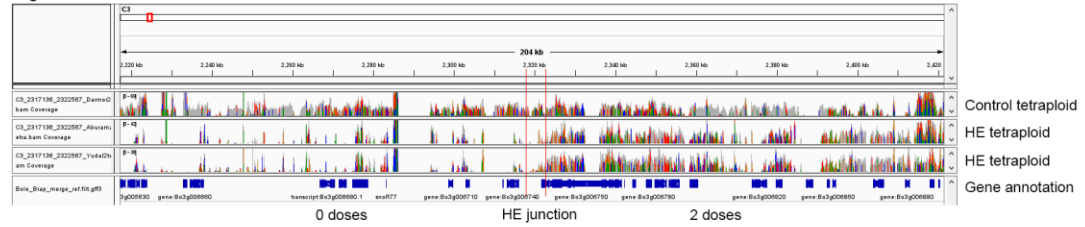

C genome

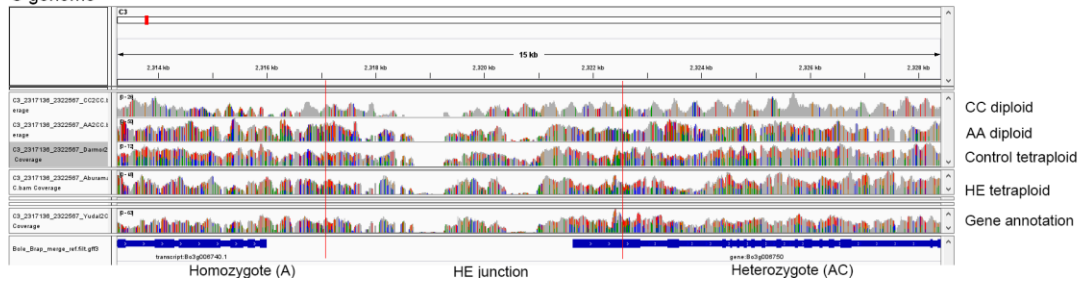

HE junction 43.

A genome

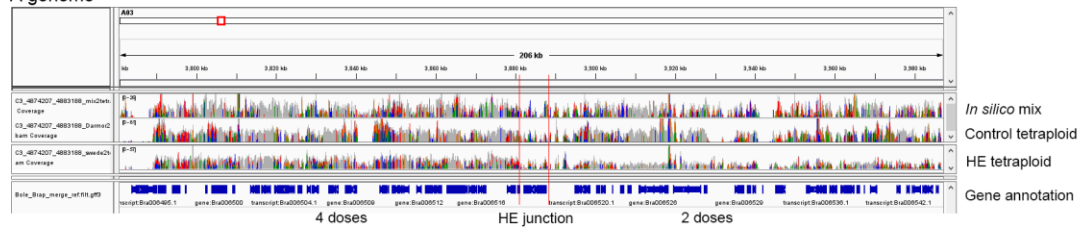

C genome

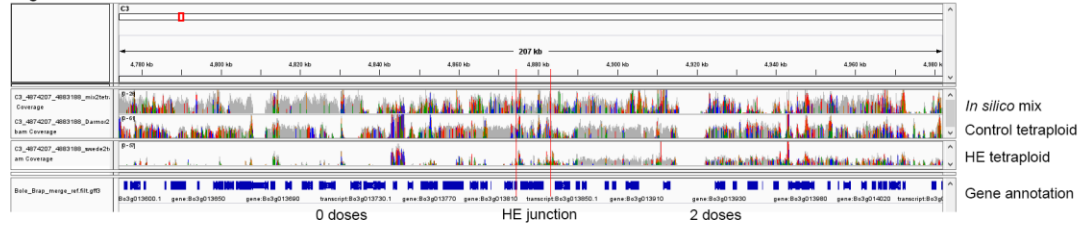

C genome

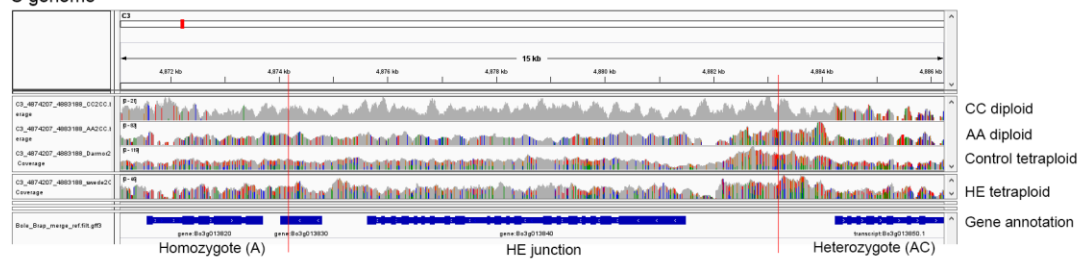

HE junction 44.

A genome

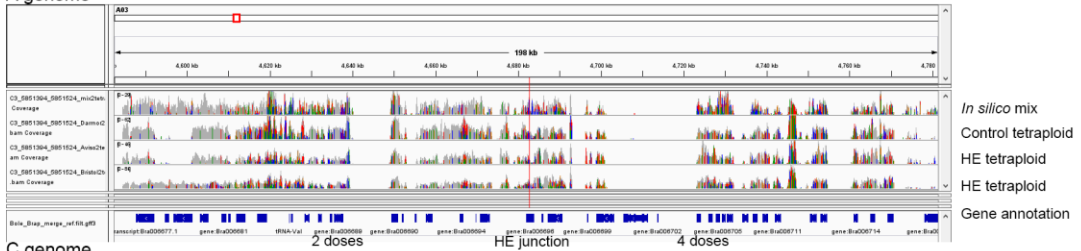

C genome

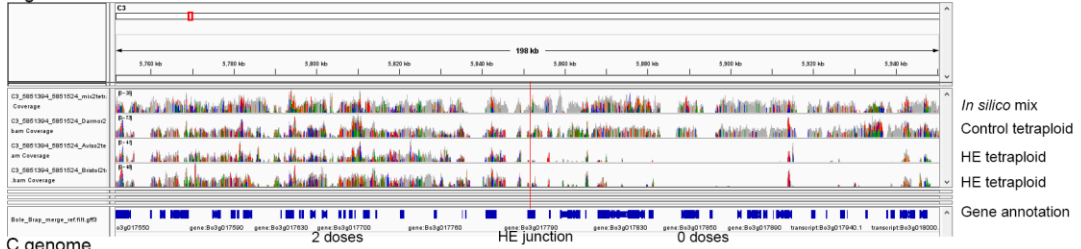

C genome

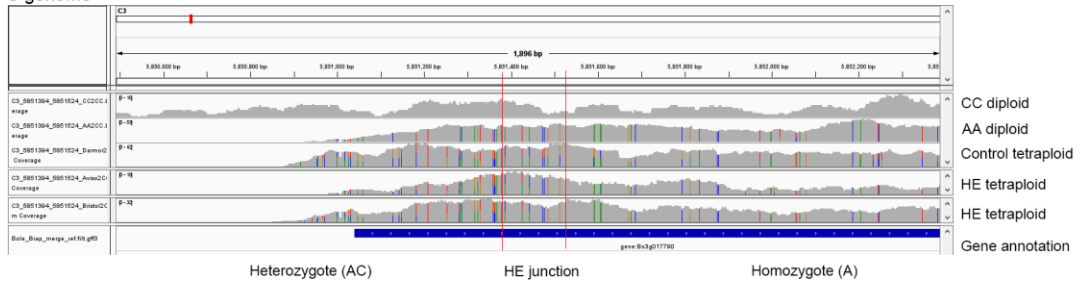

HE junction 45.

A genome

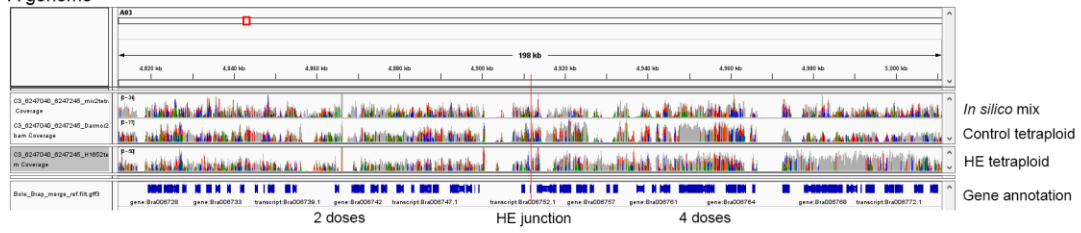

C genome

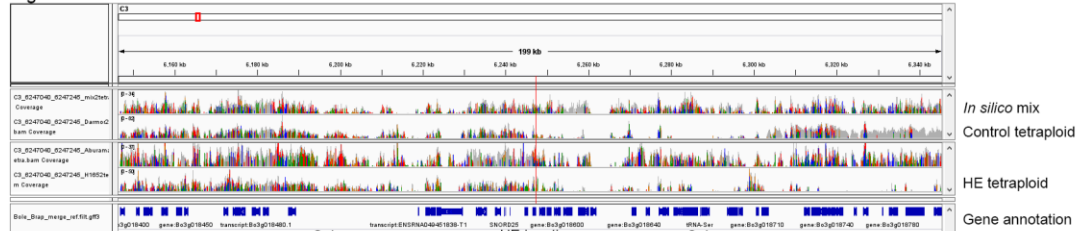

C genome

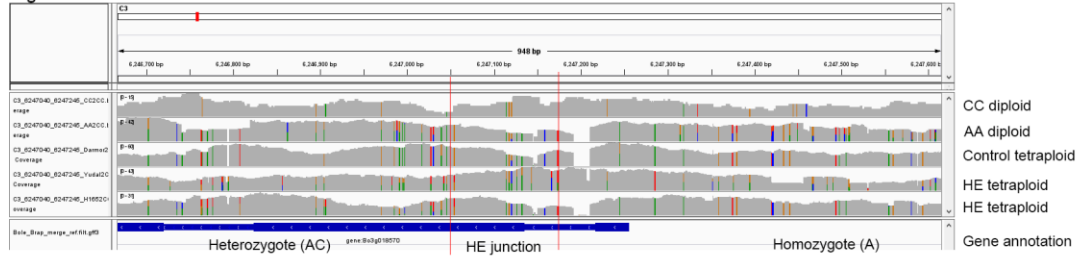

HE junction 46.

A genome

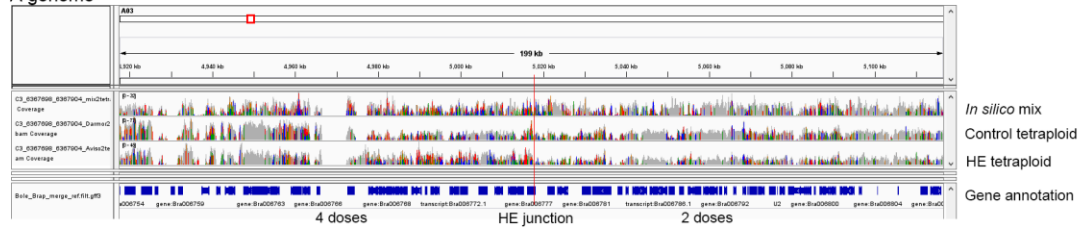

C genome

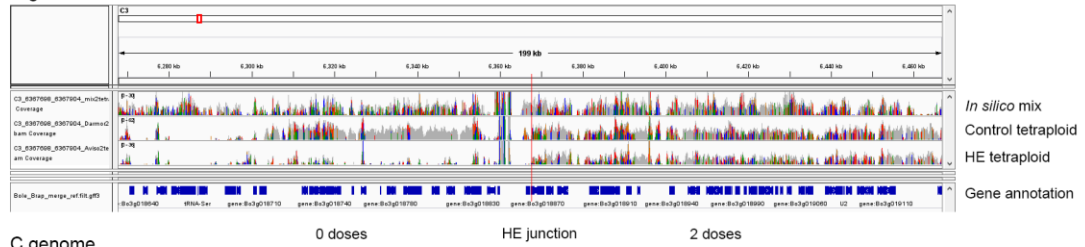

C genome

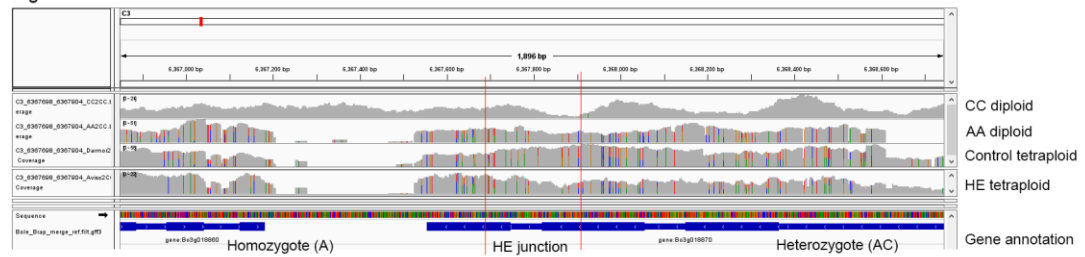

HE junction 47.

A genome

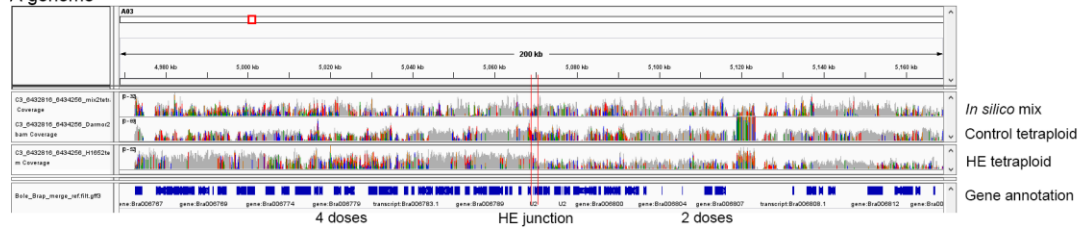

C genome

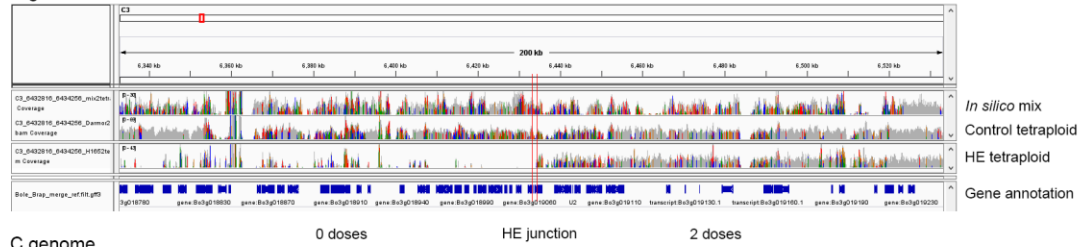

C genome

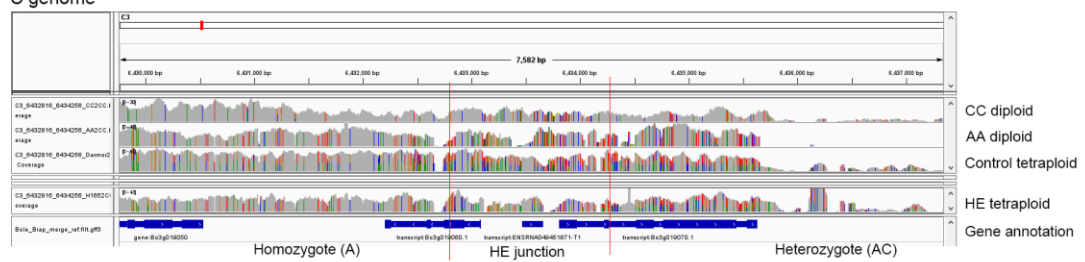

HE junction 48.

A genome

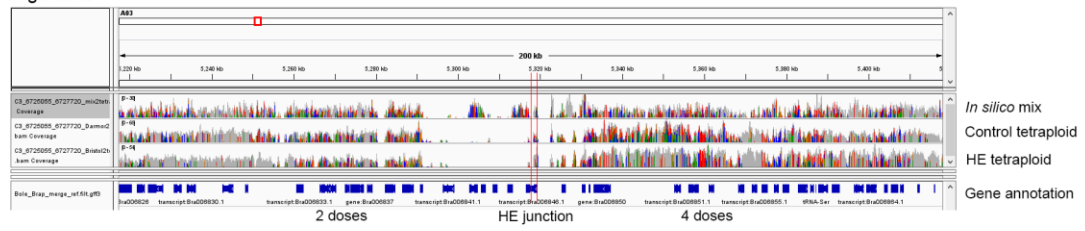

C genome

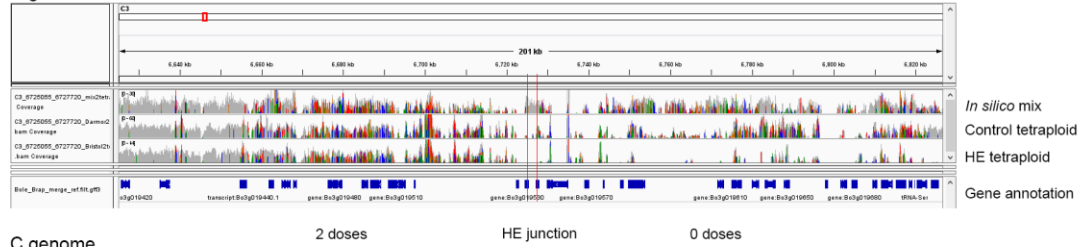

C genome

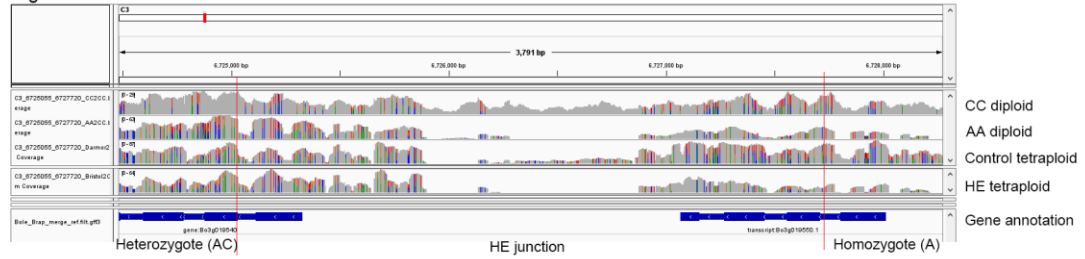

HE junction 49.

A genome

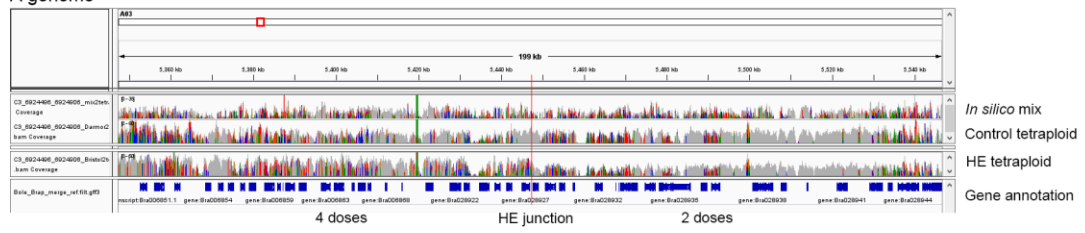

C genome

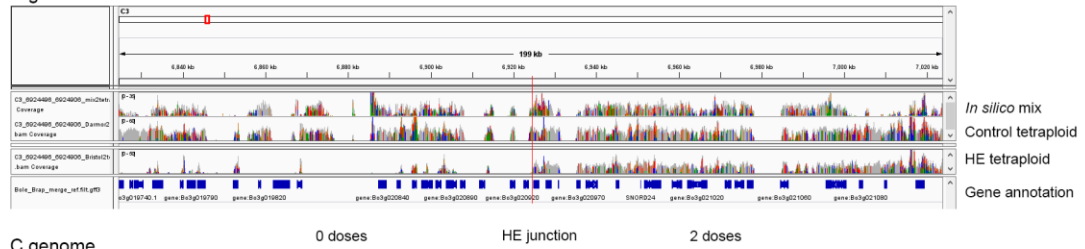

C genome

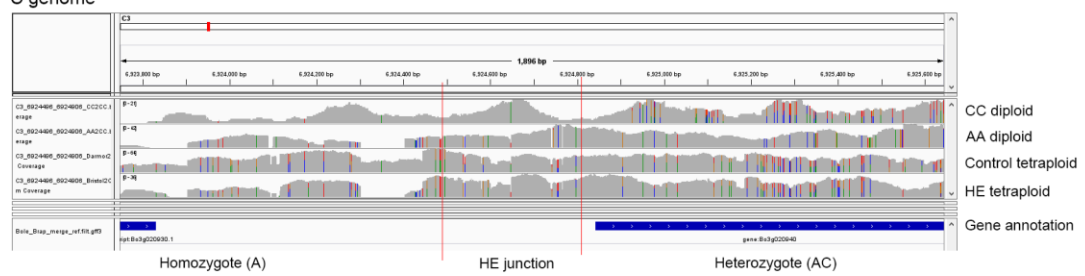

HE junction 50.



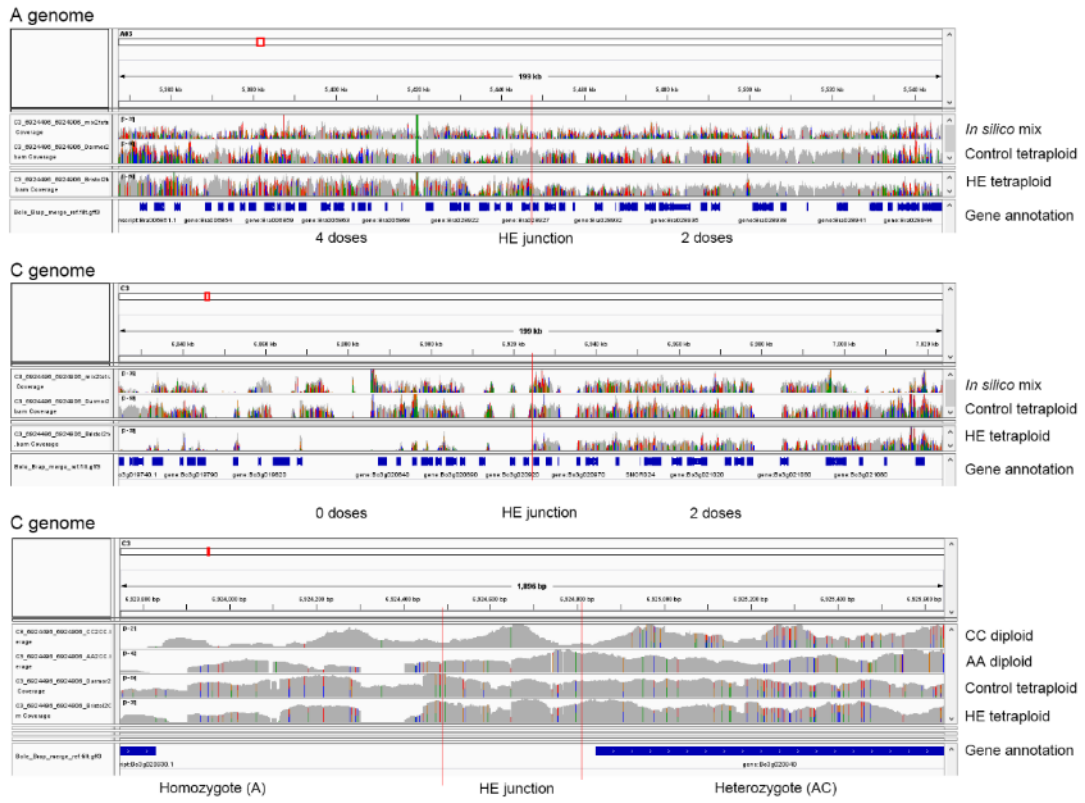

HE junction 51.

A genome

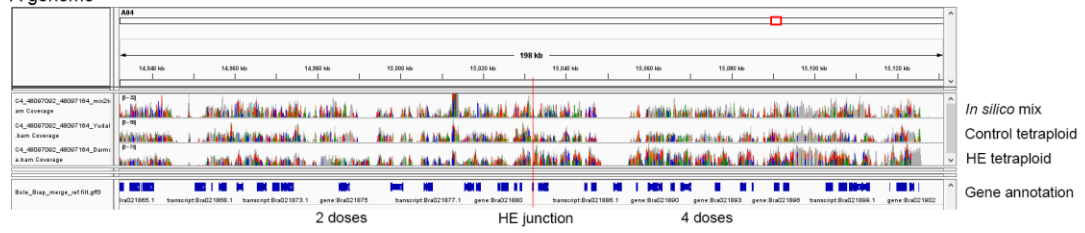

C genome

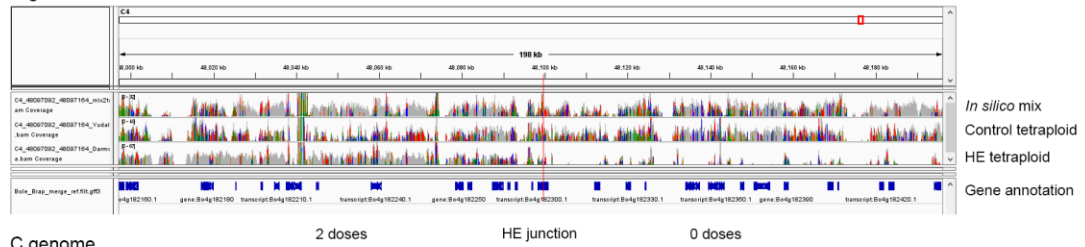

C genome

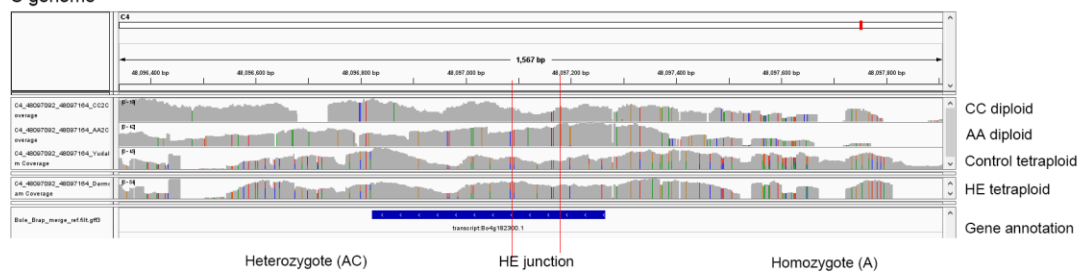

HE junction 52.

A genome

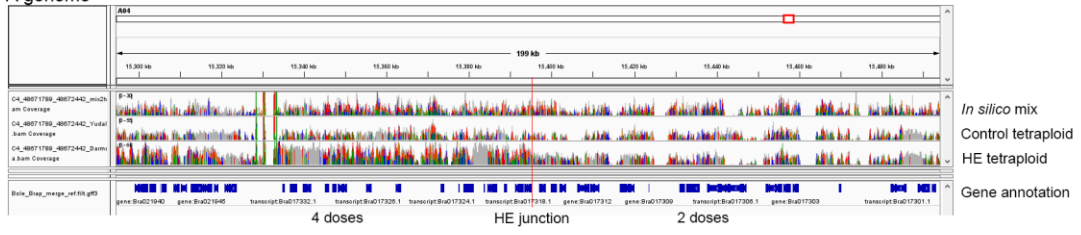

C genome

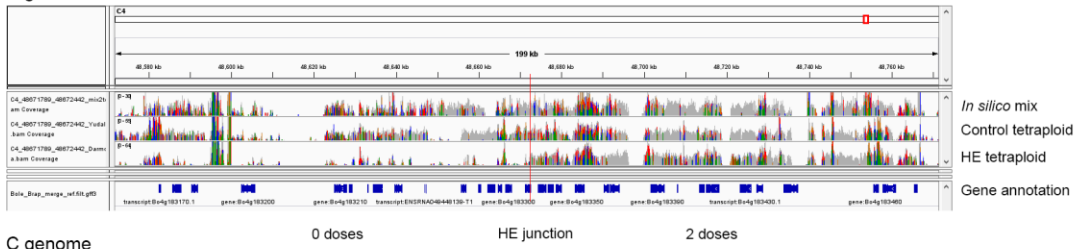

C genome

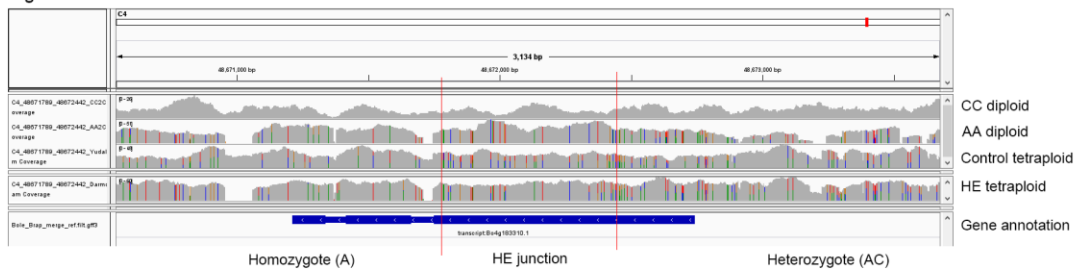

HE junction 53.

A genome

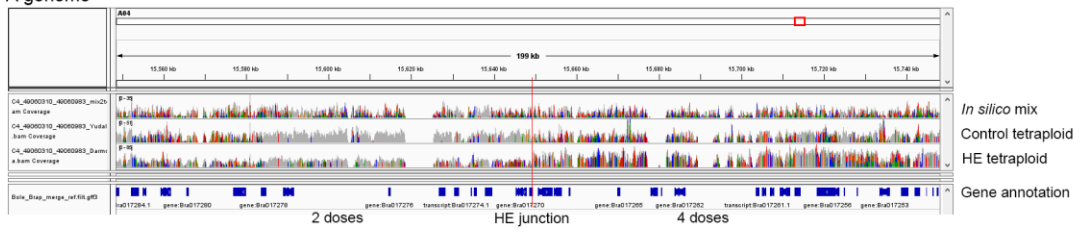

C genome

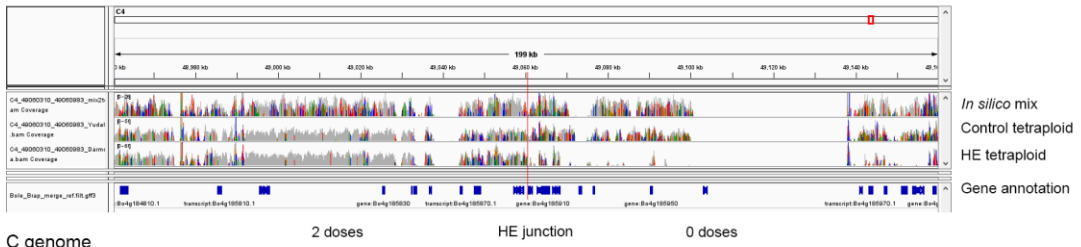

C genome

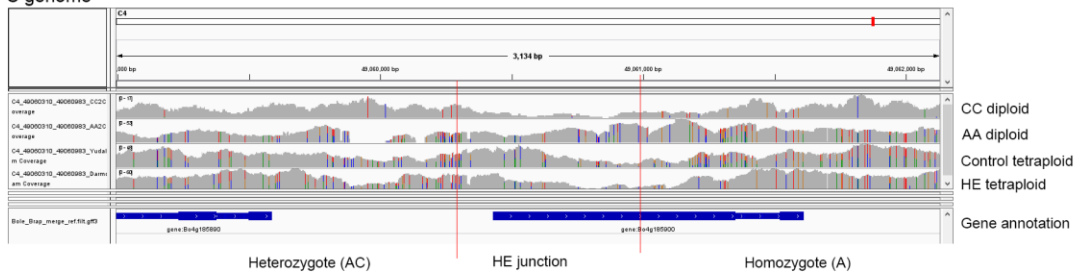

HE junction 54.

A genome

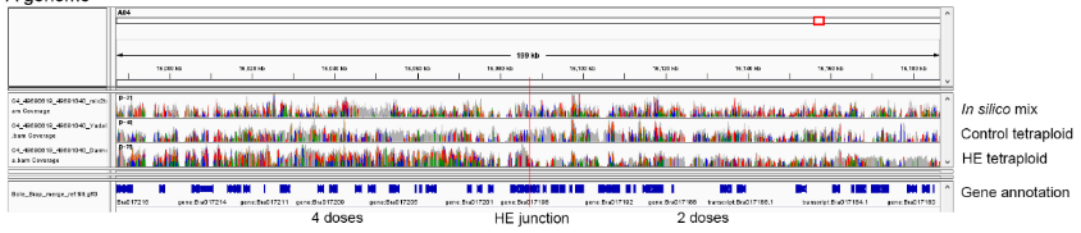

C genome

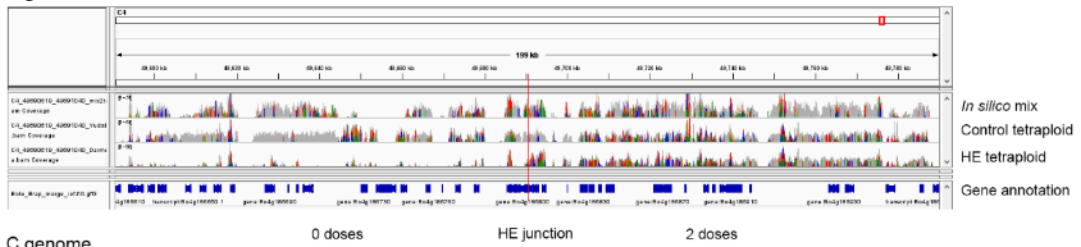

C genome

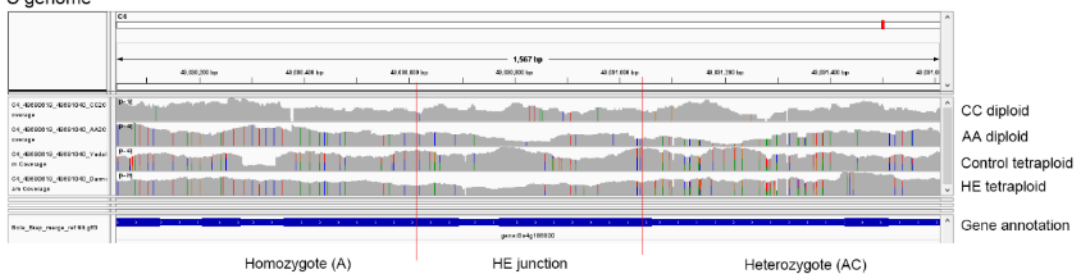

HE junction 55.

A genome

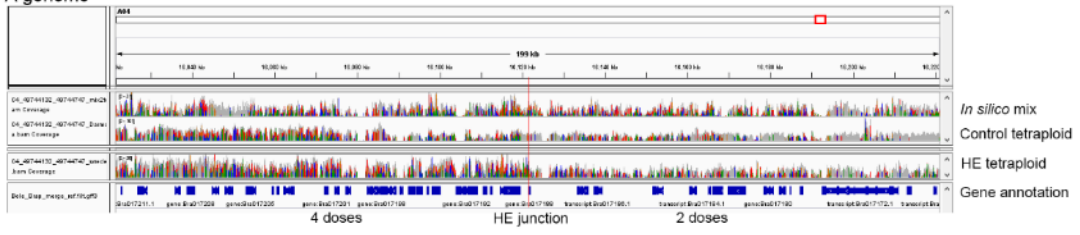

C genome

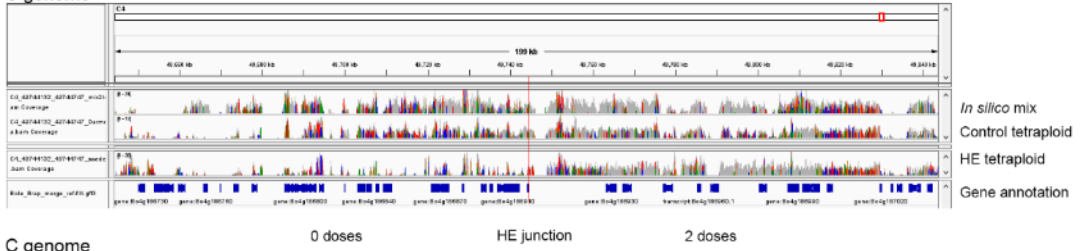

C genome

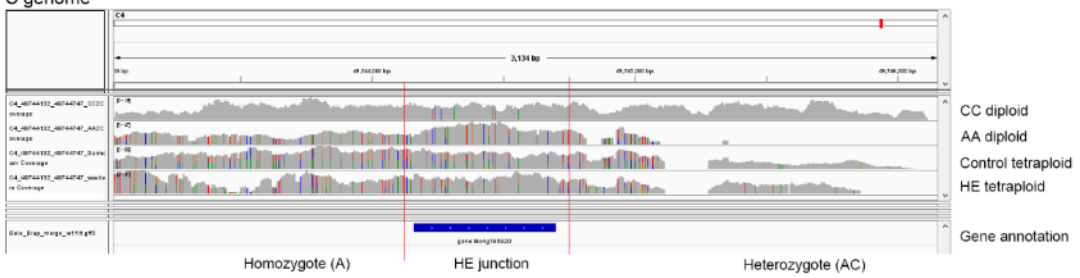

HE junction 56.

A genome

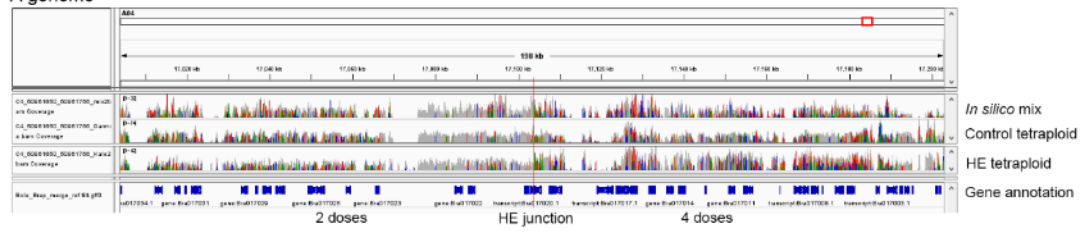

C genome

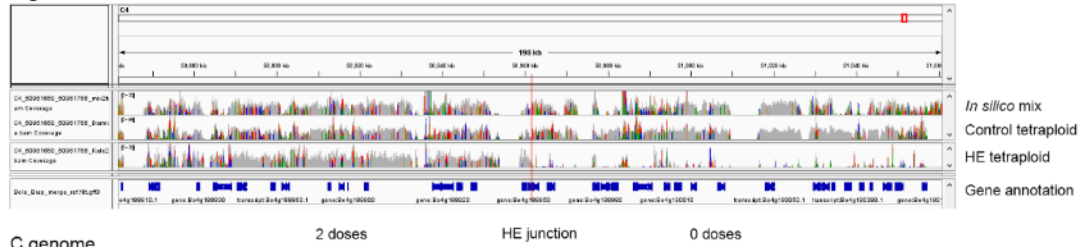

C genome

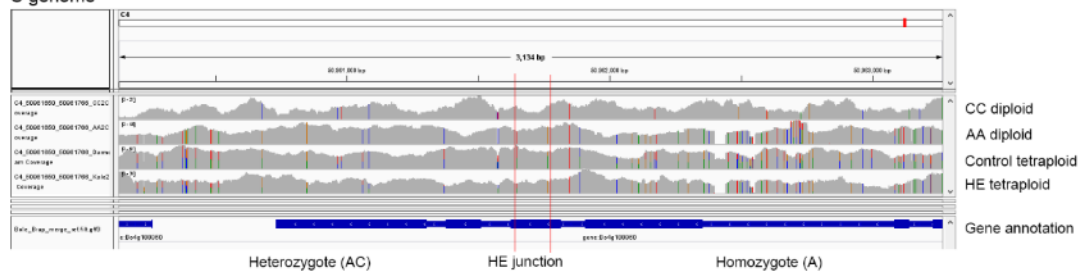

HE junction 57.

A genome

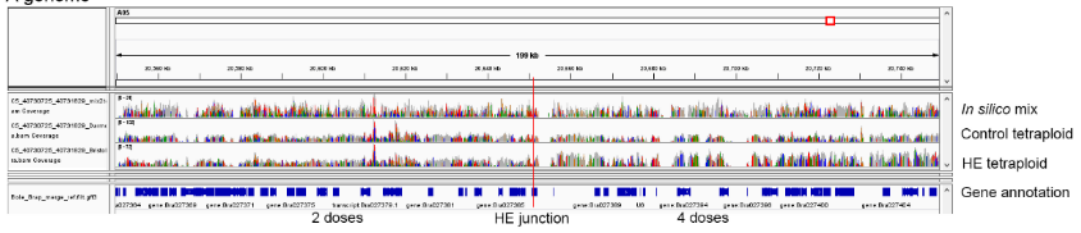

C genome

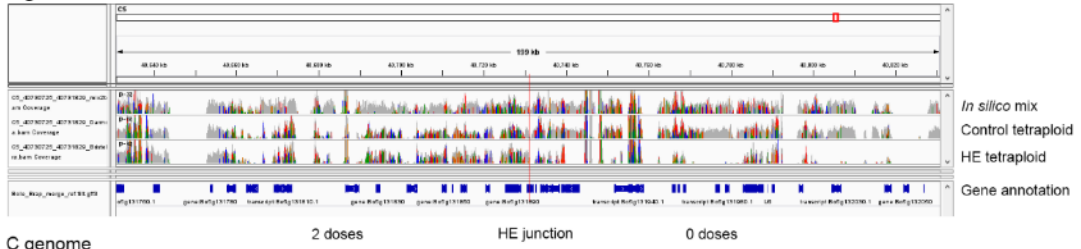

C genome

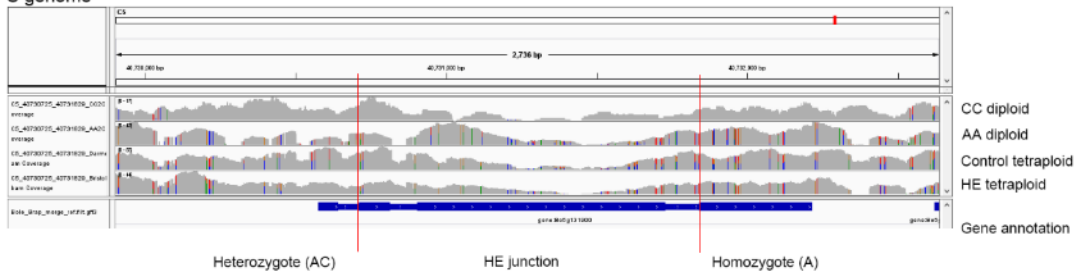

HE junction 58.



A genome

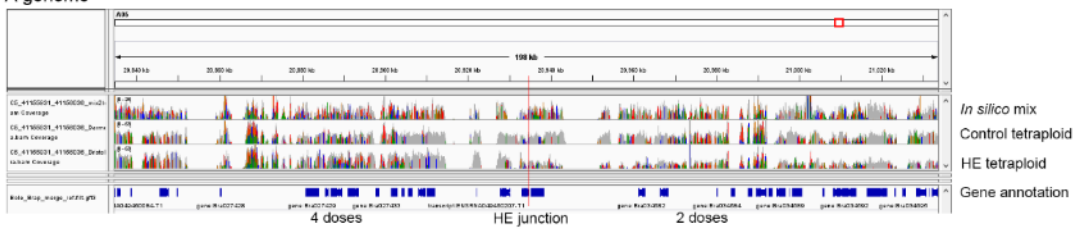

C genome

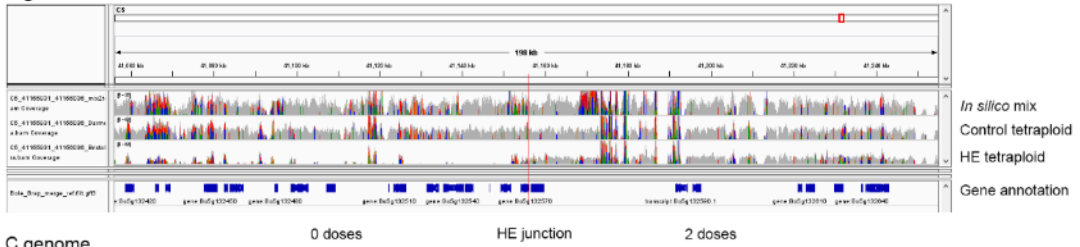

C genome

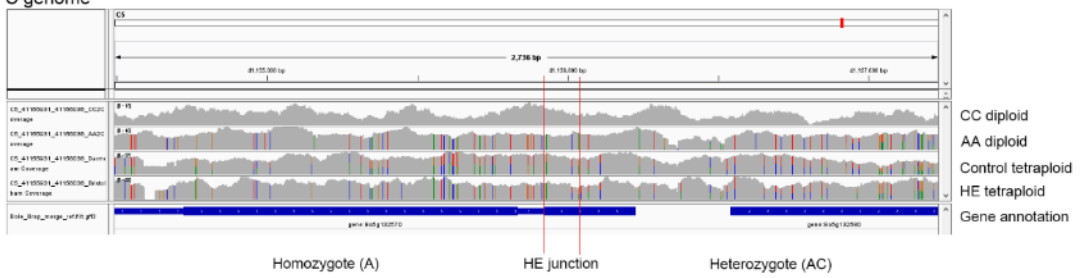

HE junction 59.

A genome

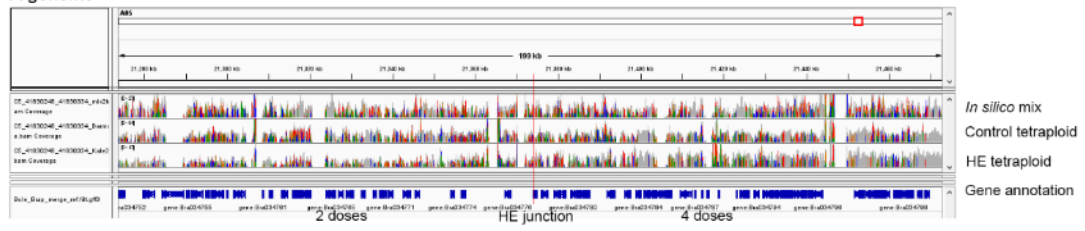

C genome

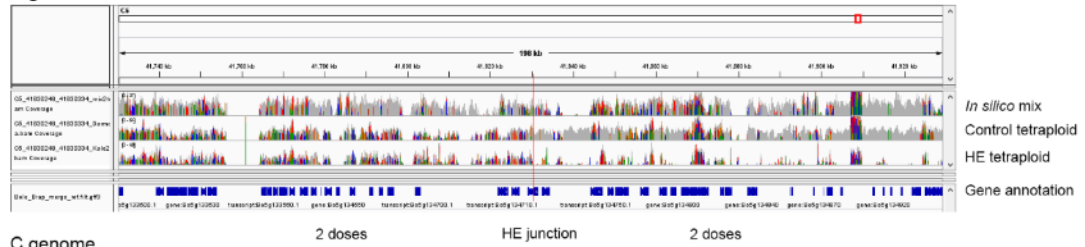

C genome

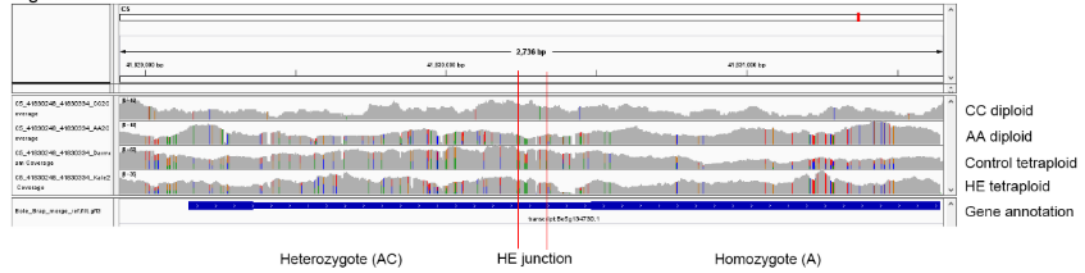

HE junction 60.

A genome

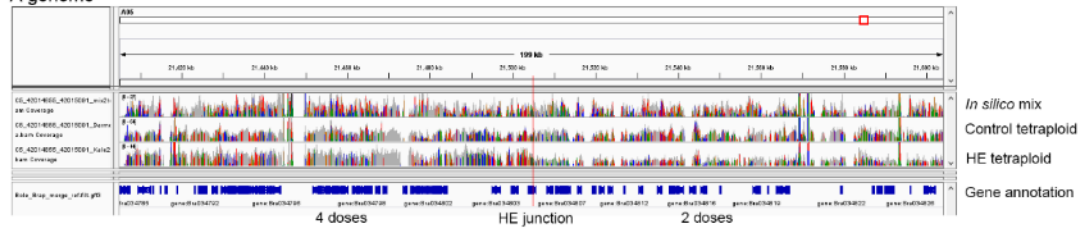

C genome

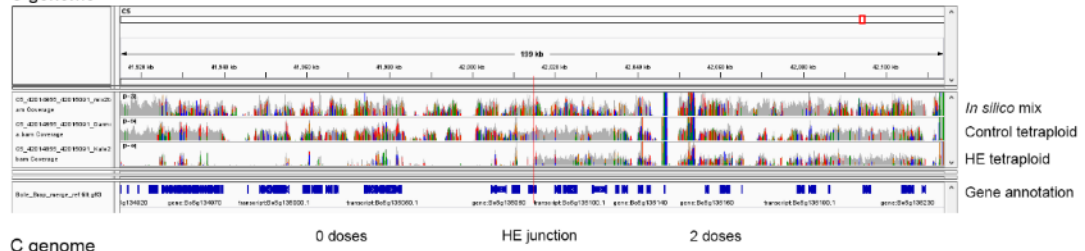

C genome

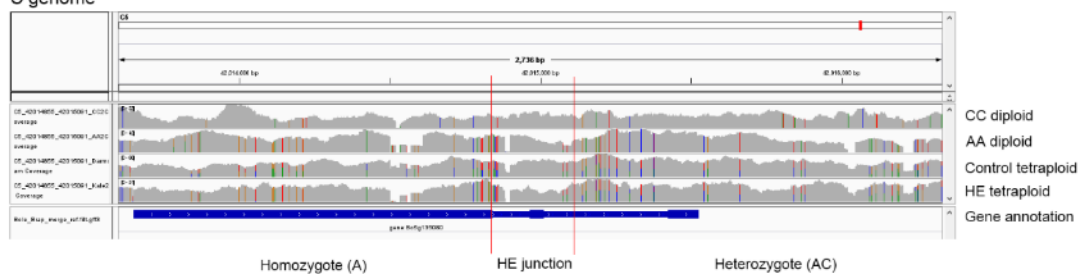

HE junction 61.

A genome

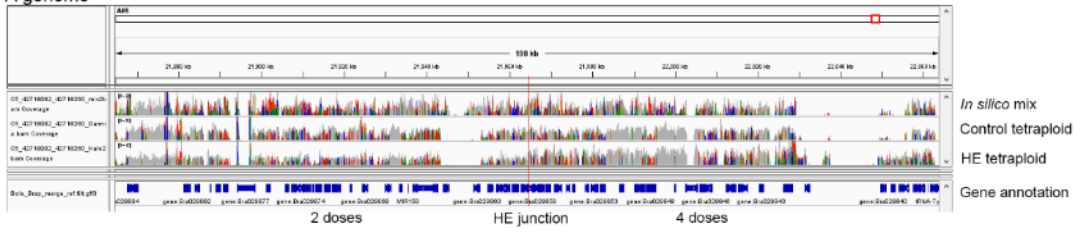

C genome

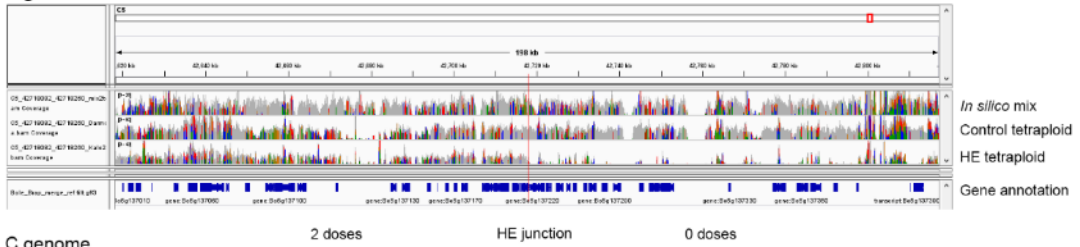

C genome

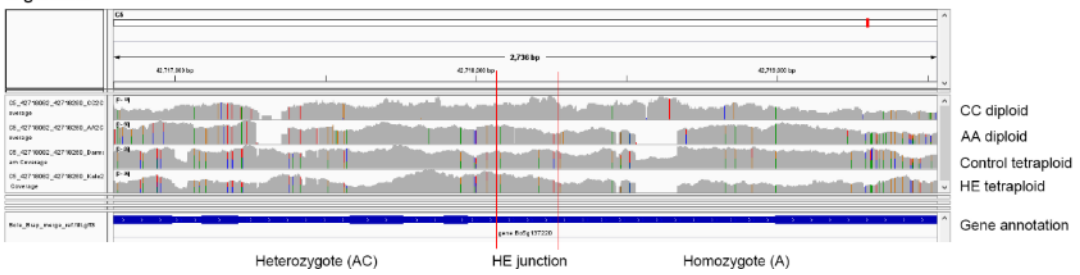

HE junction 62.

### A genome

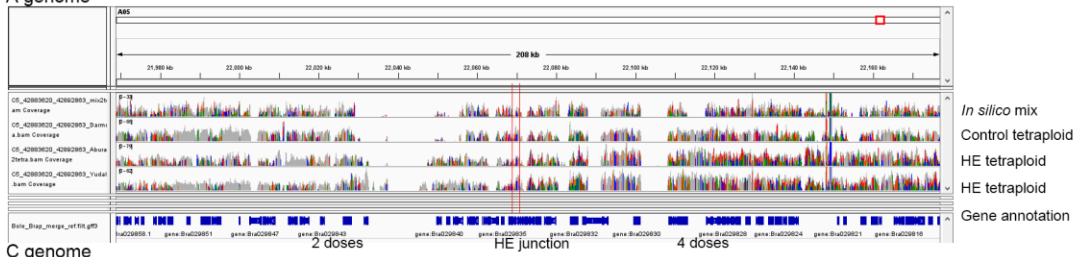

### C genome

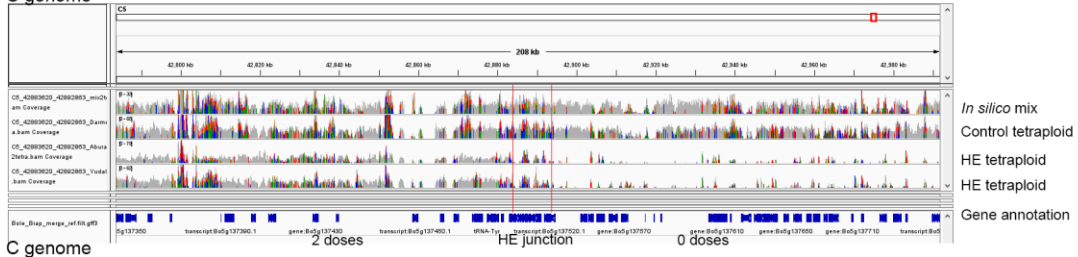

### C genome

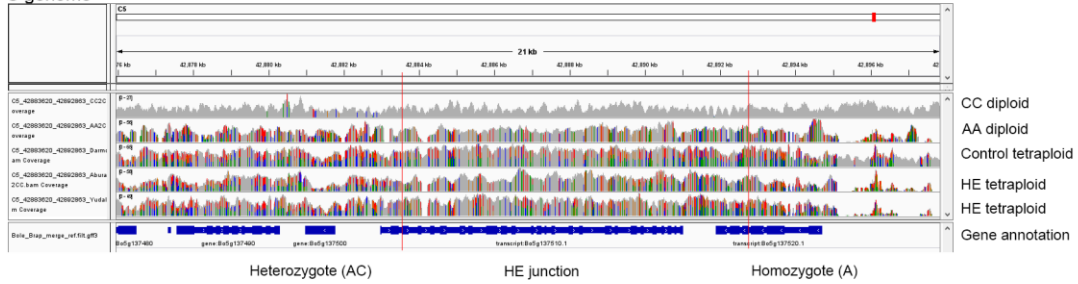

HE junction 63.

A genome

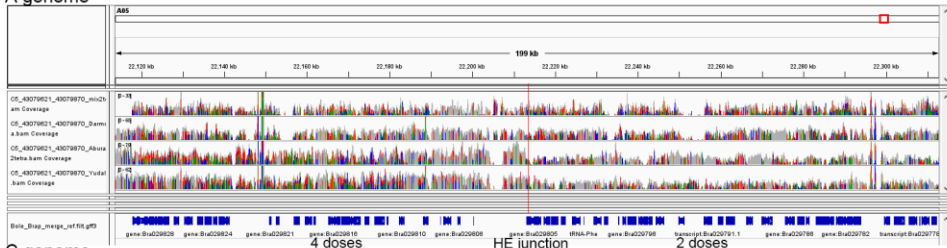

*In silico* mix  
Control tetraploid  
HE tetraploid  
HE tetraploid  
Gene annotation

C genome

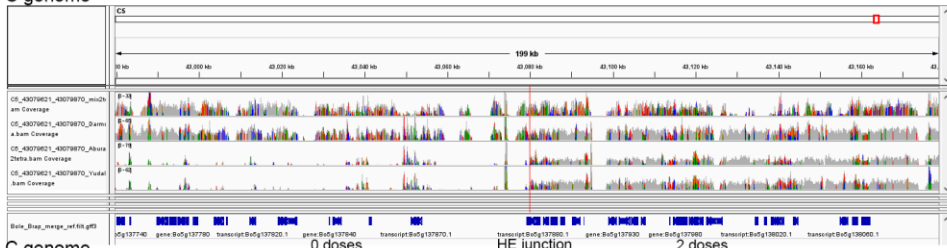

*In silico* mix  
Control tetraploid  
HE tetraploid  
HE tetraploid  
Gene annotation

C genome

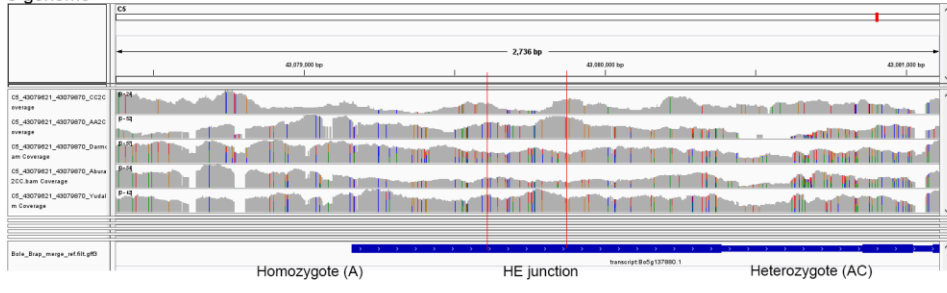

CC diploid  
AA diploid  
Control tetraploid  
HE tetraploid  
HE tetraploid  
Gene annotation

Homozygote (A) HE junction Heterozygote (AC)

HE junction 64.

A genome

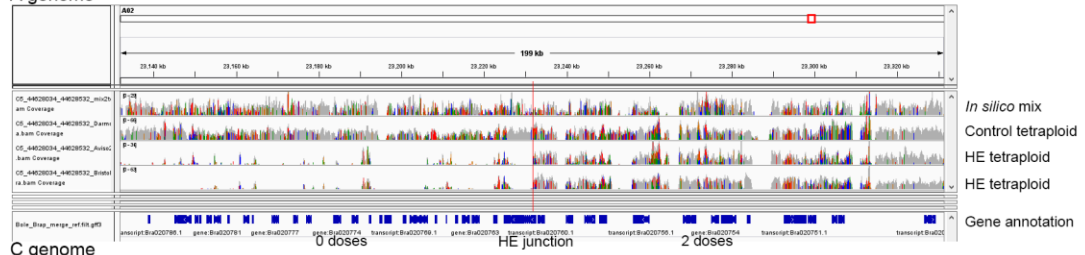

C genome

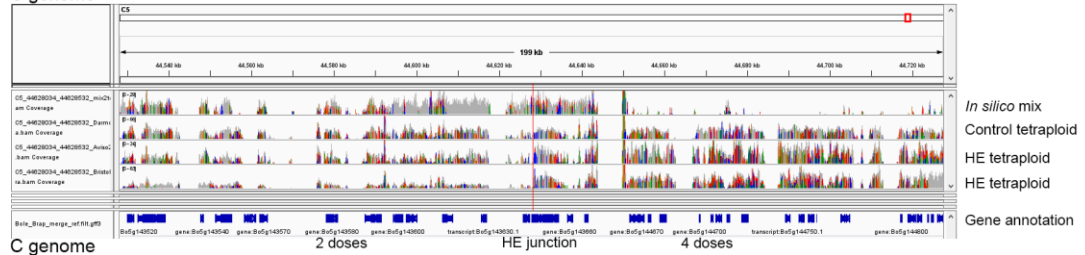

C genome

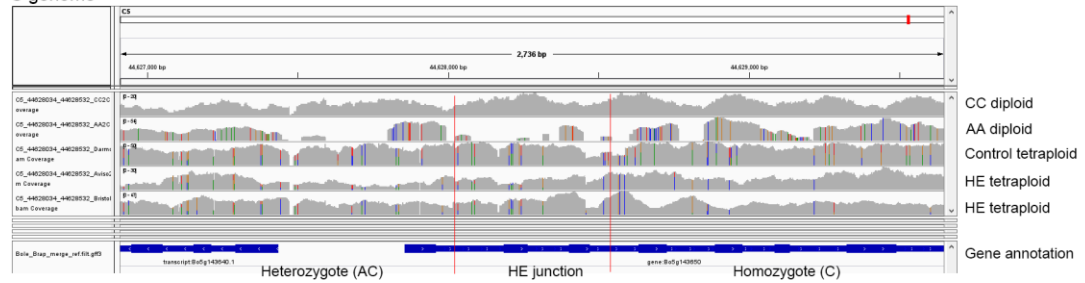

HE junction 65.

A genome

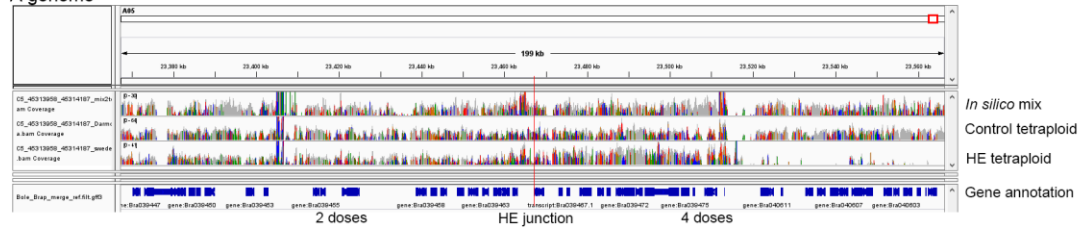

C genome

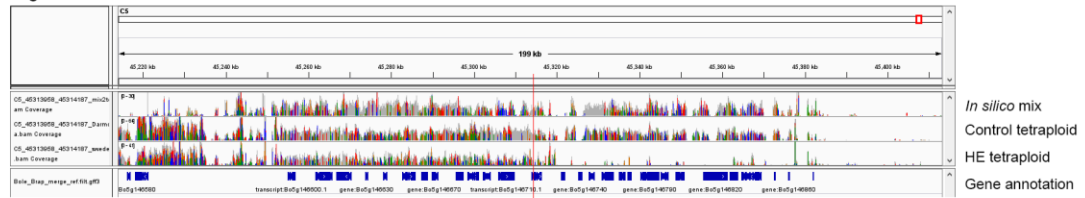

C genome

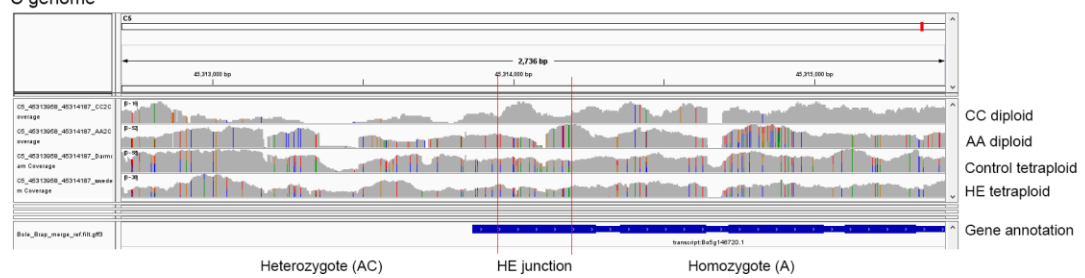

HE junction 66.



A genome

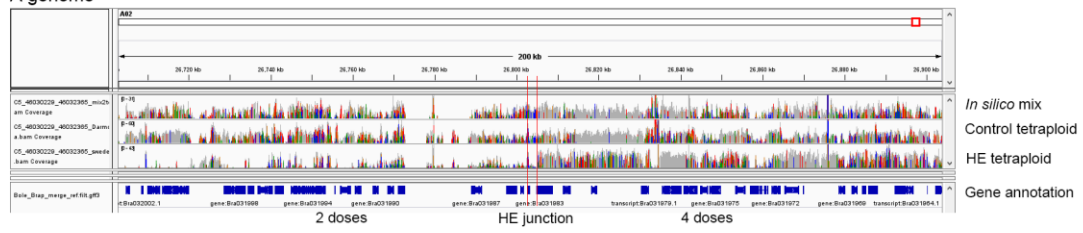

C genome

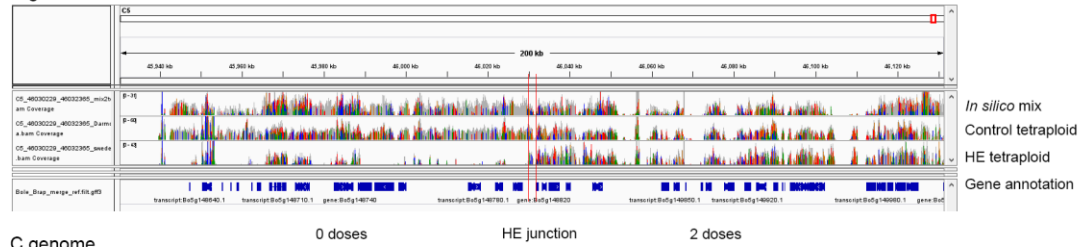

C genome

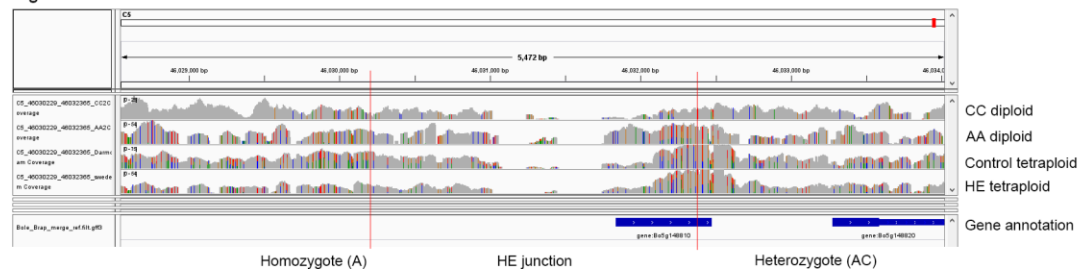

HE junction 67.

A genome

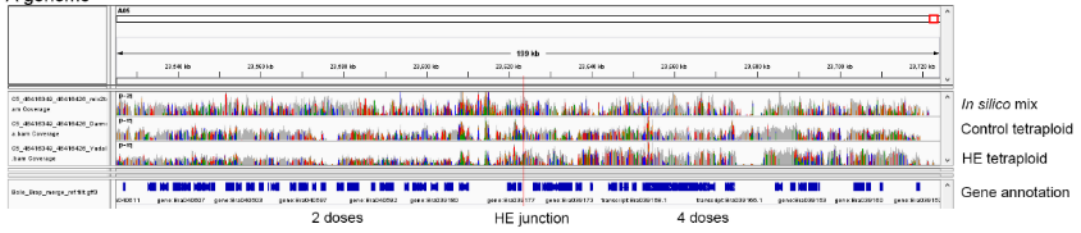

C genome

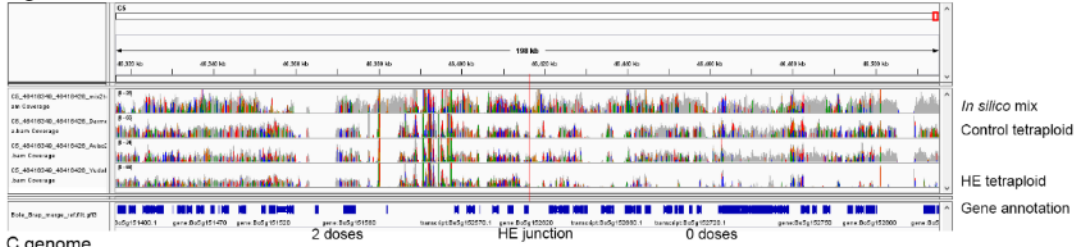

C genome

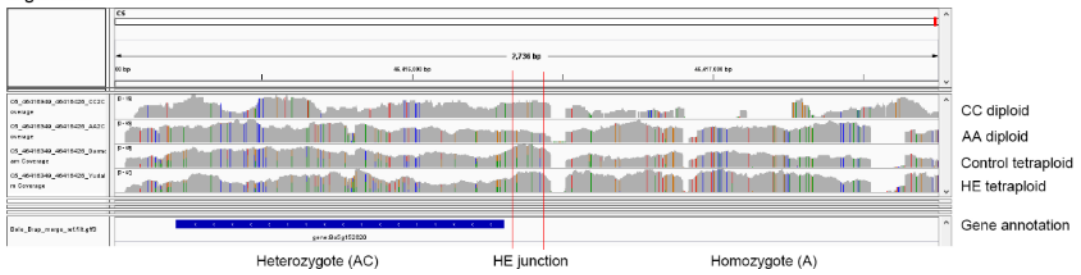

HE junction 68.

A genome

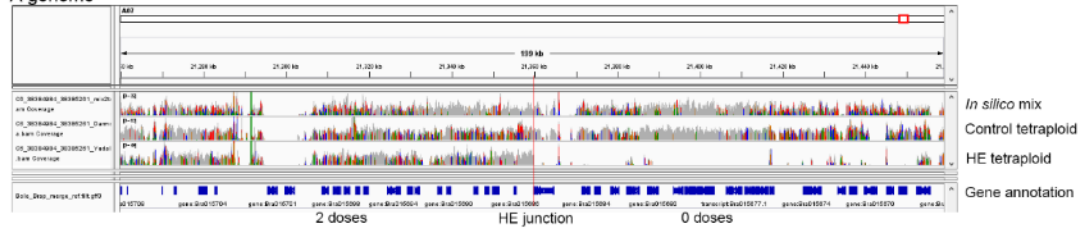

C genome

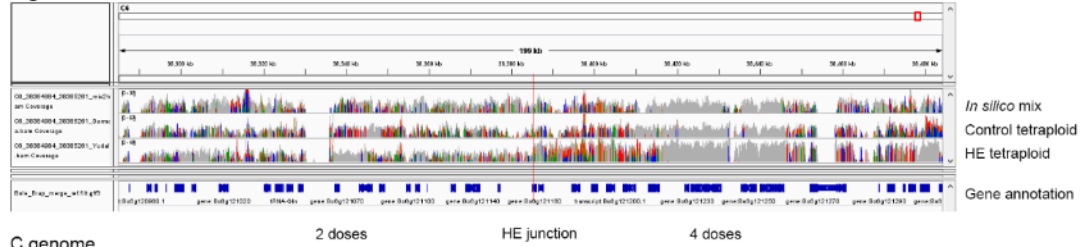

C genome

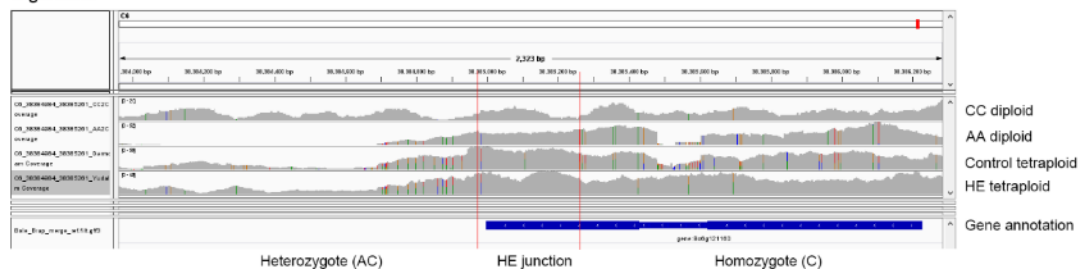

HE junction 69.

A genome

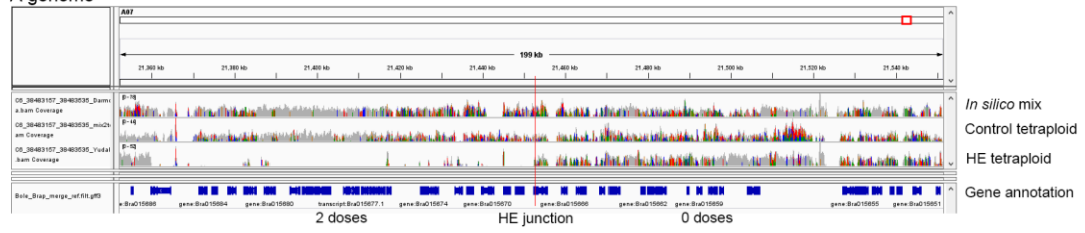

C genome

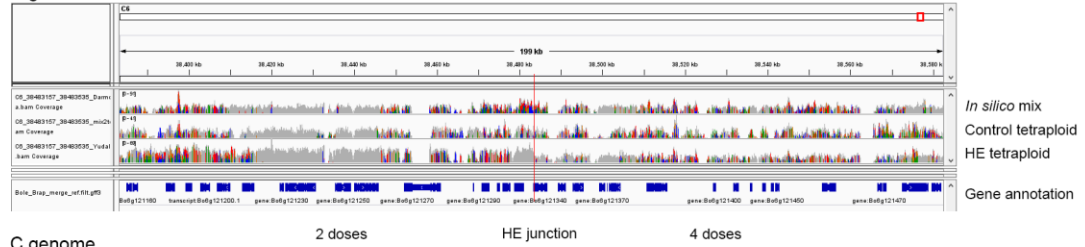

C genome

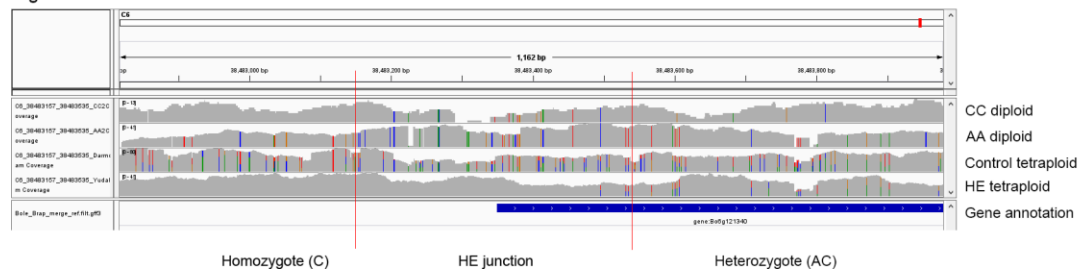

HE junction 70.

A genome

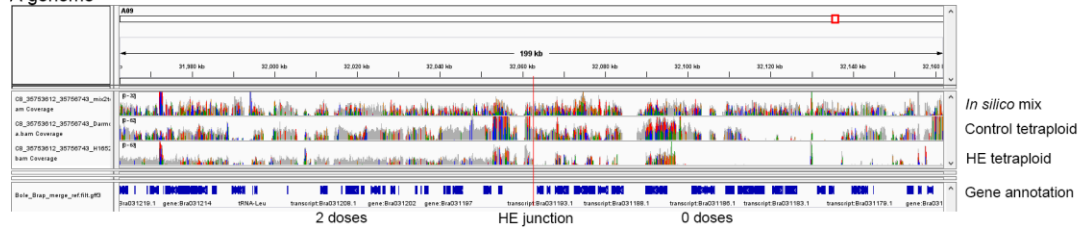

C genome

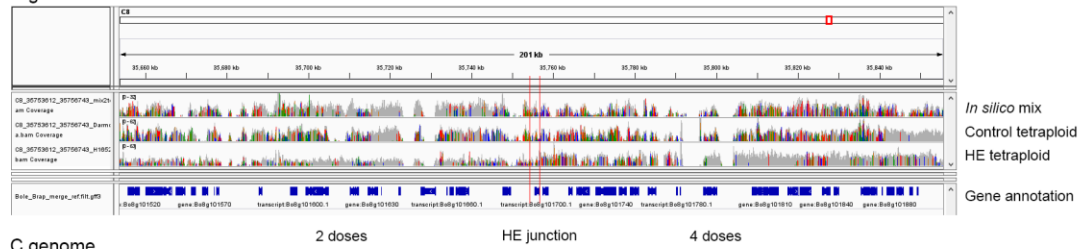

C genome

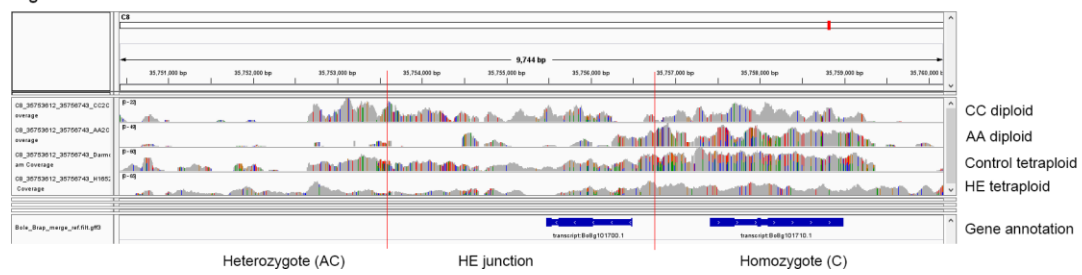

HE junction 71.

A genome

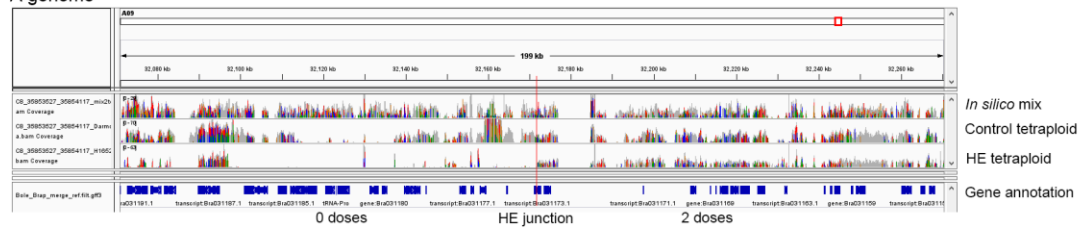

C genome

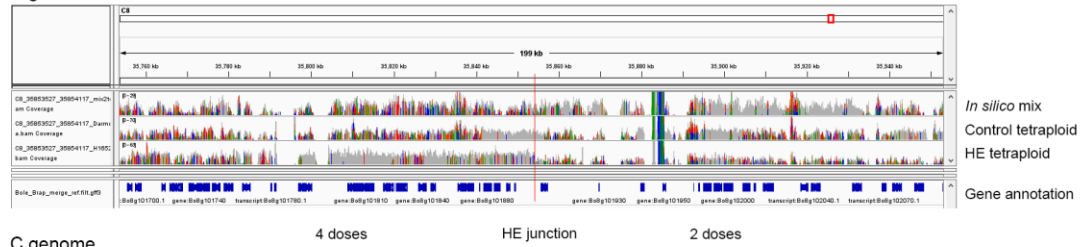

C genome

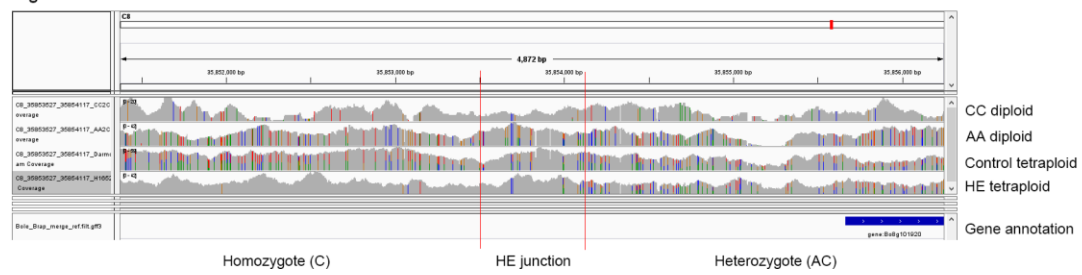

HE junction 72.

A genome

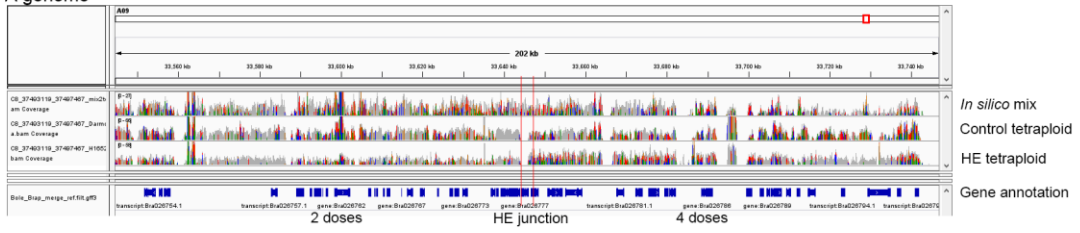

C genome

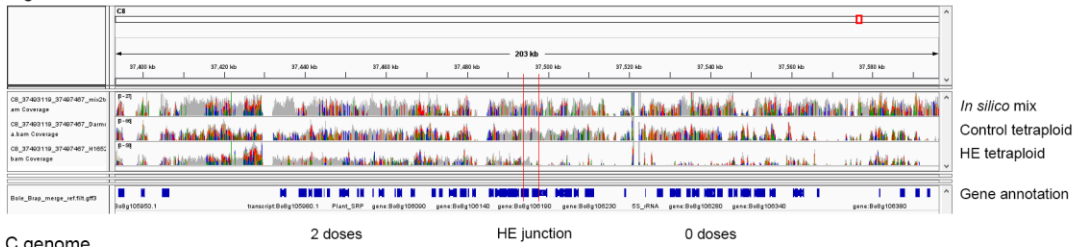

C genome

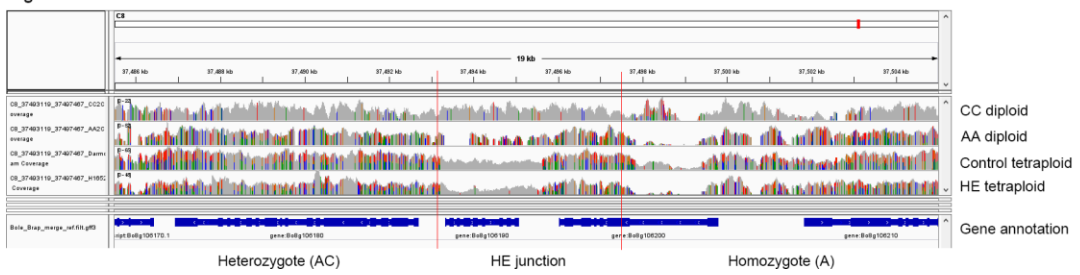

HE junction 73.

A genome

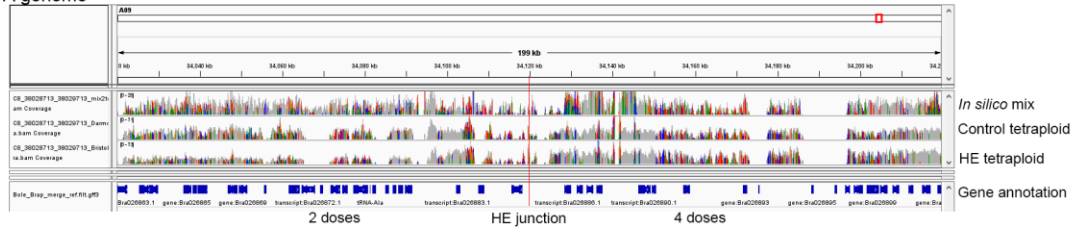

C genome

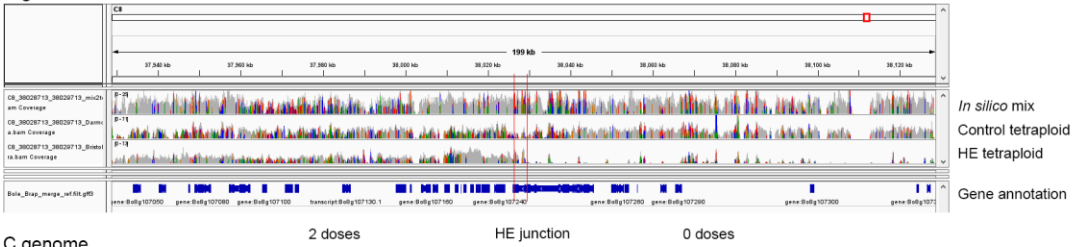

C genome

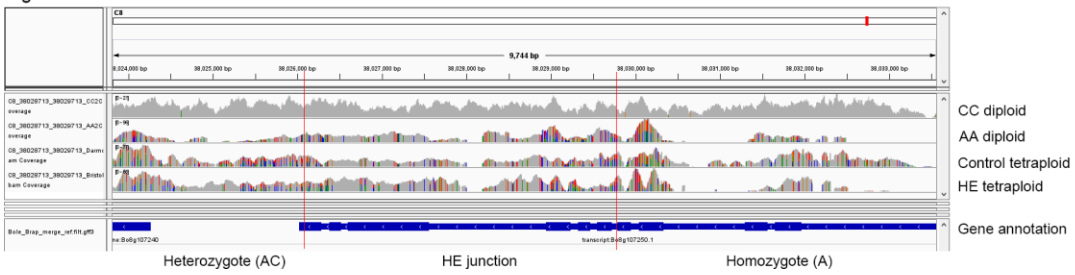

HE junction 74.



A genome

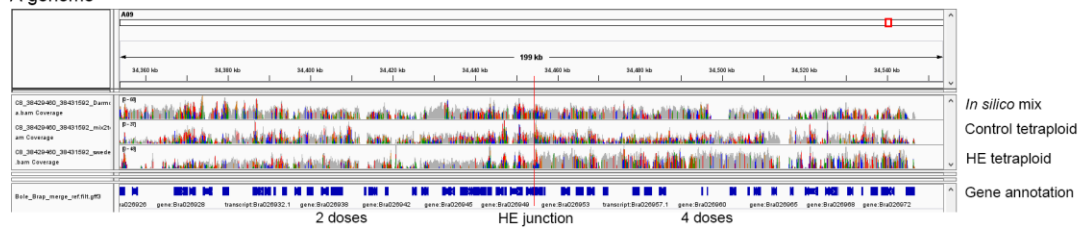

C genome

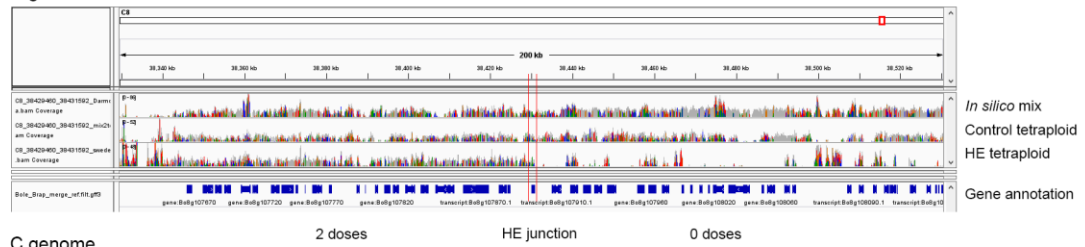

C genome

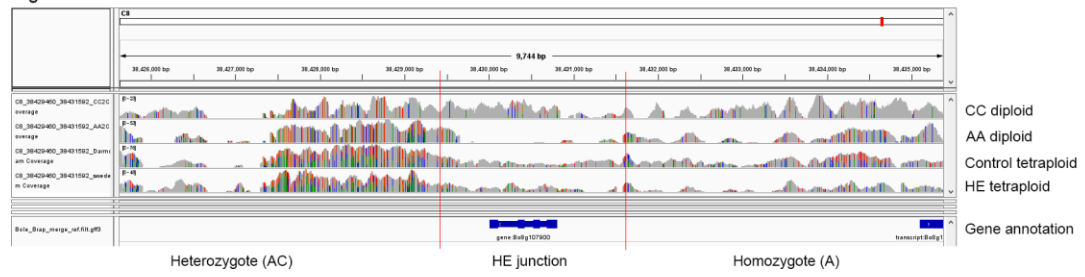

HE junction 75.

A genome

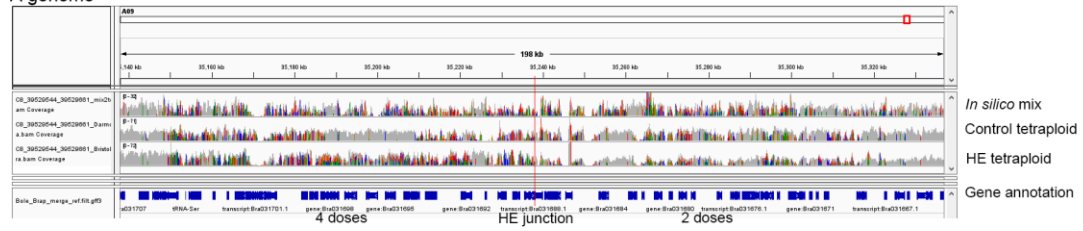

C genome

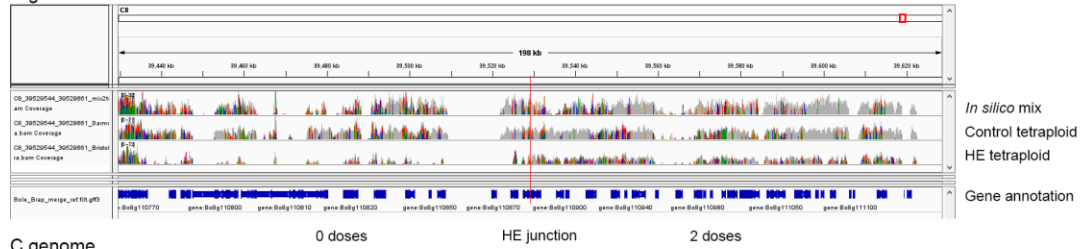

C genome

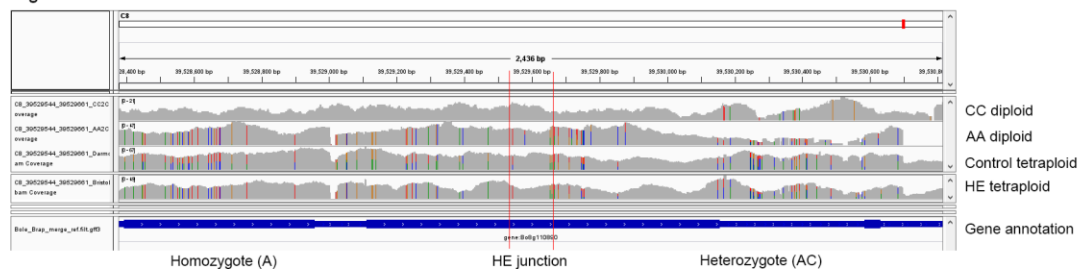

HE junction 76.

A genome

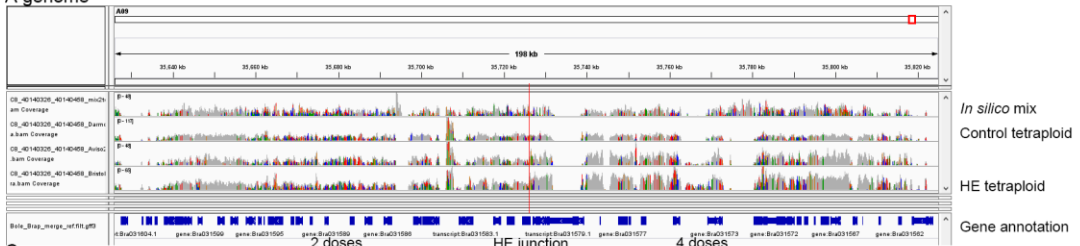

C genome

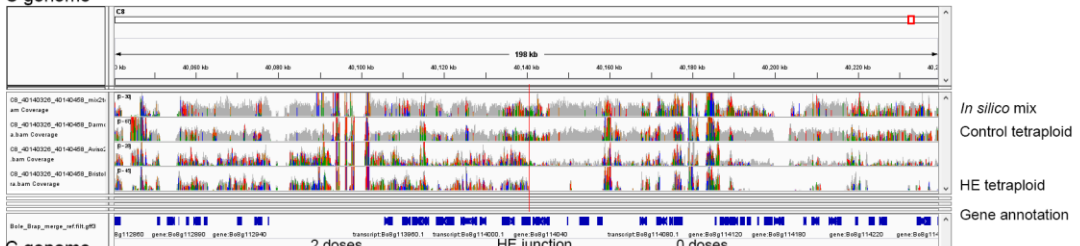

C genome

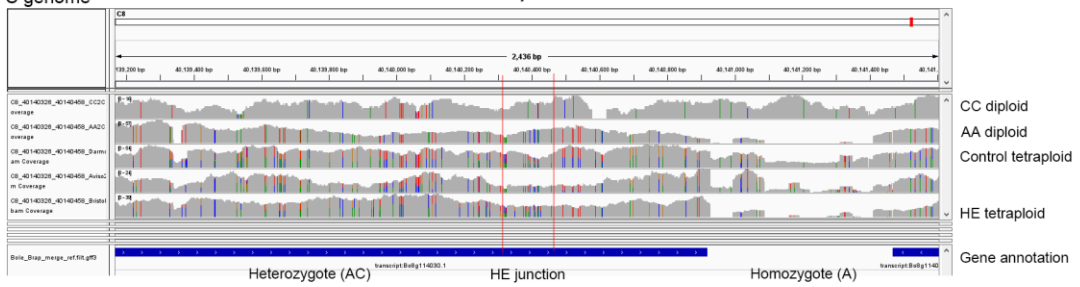

HE junction 77.

A genome

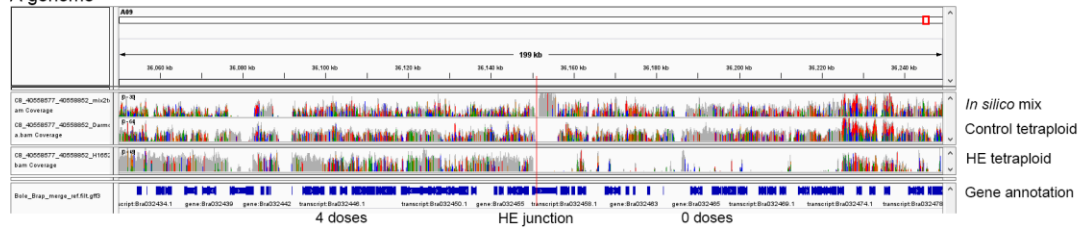

C genome

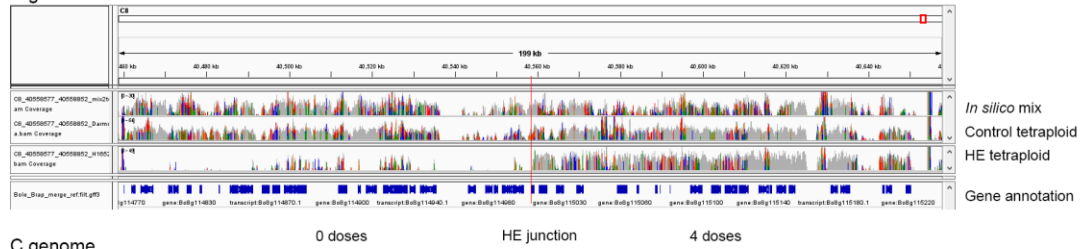

C genome

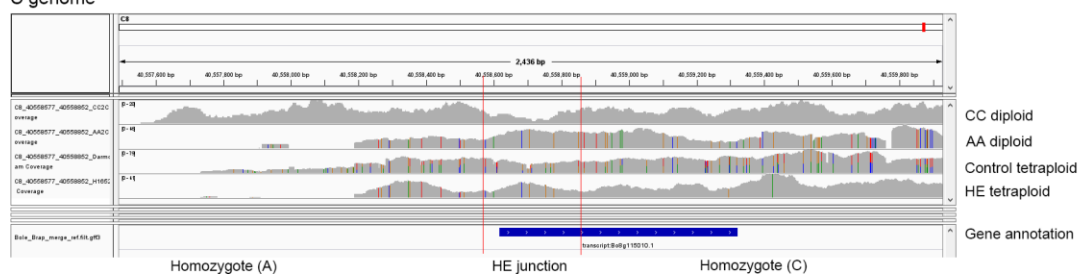

HE junction 78.

A genome

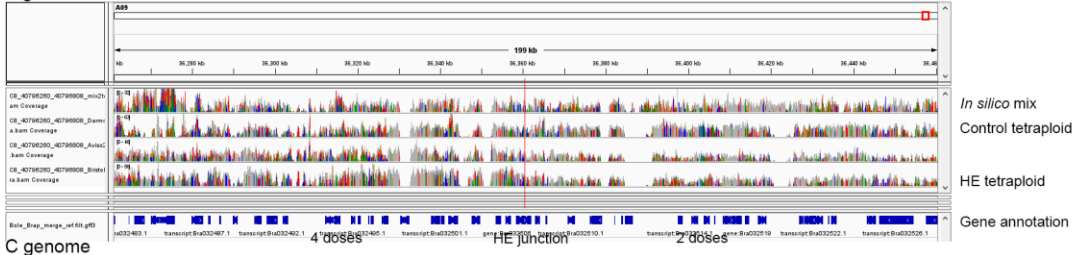

C genome

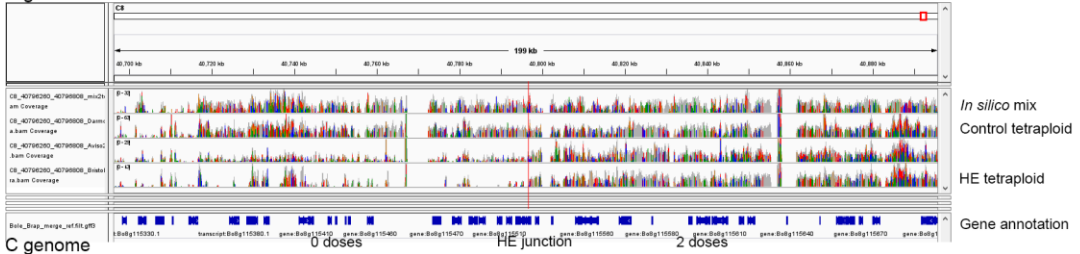

C genome

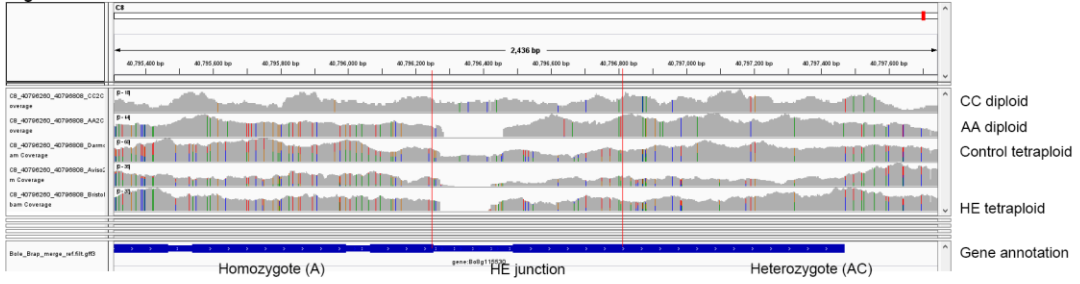

HE junction 79.

A genome

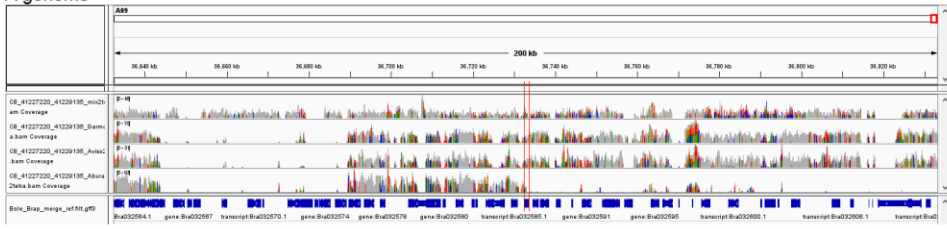

*In silico* mix  
Control tetraploid  
HE tetraploid  
Gene annotation

C genome

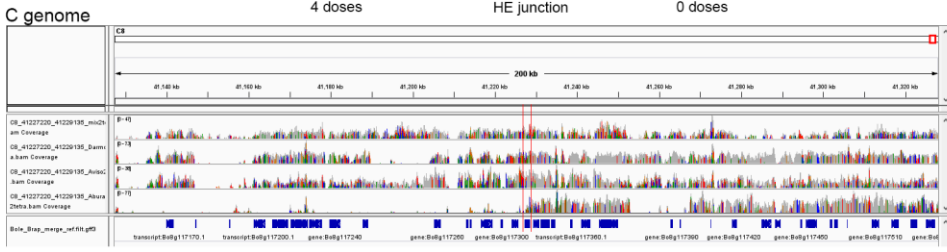

*In silico* mix  
Control tetraploid  
HE tetraploid  
Gene annotation

C genome

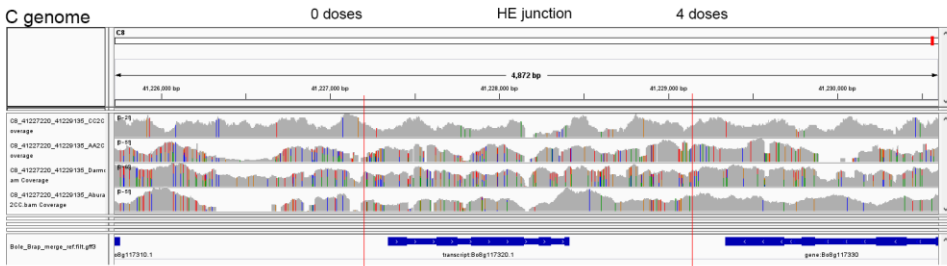

CC diploid  
AA diploid  
Control tetraploid  
HE tetraploid  
Gene annotation

Homozygote (A)

HE junction

Homozygote (C)

HE junction 80.

A genome

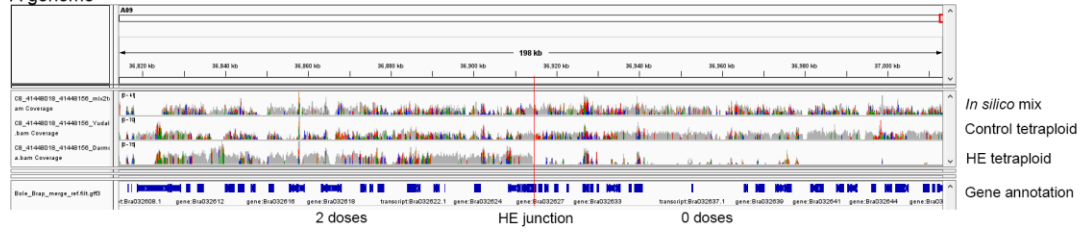

C genome

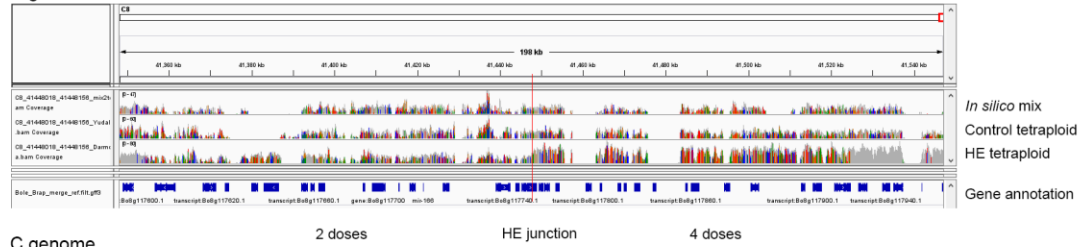

C genome

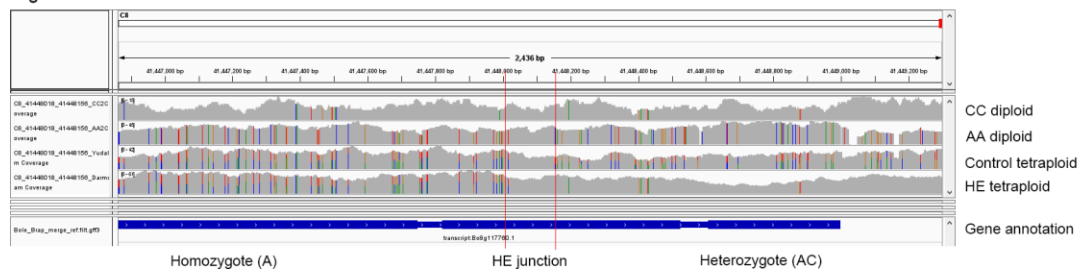

HE junction 81.

A genome

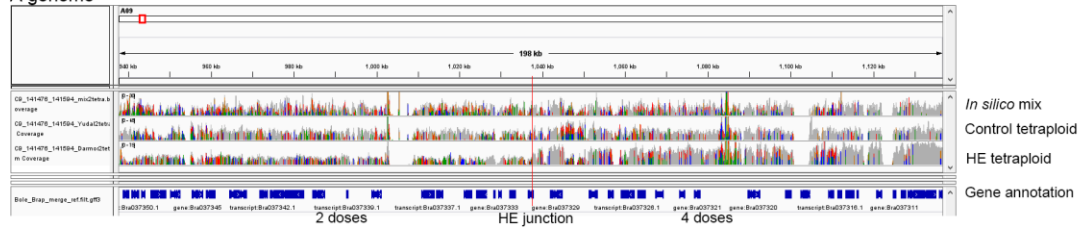

C genome

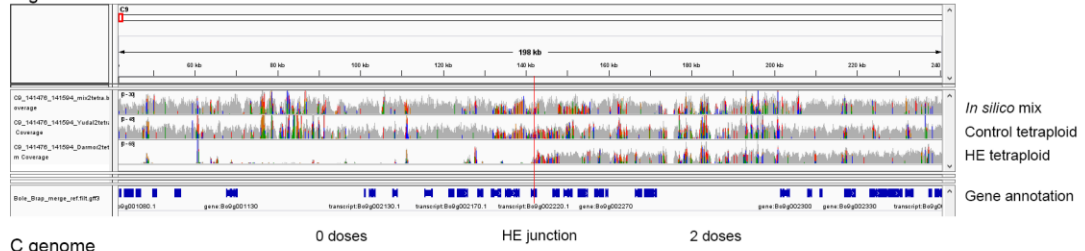

C genome

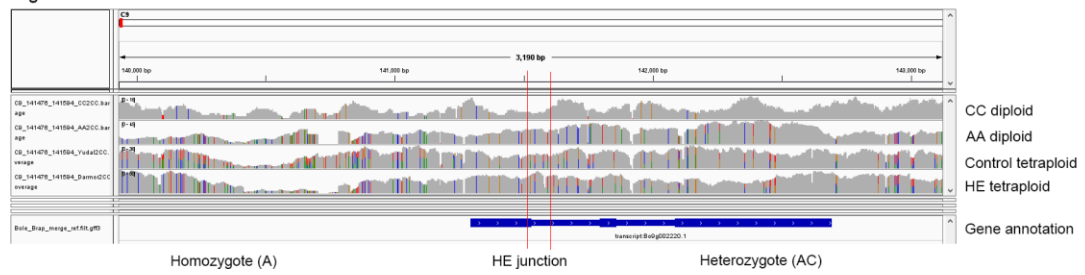

HE junction 82.



A genome

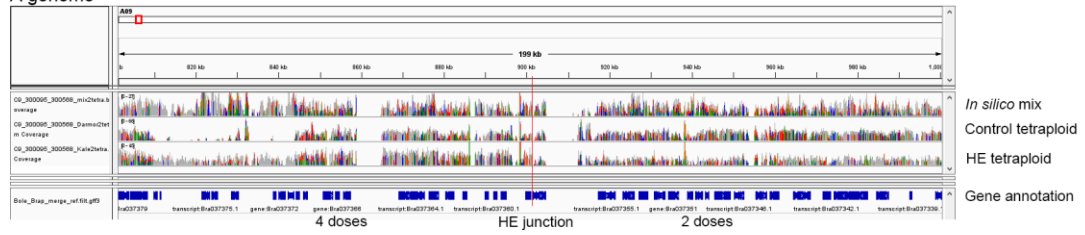

C genome

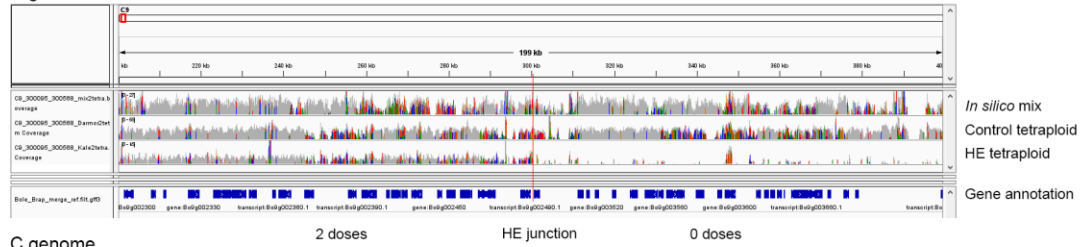

C genome

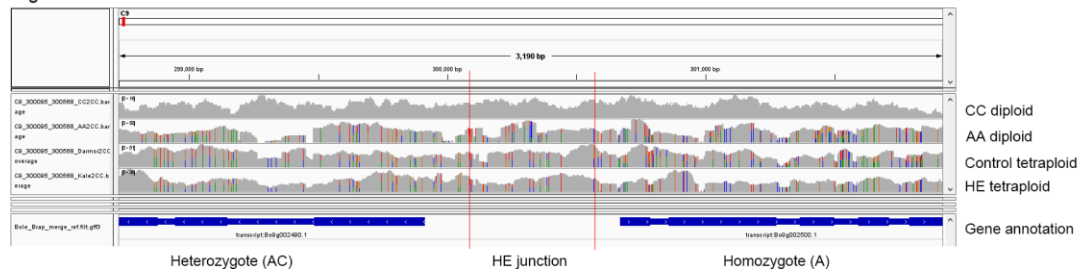

HE junction 83.

A genome

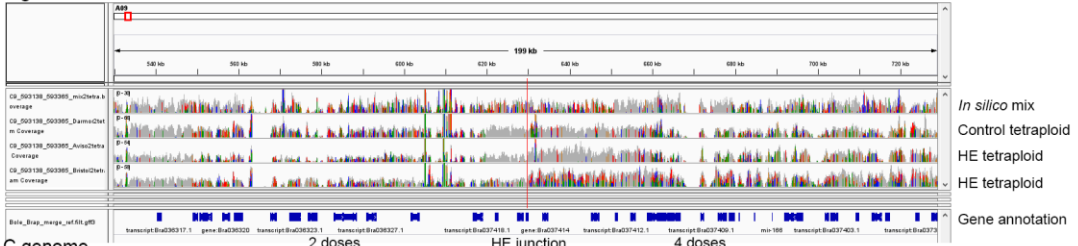

C genome

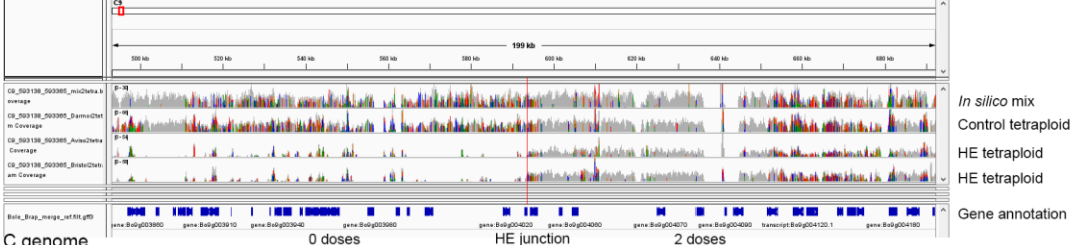

C genome

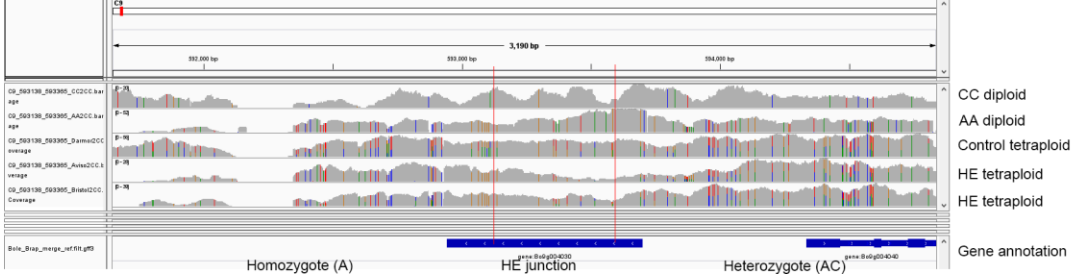

HE junction 84.

A genome

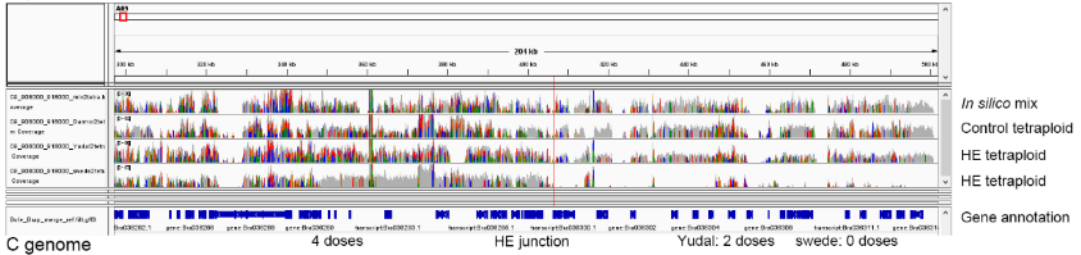

C genome

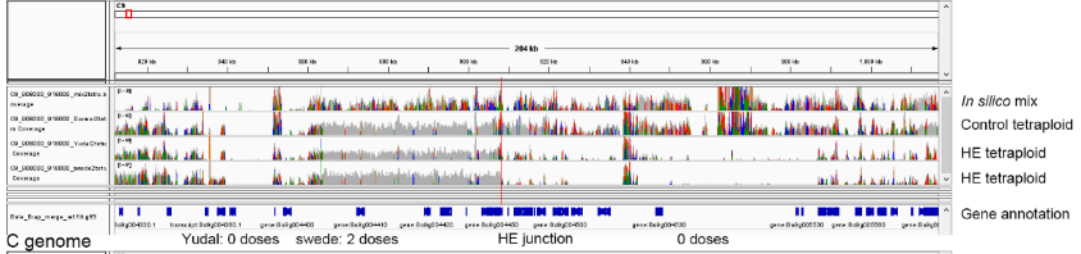

C genome

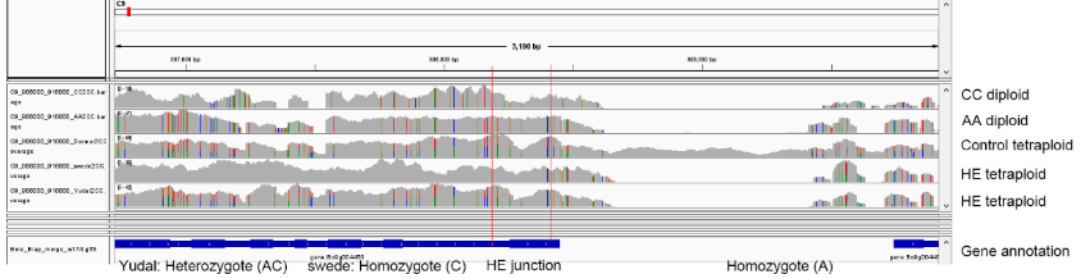

HE junction 85.

A genome

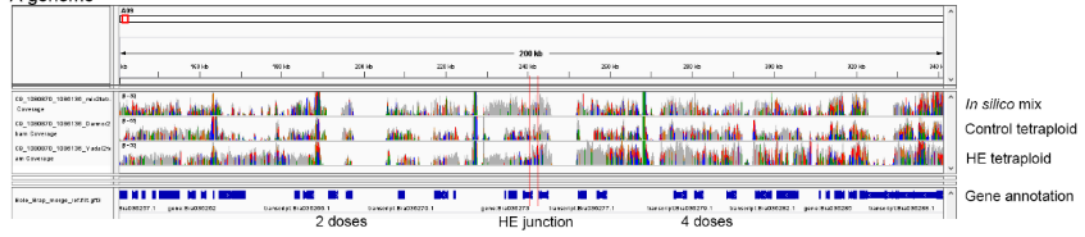

C genome

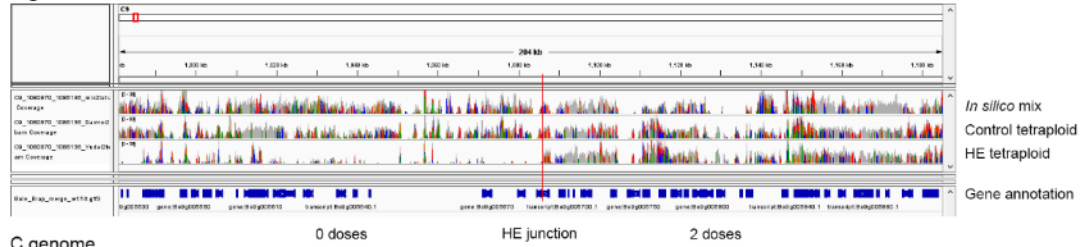

C genome

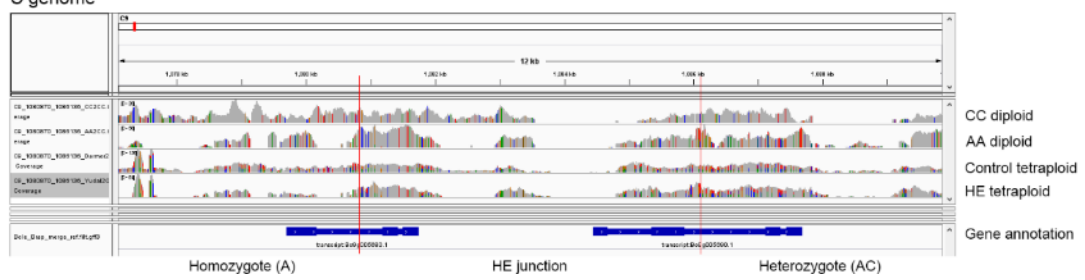

HE junction 86.

A genome

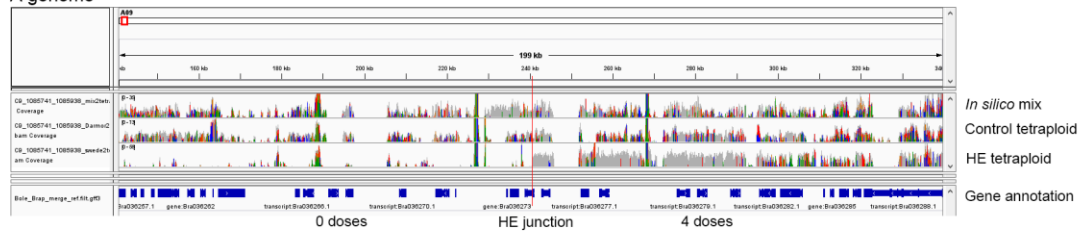

C genome

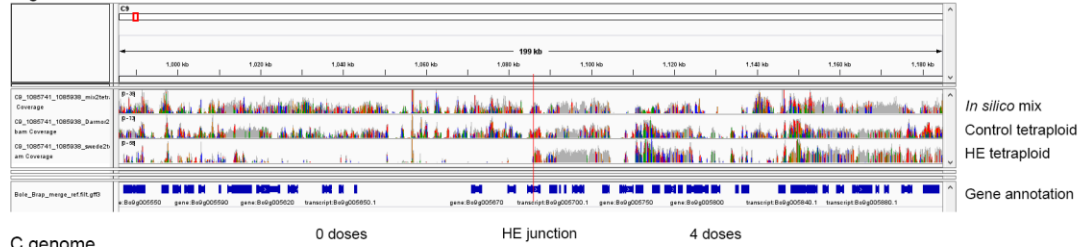

C genome

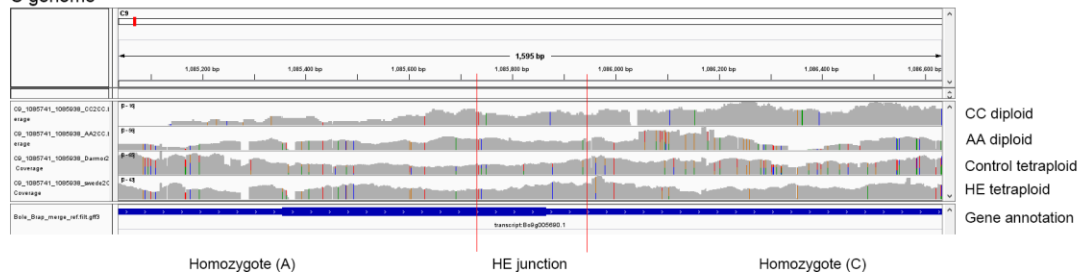

HE junction 87.

A genome

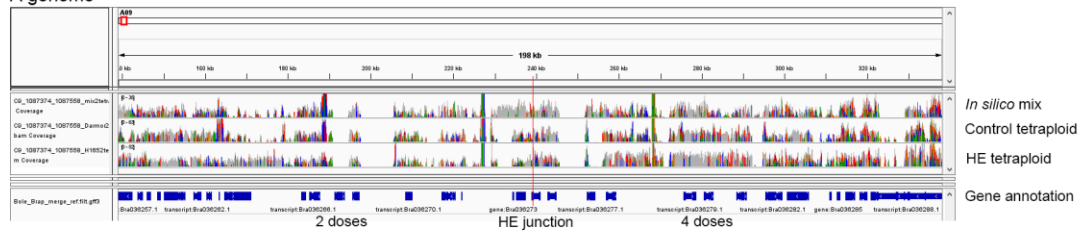

C genome

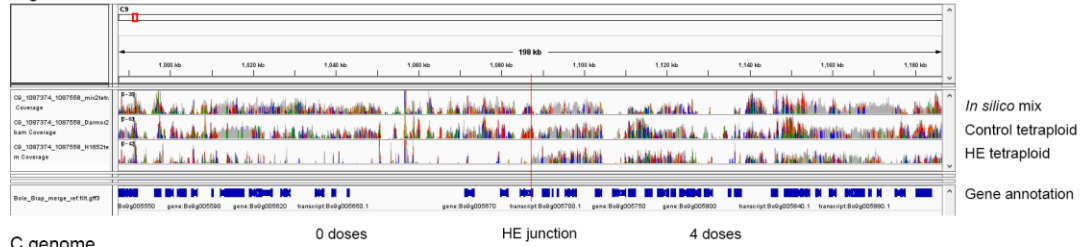

C genome

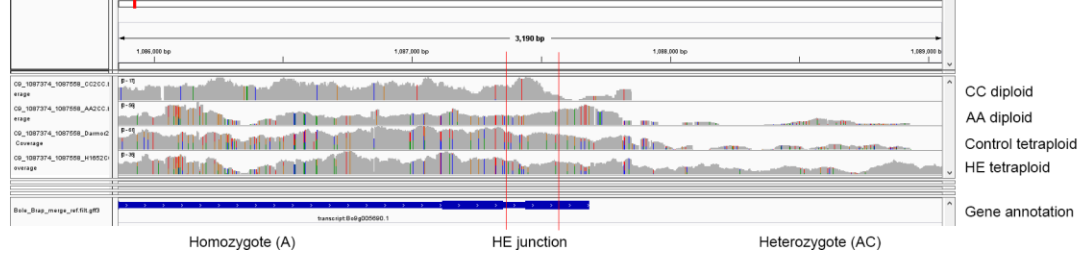

HE junction 88.

A genome

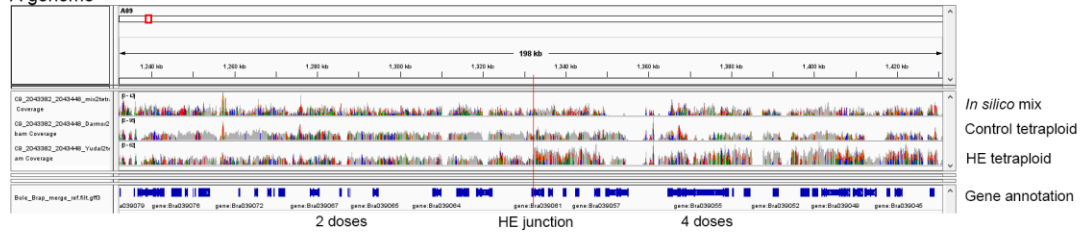

C genome

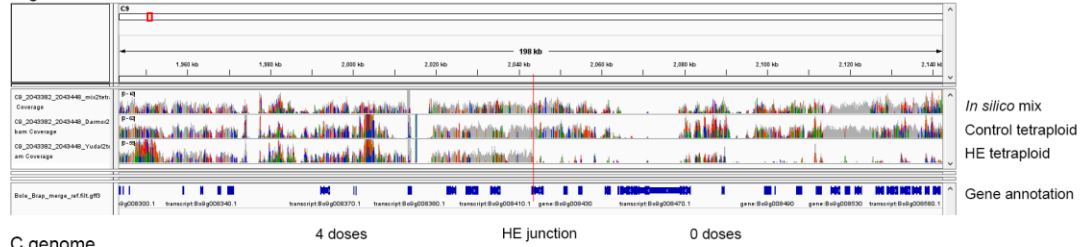

C genome

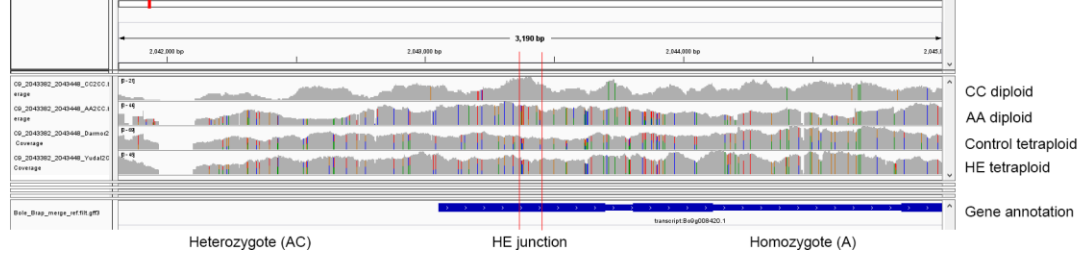

HE junction 89.

A genome

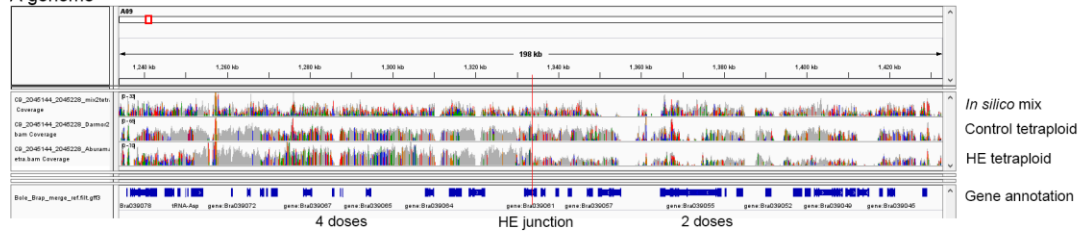

C genome

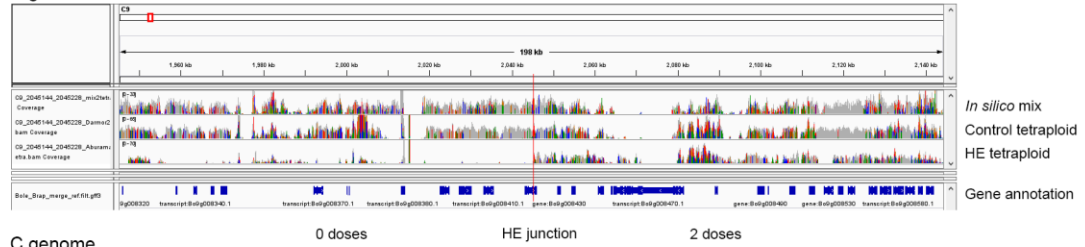

C genome

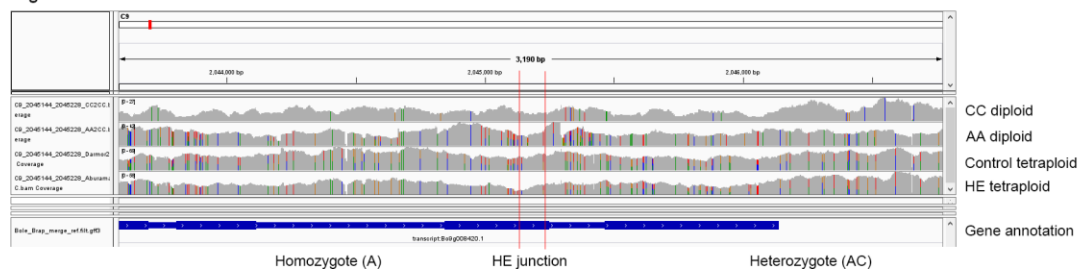

HE junction 90.



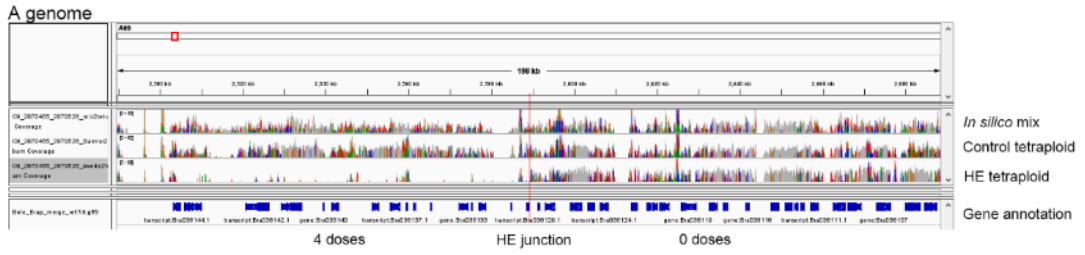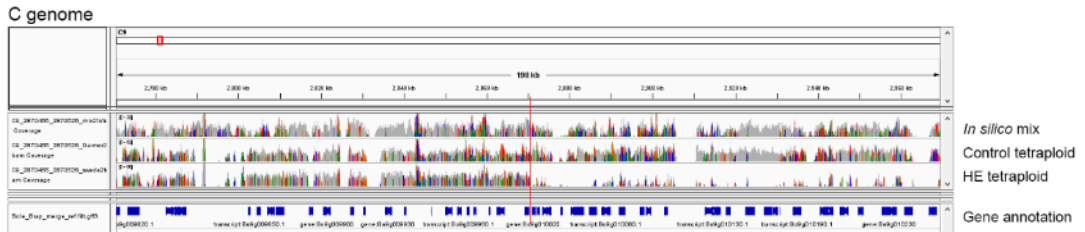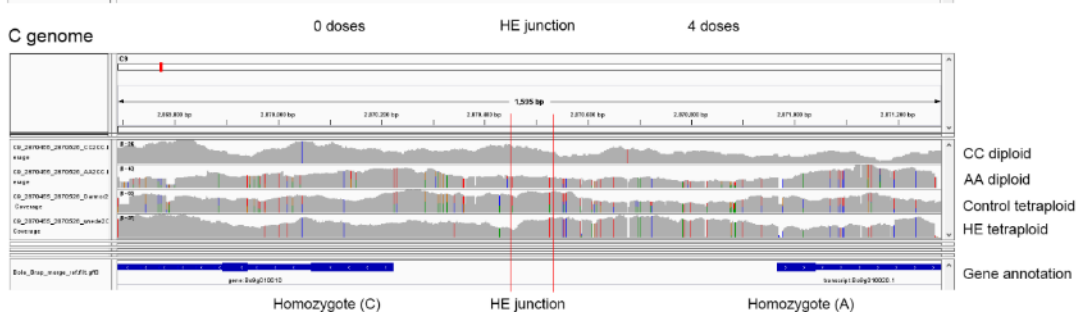

HE junction 91.

A genome

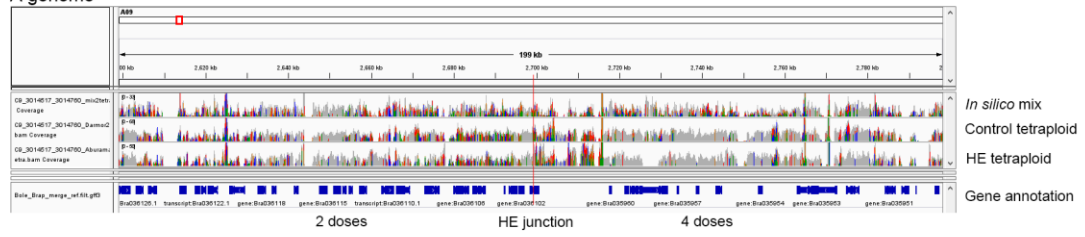

C genome

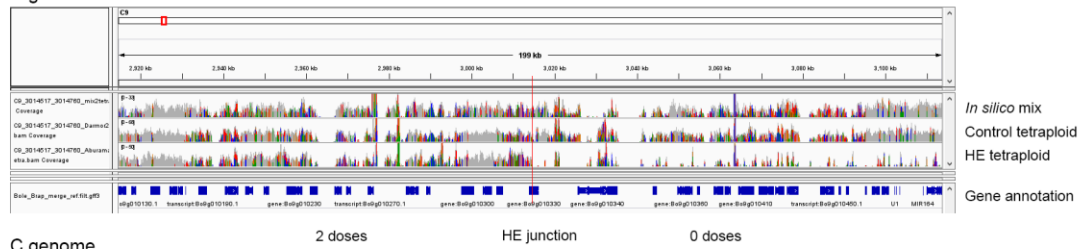

C genome

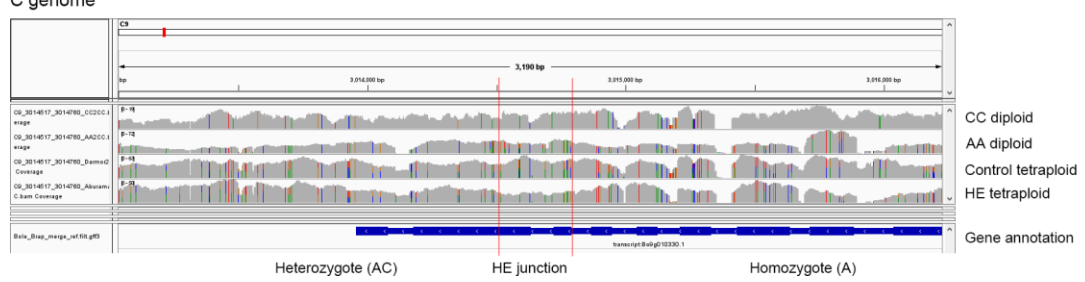

HE junction 92.

A genome

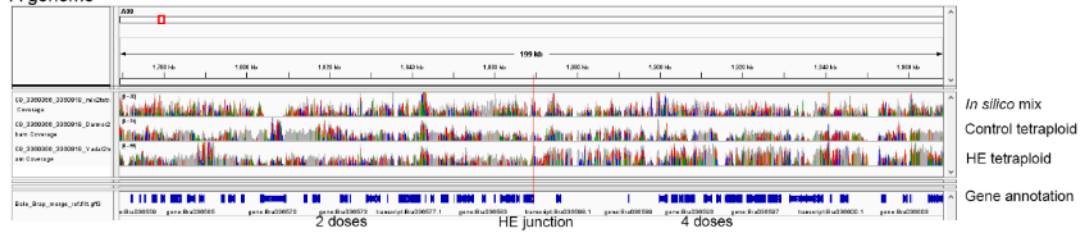

C genome

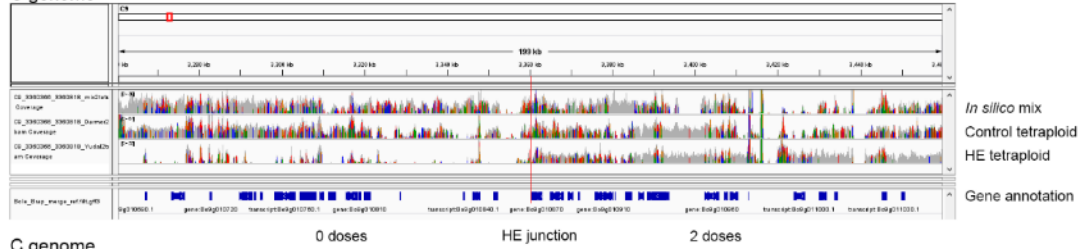

C genome

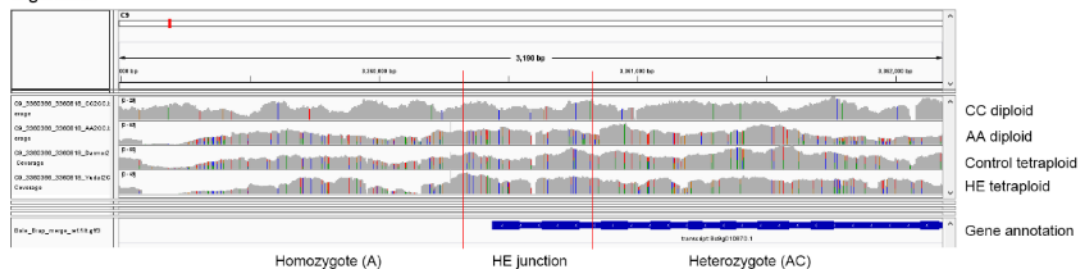

HE junction 93.

A genome

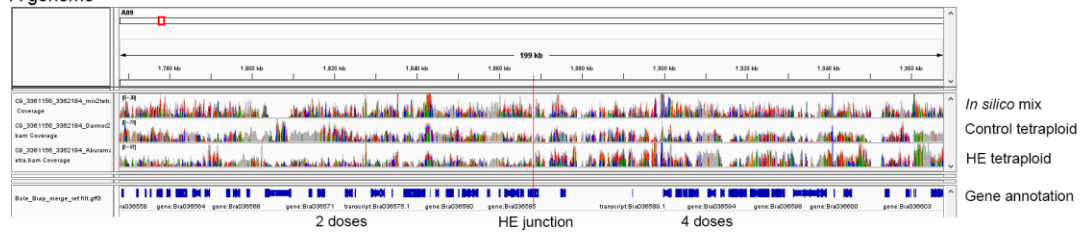

C genome

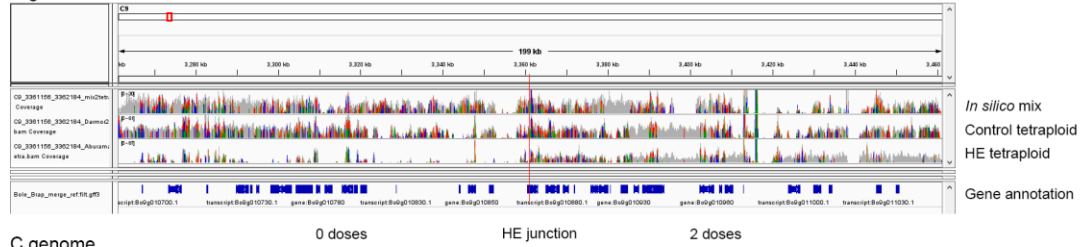

C genome

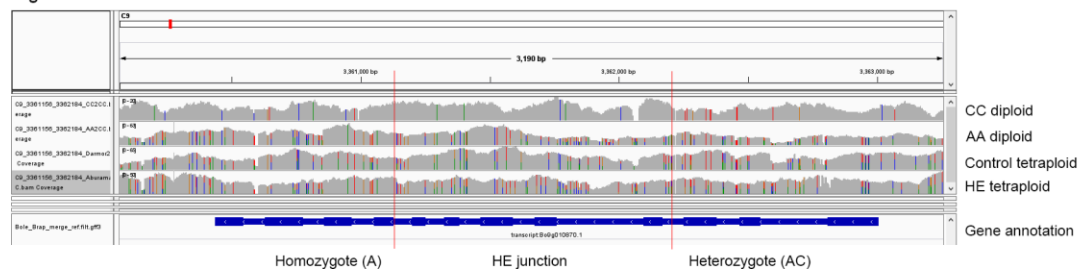

HE junction 94.

A genome

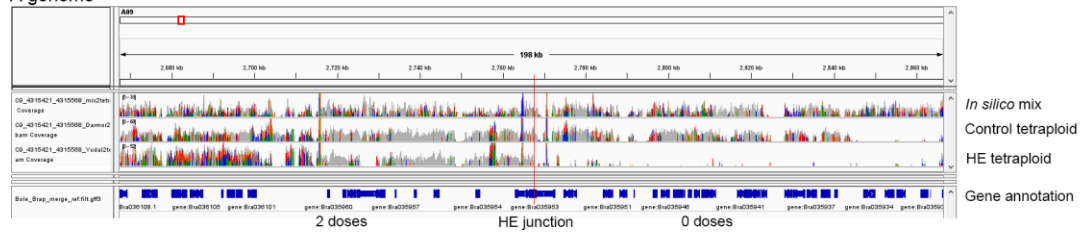

C genome

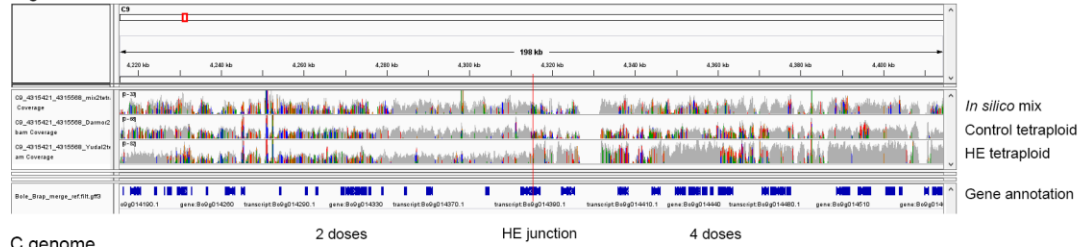

C genome

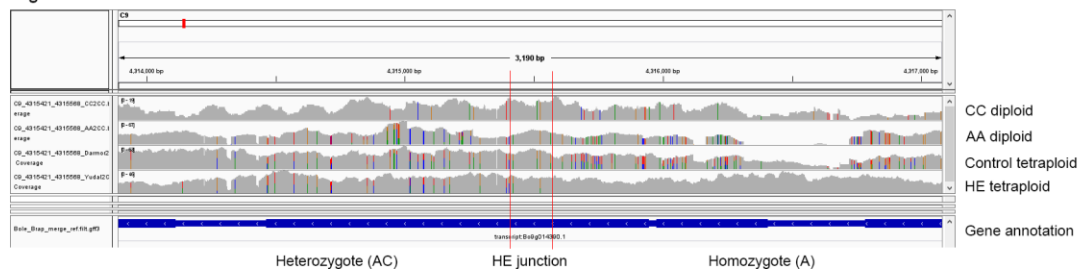

HE junction 95.

A genome

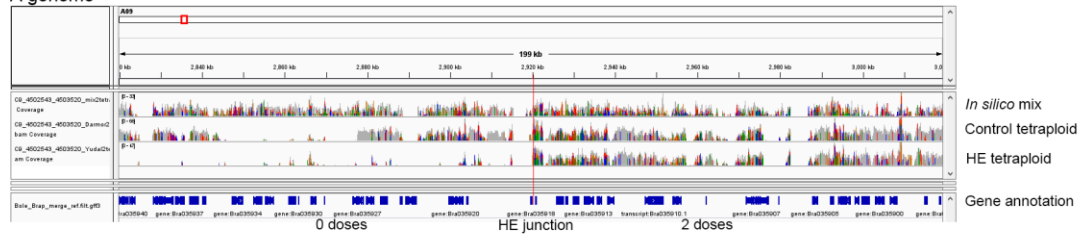

C genome

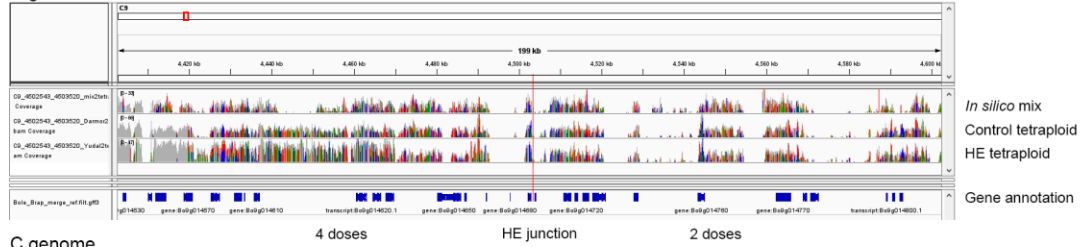

C genome

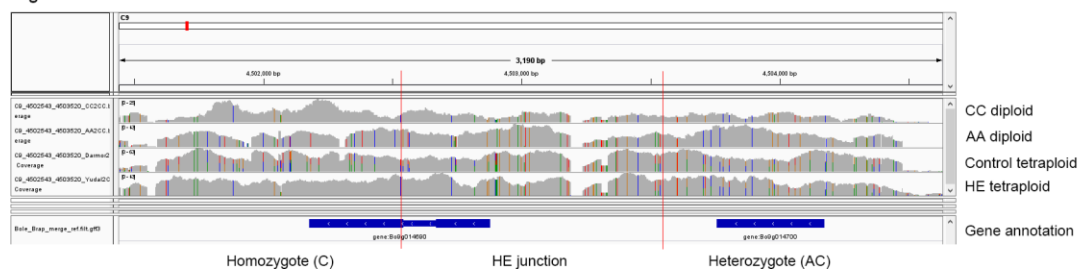

HE junction 96.

A genome

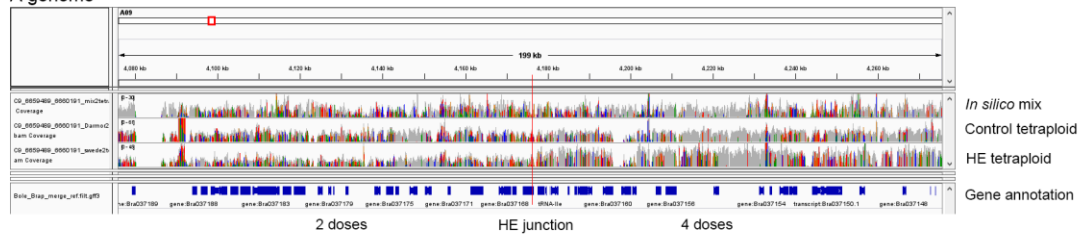

C genome

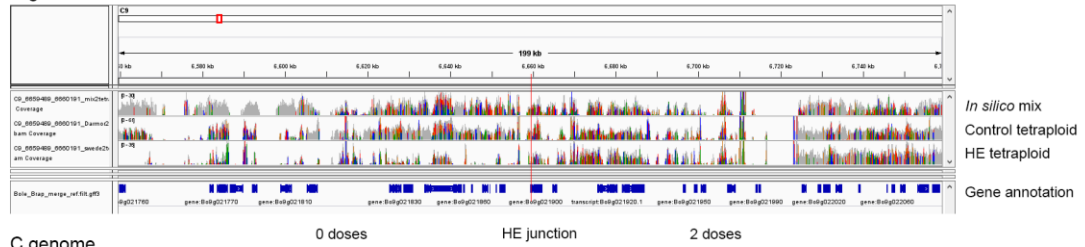

C genome

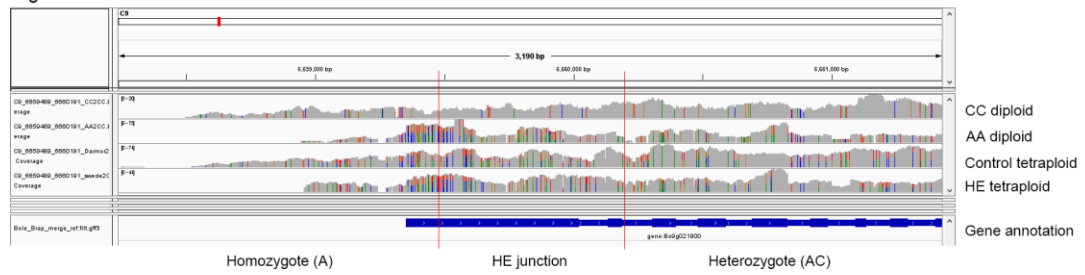

HE junction 97.

A genome

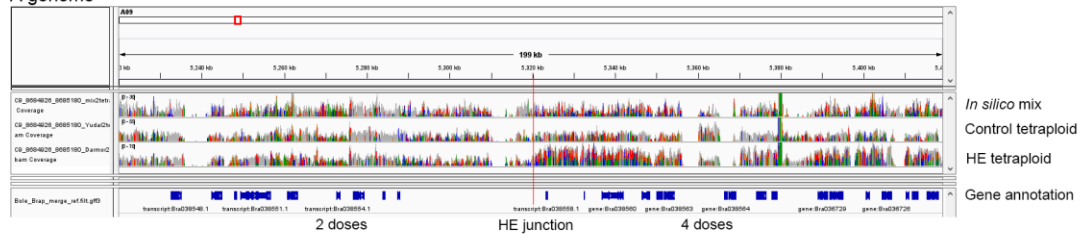

C genome

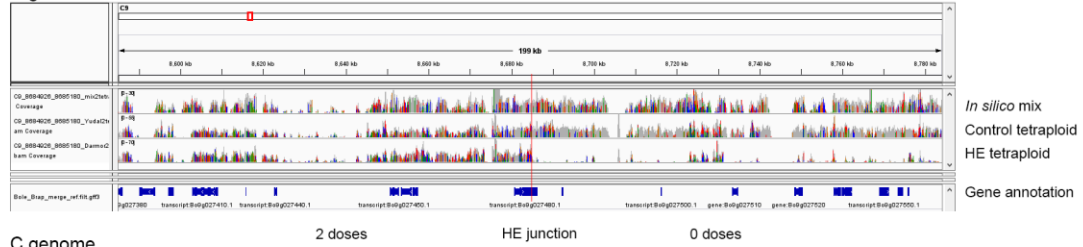

C genome

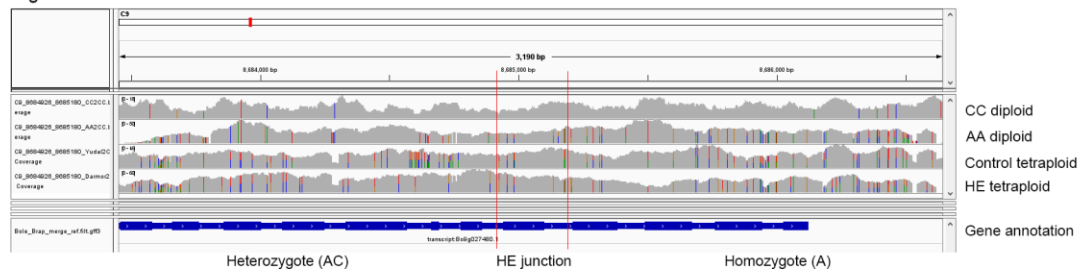

HE junction 98.



A genome

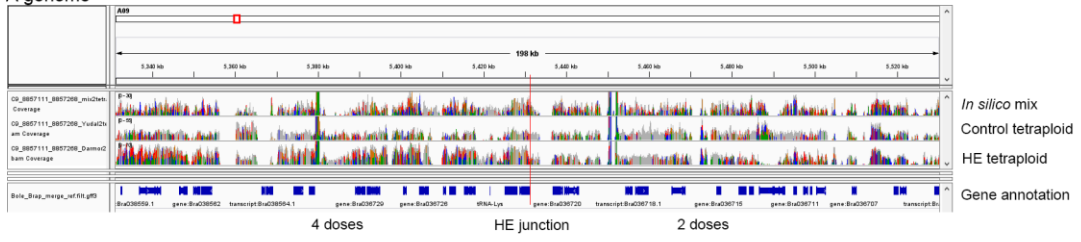

C genome

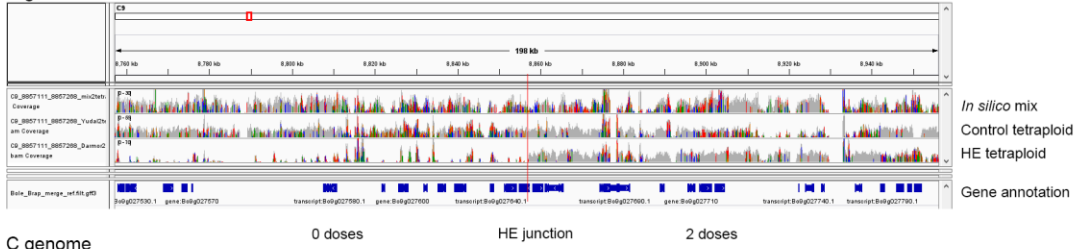

C genome

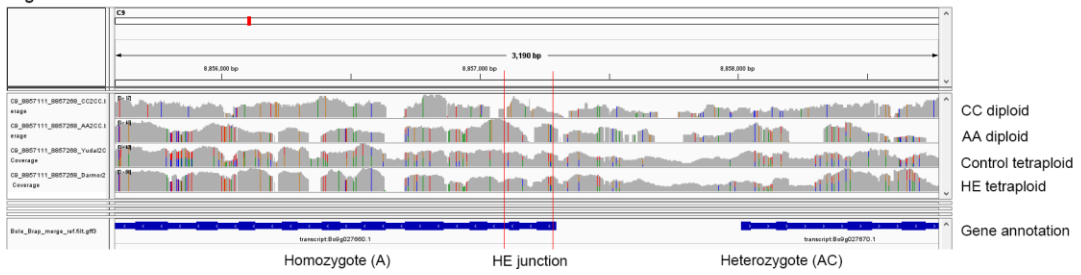

HE junction 99.

A genome

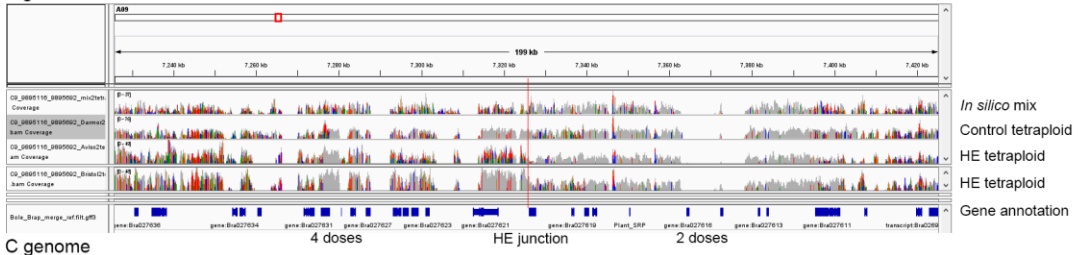

C genome

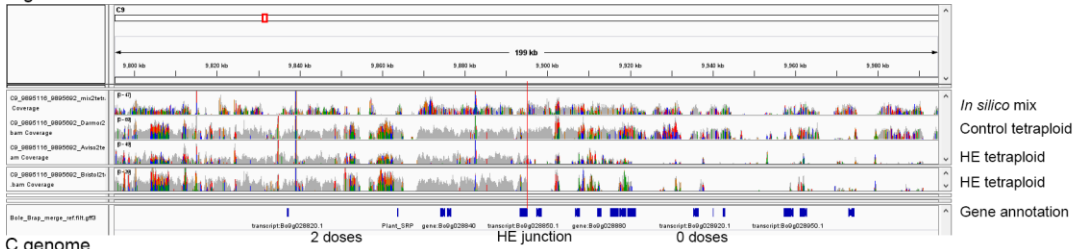

C genome

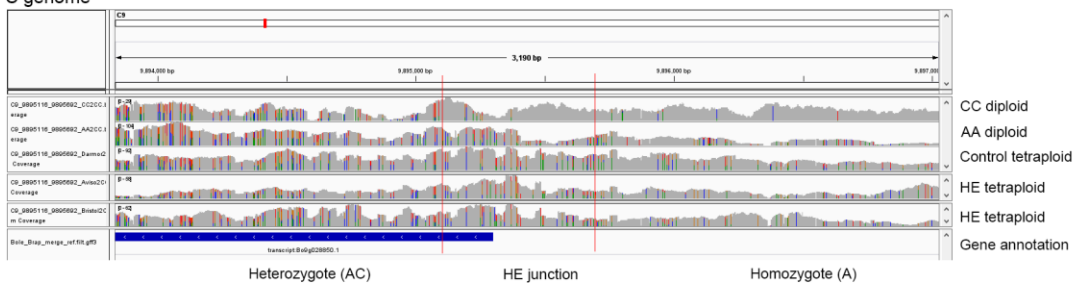

HE junction 100.

A genome

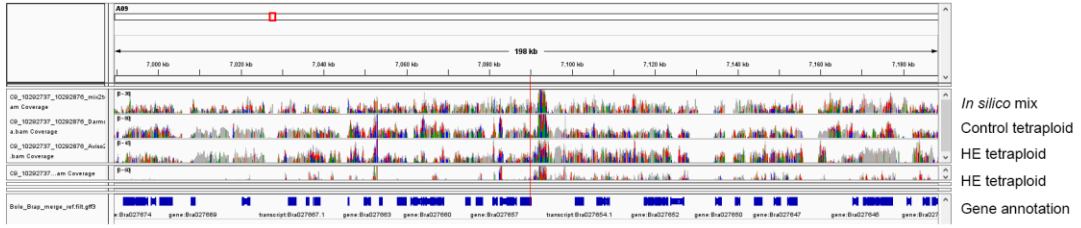

C genome

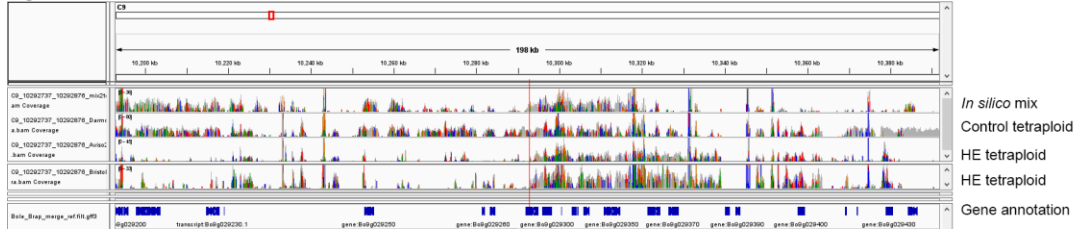

C genome

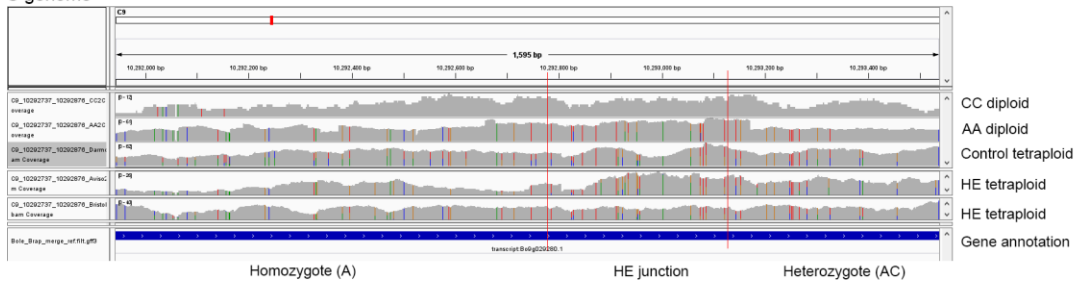

HE junction 101.

A genome

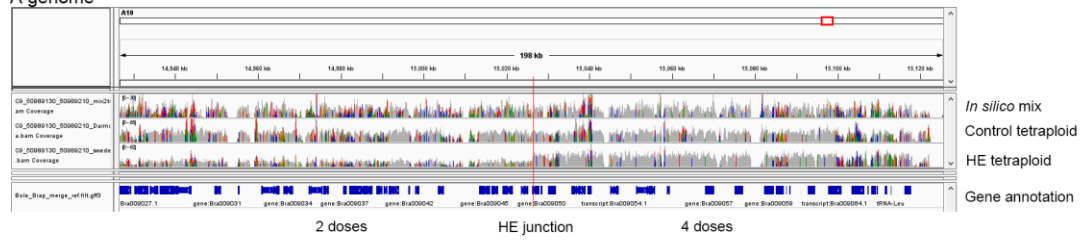

C genome

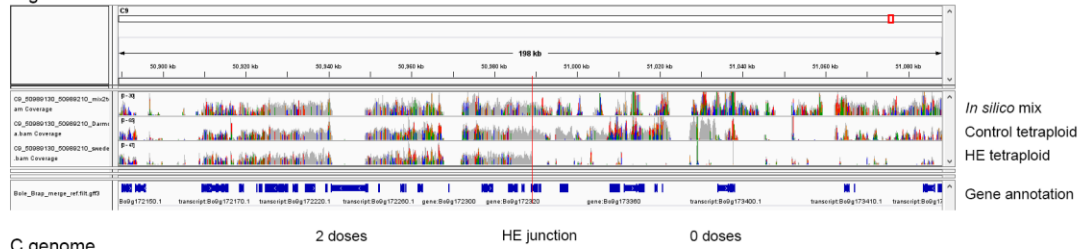

C genome

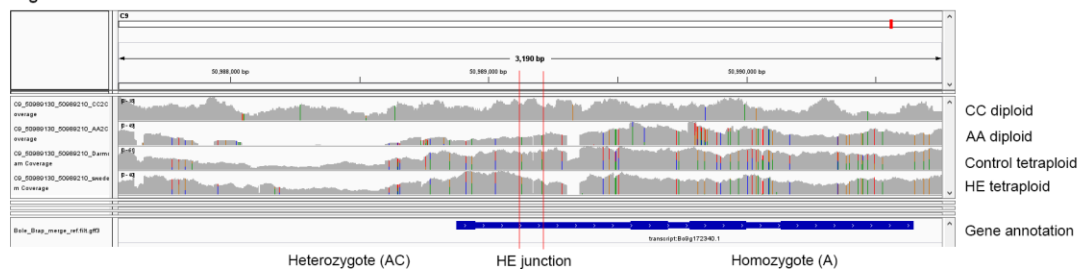

HE junction 102.

A genome

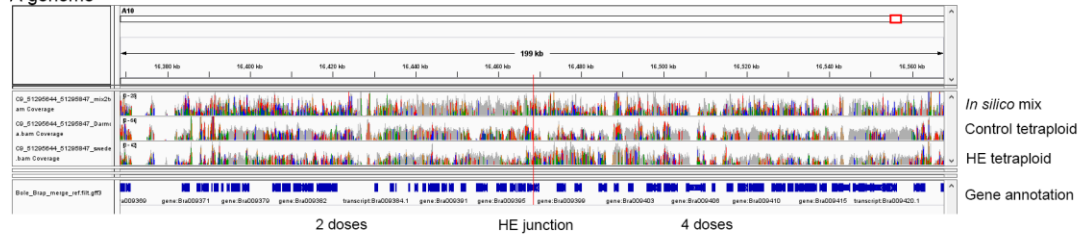

C genome

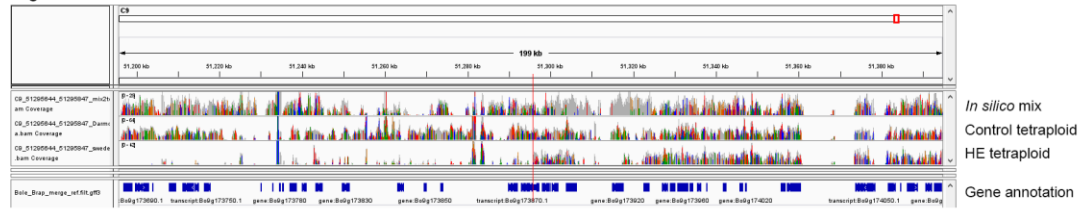

C genome

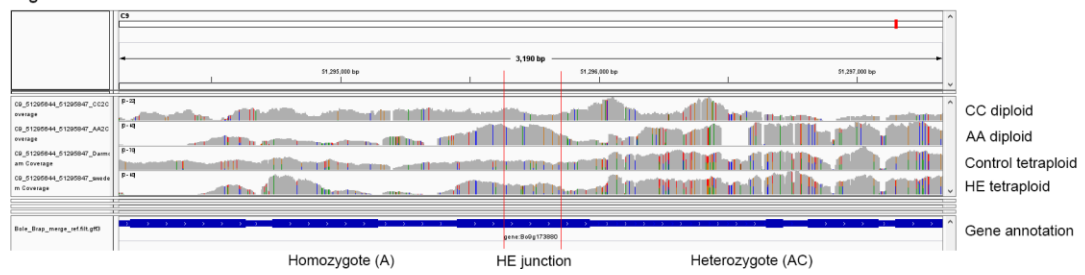

HE junction 103.

A genome

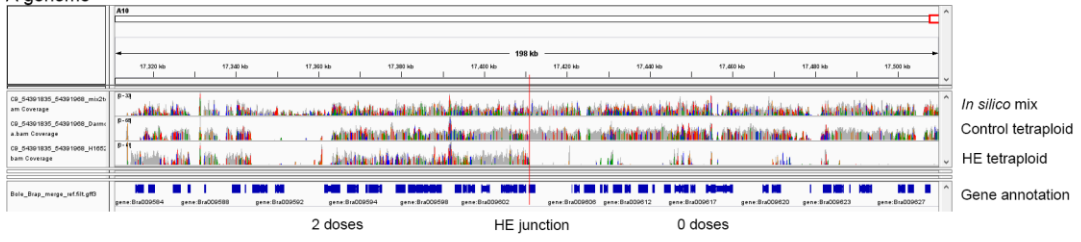

C genome

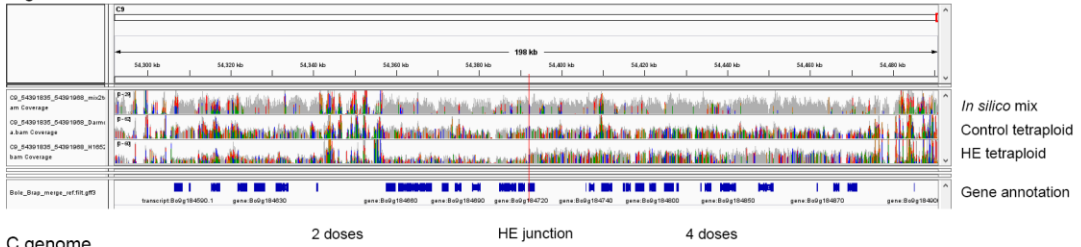

C genome

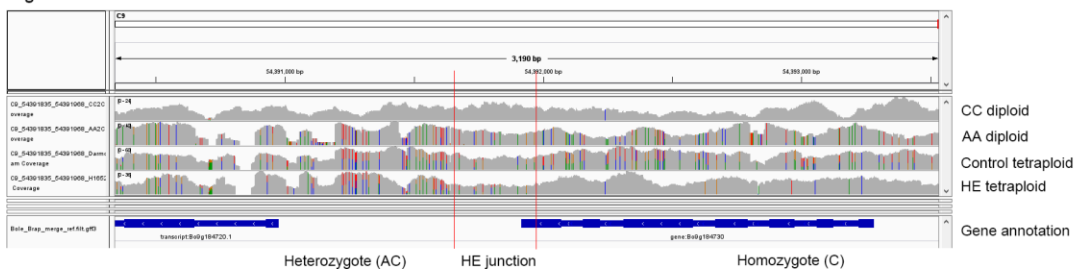

HE junction 104.

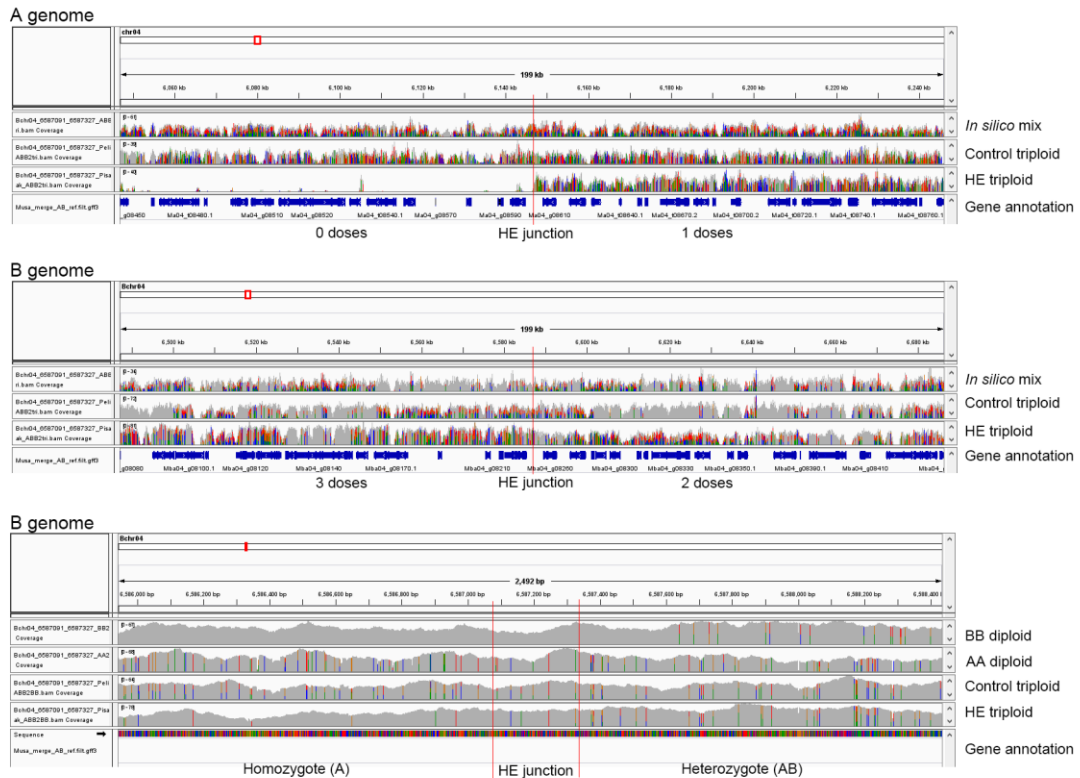

Fig. S16. IGV panels of HE junction regions in triploid banana (AAB and ABB, 21 junctions). The top and middle panels show the sequencing depth around HE junctions in both A and B subgenomes, respectively. Red lines indicate the position of HE junctions and genome dosages are shown on both sides of HE junction. The bottom panel shows the genotypes (homozygote or heterozygote) around HE junction (region between red lines) based on SNP genotyping.

A genome

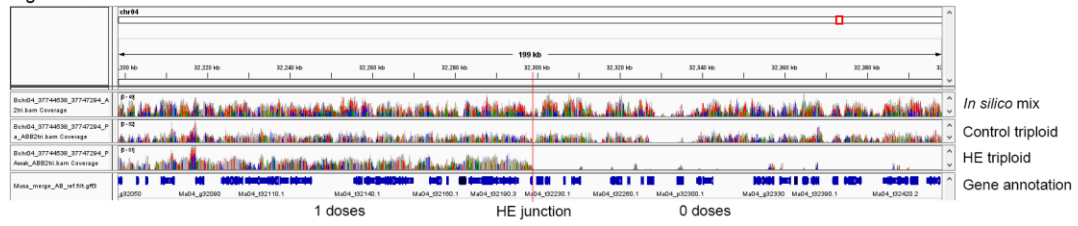

B genome

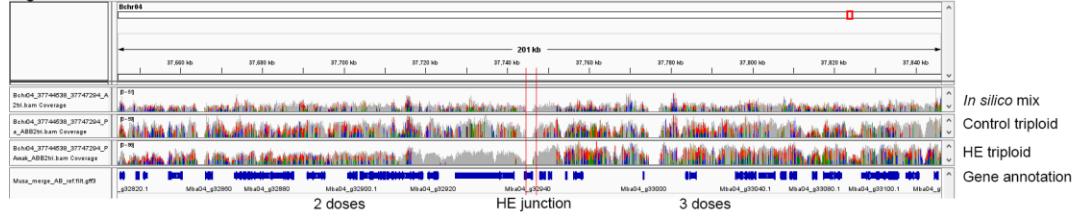

B genome

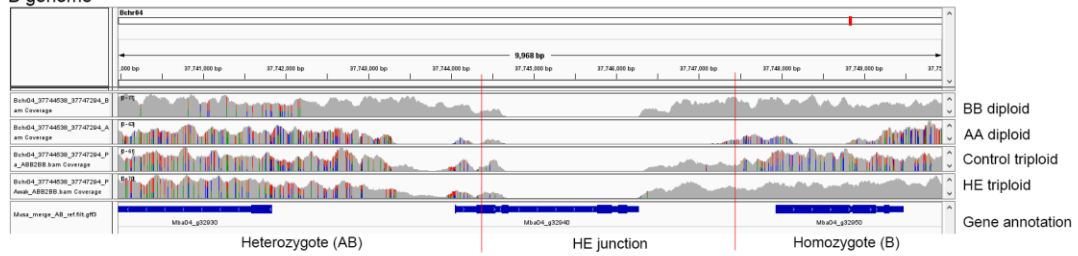

HE junction 2.



A genome

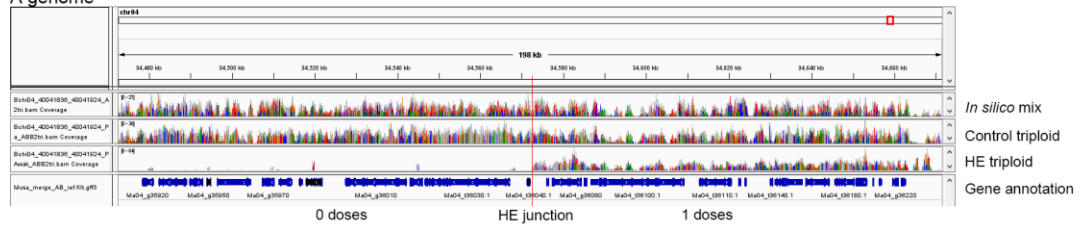

B genome

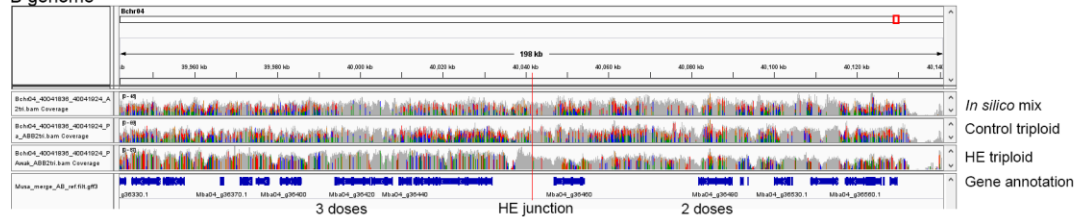

B genome

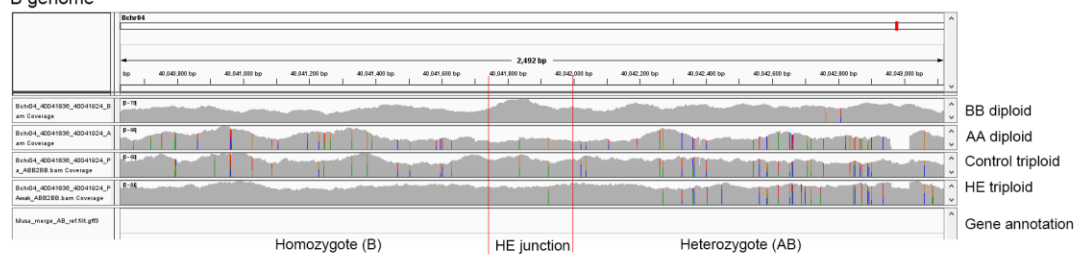

HE junction 3.

A genome

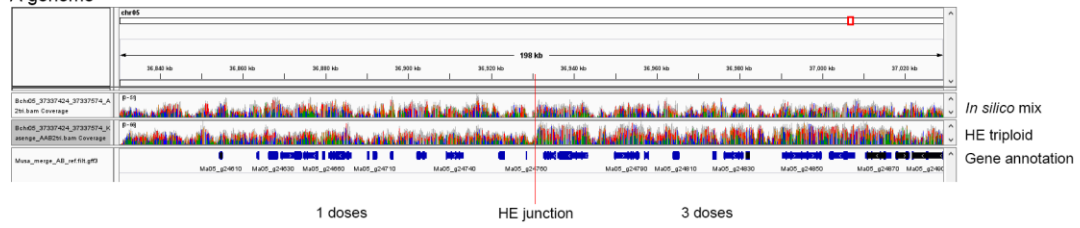

B genome

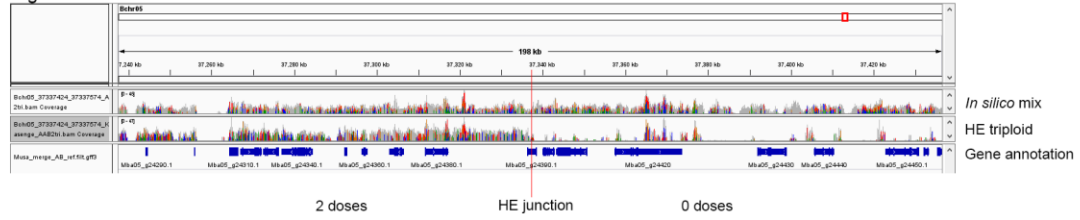

B genome

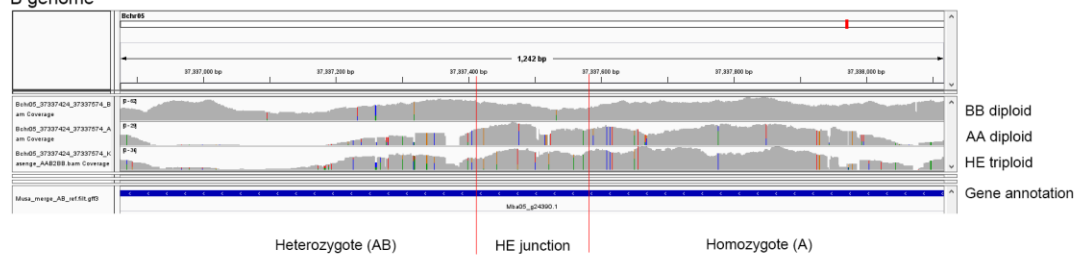

HE junction 4.

A genome

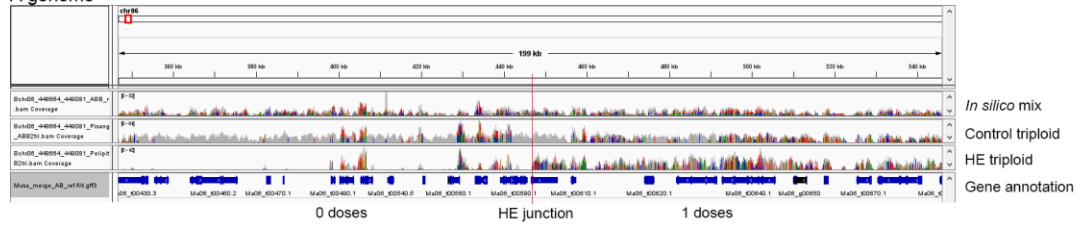

B genome

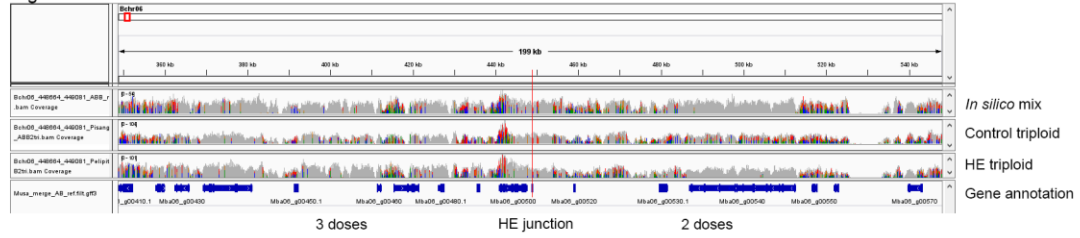

B genome

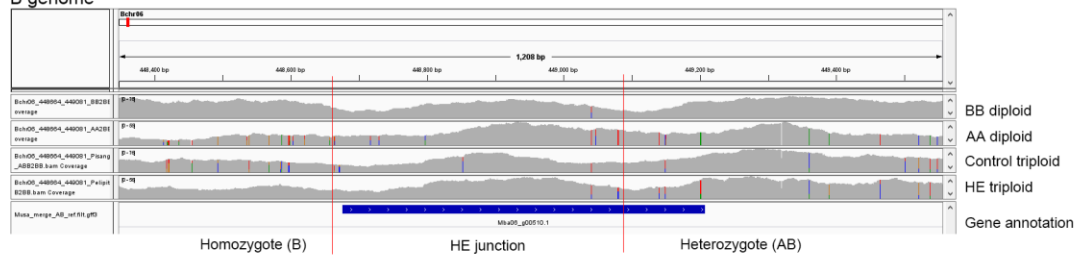

HE junction 5.

A genome

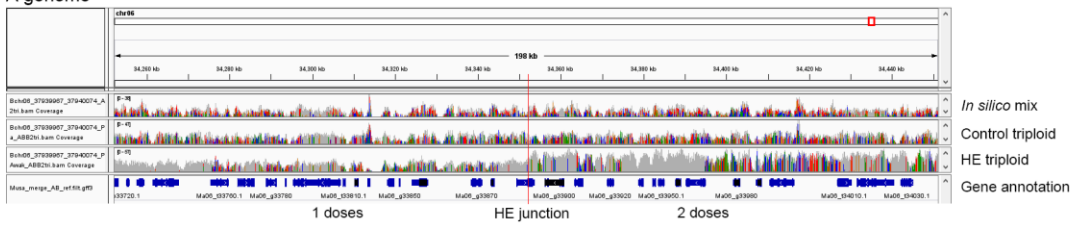

B genome

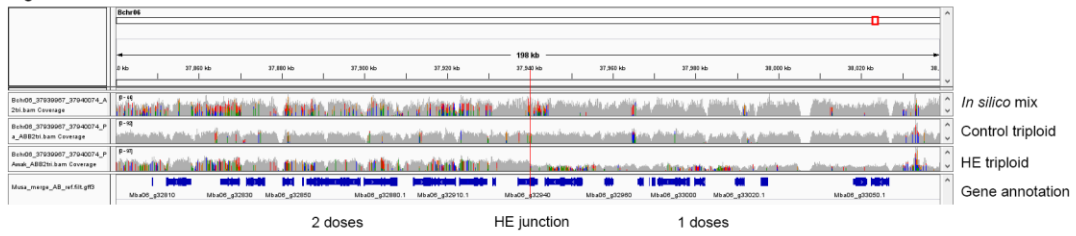

B genome

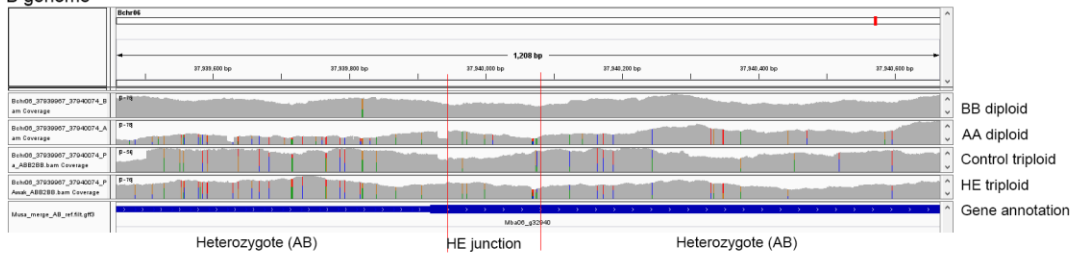

HE junction 6.

A genome

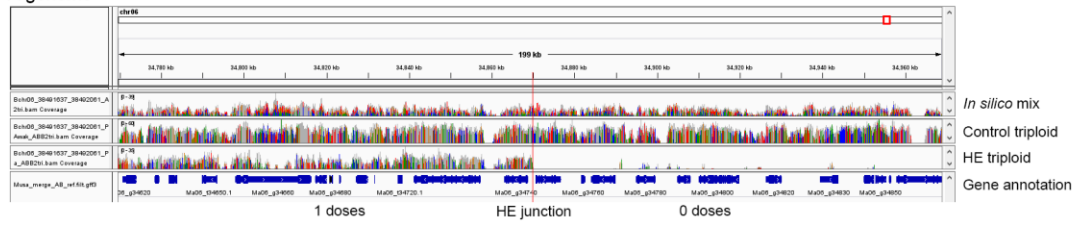

B genome

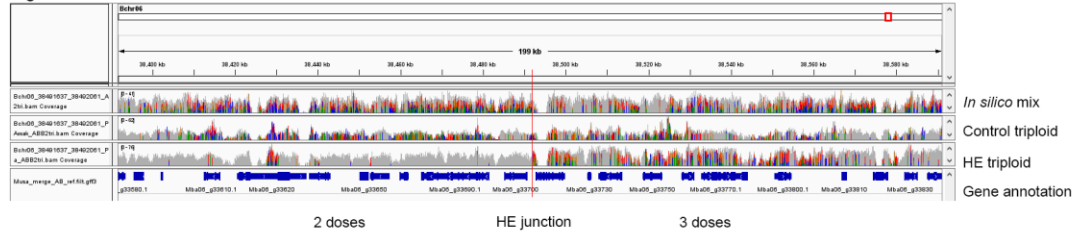

B genome

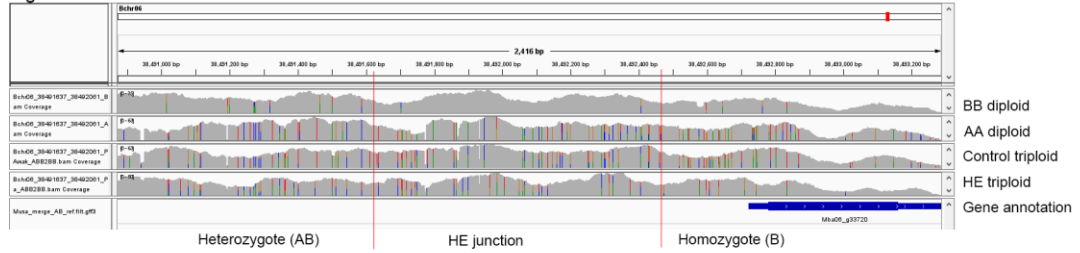

HE junction 7.

A genome

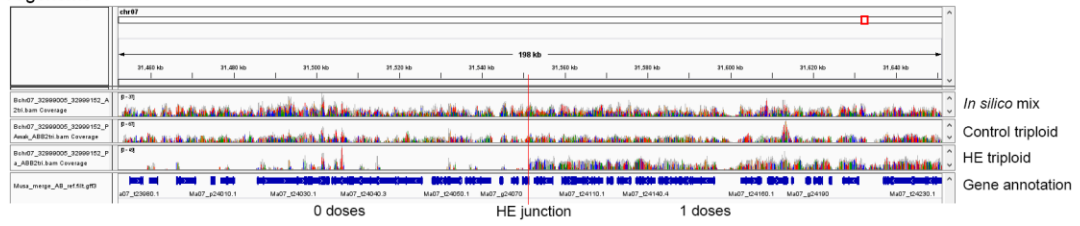

B genome

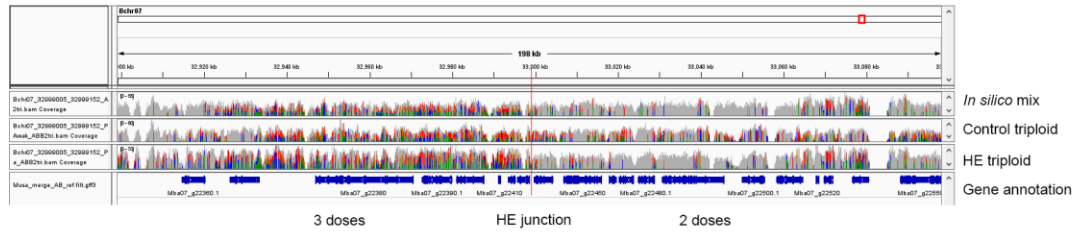

B genome

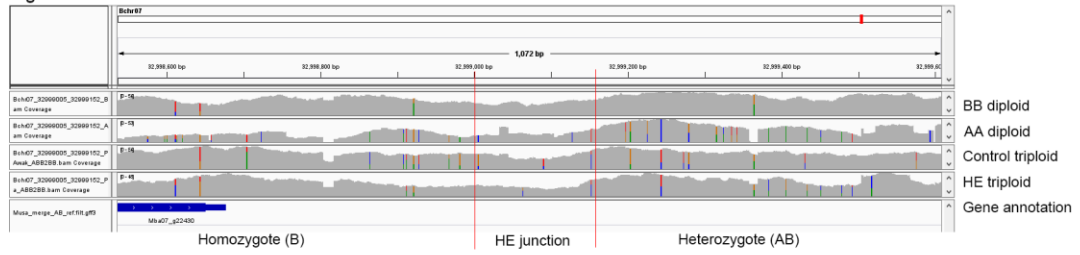

HE junction 8.

A genome

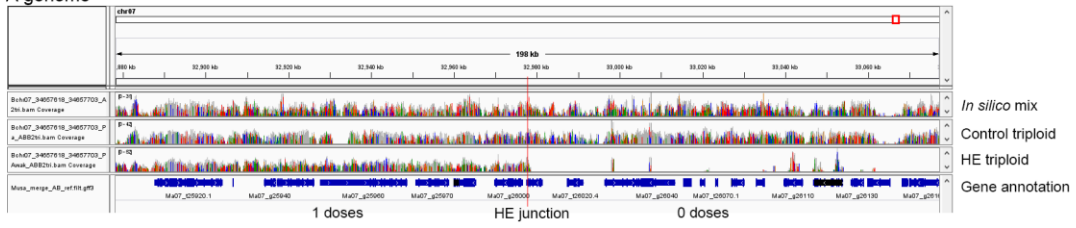

B genome

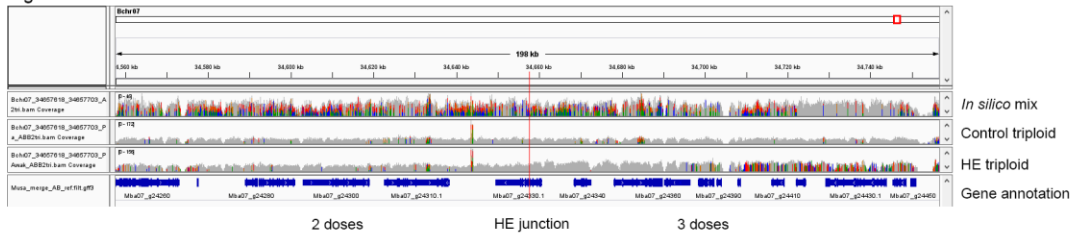

B genome

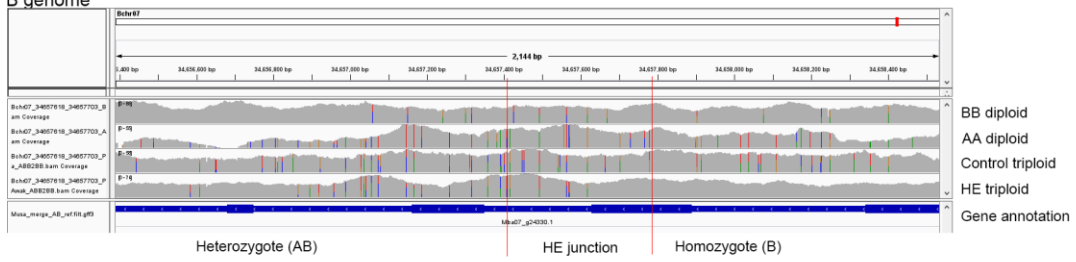

HE junction 9.

A genome

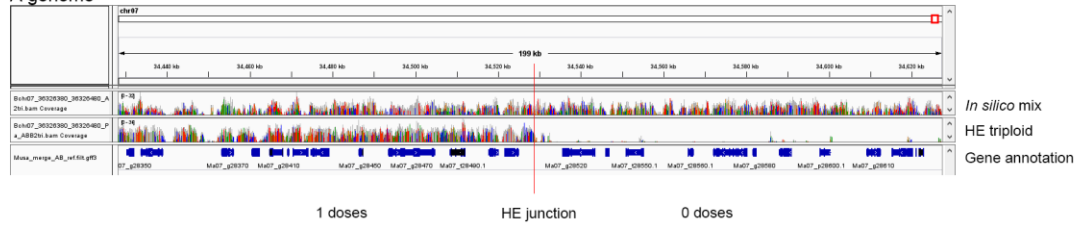

B genome

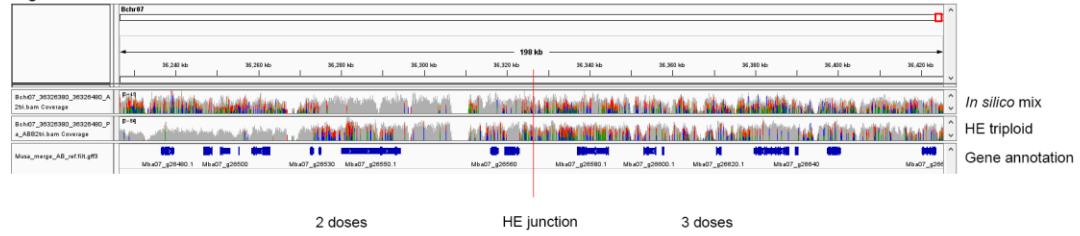

B genome

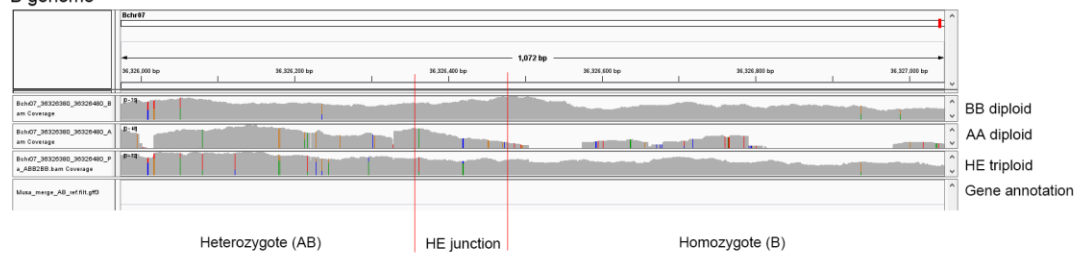

HE junction 10.



A genome

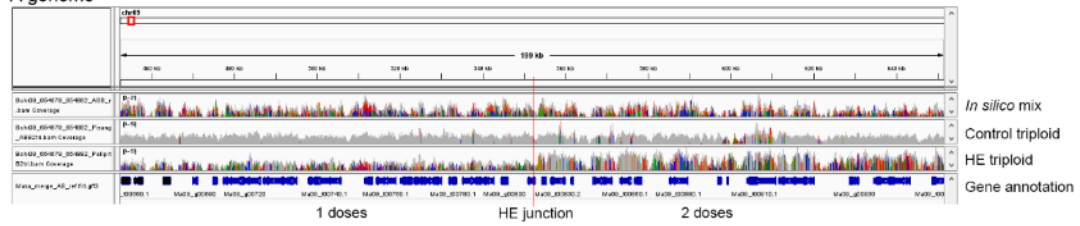

B genome

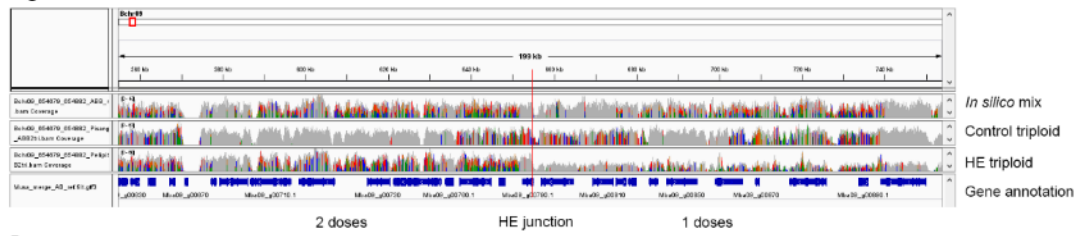

B genome

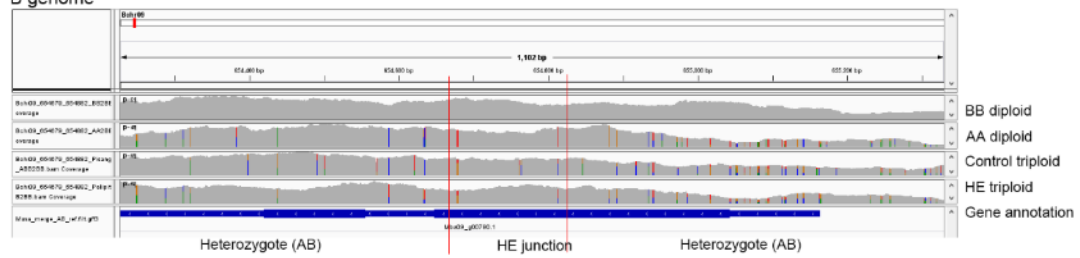

HE junction 11.

A genome

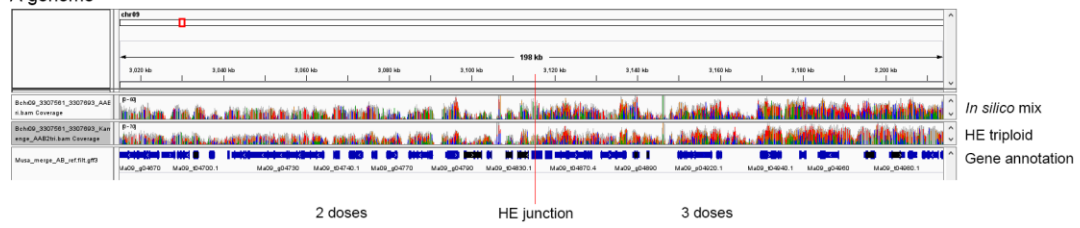

B genome

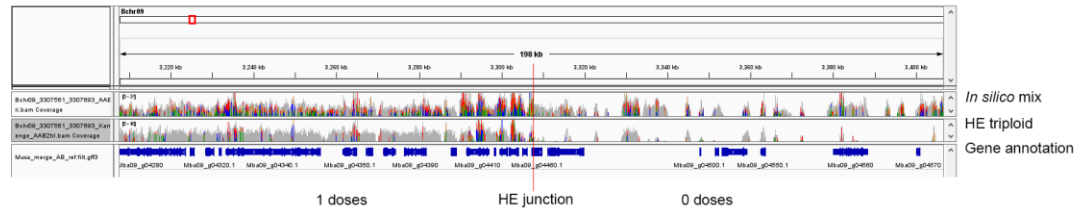

B genome

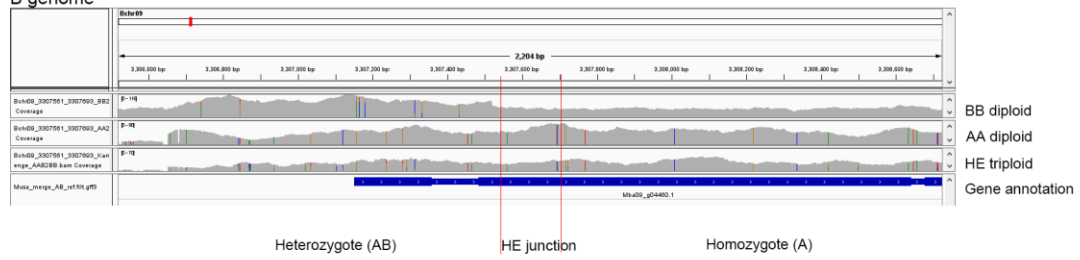

HE junction 12.

A genome

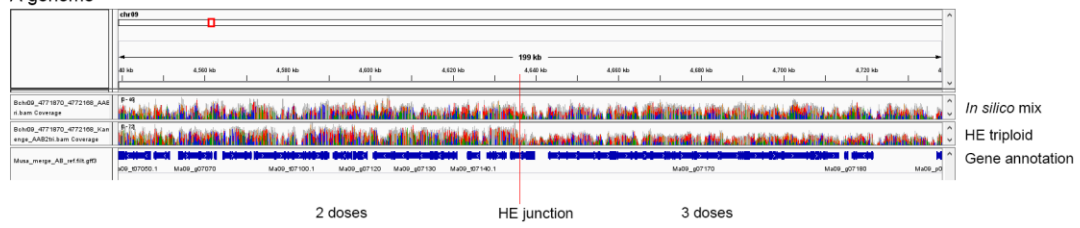

B genome

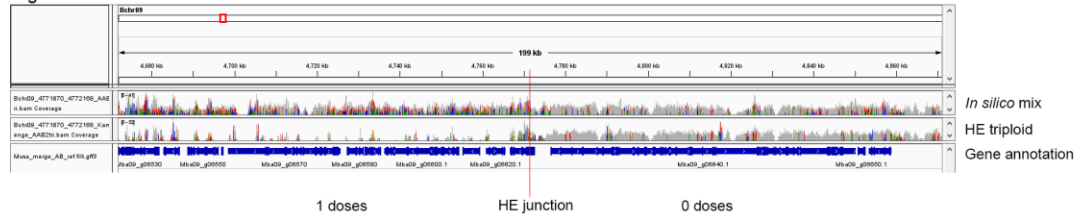

B genome

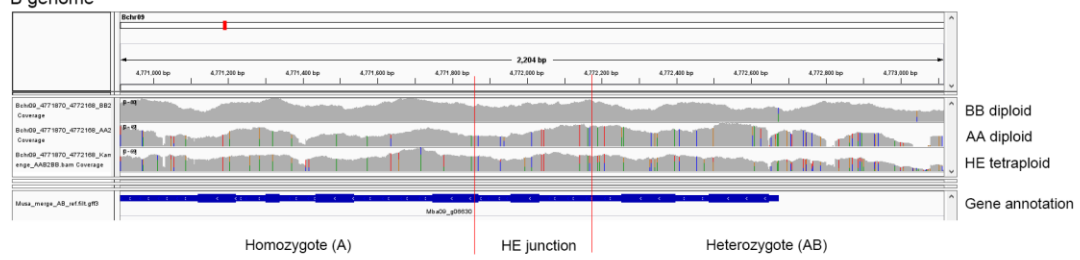

HE junction 13.

A genome

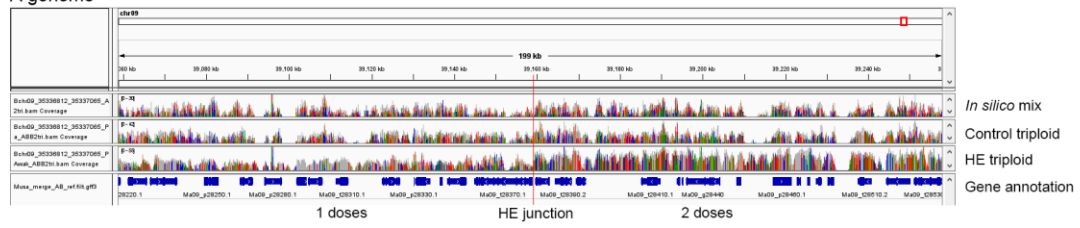

B genome

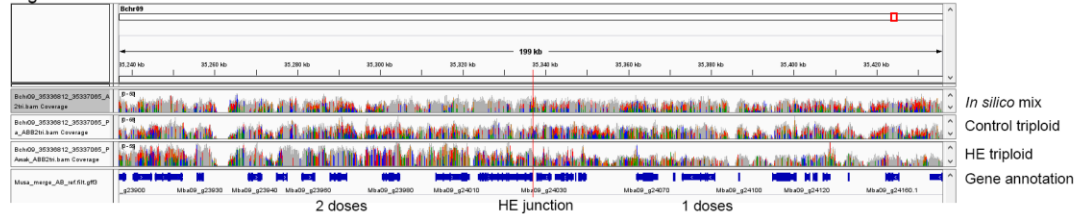

B genome

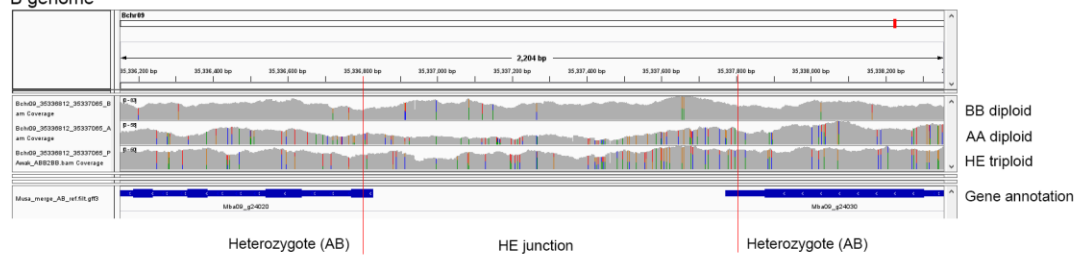

HE junction 14.

A genome

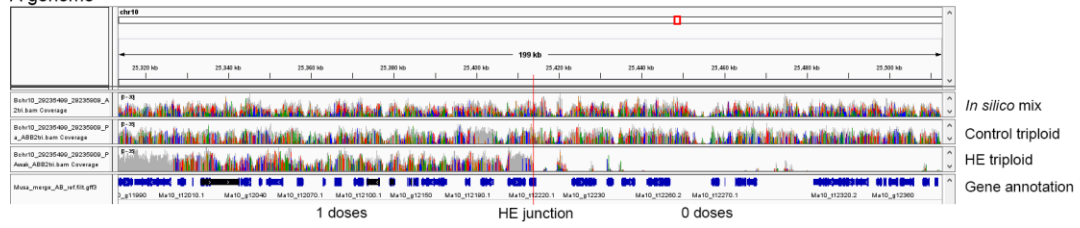

B genome

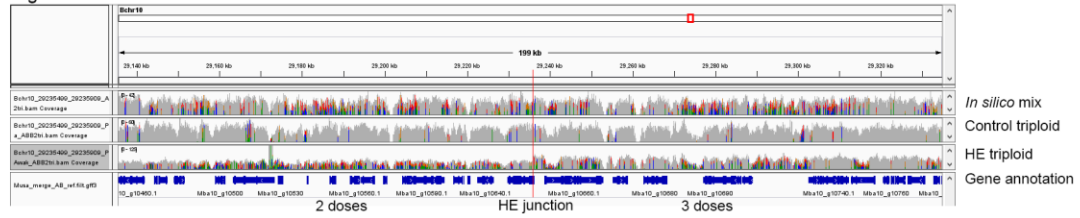

B genome

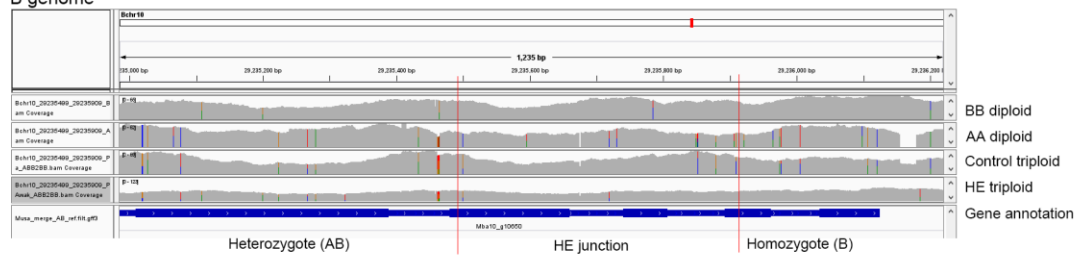

HE junction 15.

A genome

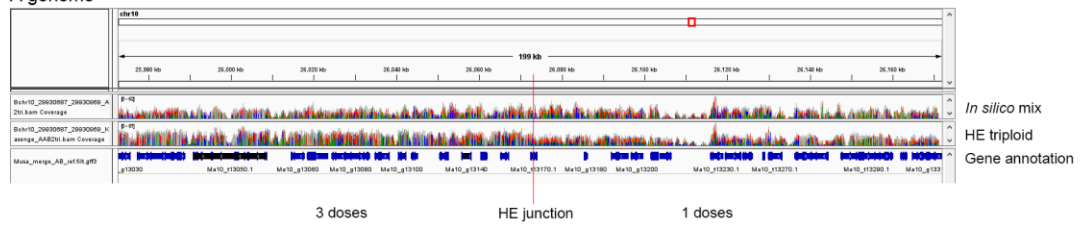

B genome

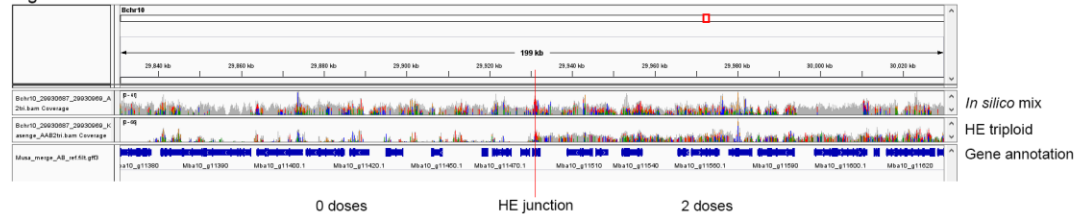

B genome

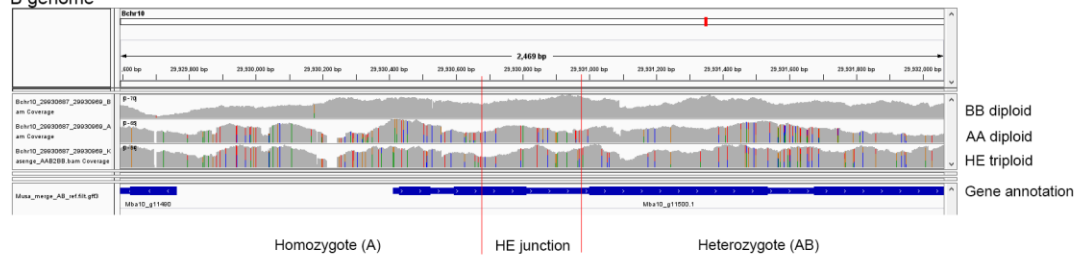

HE junction 16.

A genome

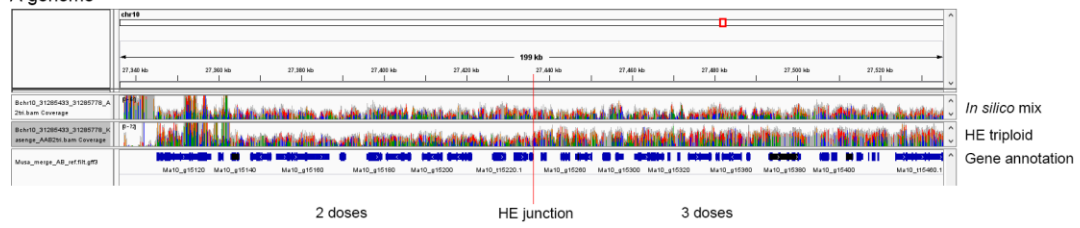

B genome

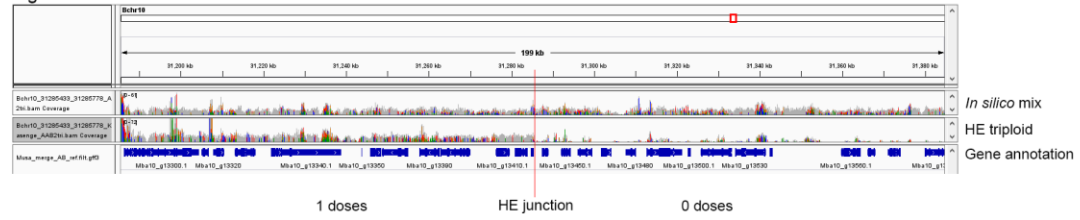

B genome

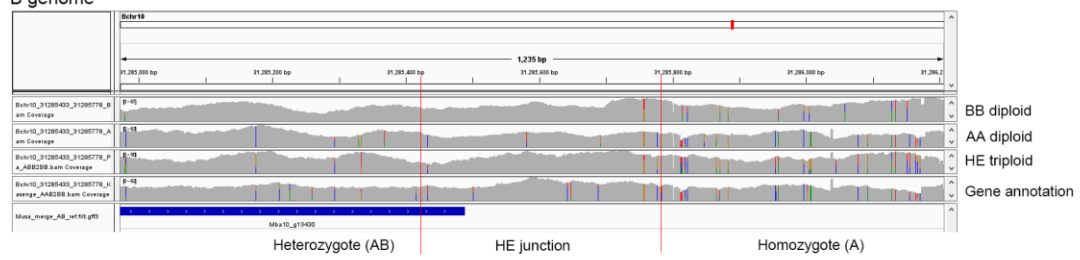

HE junction 17.

A genome

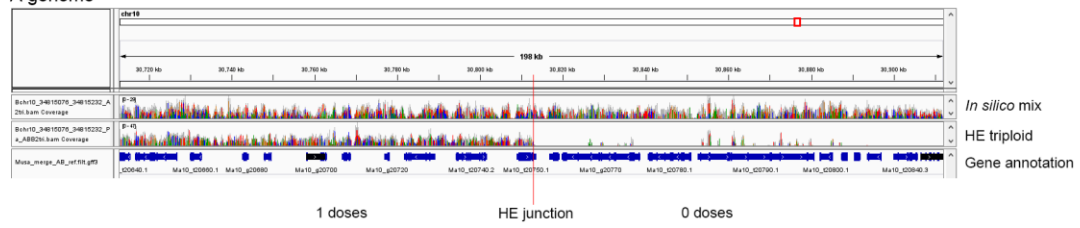

B genome

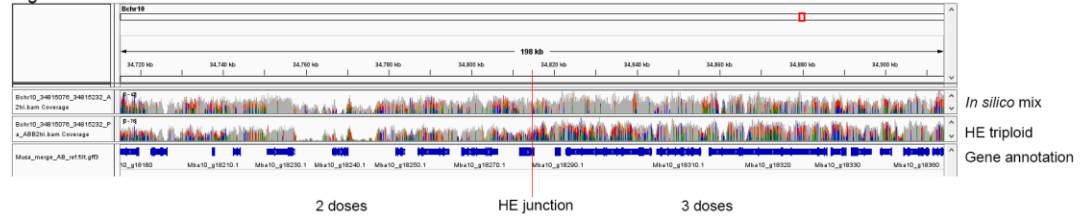

B genome

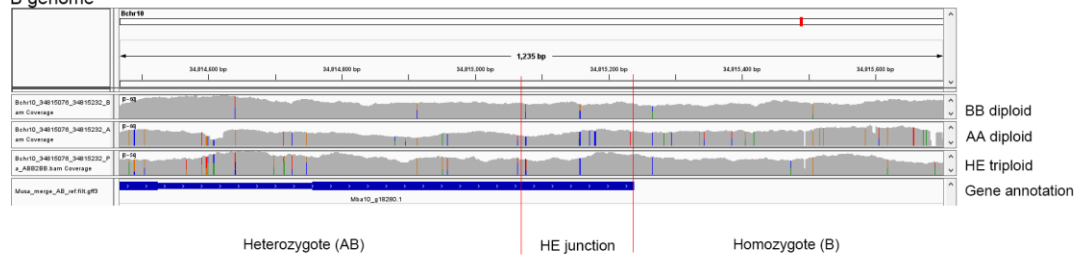

HE junction 18.



A genome

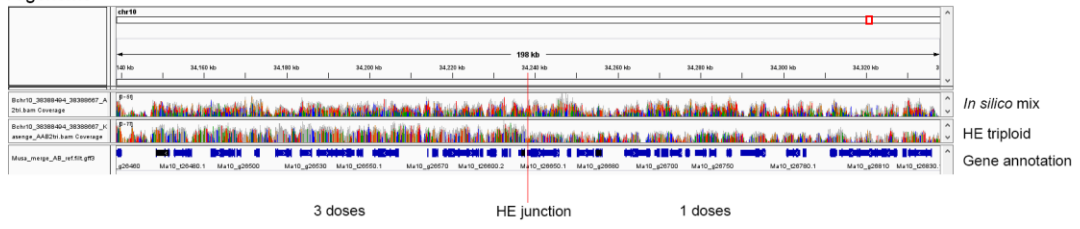

B genome

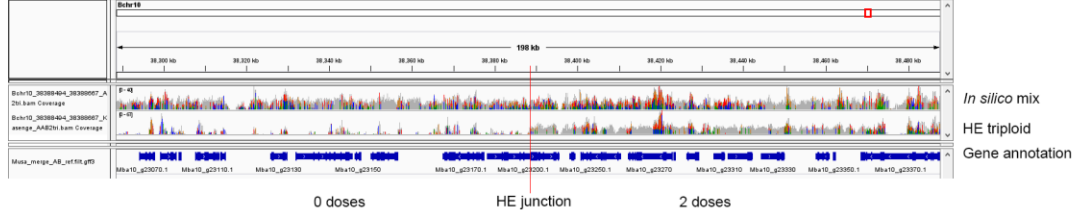

B genome

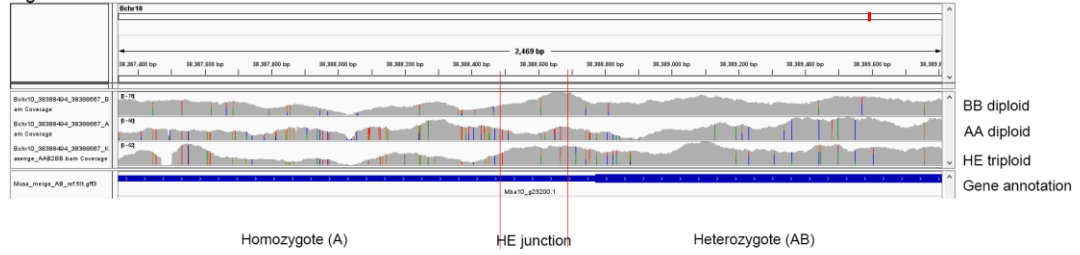

HE junction 19.

A genome

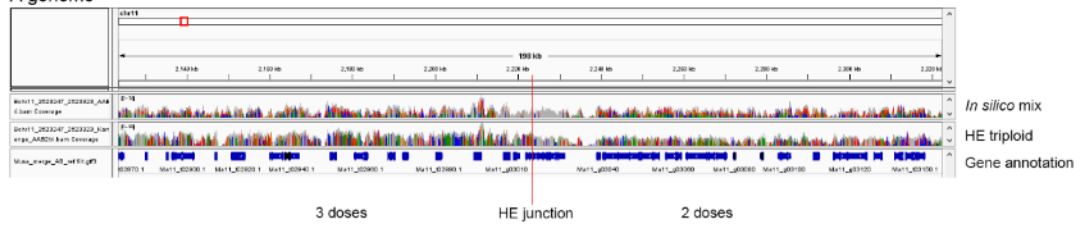

B genome

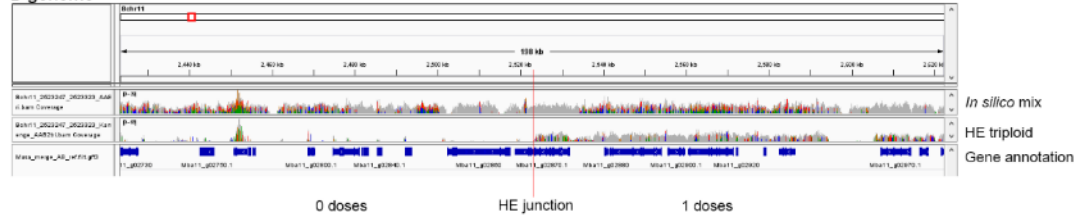

B genome

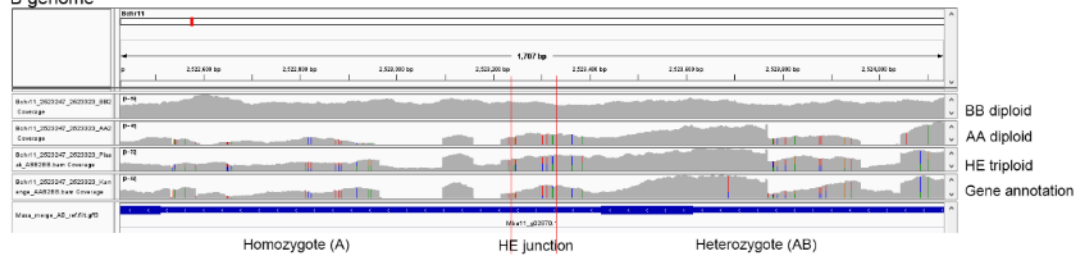

HE junction 20.

A genome

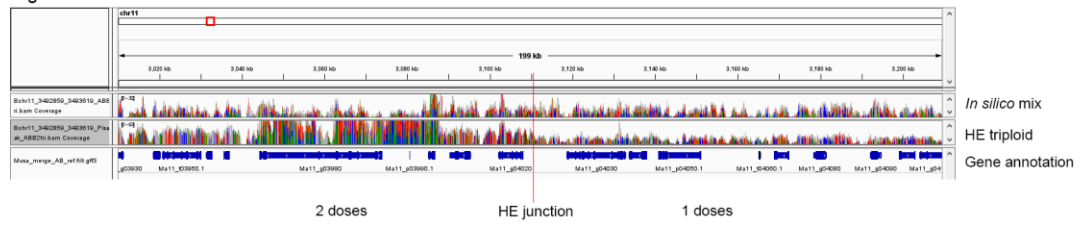

B genome

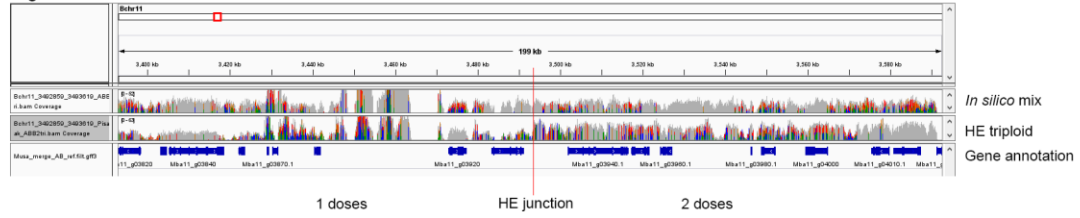

B genome

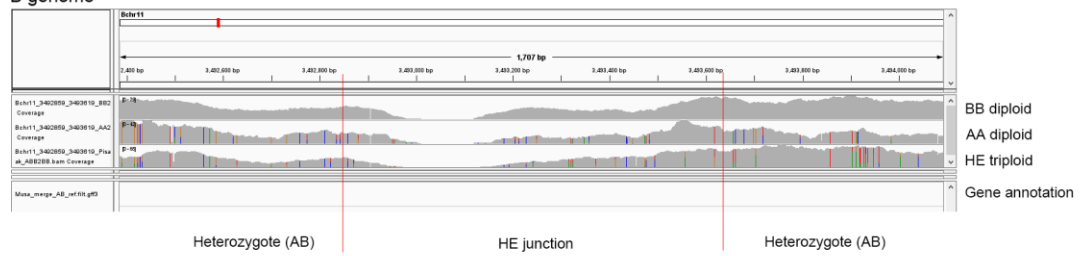

HE junction 21.

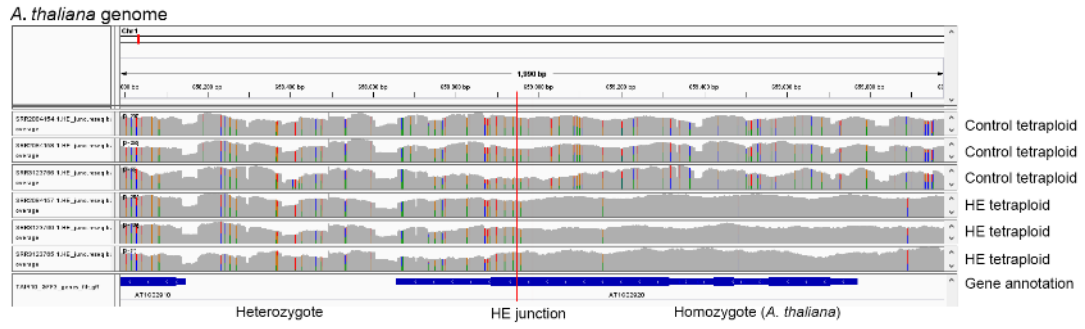

Fig. S17. IGV panel of HE junction regions in *Arabidopsis suecica* (9 HE junctions). The panel shows the genotypes (homozygote or heterozygote) around HE junction (region between red lines) based on SNP genotyping.

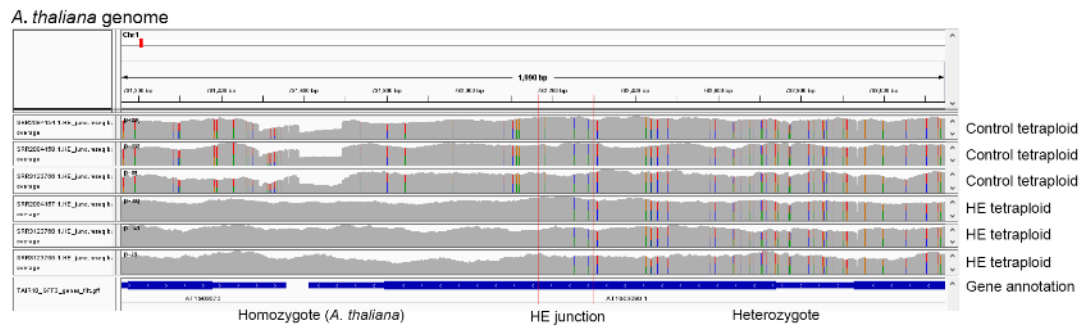

HE junction 2.

*A. thaliana* genome

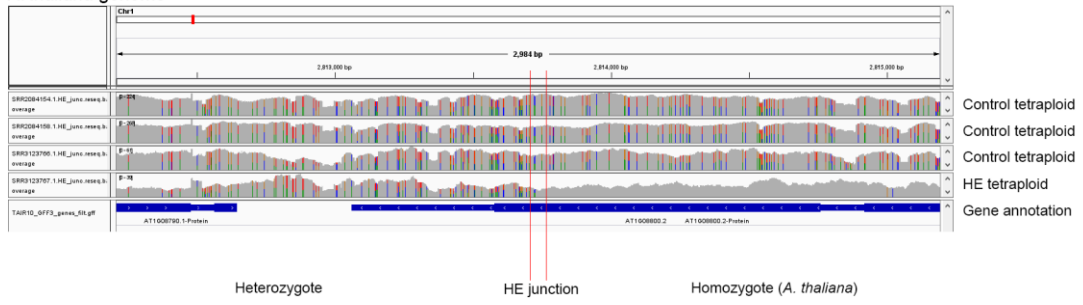

HE junction 3.

*A. thaliana* genome

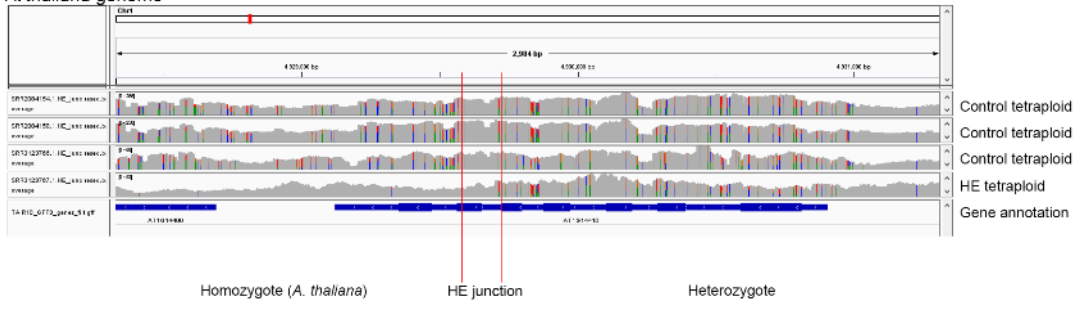

HE junction 4.

*A. thaliana* genome

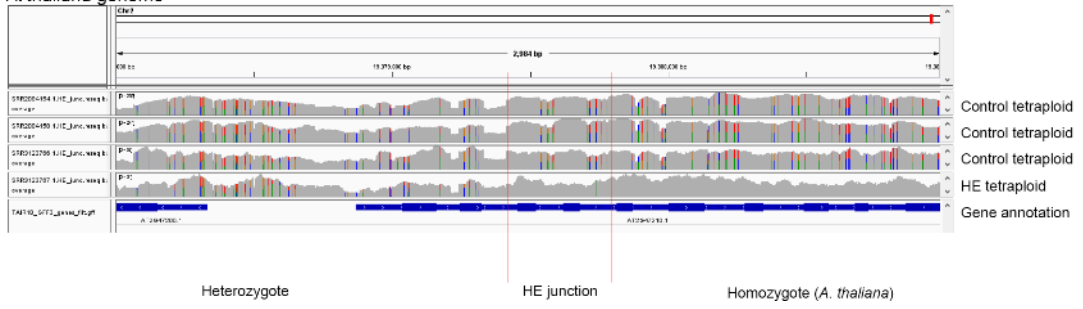

HE junction 5.



*A. thaliana* genome

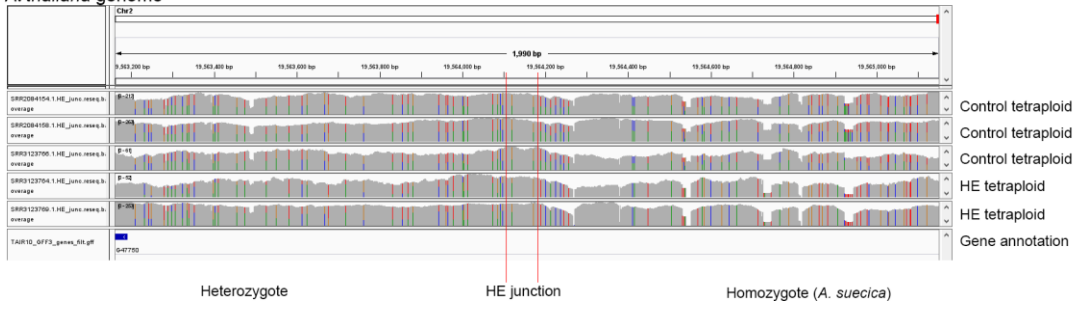

HE junction 6.

*A. thaliana* genome

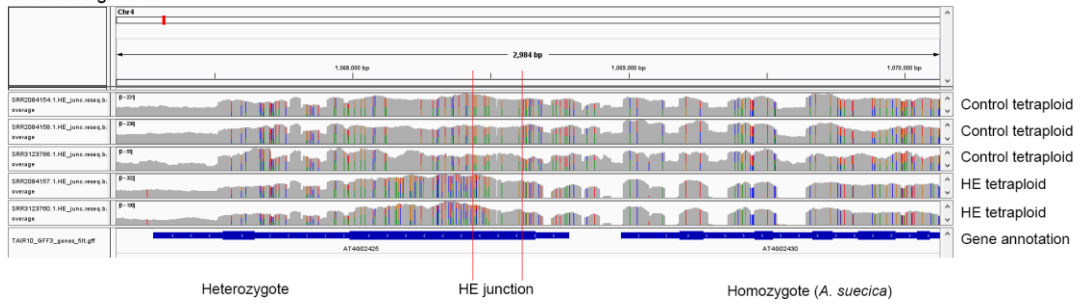

HE junction 7.

*A. thaliana* genome

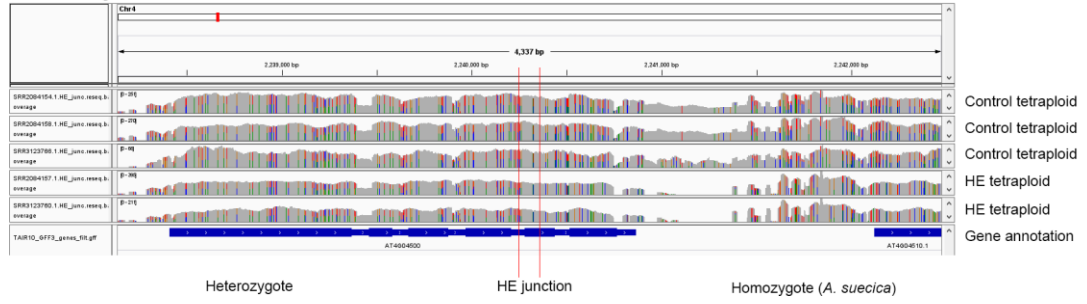

HE junction 8.

*A. thaliana* genome

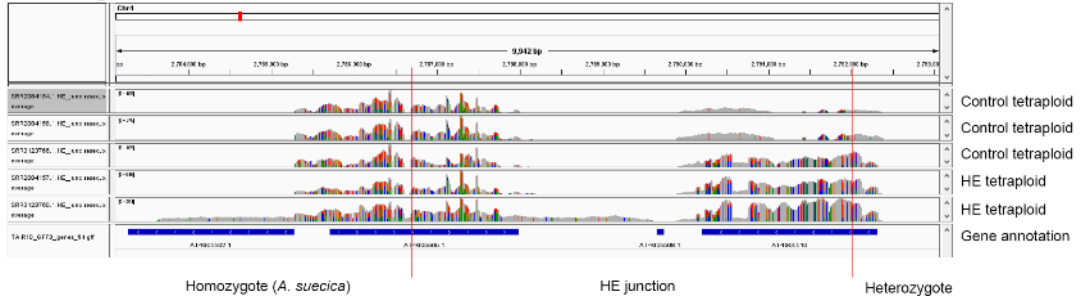

HE junction 9.

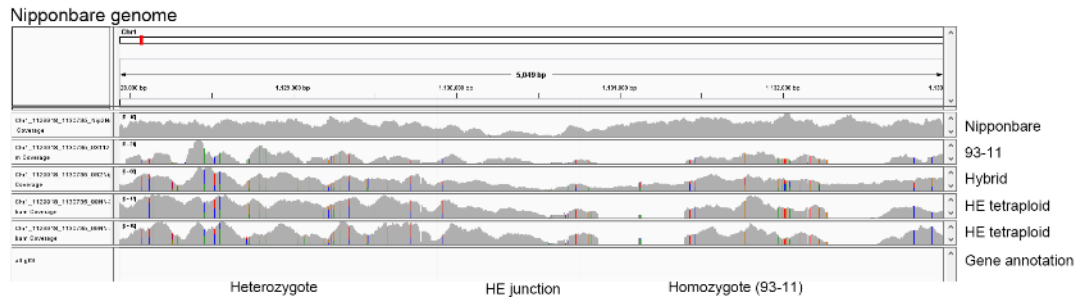

Fig. S18. IGV panel of HE junction regions in synthetic tetraploid rice (166 HE junctions). The panel shows the genotypes (homozygote or heterozygote) around HE junction (region between red lines) based on SNP genotyping between (Nipponbare and 93-11).

Nipponbare genome

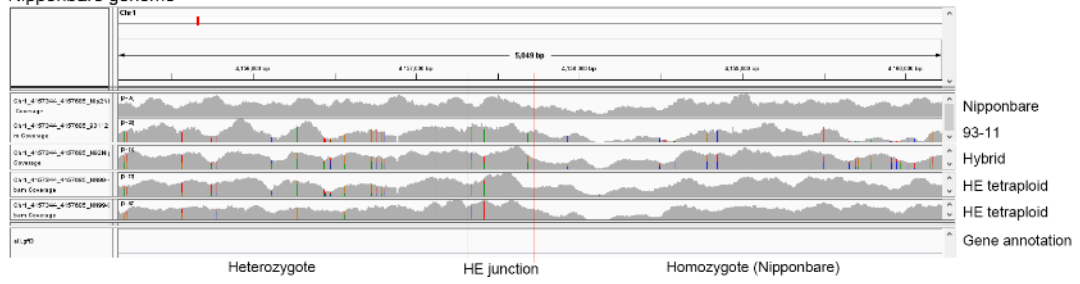

HE junction 2.

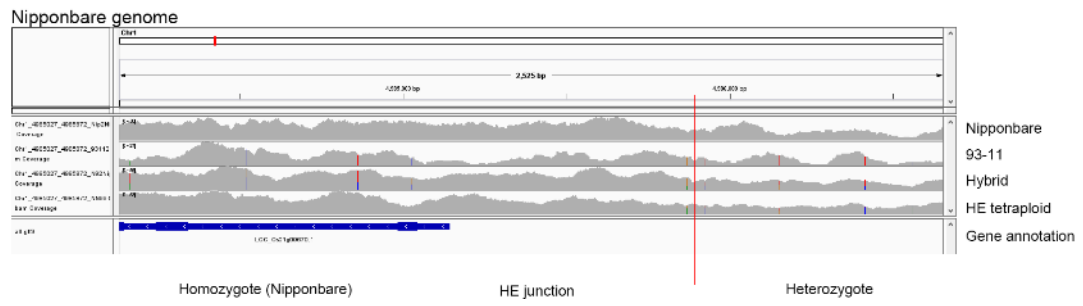

HE junction 3.

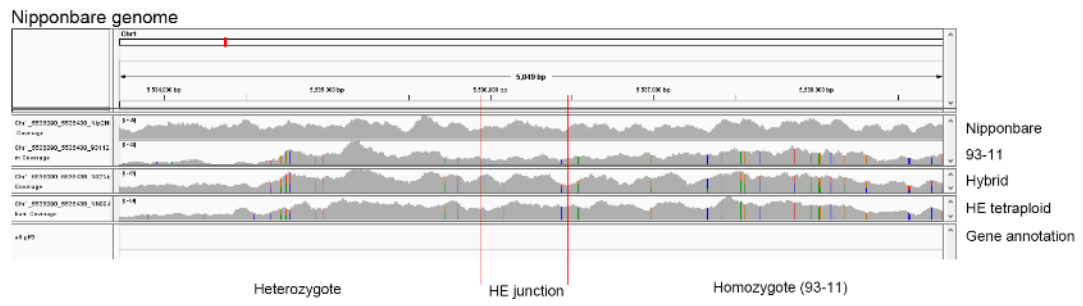

HE junction 4.



Nipponbare genome

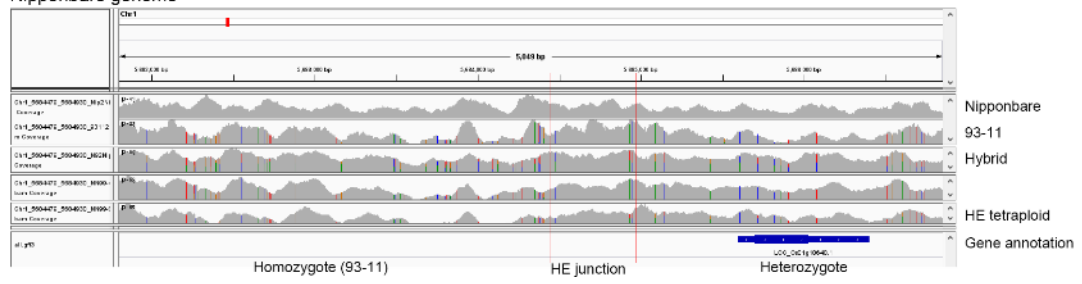

HE junction 5.

Nipponbare genome

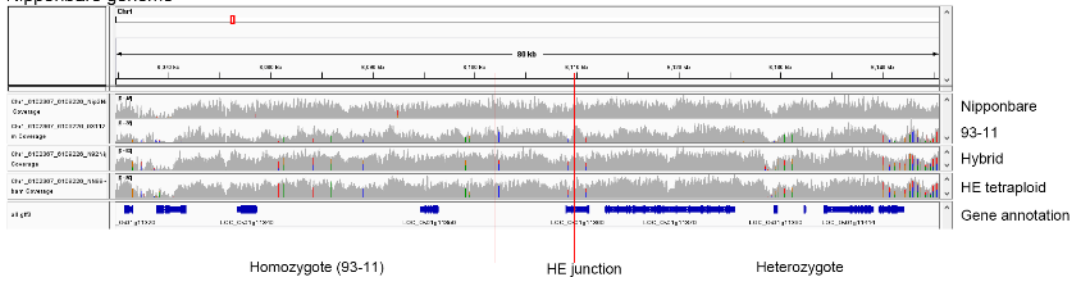

HE junction 6.

Nipponbare genome

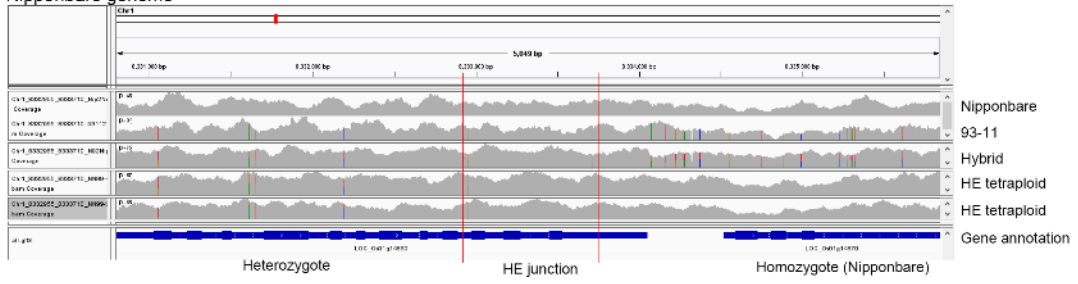

HE junction 7.

Nipponbare genome

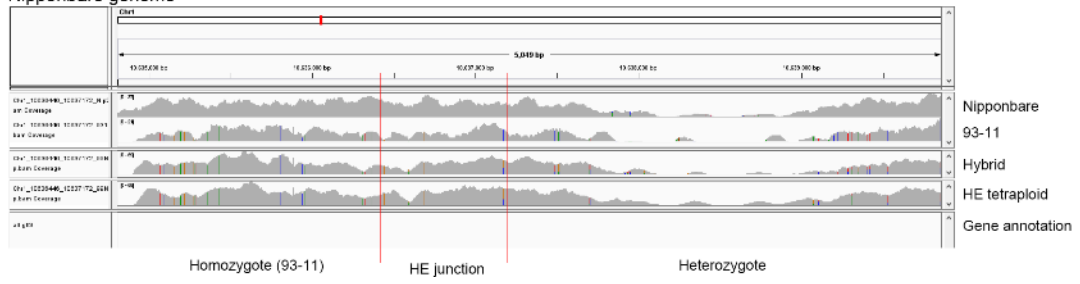

HE junction 8.

Nipponbare genome

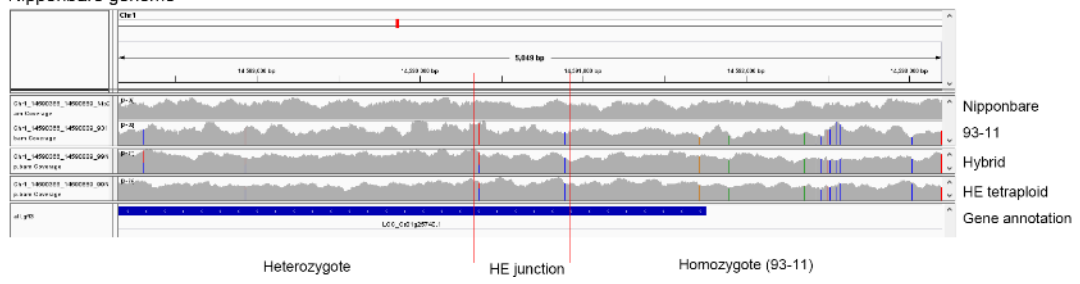

HE junction 9.

Nipponbare genome

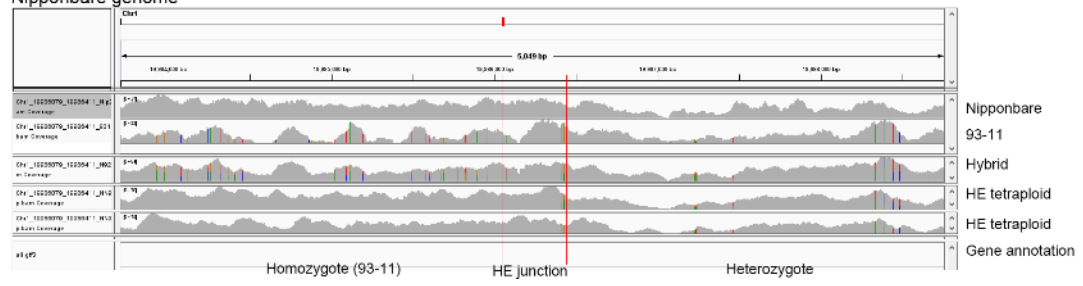

HE junction 10.

Nipponbare genome

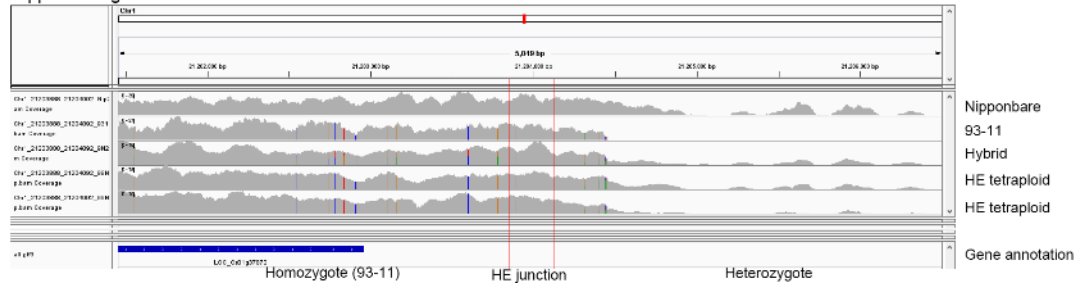

HE junction 11.

Nipponbare genome

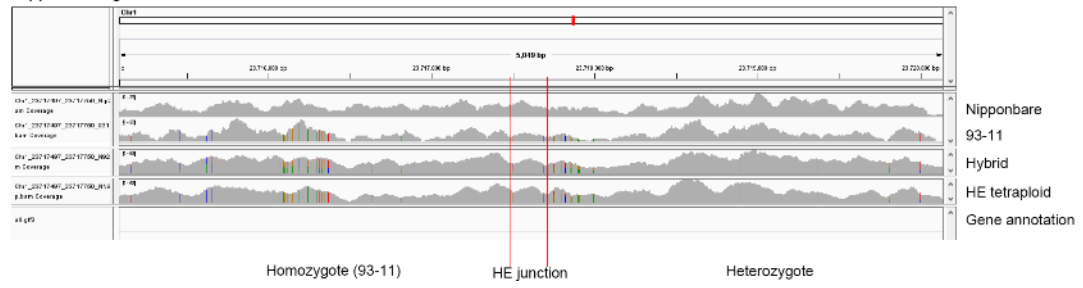

HE junction 12.



Nipponbare genome

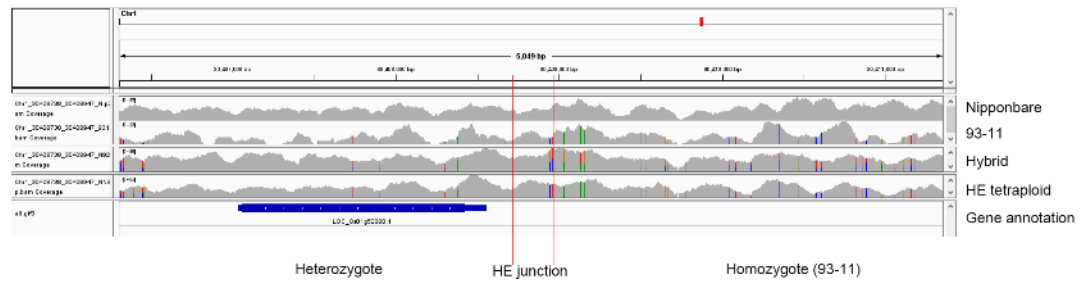

HE junction 13.

Nipponbare genome

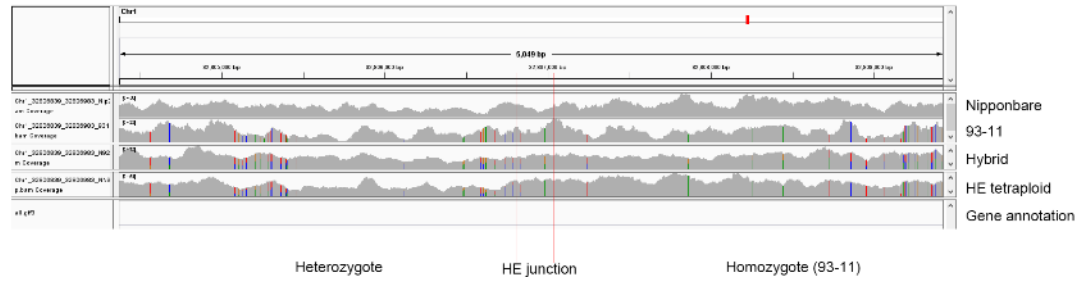

HE junction 14.

Nipponbare genome

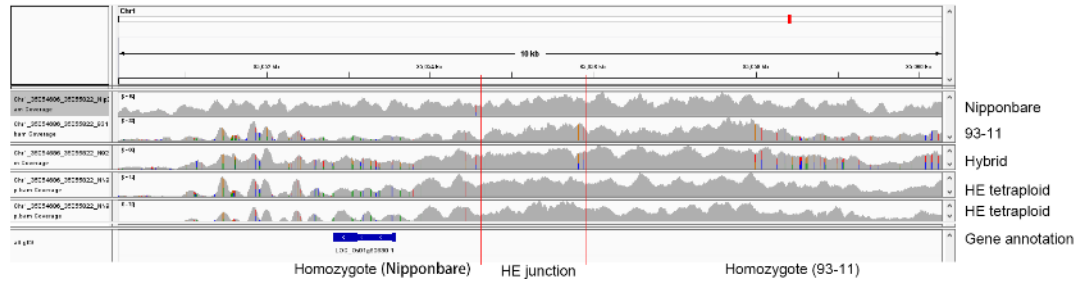

HE junction 15.

Nipponbare genome

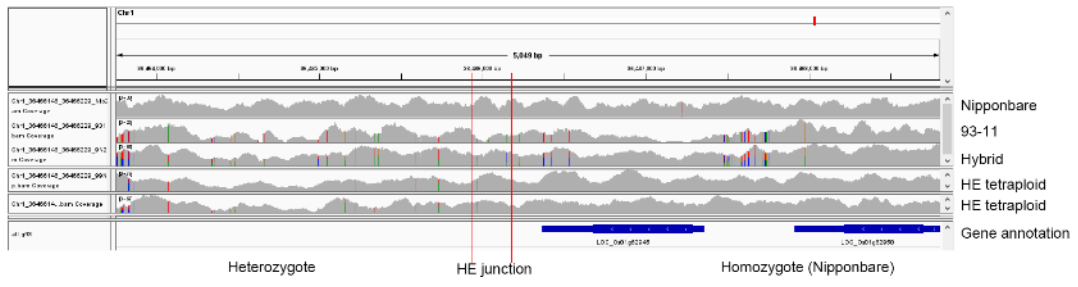

HE junction 16.

Nipponbare genome

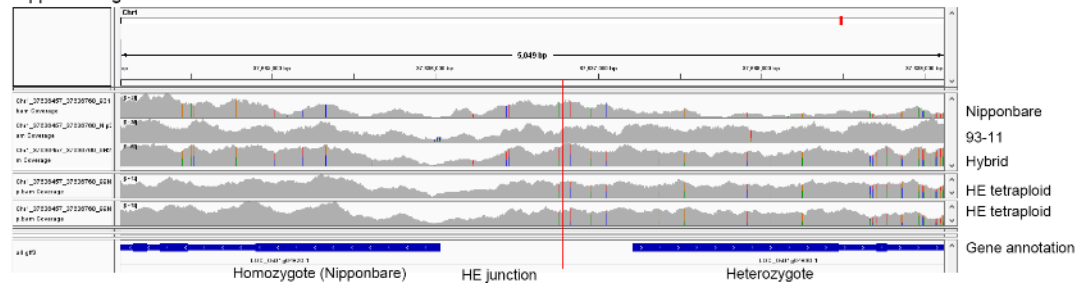

HE junction 17.

Nipponbare genome

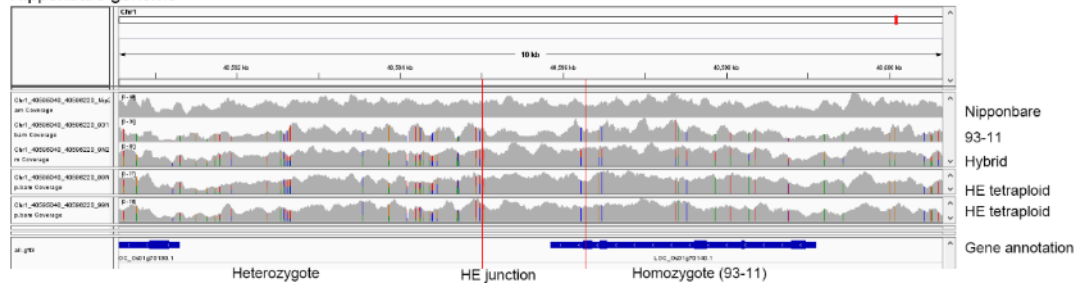

HE junction 18.

Nipponbare genome

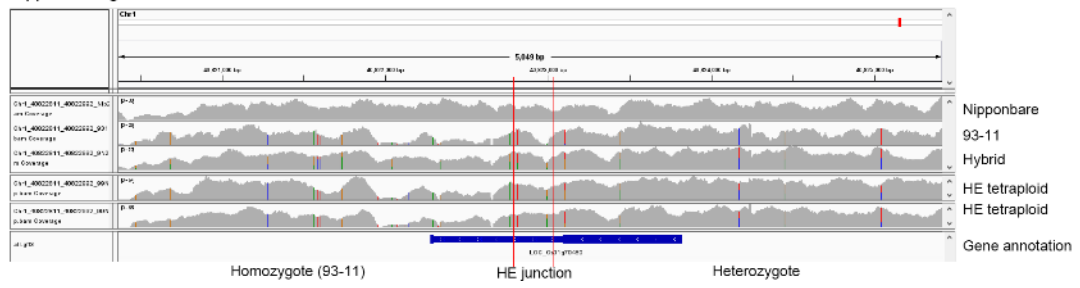

HE junction 19.

Nipponbare genome

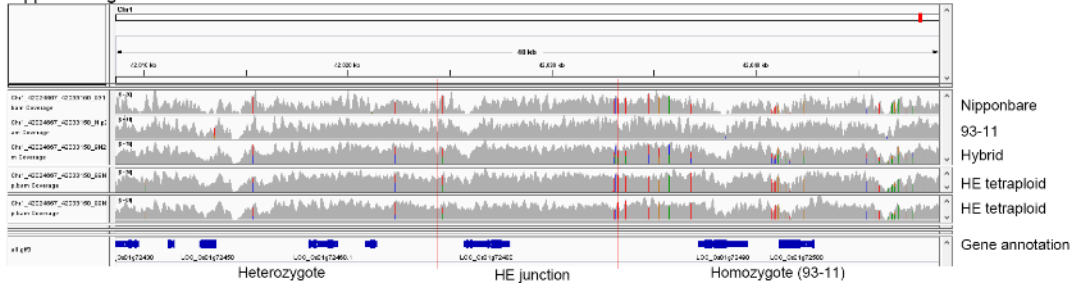

HE junction 20.



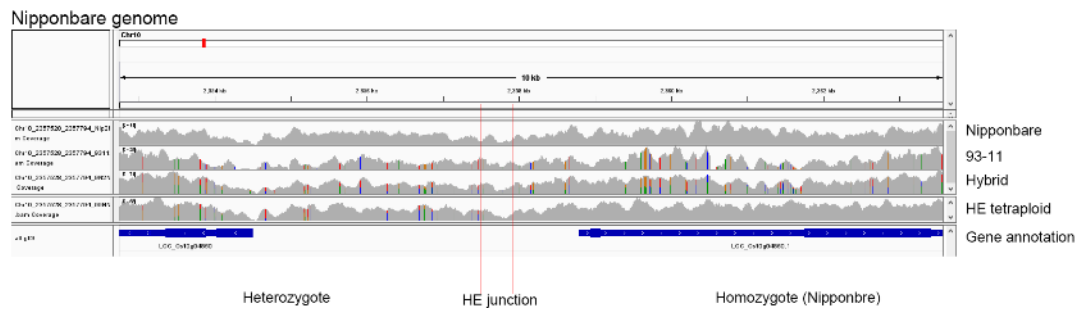

HE junction 21.

Nipponbare genome

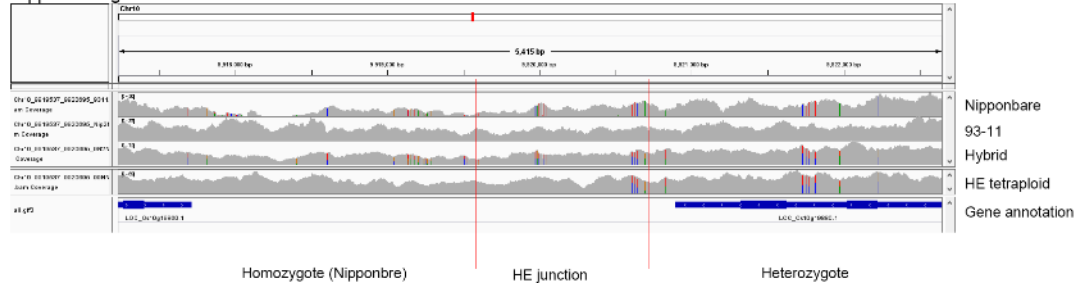

HE junction 22.

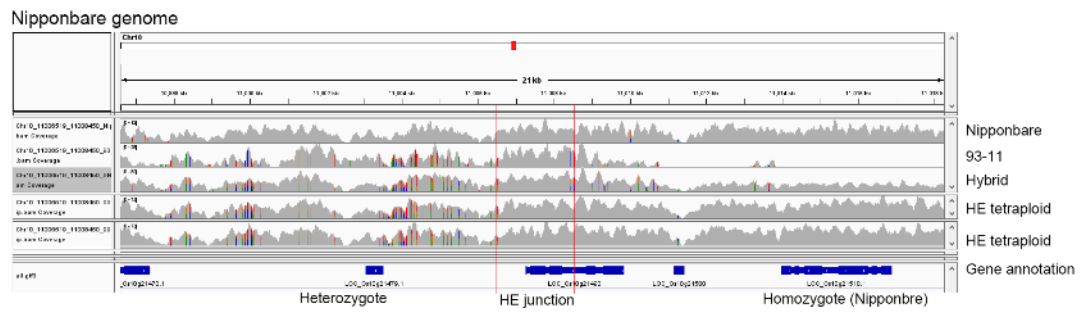

HE junction 23.

Nipponbare genome

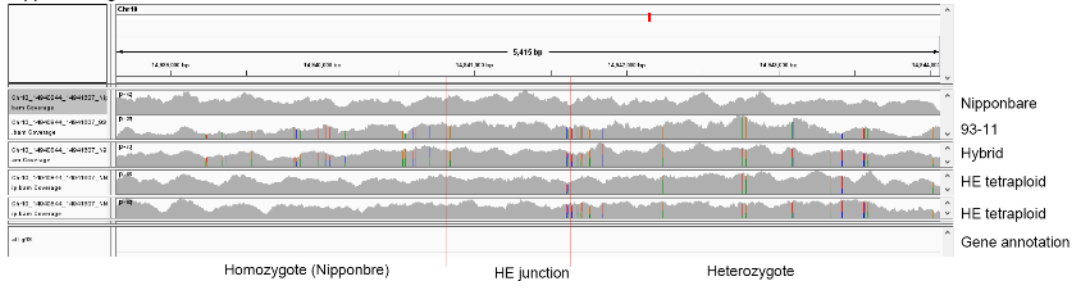

HE junction 24.

Nipponbare genome

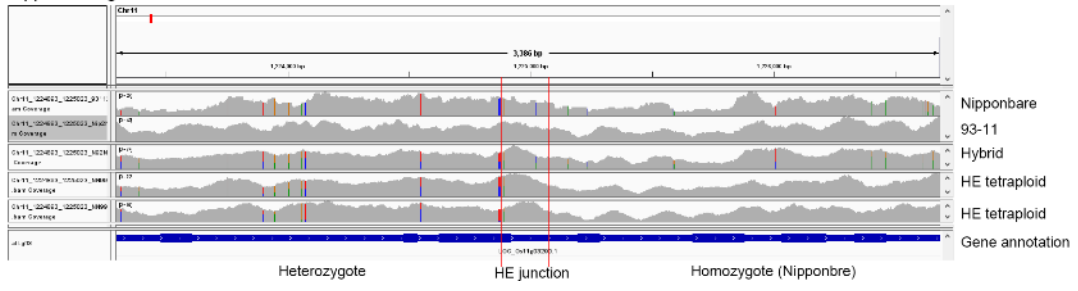

HE junction 25.

Nipponbare genome

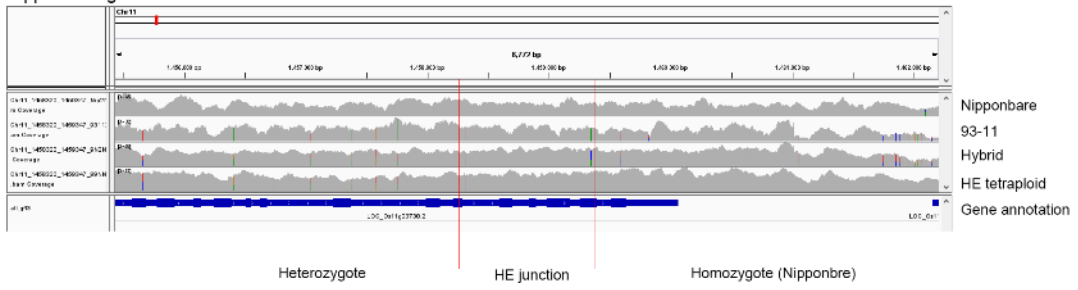

HE junction 26.

Nipponbare genome

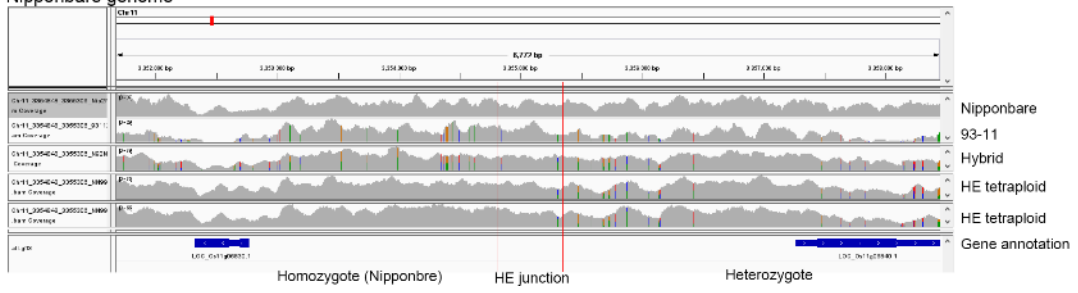

HE junction 27.

Nipponbare genome

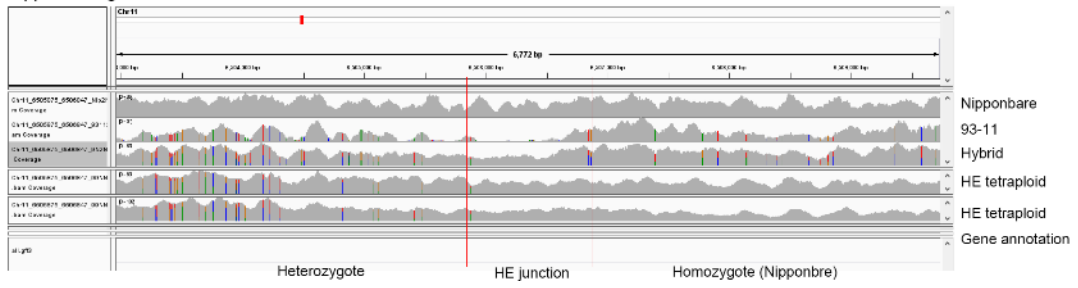

HE junction 28.



Nipponbare genome

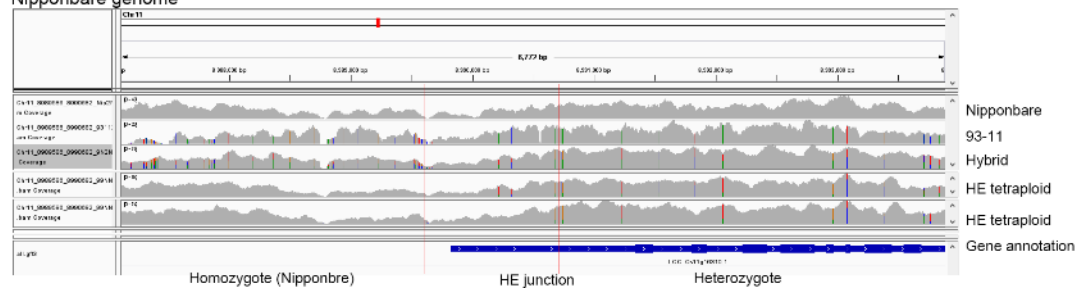

HE junction 29.

Nipponbare genome

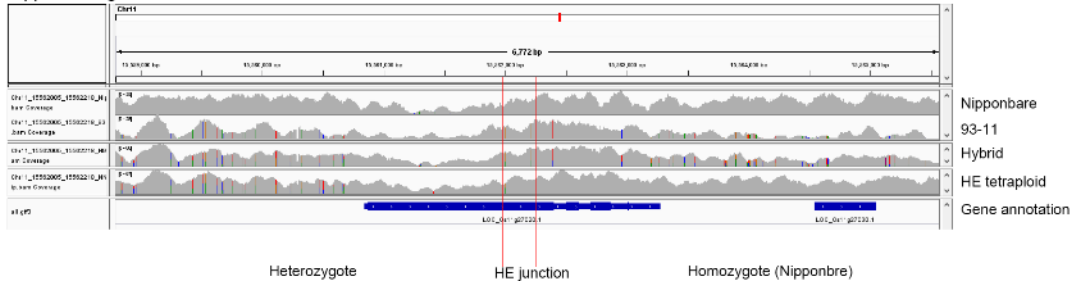

HE junction 30.

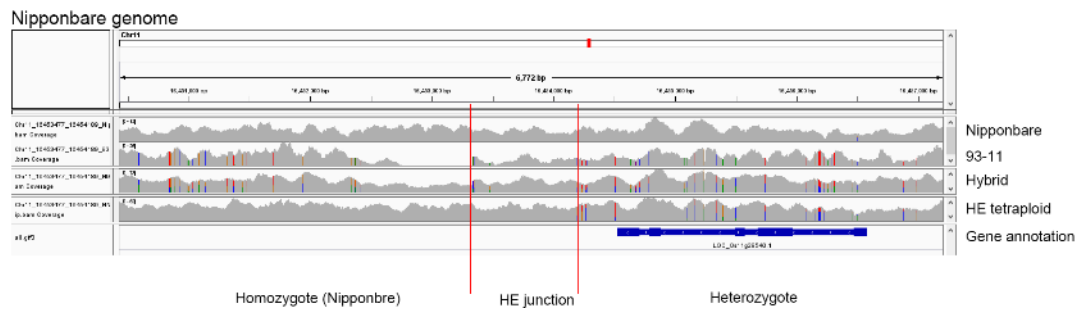

HE junction 31.

Nipponbare genome

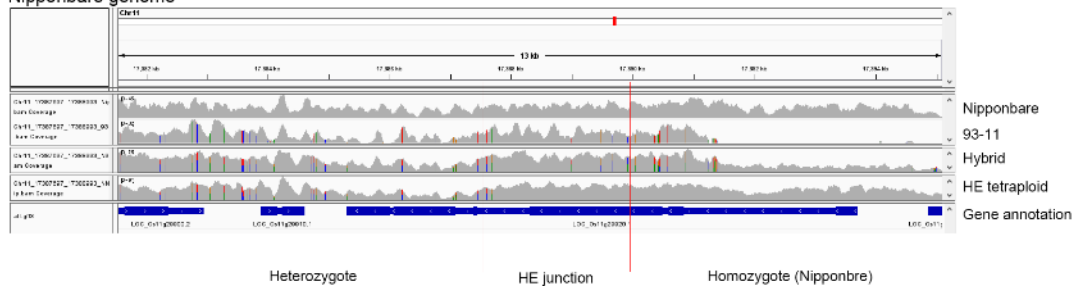

HE junction 32.

Nipponbare genome

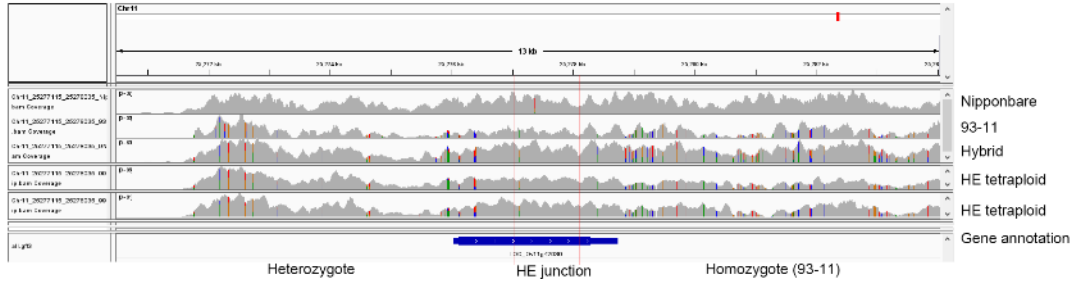

HE junction 33.

Nipponbare genome

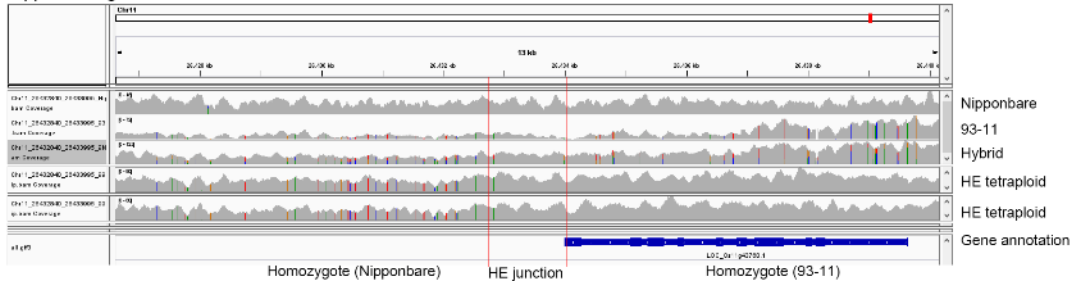

HE junction 34.

Nipponbare genome

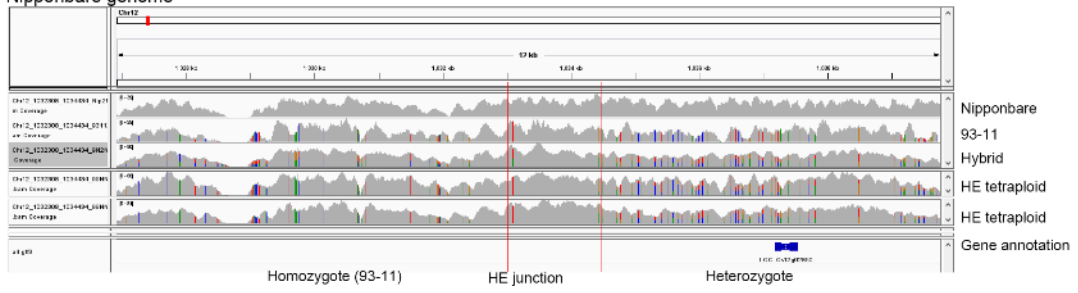

HE junction 35.

Nipponbare genome

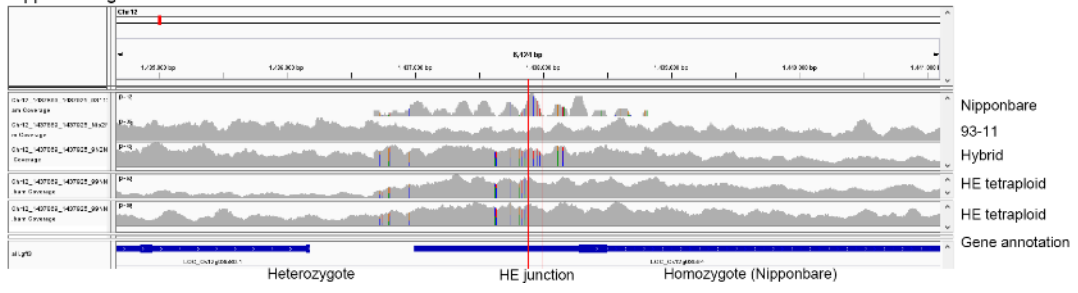

HE junction 36.



Nipponbare genome

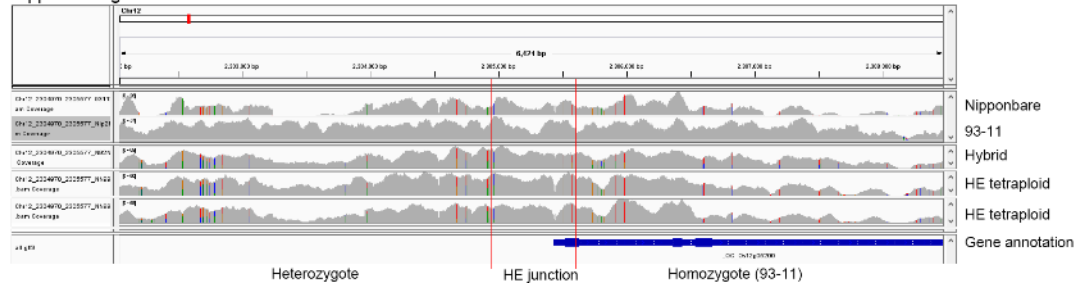

HE junction 37.

Nipponbare genome

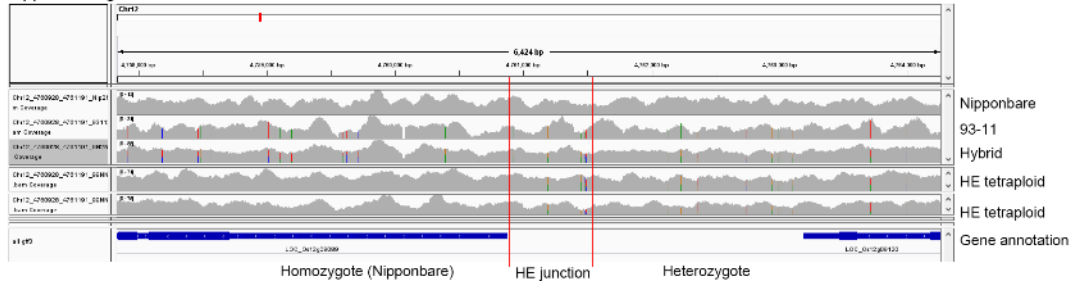

HE junction 38.

Nipponbare genome

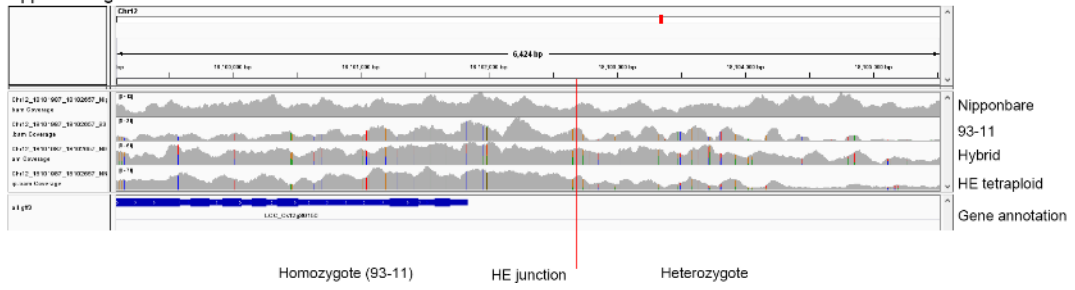

HE junction 39.

Nipponbare genome

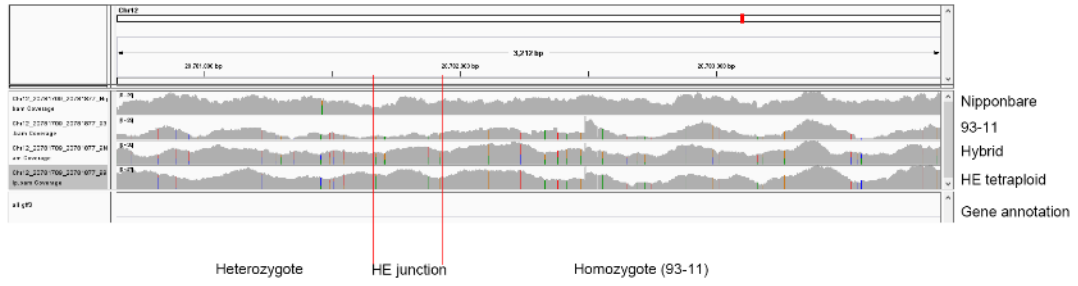

HE junction 40.

Nipponbare genome

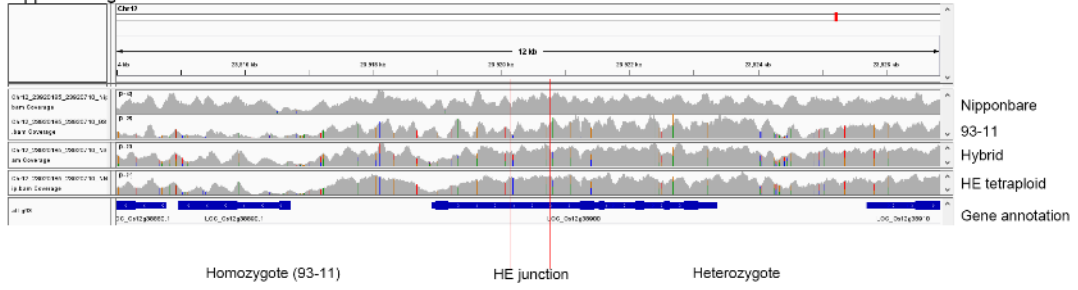

HE junction 41.

Nipponbare genome

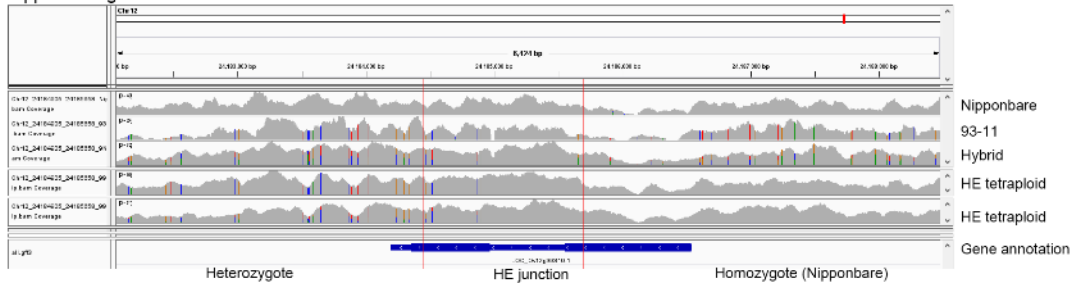

HE junction 42.

Nipponbare genome

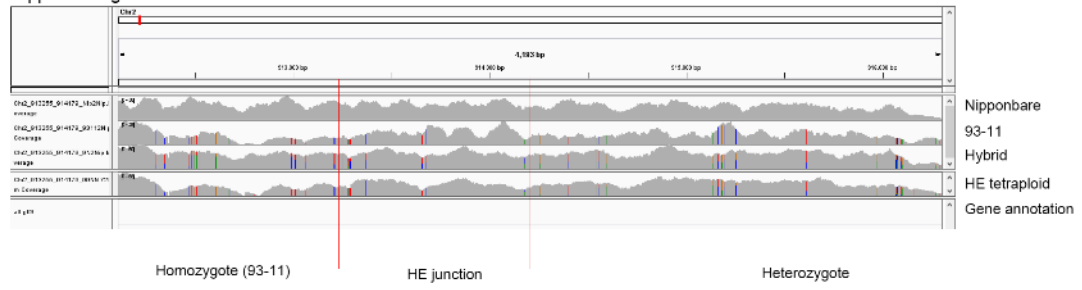

HE junction 43.

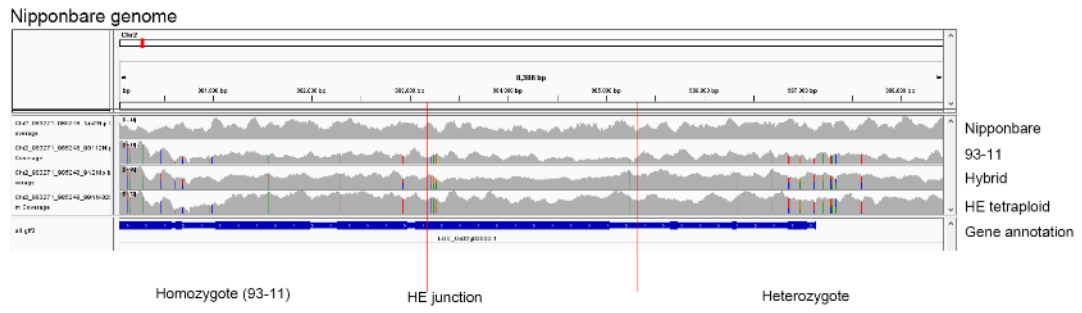

HE junction 44.



Nipponbare genome

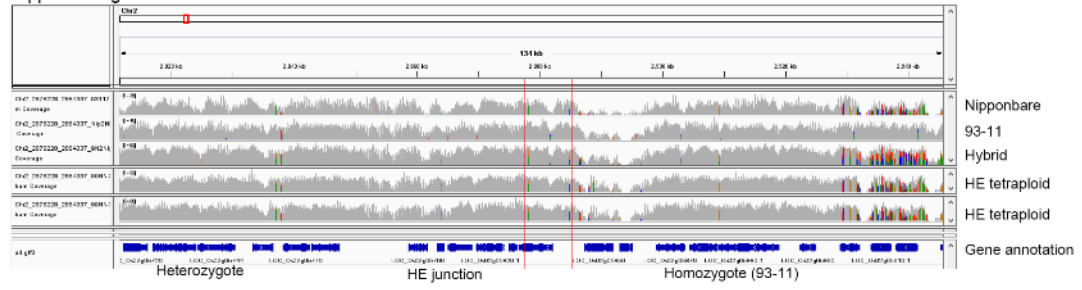

HE junction 45.

Nipponbare genome

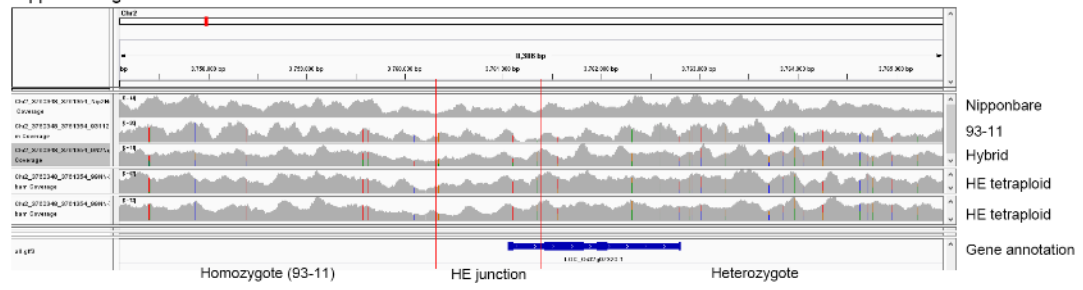

HE junction 46.

Nipponbare genome

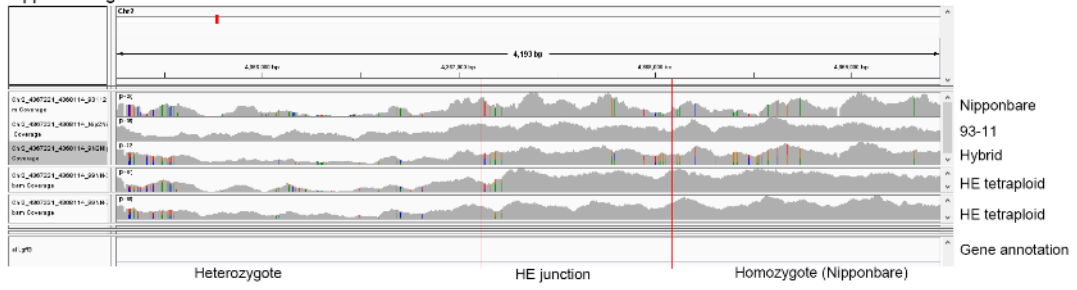

HE junction 47.

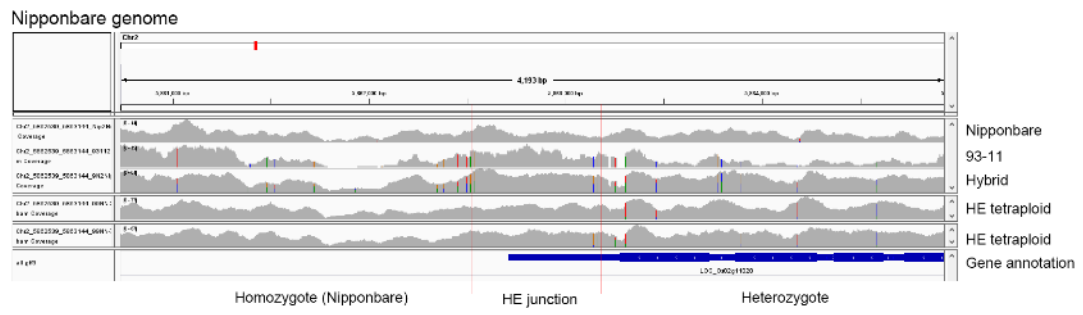

HE junction 48.

Nipponbare genome

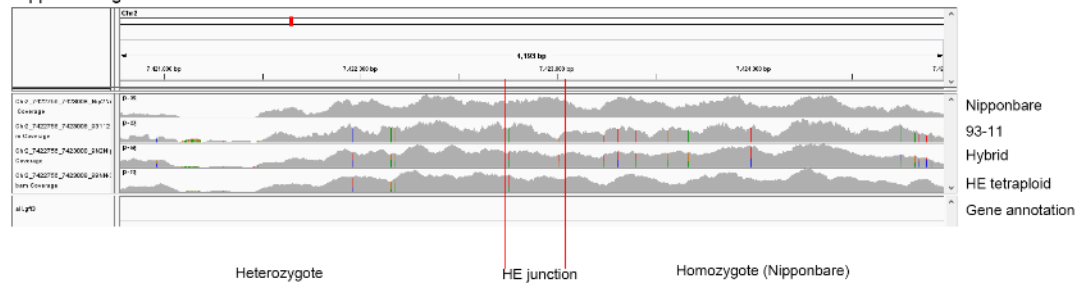

HE junction 49.

Nipponbare genome

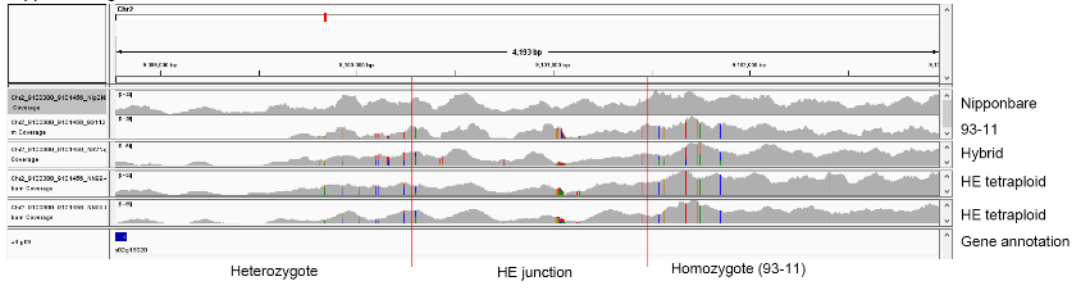

HE junction 50.

Nipponbare genome

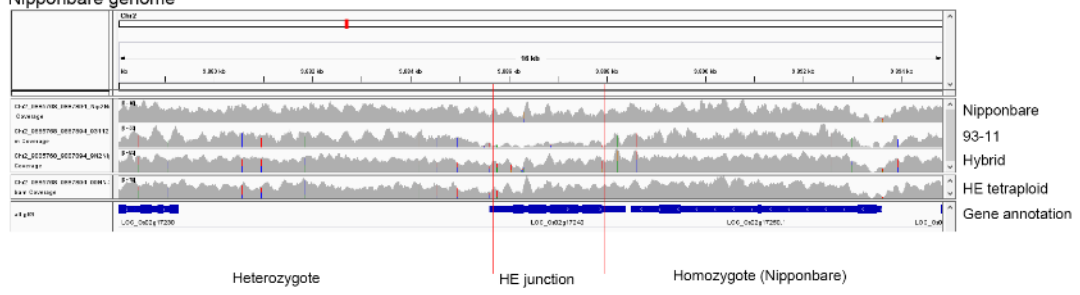

HE junction 51.

Nipponbare genome

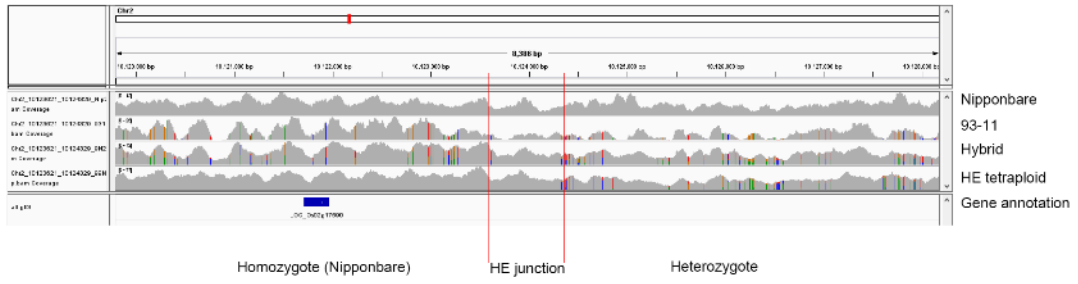

HE junction 52.



Nipponbare genome

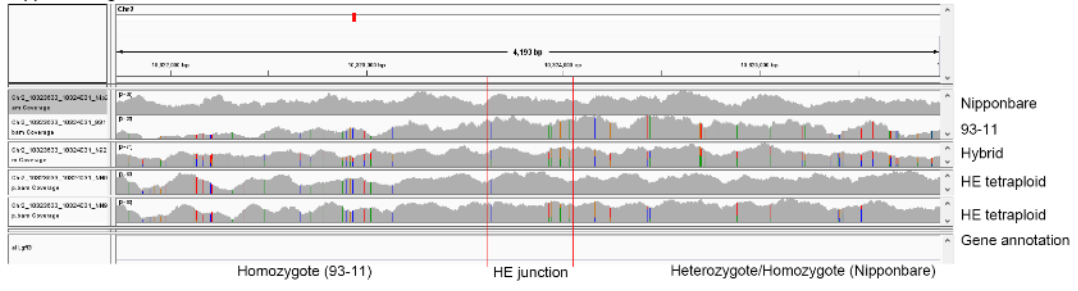

HE junction 53.

Nipponbare genome

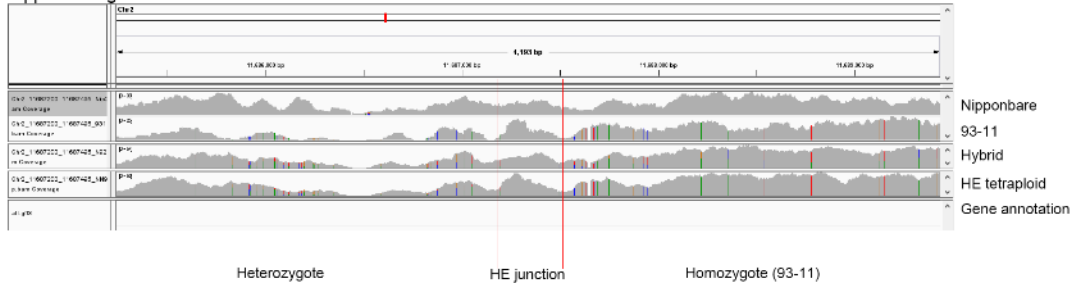

HE junction 54.

Nipponbare genome

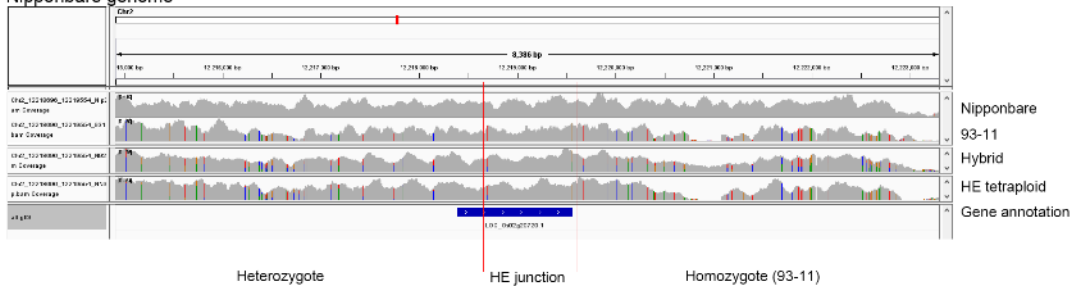

HE junction 55.

Nipponbare genome

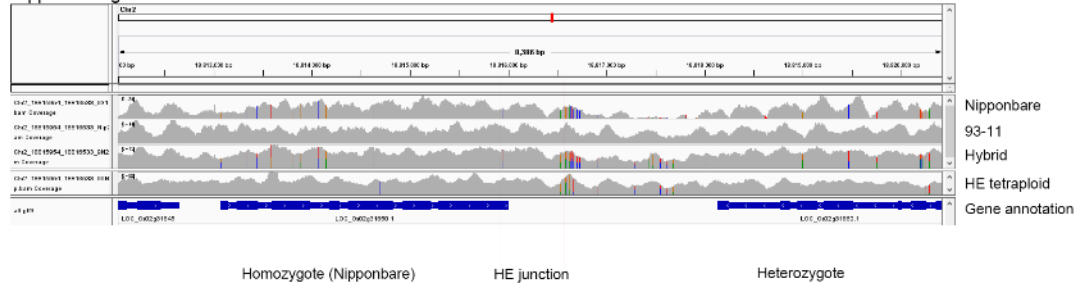

HE junction 56.

Nipponbare genome

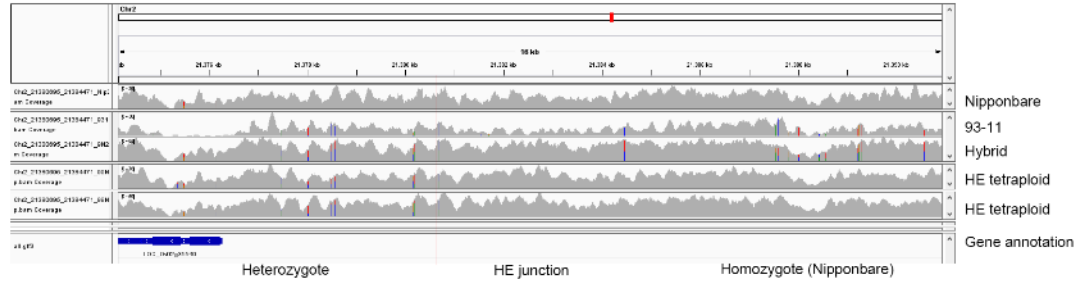

HE junction 57.

Nipponbare genome

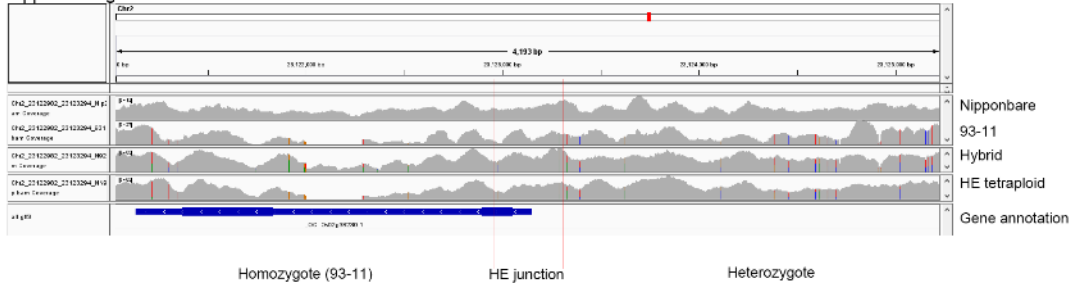

HE junction 58.

Nipponbare genome

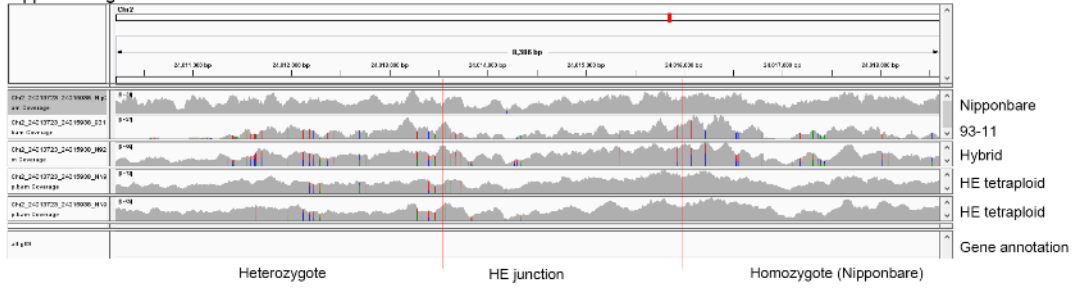

HE junction 59.

Nipponbare genome

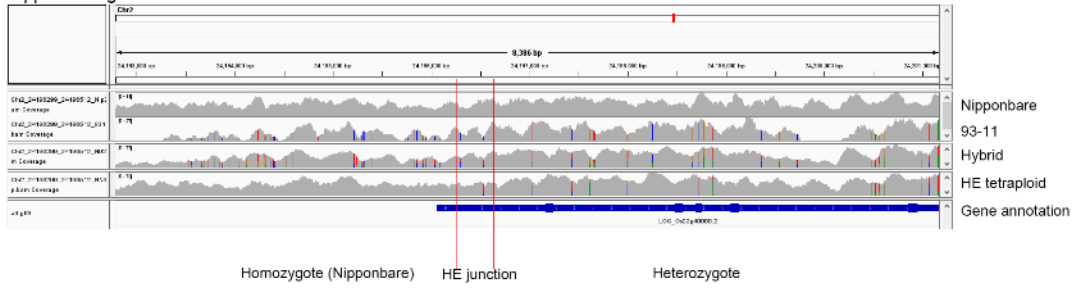

HE junction 60.



Nipponbare genome

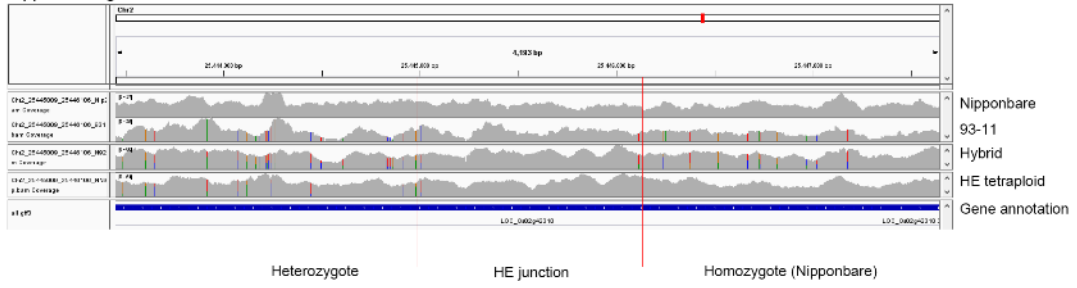

HE junction 61.

Nipponbare genome

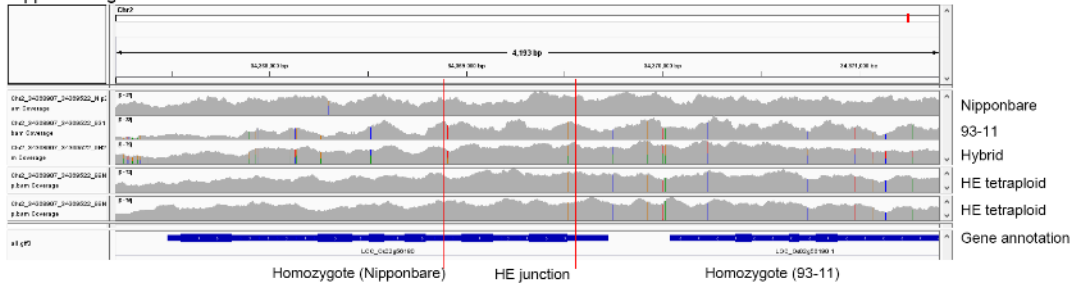

HE junction 62.

Nipponbare genome

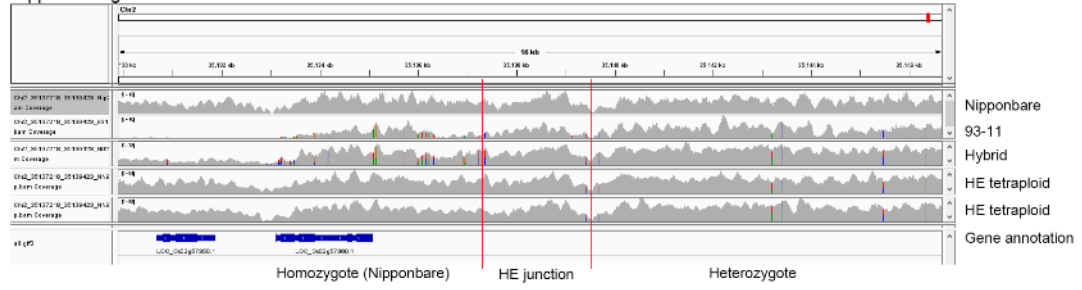

HE junction 63.

Nipponbare genome

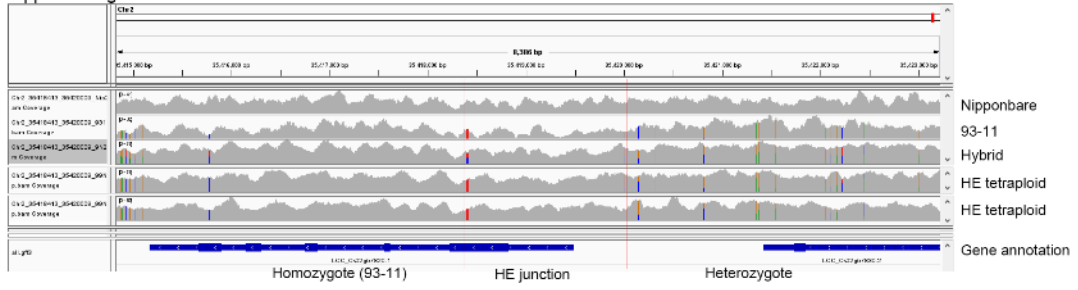

HE junction 64.

Nipponbare genome

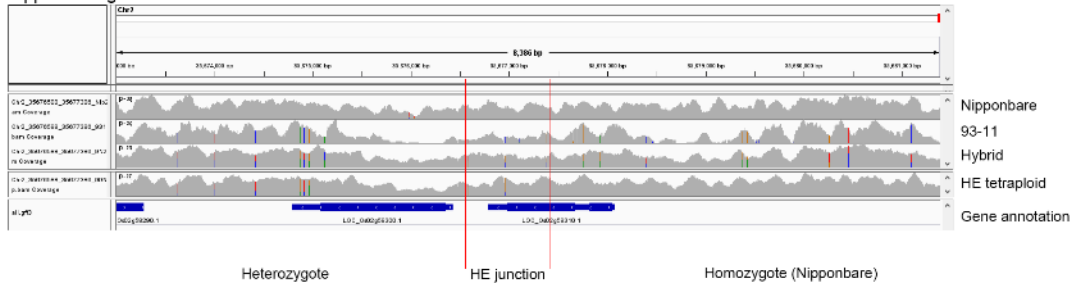

HE junction 65.

Nipponbare genome

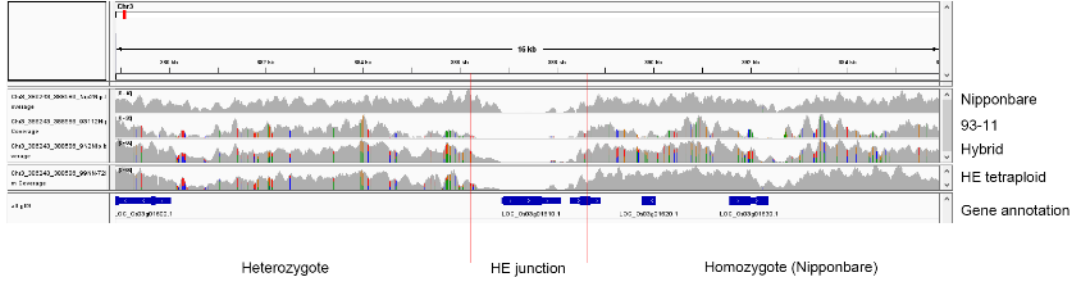

HE junction 66.

Nipponbare genome

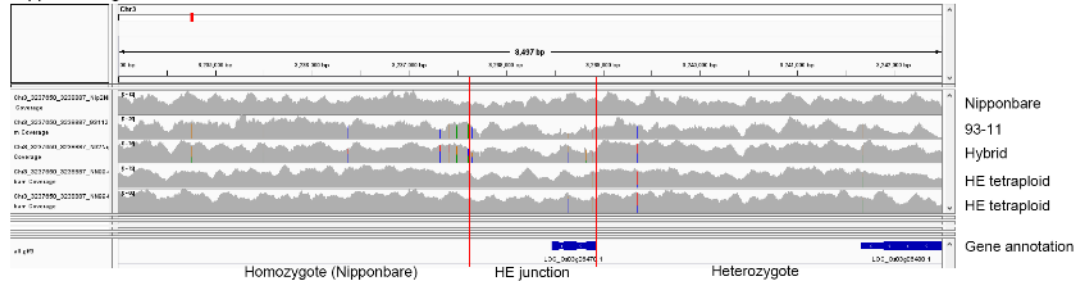

HE junction 67.

Nipponbare genome

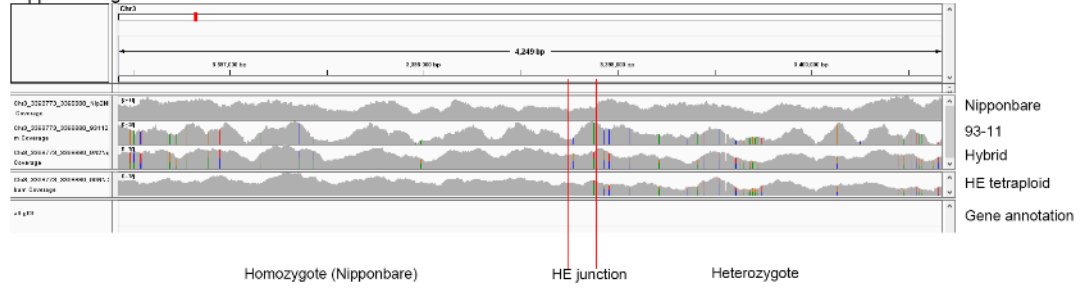

HE junction 68.



Nipponbare genome

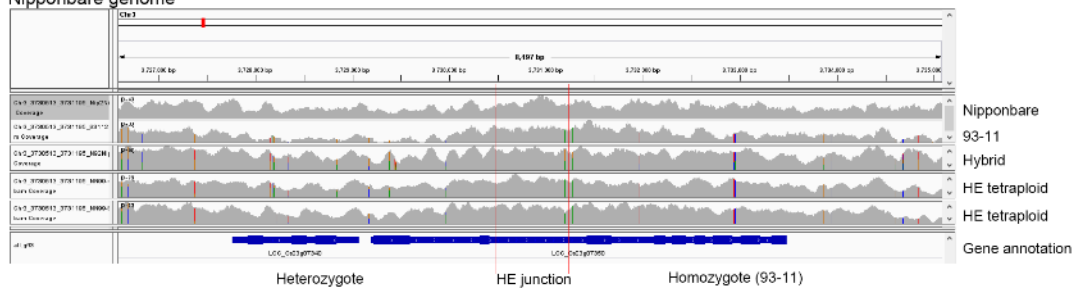

HE junction 69.

Nipponbare genome

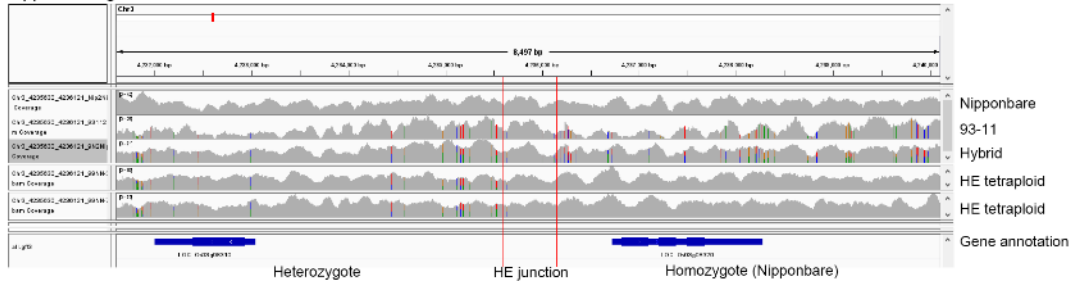

HE junction 70.

Nipponbare genome

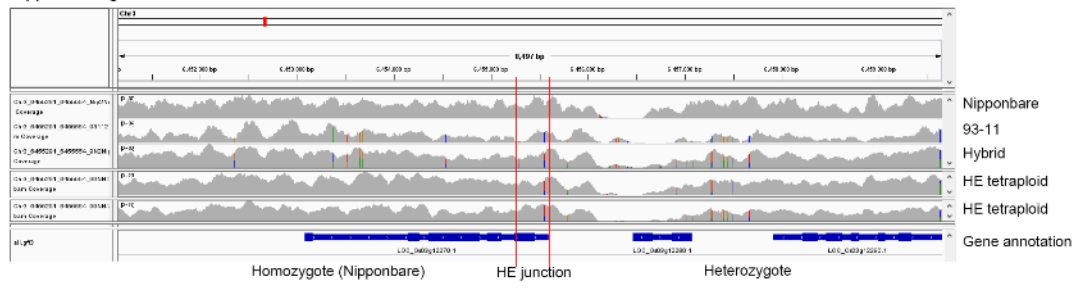

HE junction 71.

Nipponbare genome

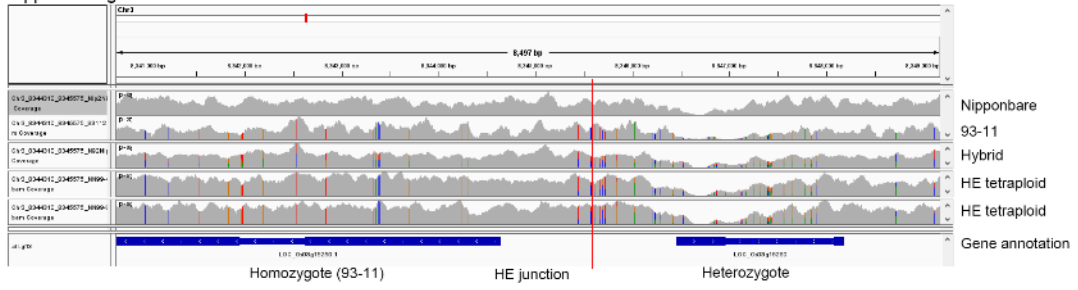

HE junction 72.

Nipponbare genome

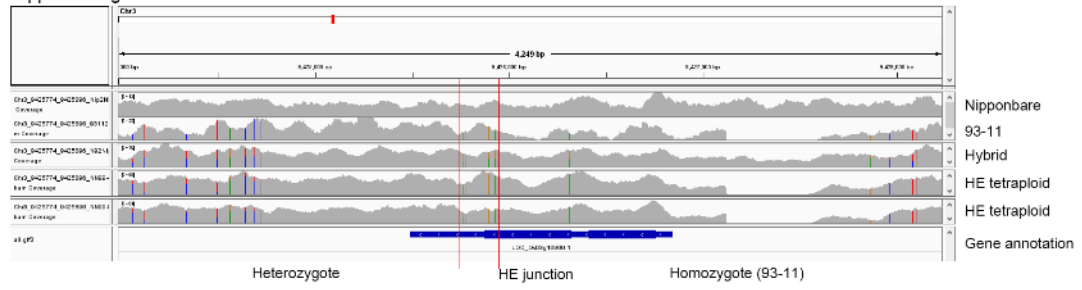

HE junction 73.

Nipponbare genome

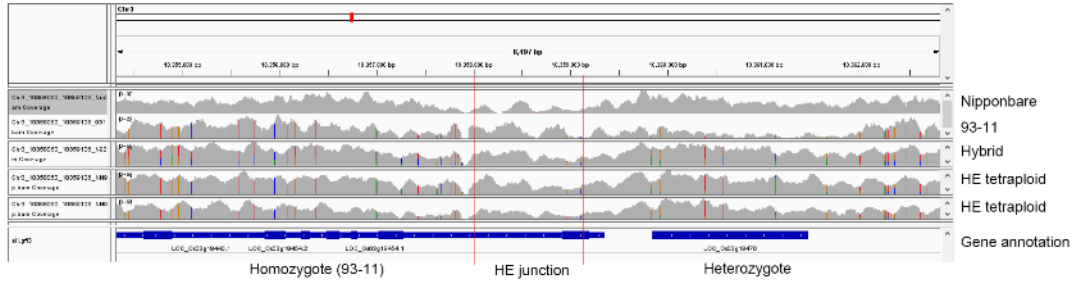

HE junction 74.

Nipponbare genome

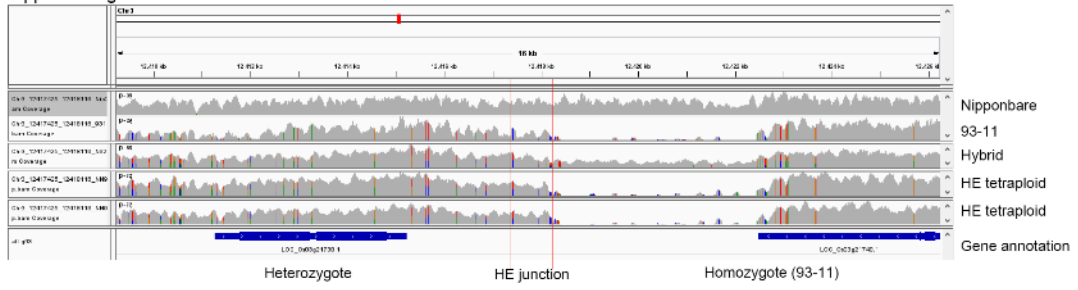

HE junction 75.

Nipponbare genome

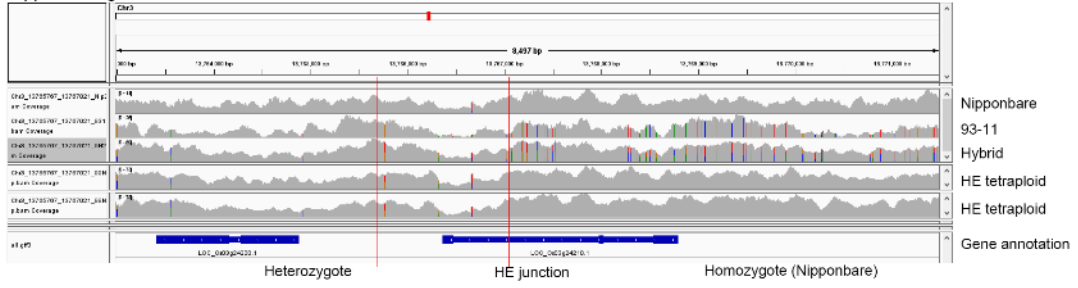

HE junction 76.



Nipponbare genome

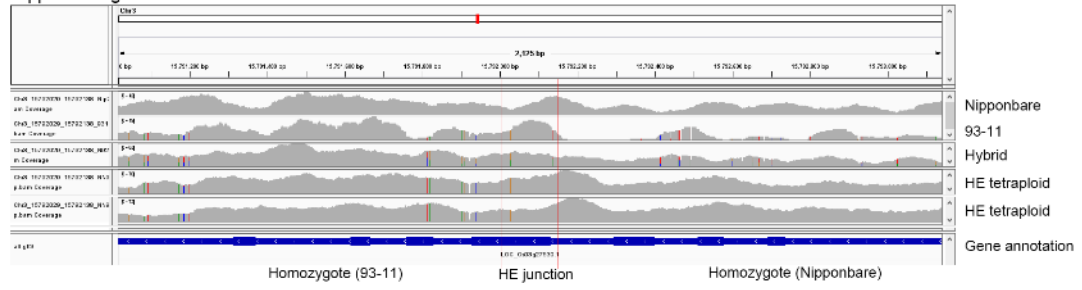

HE junction 77.

Nipponbare genome

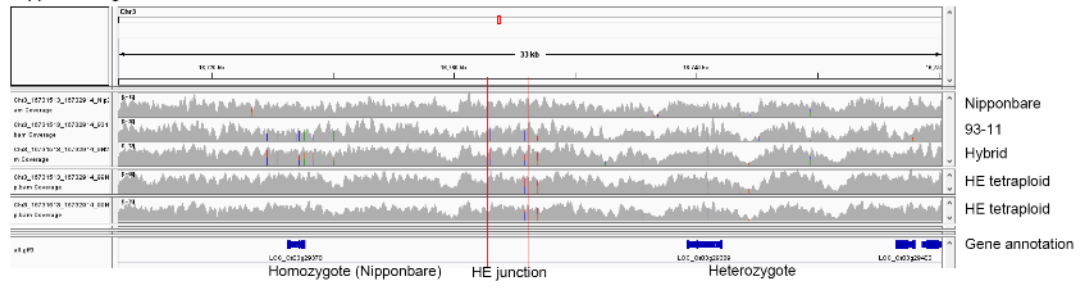

HE junction 78.

Nipponbare genome

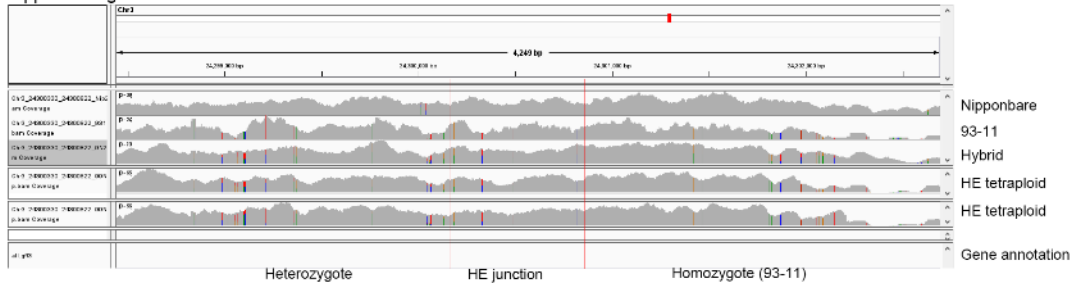

HE junction 79.

Nipponbare genome

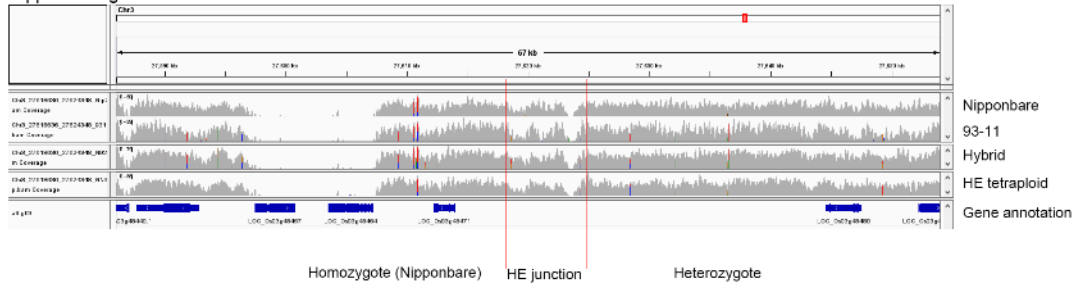

HE junction 80.

Nipponbare genome

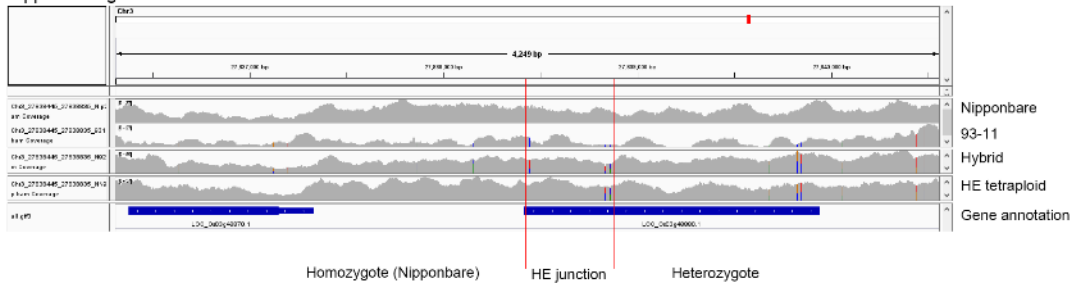

HE junction 81.

Nipponbare genome

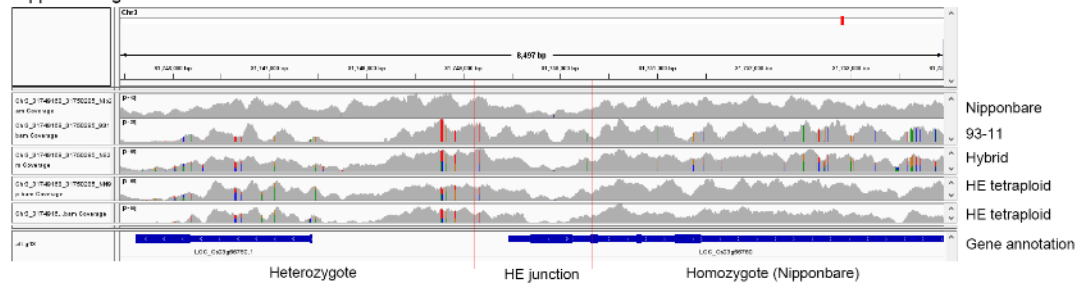

HE junction 82.

Nipponbare genome

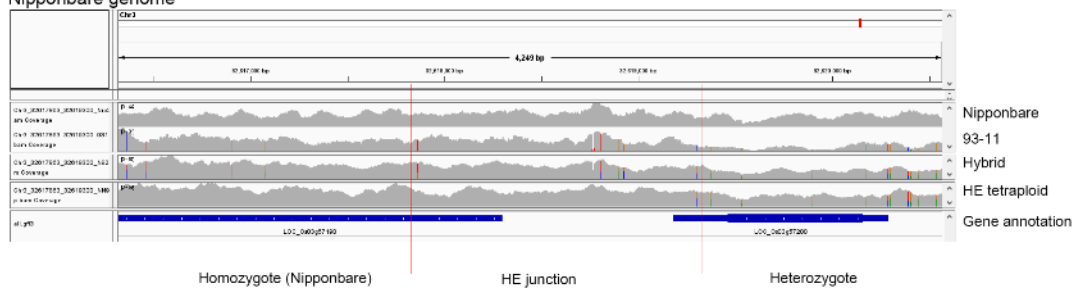

HE junction 83.

Nipponbare genome

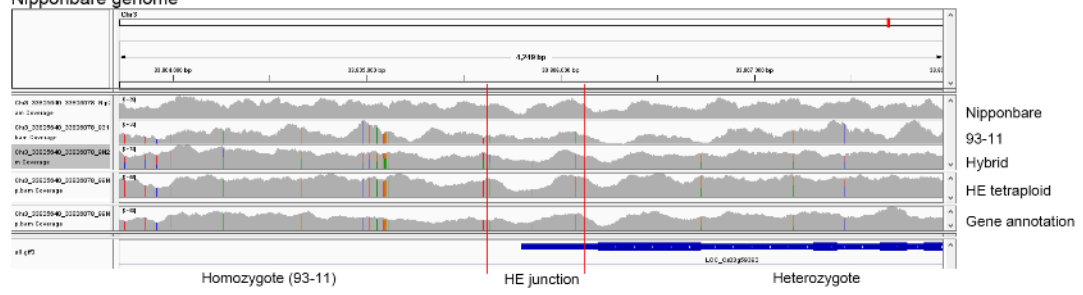

HE junction 84.



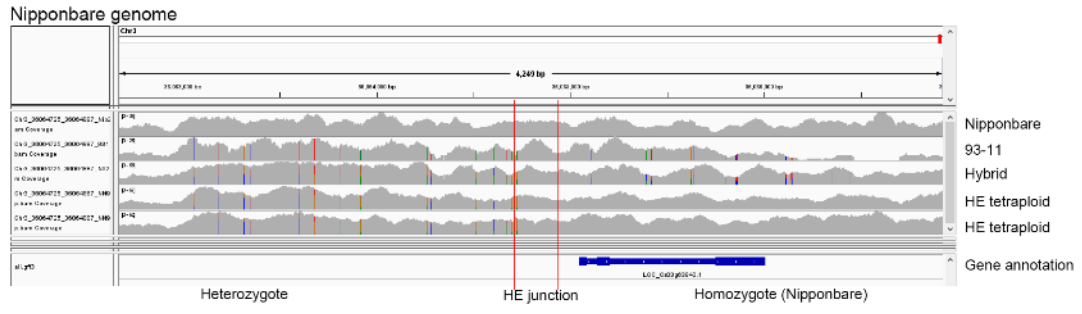

HE junction 85.

Nipponbare genome

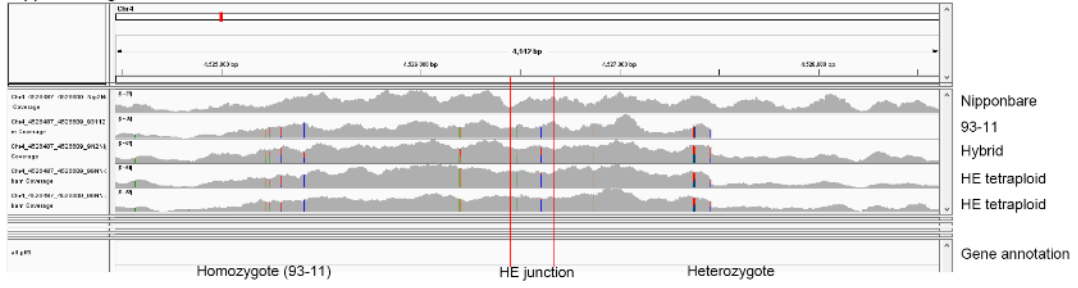

HE junction 87.

Nipponbare genome

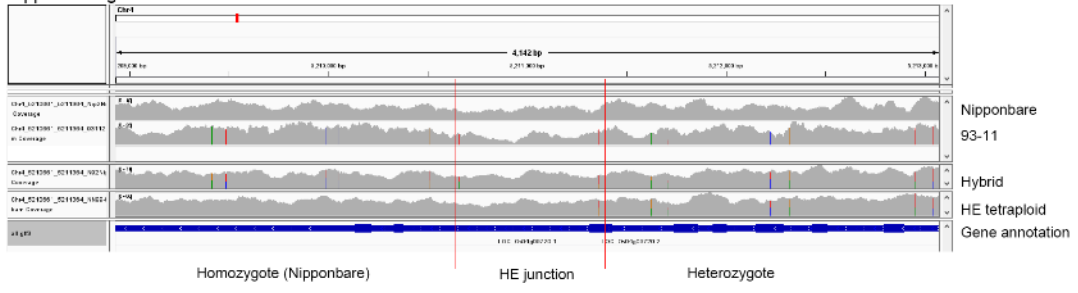

HE junction 88.

Nipponbare genome

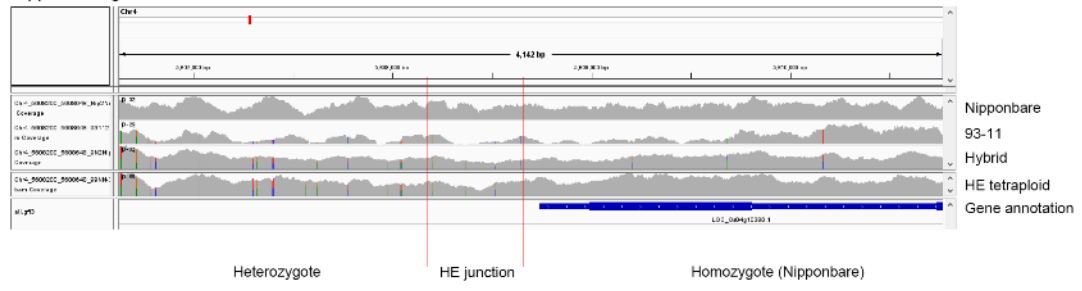

HE junction 89.

Nipponbare genome

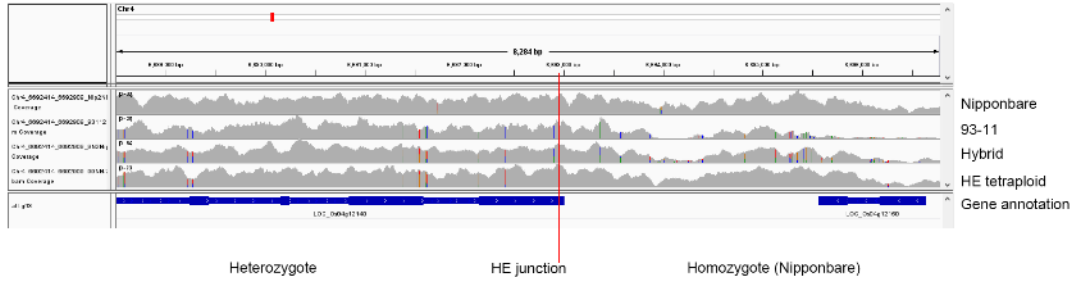

HE junction 90.

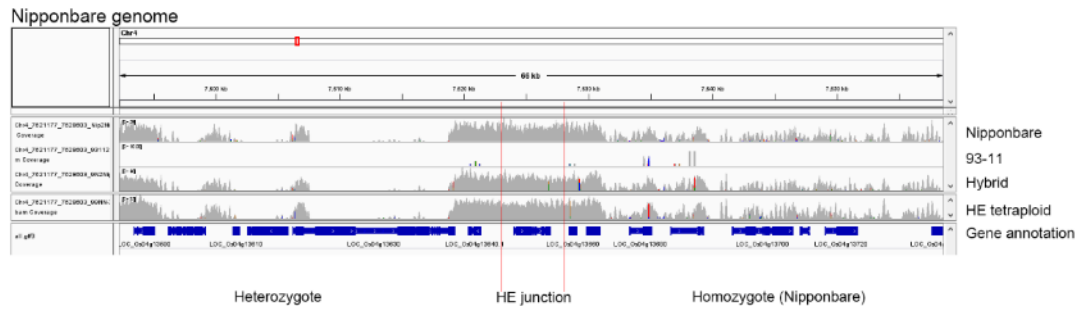

HE junction 91.

Nipponbare genome

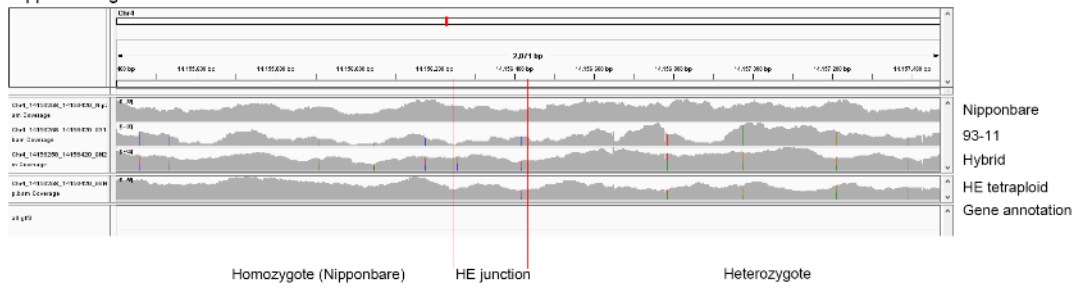

HE junction 92.

Nipponbare genome

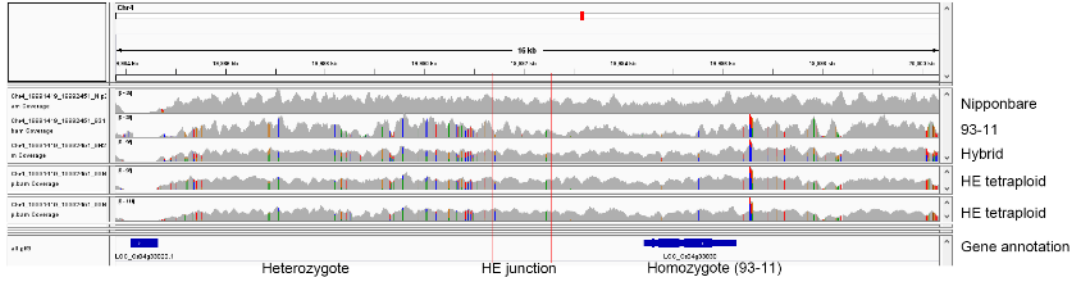

HE junction 93.



Nipponbare genome

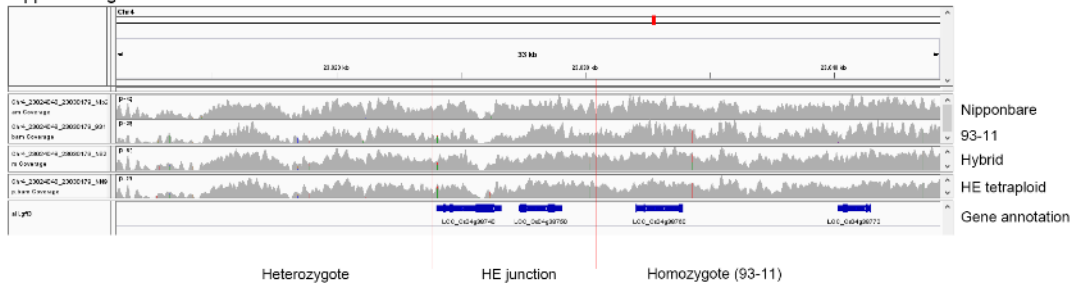

HE junction 94.

Nipponbare genome

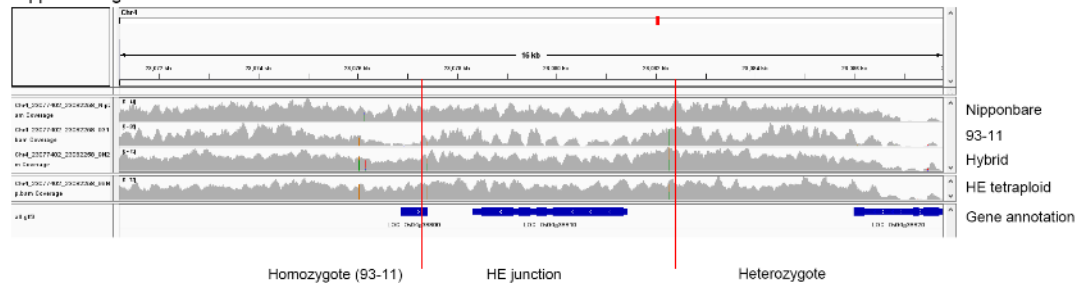

HE junction 95.

Nipponbare genome

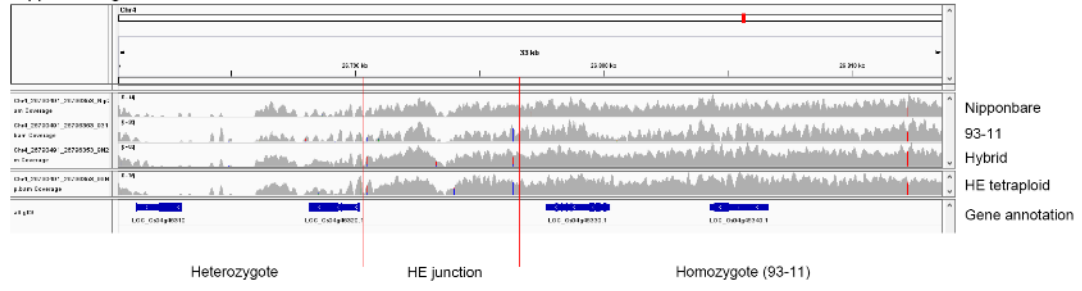

HE junction 96.

Nipponbare genome

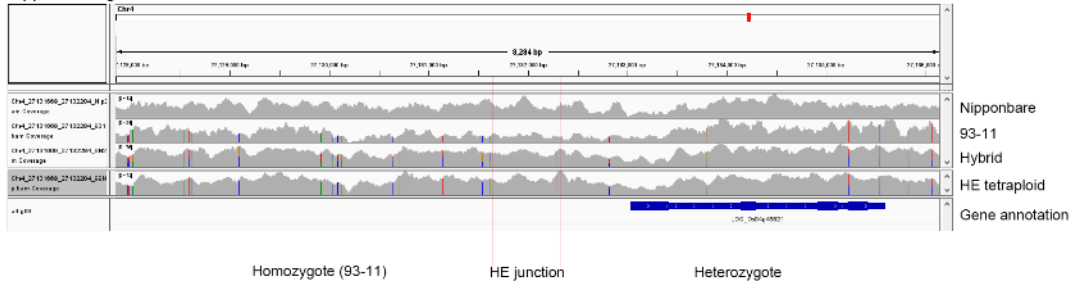

HE junction 97.

Nipponbare genome

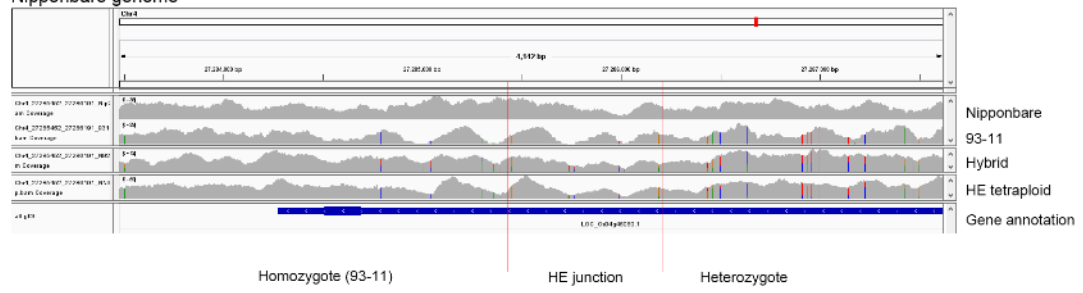

HE junction 98.

Nipponbare genome

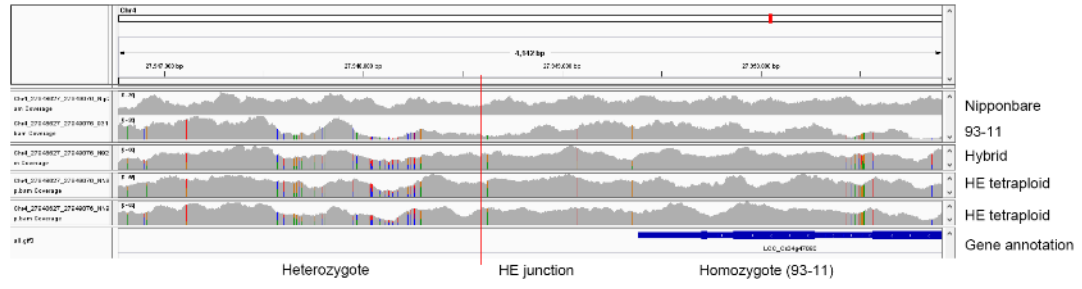

HE junction 99.

Nipponbare genome

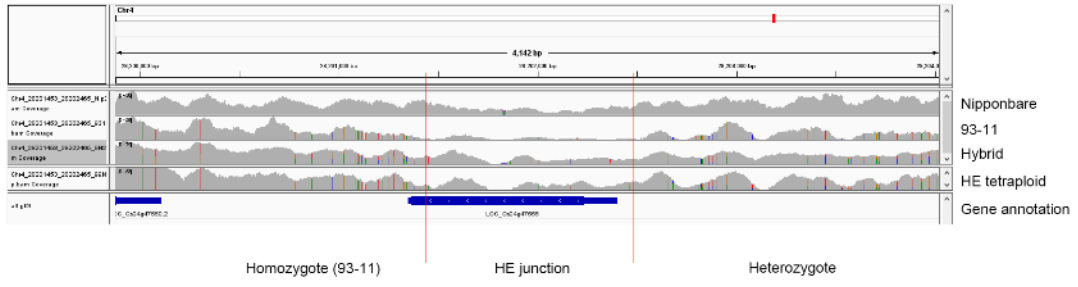

HE junction 100.

Nipponbare genome

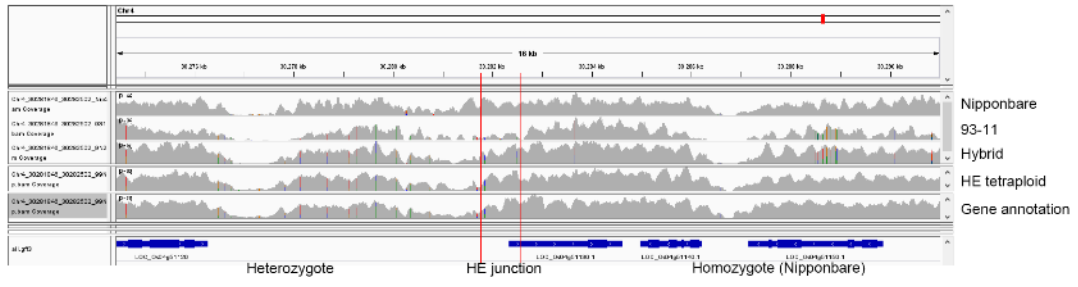

HE junction 101.



Nipponbare genome

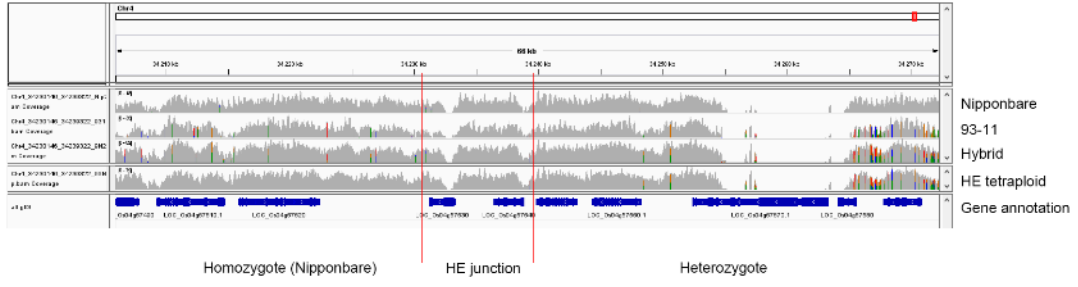

HE junction 102.

Nipponbare genome

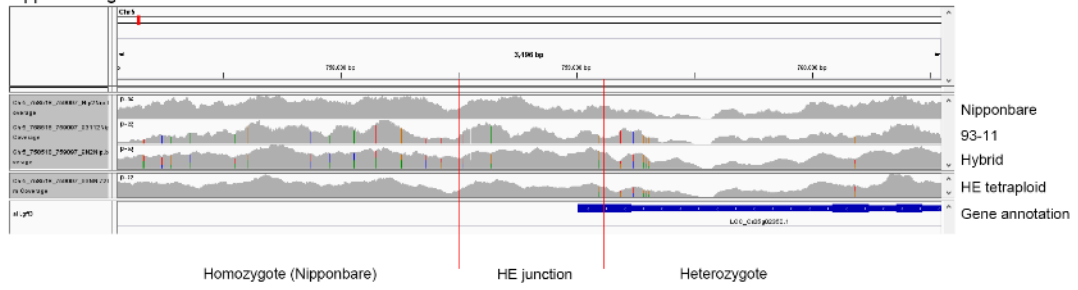

HE junction 103.

Nipponbare genome

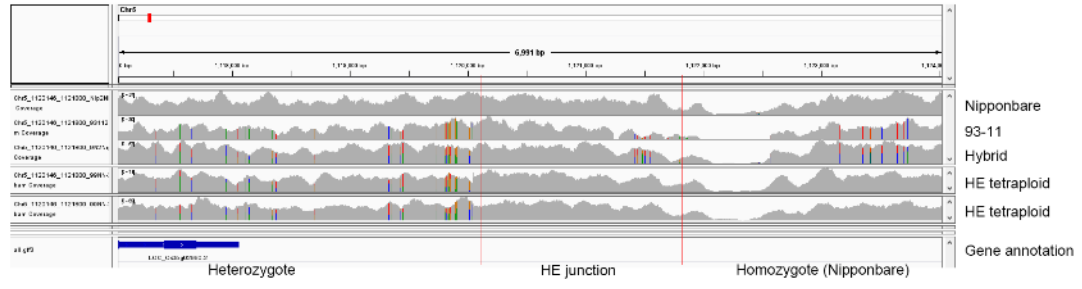

HE junction 104.

Nipponbare genome

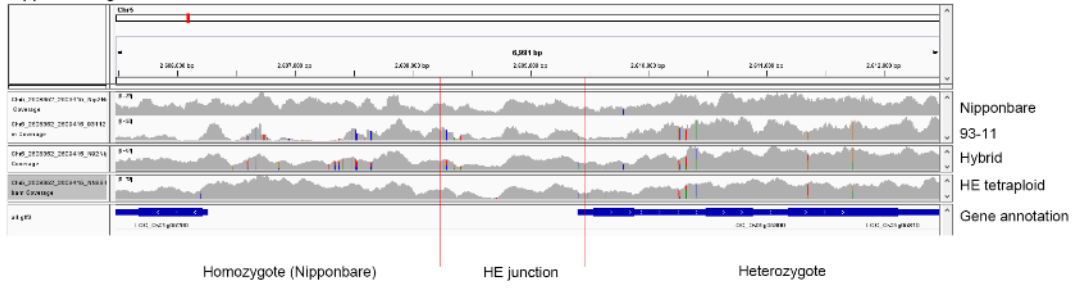

HE junction 105.

Nipponbare genome

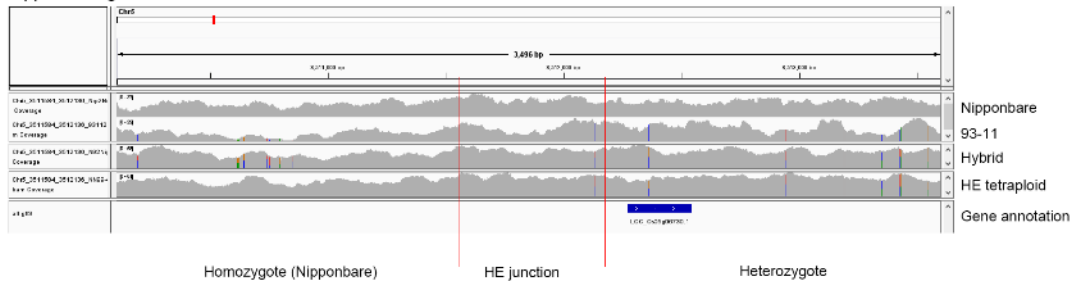

HE junction 106.

Nipponbare genome

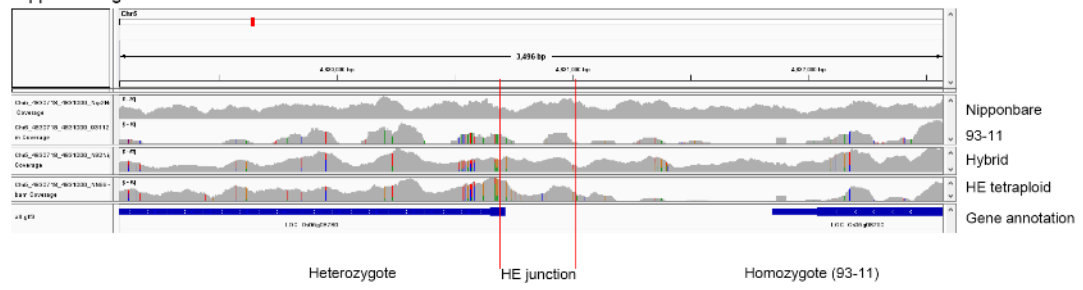

HE junction 107.

Nipponbare genome

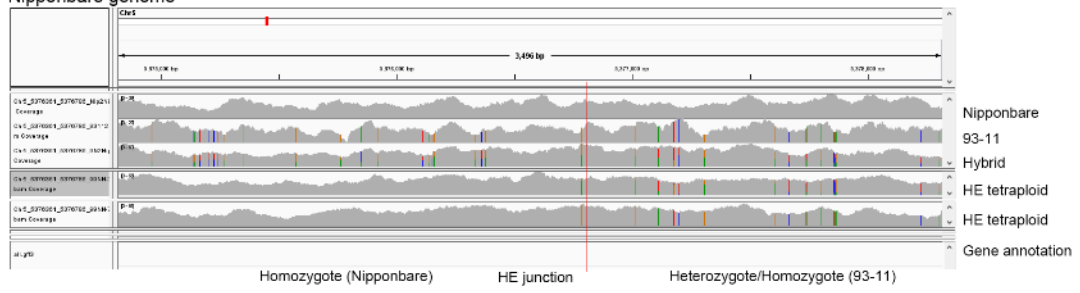

HE junction 108.

Nipponbare genome

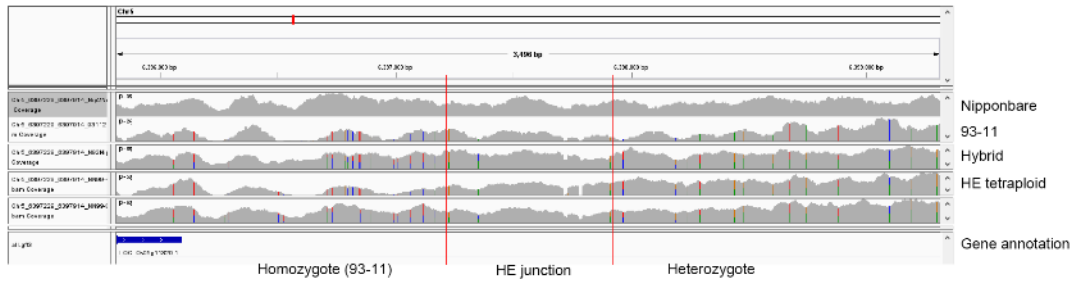

HE junction 109.



Nipponbare genome

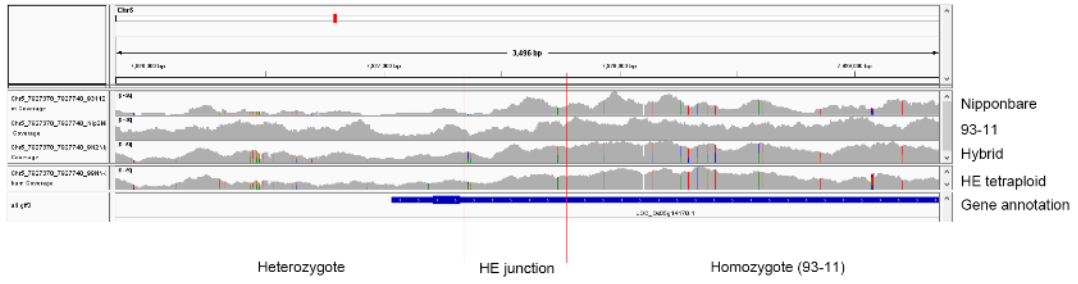

HE junction 110.

Nipponbare genome

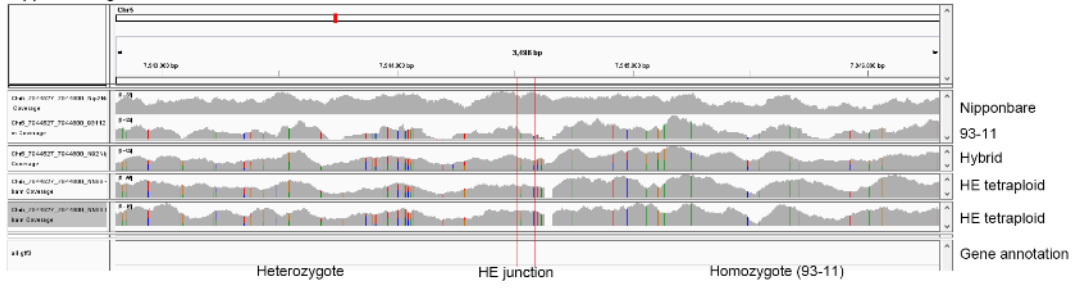

HE junction 111.

Nipponbare genome

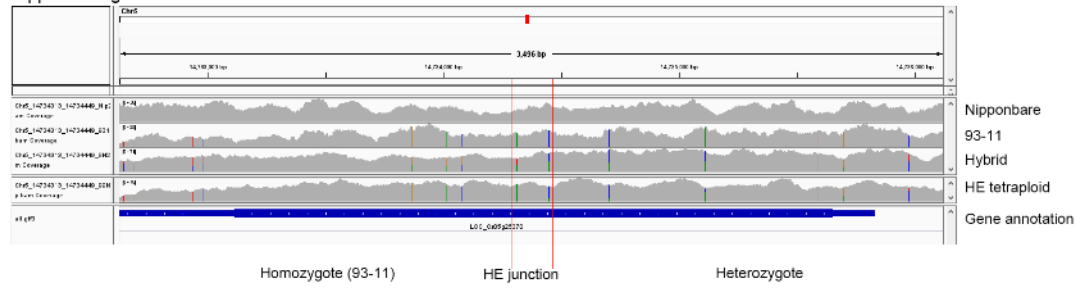

HE junction 112.

Nipponbare genome

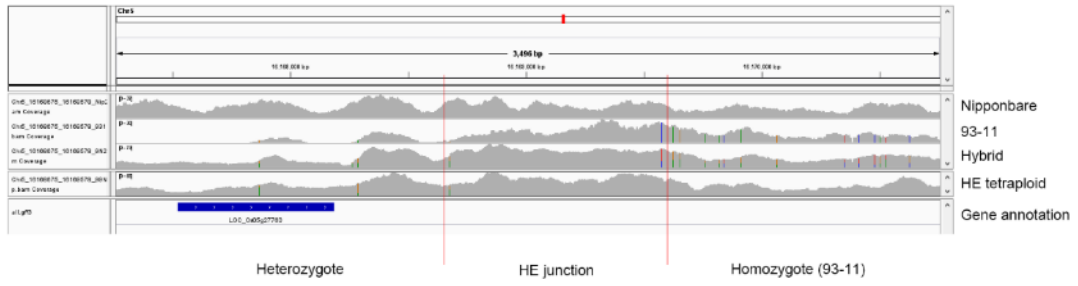

HE junction 113.

Nipponbare genome

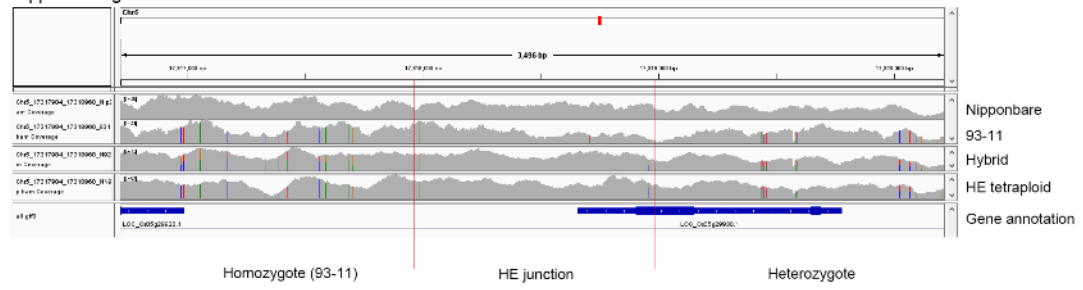

HE junction 114.

Nipponbare genome

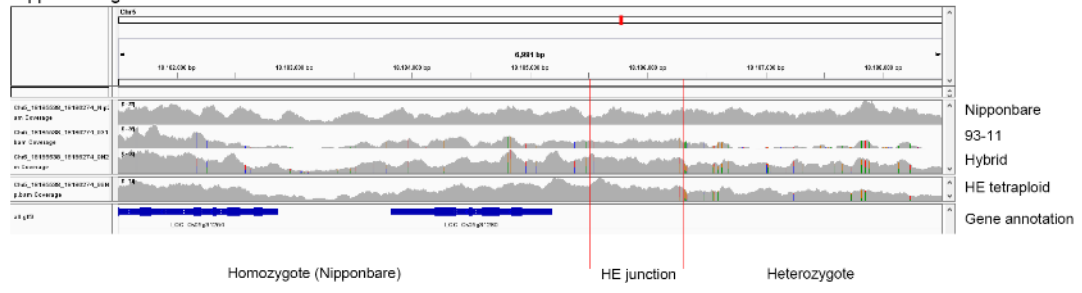

HE junction 115.

Nipponbare genome

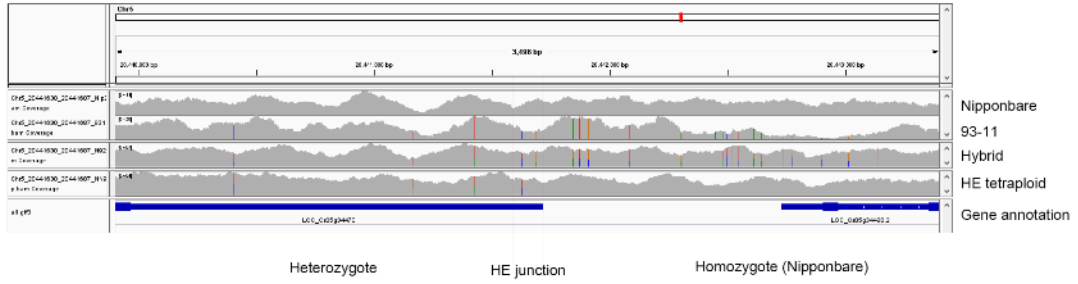

HE junction 116.

Nipponbare genome

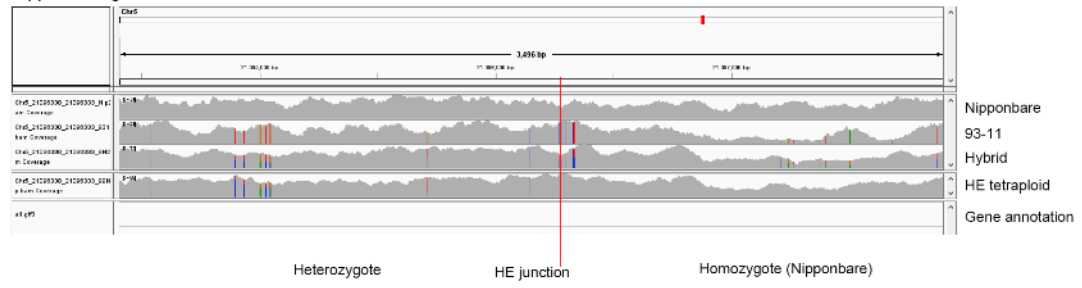

HE junction 117.



Nipponbare genome

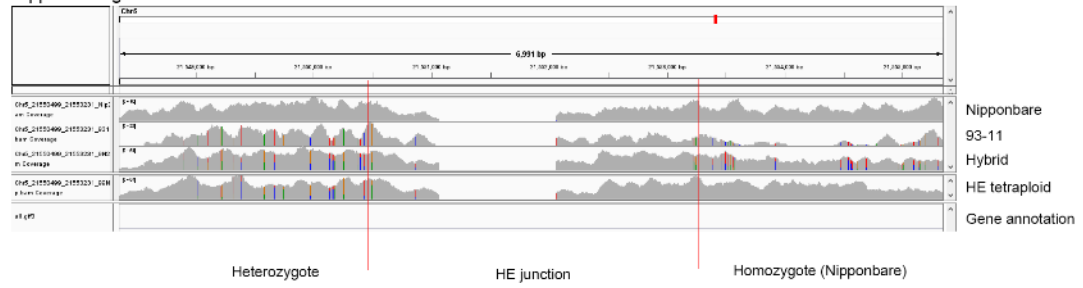

HE junction 118.

Nipponbare genome

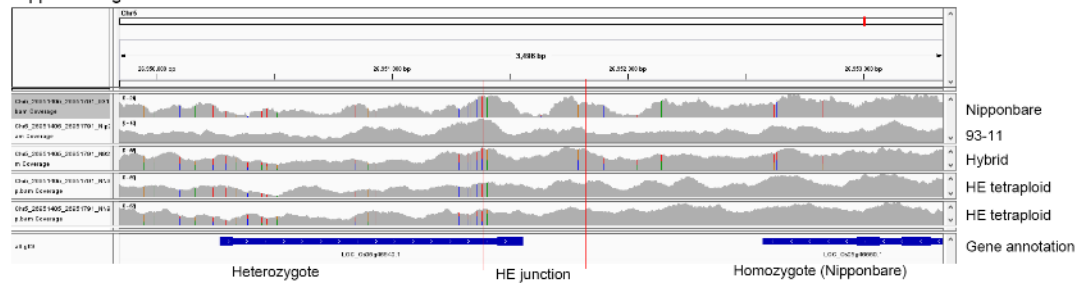

HE junction 119.

Nipponbare genome

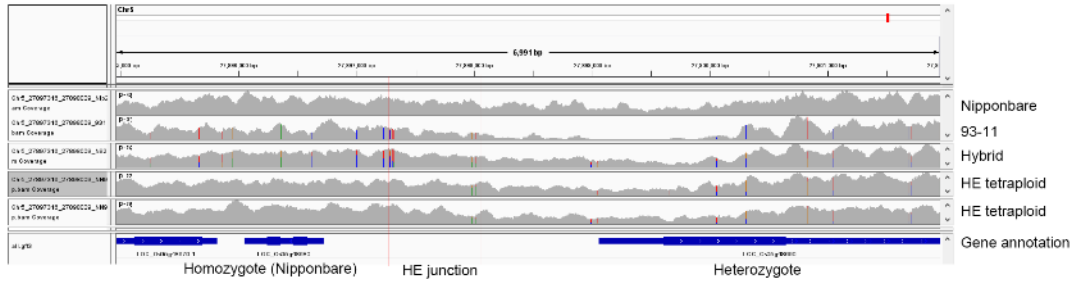

HE junction 120.

Nipponbare genome

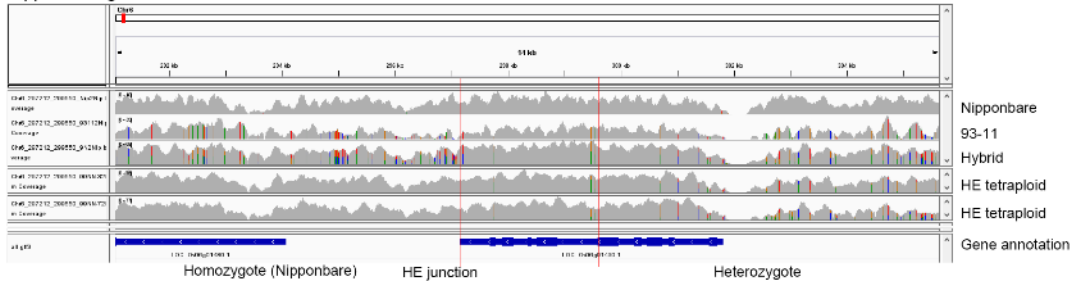

HE junction 121.

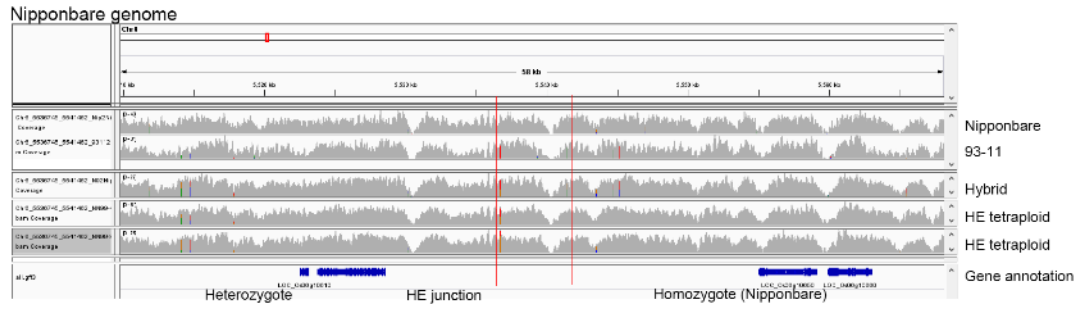

HE junction 122.

Nipponbare genome

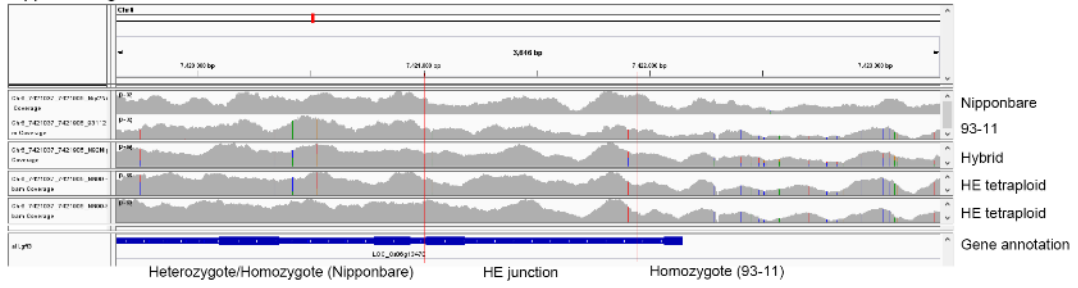

HE junction 123.

Nipponbare genome

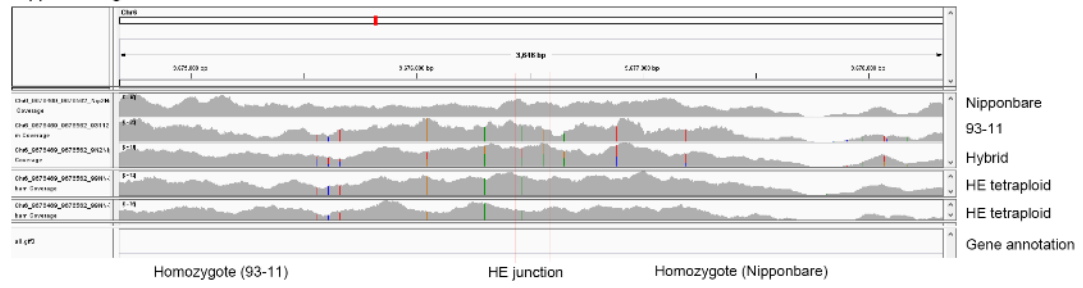

HE junction 124.

Nipponbare genome

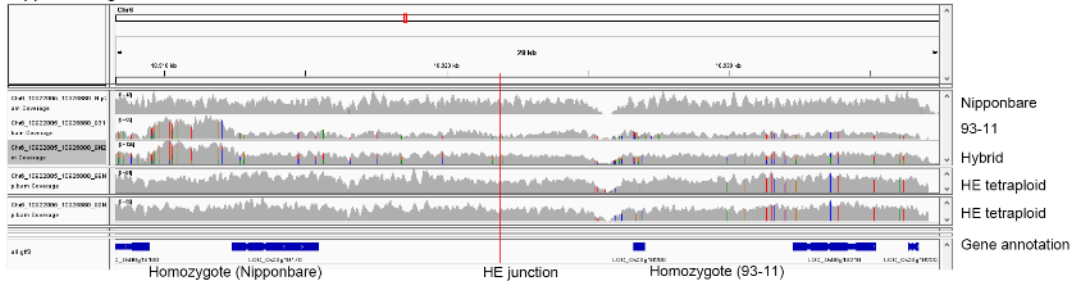

HE junction 125.



Nipponbare genome

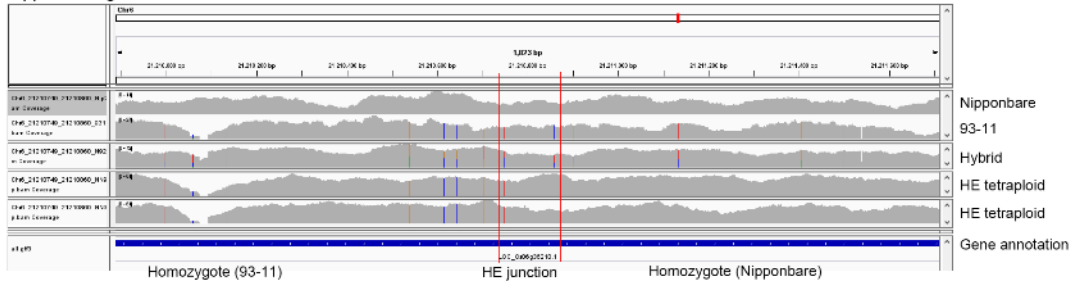

HE junction 126.

Nipponbare genome

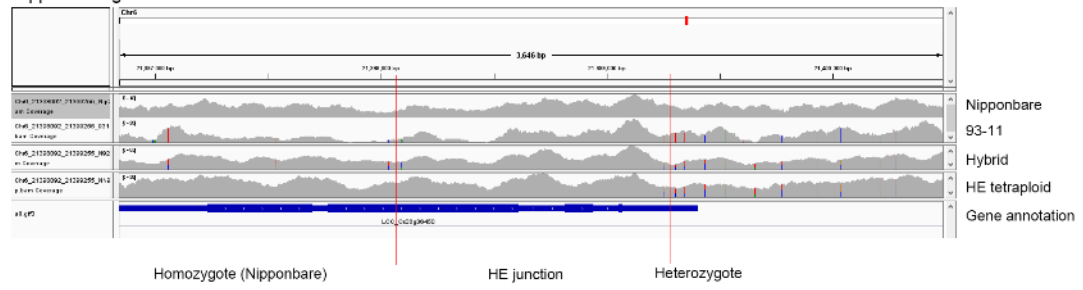

HE junction 127.

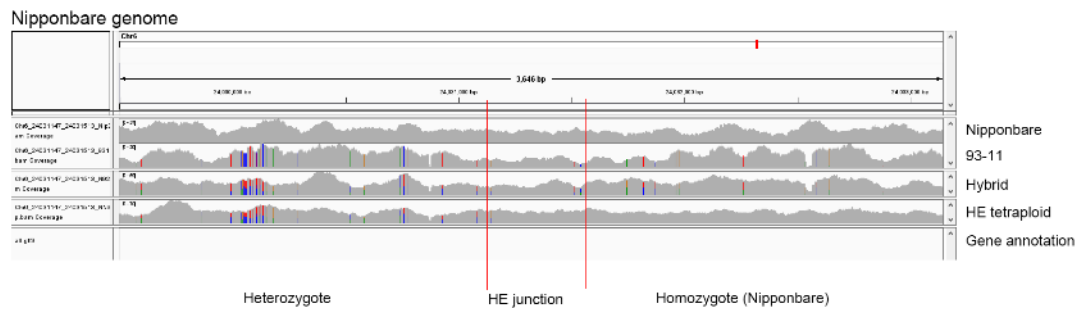

HE junction 128.

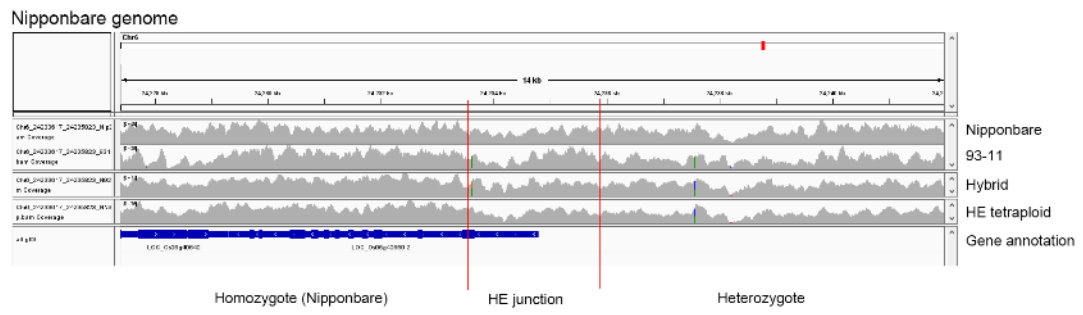

HE junction 129.

Nipponbare genome

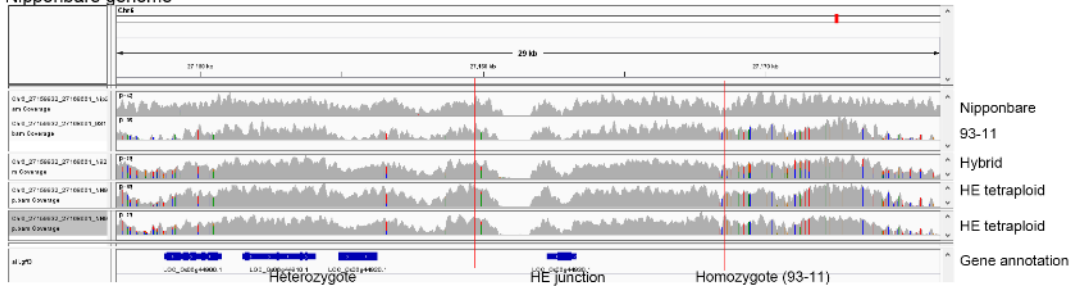

HE junction 130.

Nipponbare genome

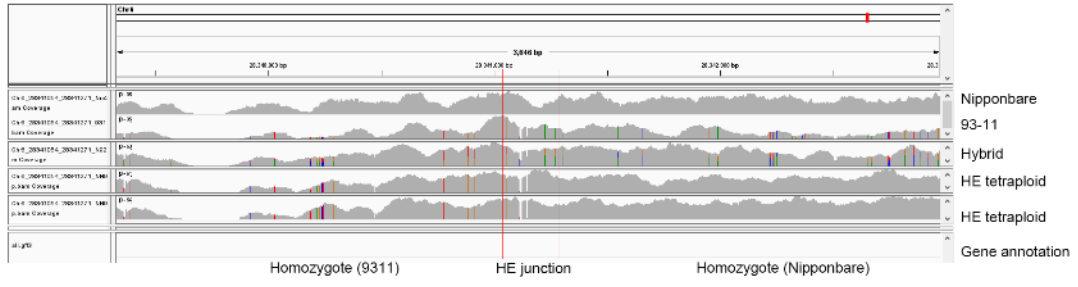

HE junction 131.

Nipponbare genome

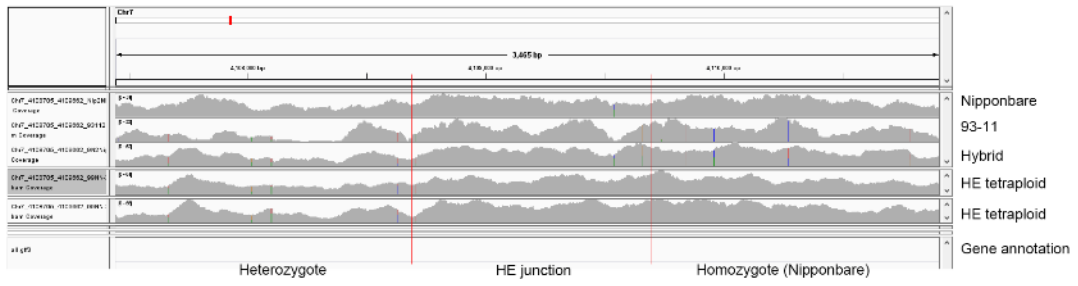

HE junction 132.

Nipponbare genome

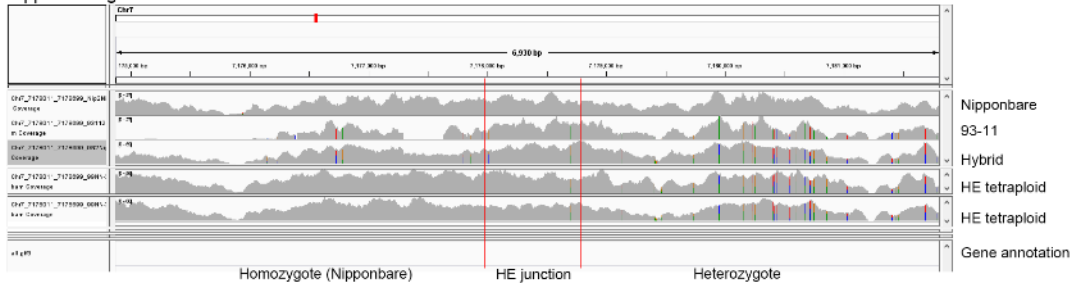

HE junction 134.



Nipponbare genome

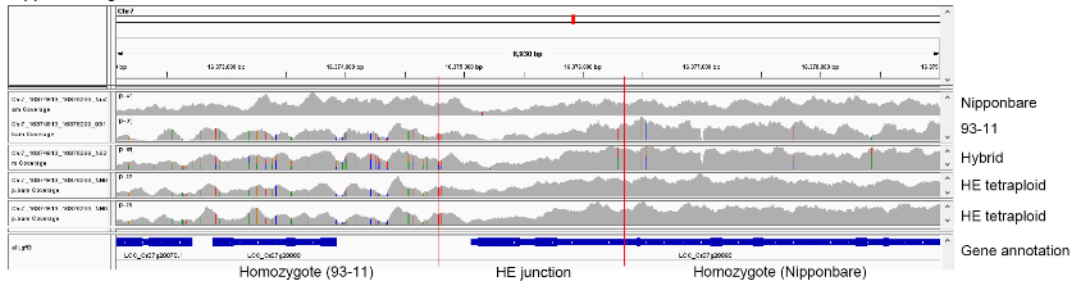

HE junction 135.

Nipponbare genome

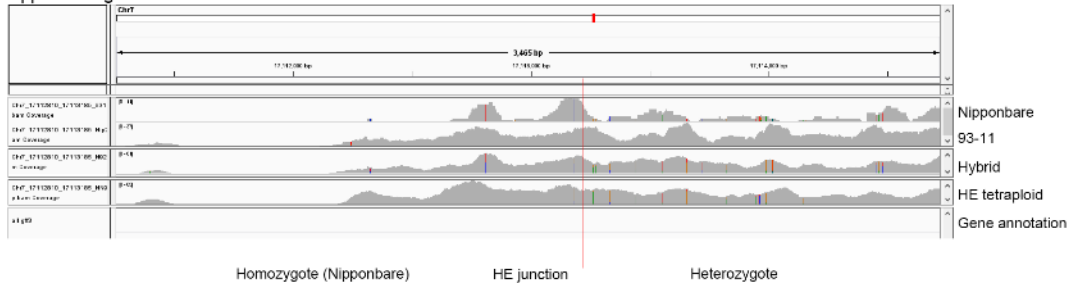

HE junction 136.

Nipponbare genome

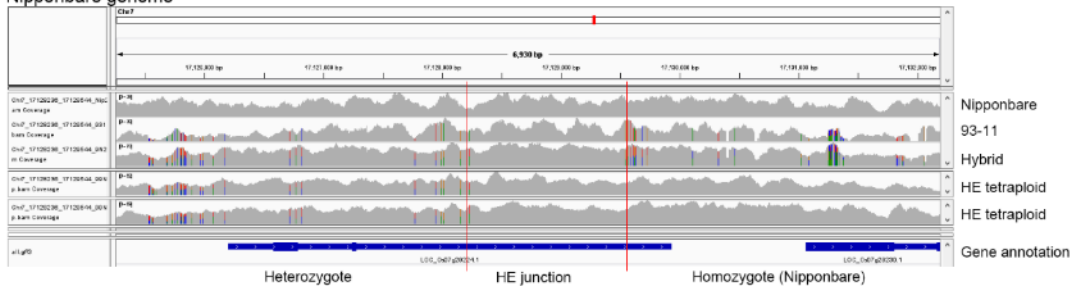

HE junction 137.

Nipponbare genome

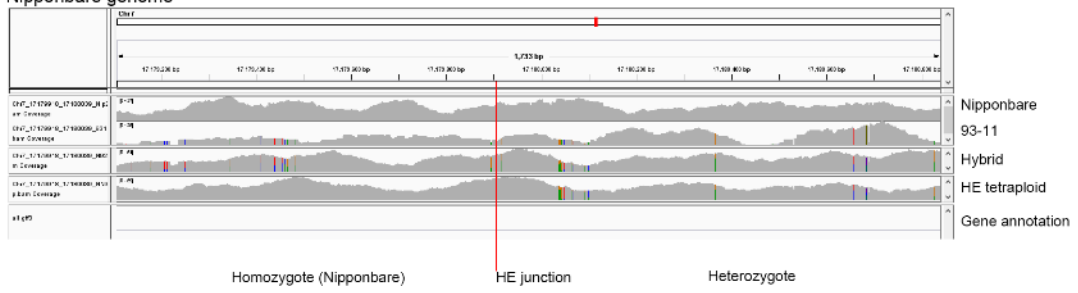

HE junction 138.

Nipponbare genome

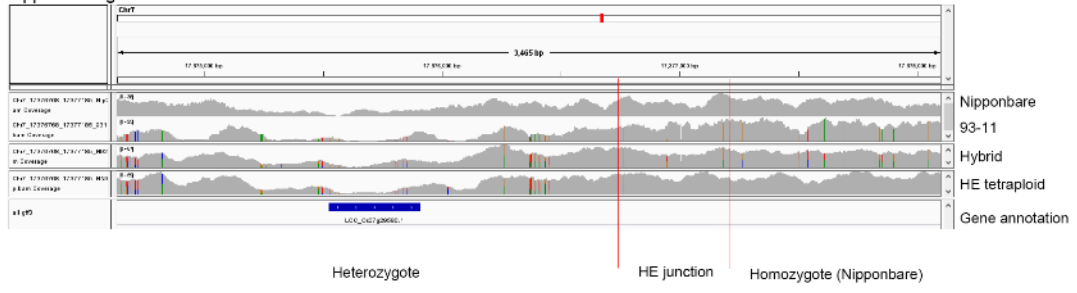

HE junction 139.

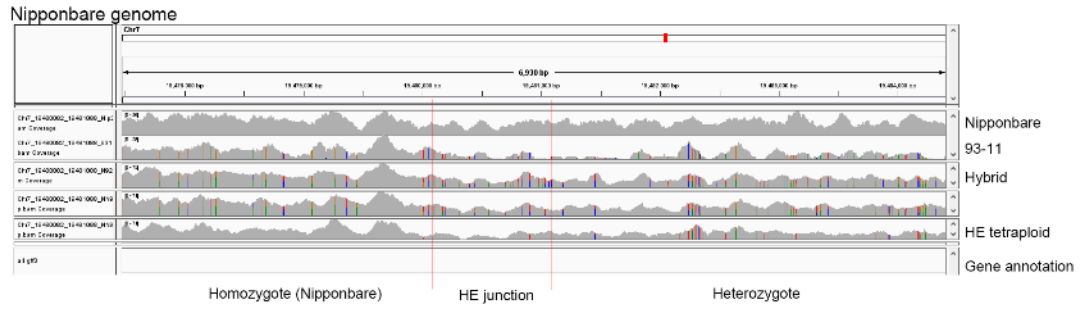

HE junction 140.

Nipponbare genome

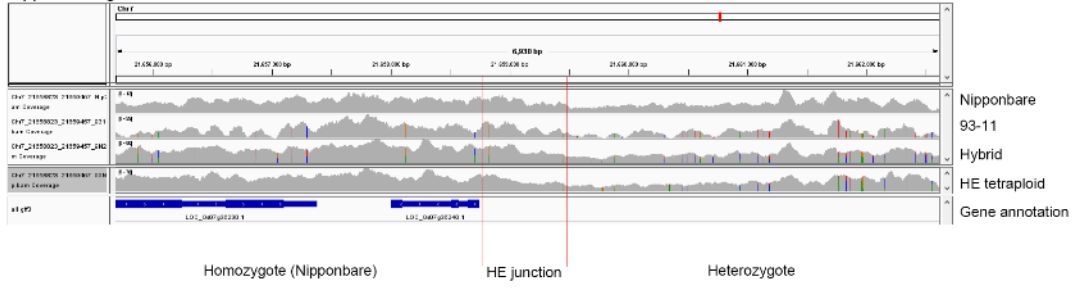

HE junction 141.

Nipponbare genome

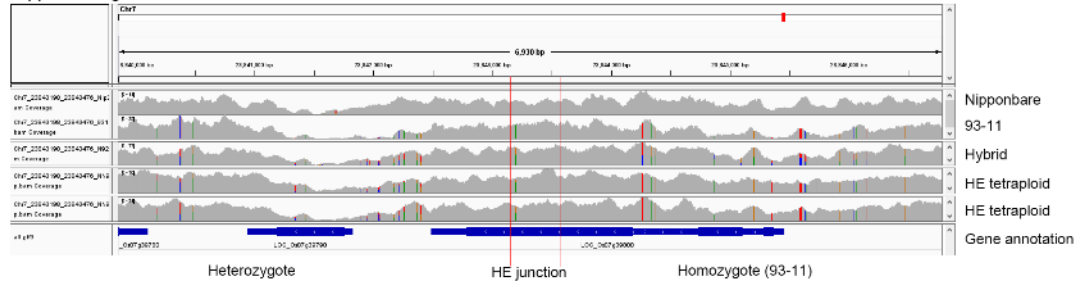

HE junction 142.



Nipponbare genome

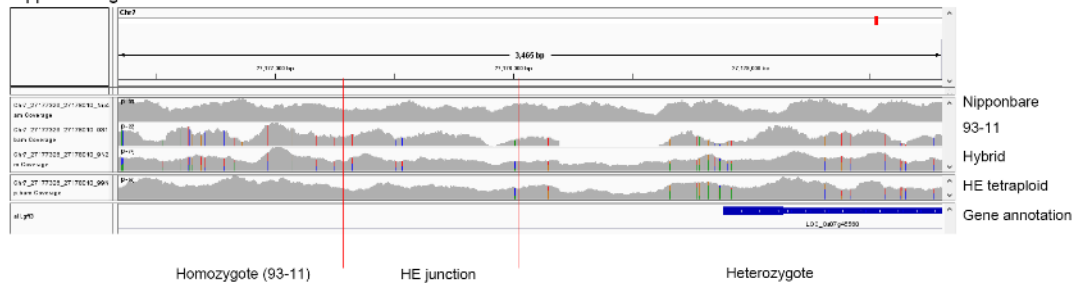

HE junction 143.

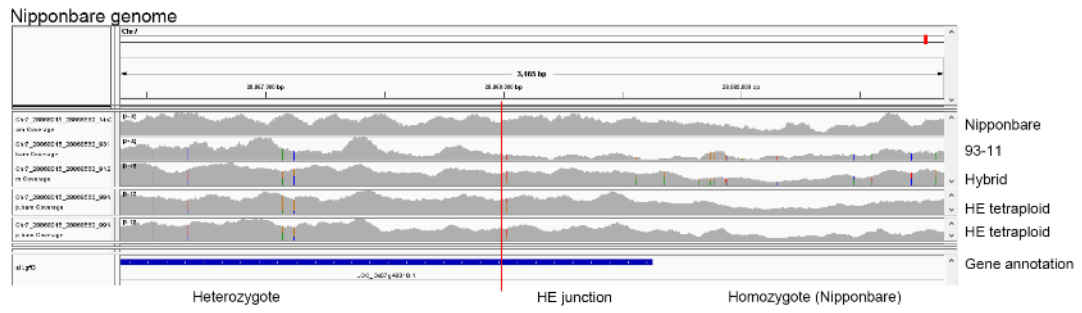

HE junction 144.

Nipponbare genome

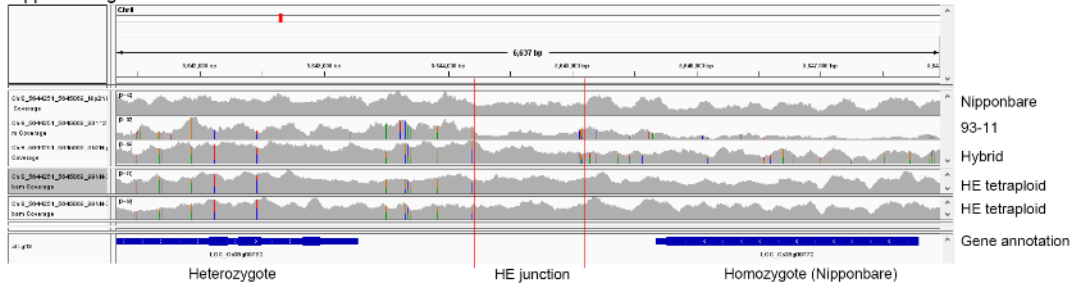

HE junction 145.

Nipponbare genome

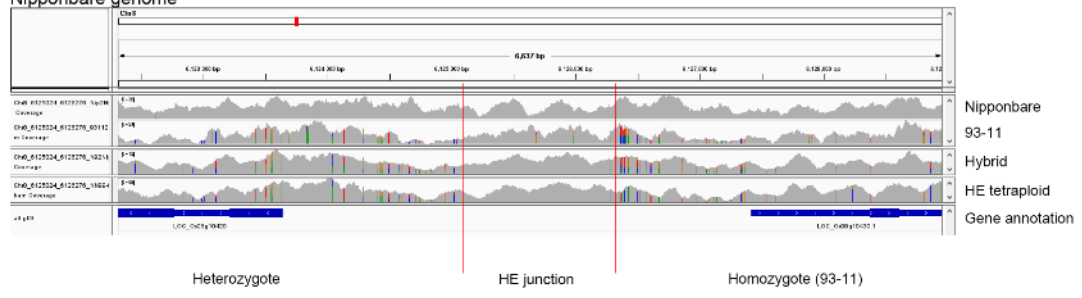

HE junction 146.

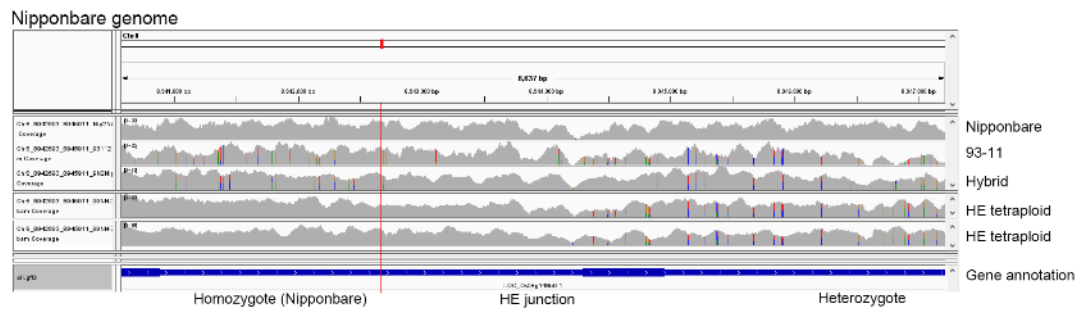

HE junction 147.

Nipponbare genome

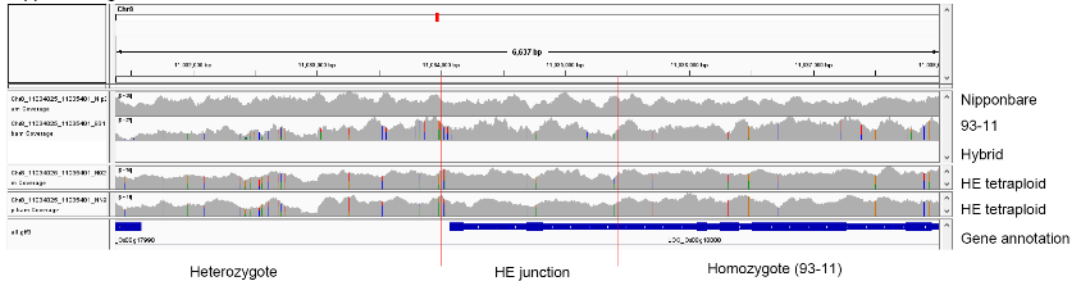

HE junction 148.

Nipponbare genome

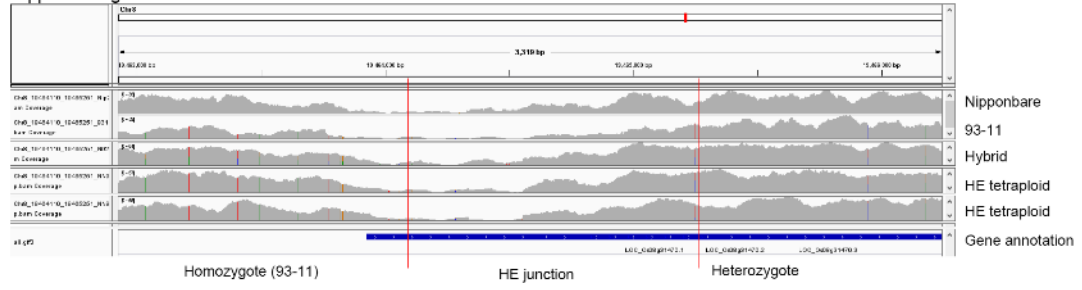

HE junction 149.

Nipponbare genome

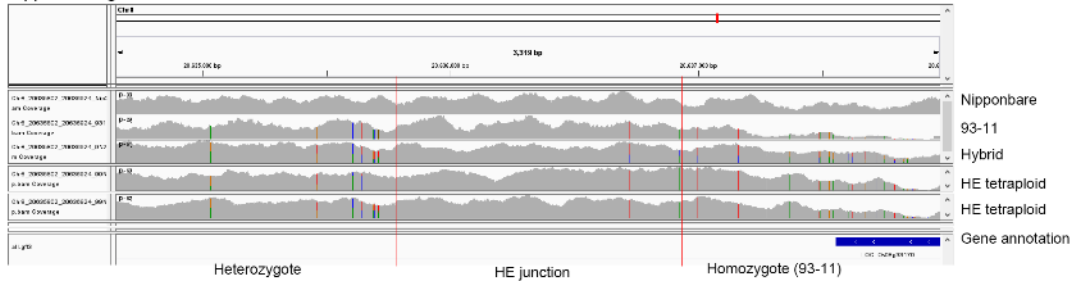

HE junction 150.



Nipponbare genome

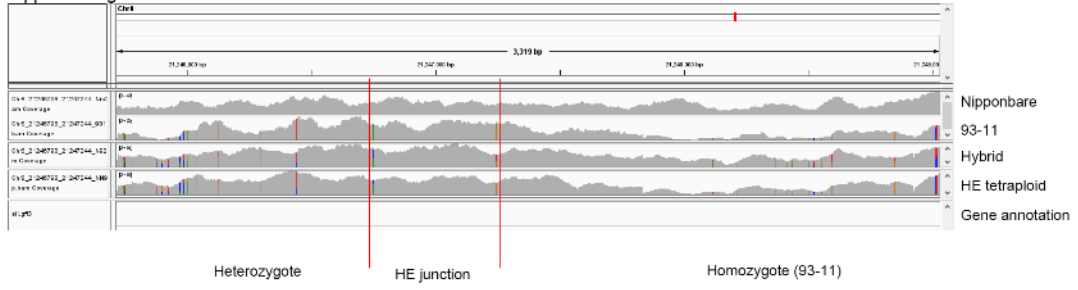

HE junction 151.

Nipponbare genome

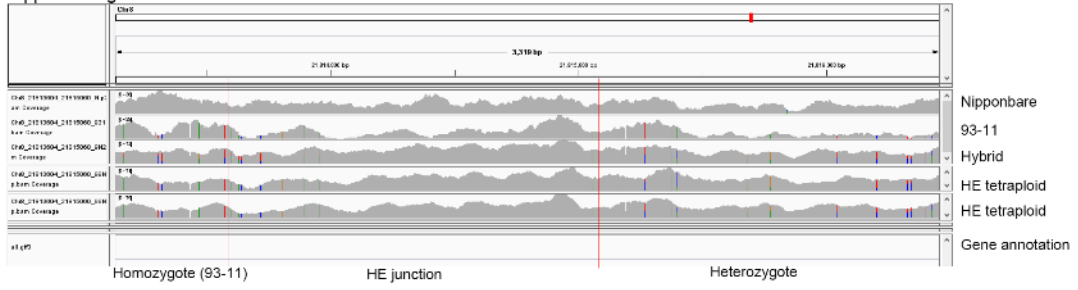

HE junction 152.

Nipponbare genome

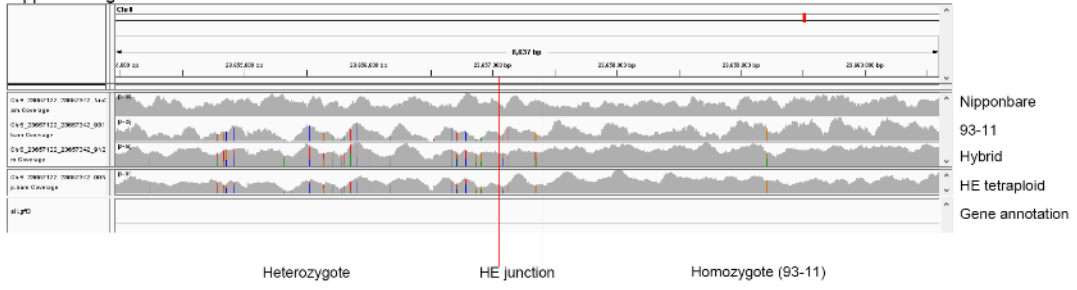

HE junction 153.

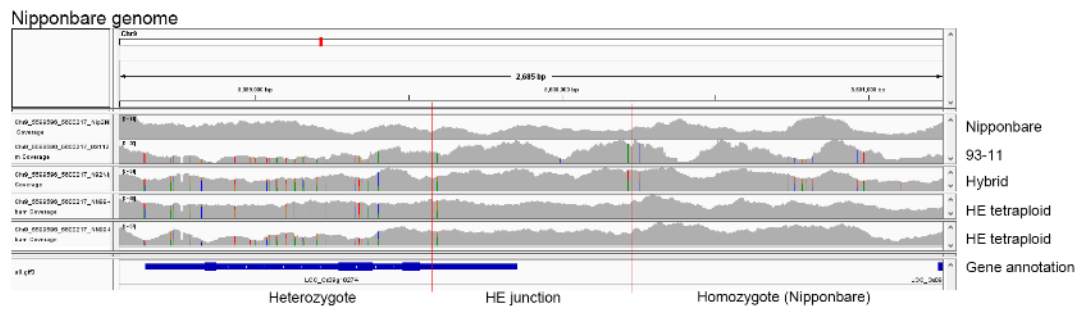

HE junction 154.

Nipponbare genome

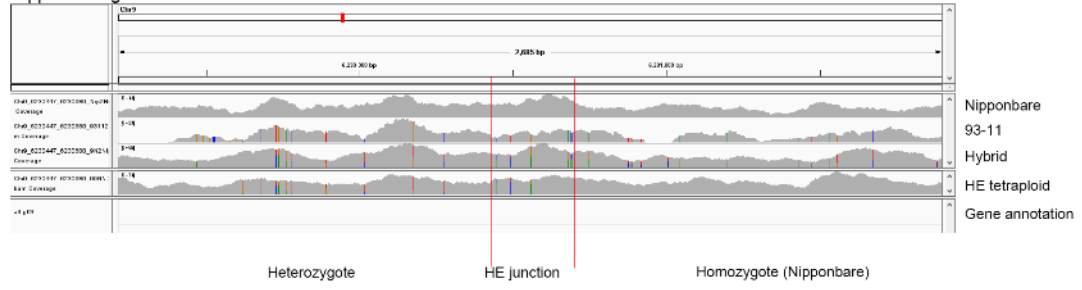

HE junction 155.

Nipponbare genome

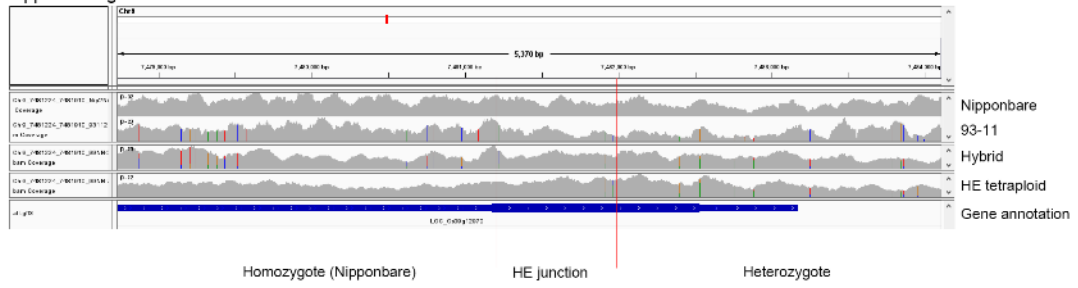

HE junction 156.

Nipponbare genome

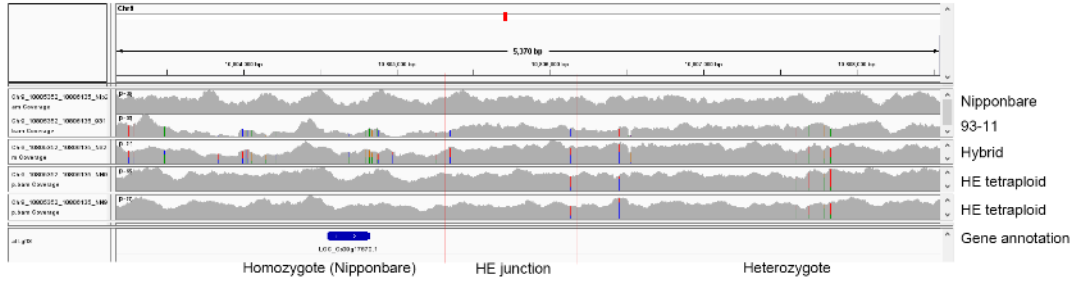

HE junction 157.

Nipponbare genome

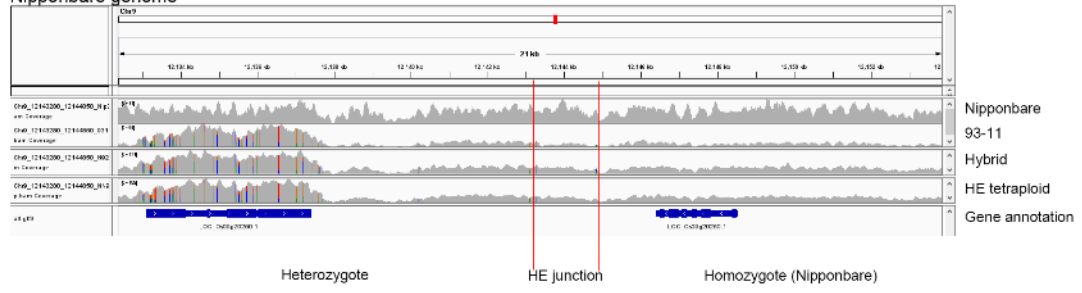

HE junction 158.



Nipponbare genome

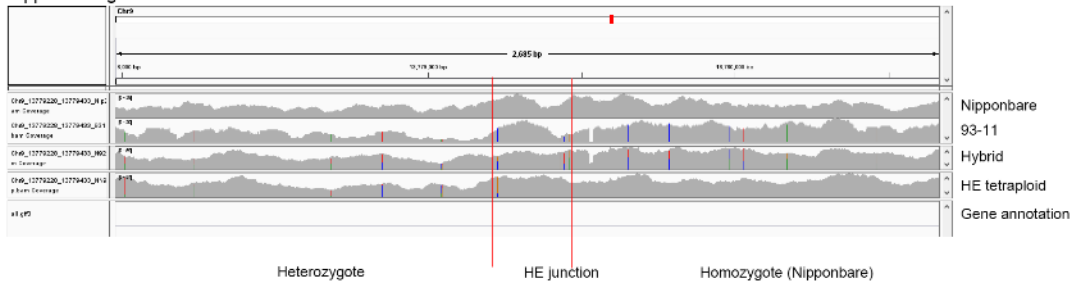

HE junction 159.

Nipponbare genome

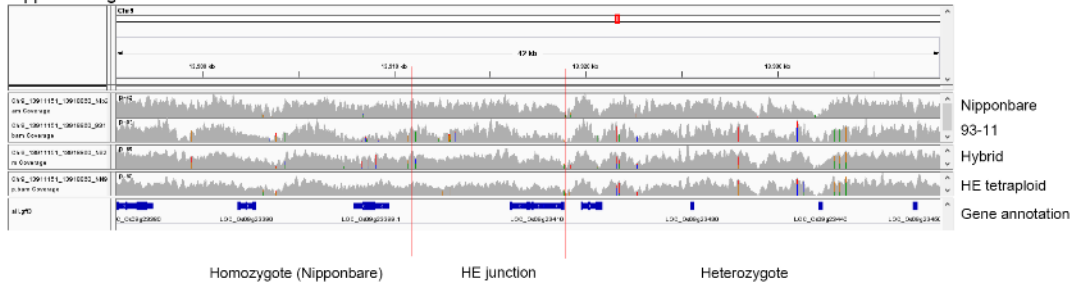

HE junction 160.

Nipponbare genome

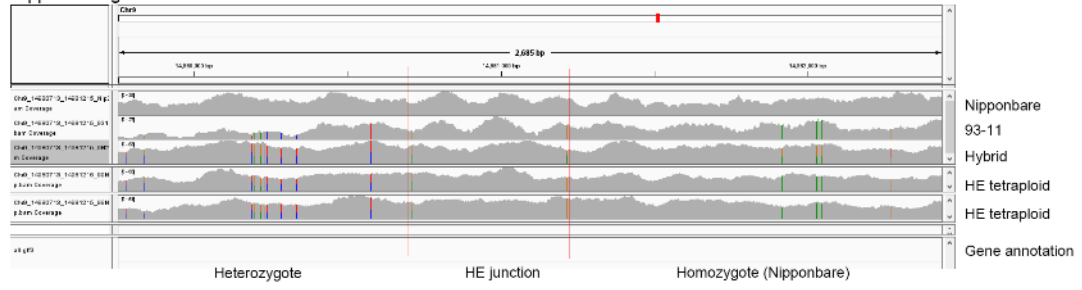

HE junction 161.

Nipponbare genome

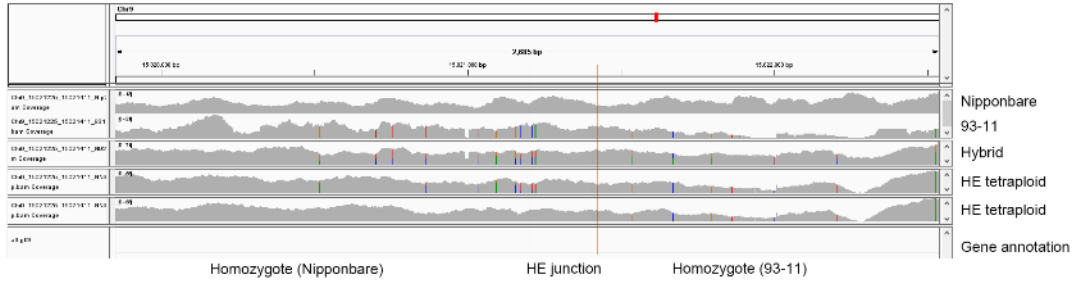

HE junction 162.

Nipponbare genome

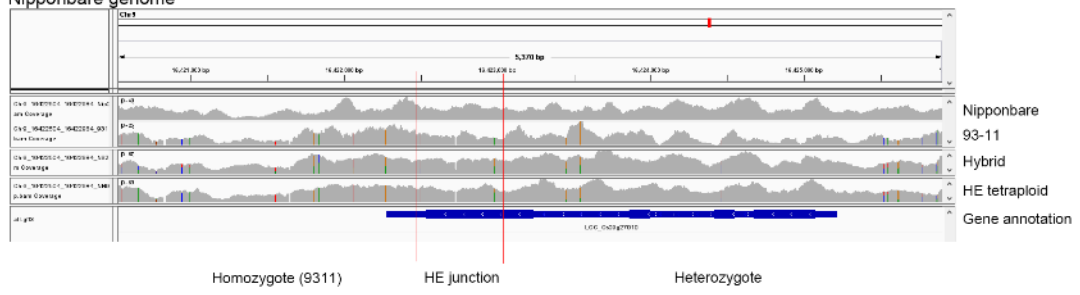

HE junction 163.

Nipponbare genome

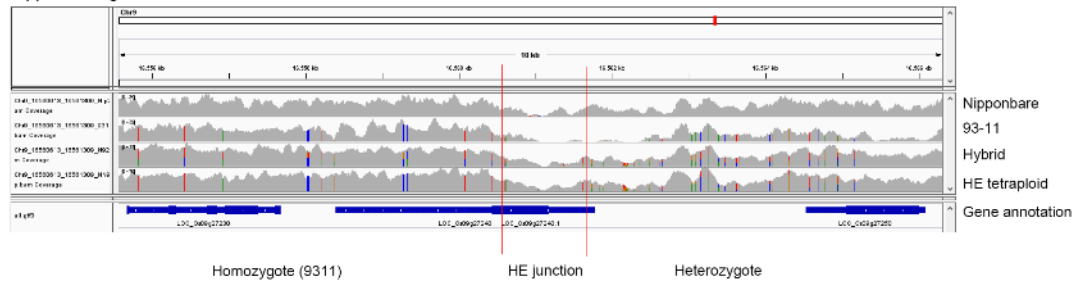

HE junction 164.

Nipponbare genome

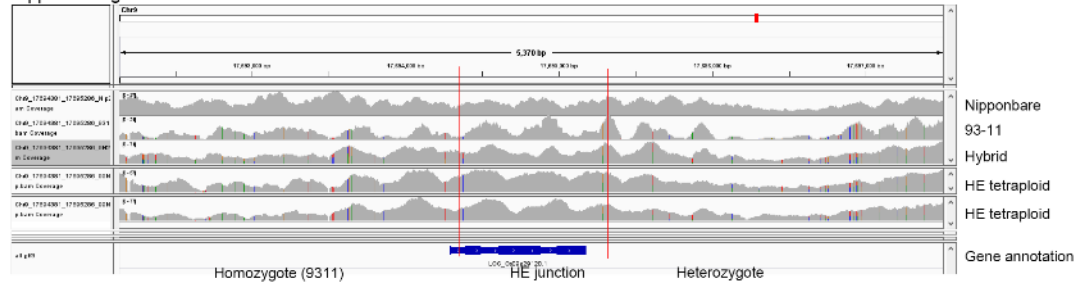

HE junction 165.

Nipponbare genome

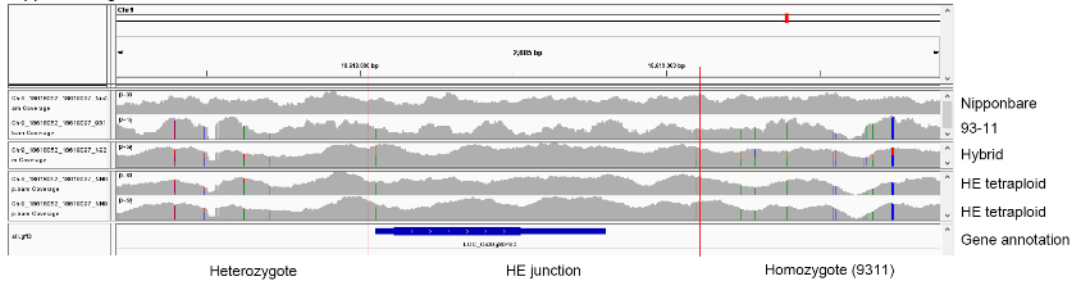

HE junction 166.



Table S1. Chromosome positions of HE junction in wheat A and D subgenomes.

| Chr. D | Start D   | End D     | Chr. A | Start A   | End A     | Samples | Type <sup>1</sup> | Rank   |
|--------|-----------|-----------|--------|-----------|-----------|---------|-------------------|--------|
| Chr2   | 4081262   | 4081331   | Tu2    | 5854113   | 5854181   | G1 G2   | match             | pair1  |
| Chr2   | 30263145  | 30263479  | Tu2    | 29920319  | 29920639  | G1 G2   | match             | pair2  |
| Chr2   | 52046750  | 52046883  | Tu2    | 45579512  | 45579643  | H       | match             | pair3  |
| Chr2   | 74158600  | 74158914  | Tu2    | 67784015  | 67785007  | G1 G2   | match             | pair4  |
| Chr2   | 75211175  | 75211301  | Tu2    | 68485323  | 68485447  | H       | match             | pair5  |
| Chr2   | 506421129 | 506421186 | Tu2    | 631557463 | 631557518 | H       | match             | pair6  |
| Chr2   | 546412191 | 546412238 | Tu2    | 667713487 | 667713532 | H       | match             | pair7  |
| Chr2   | 559510166 | 559510721 | Tu2    | 677566210 | 677566761 | I       | match             | pair8  |
| Chr2   | 588960618 | 588961886 | Tu2    | 713427396 | 713428374 | J       | match             | pair9  |
| Chr3   | 374870371 | 374872997 | Tu3    | 488565520 | 488567696 | J       | match             | pair10 |
| Chr3   | 396392710 | 396392948 | Tu3    | 511130697 | 511130934 | I       | match             | pair11 |
| Chr3   | 467917911 | 467918516 | Tu3    | 593690522 | 593691126 | I       | match             | pair12 |
| Chr3   | 536297000 | 536299000 | Tu3    | 651100682 | 651102829 | G1 G2   | match             | pair13 |
| Chr3   | 618098378 | 618100436 | Tu3    | 734062498 | 734064366 | I       | match             | pair14 |
| Chr3   | 625165404 | 625165730 | Tu3    | 743197205 | 743197529 | G1 G2   | match             | pair15 |
| Chr4   | 517221028 | 517221122 | Tu5    | 651762614 | 651762704 | I       | match             | pair16 |
| Chr5   | 556183988 | 556184086 | Tu4    | 604288955 | 604289052 | all     | match             | pair17 |
| Chr5   | 561442633 | 561443226 | Tu4    | 607815658 | 607816345 | G1      | match             | pair18 |
| Chr6   | 29626000  | 29628000  | Tu6    | 28046771  | 28048534  | G2      | match             | pair19 |
| Chr6   | 390328742 | 390328999 | Tu6    | 475223901 | 475224157 | H       | match             | pair20 |
| Chr6   | 478071000 | 478073000 | Tu6    | 557158220 | 557160221 | G1 G2   | match             | pair21 |
| Chr6   | 479733727 | 479734020 | Tu6    | 559593480 | 559593770 | G2      | match             | pair22 |
| Chr7   | 583312765 | 583312819 | Tu7    | 651742736 | 651742789 | H       | match             | pair23 |
| Chr2   | 643692861 | 643693035 | Tu2    | 744609000 | 744619000 | I       | no match          | pair24 |
| Chr3   | 449708292 | 449711421 | Tu3    | 575953875 | 575962554 | I       | low res.          | pair25 |
| Chr4   | 493497185 | 493497257 | Tu5    | 623025000 | 623028000 | I       | no match          | pair26 |
| Chr2   | 39105736  | 39116042  | Tu2    | 39705000  | 39708000  | H       | low res.          | pair27 |
| Chr4   | 57905217  | 57905279  | Tu4    | 62579600  | 62582000  | G1 G2   | no match          | pair28 |
| Chr7   | 569559483 | 569567346 | Tu7    | 643189000 | 643207000 | J       | shift(12.7Mb)     | pair29 |
| Chr2   | 639513469 | 639514631 | Tu2    | 737648000 | 737652000 | G1 G2   | no match          | pair30 |
| Chr6   | 487078755 | 487079082 | Tu6    | 569561000 | 569606000 | G1      | shift (387kb)     | pair31 |
| Chr3   | 555267182 | 555267373 | Tu3    | 670210000 | 670212000 | G1 G2   | shift (427kb)     | pair32 |
| Chr2   | 552663041 | 552663113 | Tu2    | 672383000 | 672385000 | H       | no match          | pair33 |
| Chr3   | 436186321 | 436186399 | Tu3    | 561990000 | 561993000 | I       | shift (49Mb)      | pair34 |
| Chr4   | 5910000   | 5914000   | Tu4    | 8834000   | 8838000   | H       | shift (77kb)      | pair35 |
| Chr2   | 594996015 | 594996114 | Tu2    | 707387000 | 707417000 | J       | shift (94Mb)      | pair36 |
| Chr3   | 4490649   | 4490701   | Tu3    | 5453000   | 5471113   | I       | no match.         | pair37 |

<sup>1</sup> indicates the match types of HE junctions between A and D subgenome. match: HE junction pairs were well aligned; shift: HE junctions from D subgenome were not aligned to those from A subgenome but in the same chromosome, content in brackets represent the genomic distance between the alignment hit and HE junction of in A subgenome; no match: HE

junctions from D subgenome were not aligned to A subgenome; low res.: HE junction with low resolution and not used for alignment.

Table S2. Number of HE junctions in different homoeologous groups in AADD tetraploids

|           | Total HE junctions | Well-aligned HE junctions |
|-----------|--------------------|---------------------------|
| Group 1   | 0                  | 0                         |
| Group 2   | 14                 | 9                         |
| Group 3   | 10                 | 6                         |
| Group 4   | 2                  | 0                         |
| Group 5   | 0                  | 0                         |
| Group 6   | 5                  | 4                         |
| Group 7   | 2                  | 1                         |
| 4A and 5D | 2                  | 1                         |
| 5A and 4D | 2                  | 2                         |
| All       | 37                 | 23                        |

Table S3. Primer sequences for validating full-length fusion transcripts by Sanger sequencing

| Primers          | Sequences                  |
|------------------|----------------------------|
| AET5Gv21168400-F | CACTCCGTGAGGAACCG          |
| AET5Gv21168400-R | GAGGATTTGCCATCTGTGA        |
| AET2Gv20016200-F | CAGGATGGGGATTCAAGA         |
| AET2Gv20016200-R | ACTGTAACAGATTCAAGGCACT     |
| AET2Gv20252700-F | CGCTCTACCTGCTCTTCG         |
| AET2Gv20252700-R | CAGATACGCCGCTTCAGT         |
| AET6Gv20704700-F | GGCCACCATCCTGGAGAACAT      |
| AET6Gv20704700-R | GCTCTGGGTGTAGGCCGAAGTGC    |
| AET2Gv21000600-F | GGGCGATGCGGGTGAAA          |
| AET2Gv21000600-R | TCAAGGTAGTGCTGGTAGATGTAGGA |
| AET3Gv20796600-F | CCGACGATCTACGCCTTCT        |
| AET3Gv20796600-R | CCCTCGCAGCAACACTCTA        |
| AET3Gv20936700-F | ATGCGGCCATGAGTTTG          |
| AET3Gv20936700-R | CTCCCTCTAGTTCGCTTCG        |
| AET4Gv20852900-F | GTCCTCATCTTCCCCTTCTTCG     |
| AET4Gv20852900-R | AGTTCTTCTTGGCTCTTGCTTCC    |

Table S4. Chromosome positions of 104 HE junctions in eight *Brassica napus* accessions (based on the position in C genome of *B. oleracea* and A genome of *B. rapa*).

| Chr. C | Start C  | End C    | Chr. A         | Start A  | End A    | Samples                   | Type <sup>1</sup> |
|--------|----------|----------|----------------|----------|----------|---------------------------|-------------------|
| C1     | 3990388  | 3991188  | A01            | 2977924  | 2978111  | Kale                      | match             |
| C1     | 11735922 | 11737262 | A01            | 7858737  | 7859586  | Kale                      | match             |
| C1     | 11865844 | 11866094 | A01            | 7960324  | 7960579  | Kale                      | match             |
| C1     | 14151827 | 14152506 | A01            | 10002456 | 10003132 | H165                      | match             |
| C1     | 15287827 | 15288219 | A01            | 10741934 | 10742323 | H165                      | match             |
| C1     | 15853350 | 15853654 | A01            | 11095573 | 11095878 | Aviso, Bristol            | match             |
| C1     | 16121876 | 16122339 | A01            | 11324456 | 11324918 | Aviso, Bristol            | match             |
| C1     | 34309991 | 34310187 | A01            | 21441244 | 21441437 | H165                      | match             |
| C1     | 34409828 | 34410006 | A01            | 21530833 | 21531013 | Kale                      | match             |
| C1     | 35772368 | 35772440 | A01            | 22840197 | 22840467 | Swede                     | match             |
| C1     | 37350795 | 37351421 | A01            | 23795409 | 23796028 | Aviso, Bristol            | match             |
| C1     | 39617623 | 39618660 | Scaffold000164 | 42911    | 43947    | Bristol                   | other_chr         |
| C1     | 39966798 | 39969099 | A01            | 26526111 | 26528203 | Darmor                    | match             |
| C1     | 40849674 | 40849952 | A01            | 27396486 | 27396777 | Darmor                    | match             |
| C1     | 41061550 | 41061721 | A01            | 27559695 | 27559865 | Darmor                    | match             |
| C1     | 41321910 | 41322147 | A01            | 27714087 | 27714320 | Darmor                    | shift (3kb)       |
| C1     | 41749893 | 41752893 | A01            | 28002805 | 28005720 | Yudal                     | match             |
| C1     | 42406658 | 42409707 | Scaffold000229 | 48896    | 51211    | Aviso, Bristol            | other_chr         |
| C1     | 42406658 | 42407785 | Scaffold000229 | 50818    | 51211    | Swede                     | other_chr         |
| C1     | 43065473 | 43066124 | A01            | 25557481 | 25558127 | Swede                     | match             |
| C2     | 494539   | 495291   | A02            | 1700901  | 1701616  | H165                      | match             |
| C2     | 2414523  | 2417669  | A02            | 2817850  | 2820774  | Yudal                     | match             |
| C2     | 3492502  | 3493594  | A02            | 3612871  | 3613053  | Aburamasari               | match             |
| C2     | 6765978  | 6766015  | A02            | 5606300  | 5606417  | Darmor                    | match             |
| C2     | 7698382  | 7698643  | A02            | 6055332  | 6055592  | Darmor                    | match             |
| C2     | 7831687  | 7831943  | A02            | 6149124  | 6149379  | H165                      | match             |
| C2     | 10349704 | 10351053 | A02            | 7379461  | 7380768  | Aburamasari, swede, Yudal | match             |
| C2     | 11408303 | 11408364 | A02            | 7837983  | 7838043  | Aburamasari, swede, Yudal | match             |
| C2     | 22734221 | 22734342 | A02            | 13377573 | 13377691 | Swede                     | match             |
| C2     | 23048525 | 23049745 | A02            | 13554306 | 13555525 | Darmor                    | shift (6kb)       |
| C2     | 24597326 | 24597479 | A02            | 14332176 | 14332306 | Swede                     | match             |
| C2     | 38035924 | 38037924 | A08            | 14565897 | 14569316 | H165                      | other_chr         |
| C2     | 39469355 | 39469526 | A02            | 18187047 | 18187225 | Kale                      | match             |
| C2     | 41046507 | 41047022 | A02            | 19229213 | 19229718 | Kale                      | match             |
| C2     | 42209256 | 42214691 | A02            | 21071121 | 21073404 | H165                      | match             |
| C2     | 50793193 | 50794281 | A02            | 25881931 | 25883040 | Darmor                    | match             |
| C2     | 51312311 | 51312407 | A02            | 26296470 | 26296560 | Darmor                    | match             |
| C2     | 51417726 | 51419235 | Scaffold000490 | 5076     | 6337     | Swede                     | other_chr         |
| C2     | 51441401 | 51442250 | A02            | 26401130 | 26401979 | Aburamasari, Yudal        | match             |
| C2     | 51799087 | 51799605 | A02            | 26567316 | 26567863 | Aburamasari               | match             |
| C2     | 52795396 | 52796544 | A02            | 27502393 | 27503540 | Swede                     | match             |

|    |          |          |     |          |          |                    |           |
|----|----------|----------|-----|----------|----------|--------------------|-----------|
| C3 | 2006236  | 2008479  | A03 | 1672744  | 1673744  | Aburamasari        | match     |
| C3 | 2317136  | 2322567  | A03 | 1865672  | 1867972  | Aburamasari, Yudal | match     |
| C3 | 4874207  | 4883188  | A03 | 3880693  | 3888275  | Swede              | match     |
| C3 | 5851394  | 5851524  | A03 | 4682354  | 4682487  | Aviso, Bristol     | match     |
| C3 | 6247040  | 6247245  | A03 | 4911997  | 4912159  | H165               | match     |
| C3 | 6367698  | 6367904  | A03 | 5017476  | 5017680  | Aviso              | match     |
| C3 | 6432816  | 6434256  | A03 | 5068737  | 5070176  | H165               | match     |
| C3 | 6725055  | 6727720  | A03 | 5317319  | 5319125  | Bristol            | match     |
| C3 | 6924496  | 6924906  | A03 | 5447284  | 5447687  | Bristol            | match     |
| C4 | 332560   | 334644   | A05 | 244419   | 246516   | Kale               | match     |
| C4 | 48097092 | 48097164 | A04 | 15032101 | 15032172 | Darmor             | match     |
| C4 | 48671789 | 48672442 | A04 | 15394477 | 15395129 | Darmor             | match     |
| C4 | 49060310 | 49060983 | A04 | 15648440 | 15649120 | Darmor             | match     |
| C4 | 49690619 | 49691040 | A04 | 16087023 | 16087443 | Darmor             | match     |
| C4 | 49744132 | 49744747 | A04 | 16121435 | 16122058 | Swede              | match     |
| C4 | 50961650 | 50961766 | A04 | 17103791 | 17103906 | Kale               | match     |
| C5 | 40730725 | 40731829 | A05 | 20650702 | 20651411 | Bristol            | match     |
| C5 | 41155931 | 41156036 | A05 | 20934550 | 20934654 | Bristol            | match     |
| C5 | 41830248 | 41830334 | A05 | 21373620 | 21373882 | Kale               | match     |
| C5 | 42014855 | 42015091 | A05 | 21504892 | 21505111 | Kale               | match     |
| C5 | 42718082 | 42718260 | A05 | 21964626 | 21964802 | Kale               | match     |
| C5 | 42883620 | 42892863 | A05 | 22068769 | 22078022 | Yudal, Aburamasari | match     |
| C5 | 43079621 | 43079870 | A05 | 22213585 | 22213833 | Aburamasari, Yudal | match     |
| C5 | 44628034 | 44628532 | A02 | 23231824 | 23232375 | Aviso, Bristol     | other_chr |
| C5 | 45313958 | 45314187 | A05 | 23467203 | 23467419 | Swede              | match     |
| C5 | 46030229 | 46032365 | A02 | 26802762 | 26804822 | Swede              | other_chr |
| C5 | 46416349 | 46416426 | A05 | 23623171 | 23623446 | Yudal              | match     |
| C6 | 38384984 | 38385261 | A07 | 21359722 | 21359998 | Yudal              | match     |
| C6 | 38483157 | 38483535 | A07 | 21452115 | 21452484 | Yudal              | match     |
| C8 | 35753612 | 35756743 | A09 | 32062424 | 32062911 | H165               | match     |
| C8 | 35853527 | 35854117 | A09 | 32171396 | 32171965 | H165               | match     |
| C8 | 37493119 | 37497467 | A09 | 33644447 | 33647886 | H165               | match     |
| C8 | 38028713 | 38029713 | A09 | 34119912 | 34120709 | Bristol            | match     |
| C8 | 38429460 | 38431592 | A09 | 34453620 | 34454711 | Swede              | match     |
| C8 | 39529544 | 39529661 | A09 | 35237812 | 35237928 | Bristol            | match     |
| C8 | 40140326 | 40140458 | A09 | 35725845 | 35725976 | Aviso, Bristol     | match     |
| C8 | 40558577 | 40558852 | A09 | 36150008 | 36150282 | H165               | match     |
| C8 | 40796260 | 40796808 | A09 | 36360984 | 36361401 | Aviso, Bristol     | match     |
| C8 | 41227220 | 41229135 | A09 | 36732348 | 36734330 | Aburamasari        | match     |
| C8 | 41448018 | 41448156 | A09 | 36914218 | 36914355 | Darmor             | match     |
| C9 | 141476   | 141594   | A09 | 1037680  | 1037803  | Darmor             | match     |
| C9 | 300095   | 300568   | A09 | 901176   | 901509   | Kale               | match     |
| C9 | 593138   | 593365   | A09 | 629747   | 629974   | Aviso, Bristol     | match     |
| C9 | 908000   | 918000   | A09 | 397099   | 403042   | swede, Yudal       | match     |

|    |          |          |     |          |          |                |       |
|----|----------|----------|-----|----------|----------|----------------|-------|
| C9 | 1080870  | 1086136  | A09 | 240441   | 242307   | Yudal          | match |
| C9 | 1085741  | 1085938  | A09 | 240637   | 240833   | Swede          | match |
| C9 | 1087374  | 1087558  | A09 | 238966   | 239153   | H165           | match |
| C9 | 2043382  | 2043448  | A09 | 1332047  | 1332112  | Yudal          | match |
| C9 | 2045144  | 2045228  | A09 | 1333816  | 1333899  | Aburamasari    | match |
| C9 | 2870455  | 2870526  | A09 | 2589483  | 2589553  | Swede          | match |
| C9 | 3014517  | 3014760  | A09 | 2698977  | 2699219  | Aburamasari    | match |
| C9 | 3360366  | 3360818  | A09 | 1869180  | 1869618  | Yudal          | match |
| C9 | 3361156  | 3362184  | A09 | 1867829  | 1868824  | Aburamasari    | match |
| C9 | 4315421  | 4315568  | A09 | 2767361  | 2767507  | Yudal          | match |
| C9 | 4502543  | 4503520  | A09 | 2919760  | 2920408  | Yudal          | match |
| C9 | 6659489  | 6660191  | A09 | 4175893  | 4176566  | Swede          | match |
| C9 | 8684926  | 8685180  | A09 | 5319971  | 5320224  | Darmor         | match |
| C9 | 8857111  | 8857268  | A09 | 5431010  | 5431189  | Darmor         | match |
| C9 | 9895116  | 9895692  | A09 | 7325629  | 7326202  | Aviso, Bristol | match |
| C9 | 10292737 | 10292876 | A09 | 7089358  | 7089494  | Aviso, Bristol | match |
| C9 | 50989130 | 50989210 | A10 | 15026481 | 15026556 | Swede          | match |
| C9 | 51295644 | 51295847 | A10 | 16468542 | 16468744 | Swede          | match |
| C9 | 54391835 | 54391968 | A10 | 17410729 | 17410860 | H165           | match |

---

Table S5. Chromosome positions of 21 HE junctions in three banana triploid accessions (based on the position in B genome of *M. balbisiana* and A genome of *M. acuminata*).

| Chr. B | Start B  | End B    | Chr. A | Start A  | End A    | Samples       | Type <sup>1</sup> |
|--------|----------|----------|--------|----------|----------|---------------|-------------------|
| Bchr04 | 6587091  | 6587327  | chr04  | 6146789  | 6147023  | FenJiao       | match             |
| Bchr04 | 37744538 | 37747294 | chr04  | 32298270 | 32299199 | FenJiao       | match             |
| Bchr04 | 40041836 | 40041924 | chr04  | 34572494 | 34572581 | FenJiao       | match             |
| Bchr05 | 37337424 | 37337574 | chr05  | 36930151 | 36930295 | Kamaramasenge | match             |
| Bchr06 | 448664   | 449081   | chr06  | 446637   | 447053   | Pelipita      | match             |
| Bchr06 | 37939967 | 37940074 | chr06  | 34352094 | 34352195 | FenJiao       | match             |
| Bchr06 | 38491637 | 38492463 | chr06  | 34869521 | 34870340 | Pelipita      | match             |
| Bchr07 | 32999005 | 32999152 | chr07  | 31552034 | 31552163 | Pelipita      | match             |
| Bchr07 | 34657417 | 34657703 | chr07  | 32977979 | 32978265 | FenJiao       | match             |
| Bchr07 | 36326380 | 36326480 | chr07  | 34528141 | 34528384 | Pelipita      | match             |
| Bchr09 | 654679   | 654882   | chr09  | 552362   | 552565   | Pelipita      | match             |
| Bchr09 | 3307561  | 3307693  | chr09  | 3114861  | 3114991  | Kamaramasenge | match             |
| Bchr09 | 4771870  | 4772168  | chr09  | 4639024  | 4639321  | Kamaramasenge | match             |
| Bchr09 | 35336812 | 35337797 | chr09  | 39158712 | 39159668 | FenJiao       | match             |
| Bchr10 | 29235499 | 29235909 | chr10  | 25413320 | 25413728 | FenJiao       | match             |
| Bchr10 | 29930687 | 29930969 | chr10  | 26072695 | 26072976 | Kamaramasenge | match             |
| Bchr10 | 31285433 | 31285778 | chr10  | 27435983 | 27436327 | Kamaramasenge | match             |
| Bchr10 | 34815076 | 34815232 | chr10  | 30812846 | 30813001 | Pelipita      | match             |
| Bchr10 | 38388494 | 38388667 | chr10  | 34238777 | 34238949 | Kamaramasenge | match             |
| Bchr11 | 2523247  | 2523323  | chr11  | 2223384  | 2223459  | Kamaramasenge | match             |
| Bchr11 | 3492859  | 3493619  | chr11  | 3110017  | 3110517  | FenJiao       | match             |



Table S6. Chromosome positions of 166 HE junctions in four synthetic rice tetraploid individuals (based on the position in genome of Nipponbare and 9311).

| Chr. Nip | Start Nip | End Nip  | Chr. 9311  | Start 9311 | End 9311 | Samples        | Type <sup>1</sup> |
|----------|-----------|----------|------------|------------|----------|----------------|-------------------|
| Chr1     | 1129918   | 1130735  | 9311_chr01 | 1184035    | 1184831  | 99NN-3, 99NN-7 | match             |
| Chr1     | 4157344   | 4157685  | 9311_chr01 | 4353397    | 4353736  | NN99-4, NN99-8 | match             |
| Chr1     | 4985027   | 4985872  | 9311_chr01 | 5108472    | 5109321  | NN99-8         | match             |
| Chr1     | 5536090   | 5536438  | 9311_chr01 | 5670451    | 5670798  | NN99-8         | match             |
| Chr1     | 5684479   | 5684930  | 9311_chr01 | 5825188    | 5825638  | NN99-8         | match             |
| Chr1     | 6102367   | 6109226  | 9311_chr01 | 6291653    | 6298511  | NN99-4         | match             |
| Chr1     | 8332955   | 8333710  | 9311_chr01 | 8809221    | 8809975  | NN99-4, NN99-8 | match             |
| Chr1     | 10636446  | 10637172 | 9311_chr01 | 11272652   | 11273337 | 99NN-3, 99NN-7 | match             |
| Chr1     | 14590366  | 14590889 | 9311_chr01 | 15554627   | 15555148 | 99NN-3, 99NN-7 | match             |
| Chr1     | 19986079  | 19986411 | 9311_chr01 | 21398260   | 21398592 | NN99-4, NN99-8 | match             |
| Chr1     | 21203888  | 21204092 | 9311_chr01 | 22665214   | 22665417 | 99NN-3, 99NN-7 | match             |
| Chr1     | 23717497  | 23717750 | 9311_chr01 | 25599562   | 25599814 | NN99-8         | match             |
| Chr1     | 30408738  | 30408947 | 9311_chr01 | 32855527   | 32855737 | NN99-8         | match             |
| Chr1     | 32806839  | 32806983 | 9311_chr01 | 35290081   | 35290224 | NN99-4         | match             |
| Chr1     | 35054686  | 35055822 | 9311_chr01 | 37642338   | 37643472 | NN99-4, NN99-8 | match             |
| Chr1     | 36466146  | 36466229 | 9311_chr01 | 39053787   | 39053869 | 99NN-3, 99NN-7 | match             |
| Chr1     | 37636457  | 37636760 | 9311_chr01 | 40166663   | 40166965 | 99NN-3, 99NN-7 | match             |
| Chr1     | 40595040  | 40596220 | 9311_chr01 | 43331519   | 43332693 | 99NN-3, 99NN-7 | match             |
| Chr1     | 40822811  | 40822992 | 9311_chr01 | 43620665   | 43620843 | 99NN-3, 99NN-7 | match             |
| Chr1     | 42024667  | 42033150 | 9311_chr01 | 44896269   | 44903327 | 99NN-3, 99NN-7 | match             |
| Chr10    | 2357528   | 2357794  | 9311_chr10 | 2433505    | 2433770  | 99NN-7         | match             |
| Chr10    | 9919537   | 9920695  | 9311_chr10 | 9719676    | 9720818  | 99NN-7         | match             |
| Chr10    | 11006519  | 11008450 | 9311_chr10 | 10799253   | 10801183 | 99NN-3, 99NN-7 | match             |
| Chr10    | 14940844  | 14941607 | 9311_chr10 | 15439859   | 15440620 | NN99-4, NN99-8 | match             |
| Chr11    | 1224893   | 1225023  | 9311_chr11 | 1311212    | 1311341  | NN99-4, NN99-8 | match             |
| Chr11    | 1458320   | 1459347  | 9311_chr11 | 1563533    | 1564559  | 99NN-7         | match             |
| Chr11    | 3354848   | 3355306  | 9311_chr11 | 3615392    | 3615850  | NN99-4, NN99-8 | match             |
| Chr11    | 6505875   | 6506847  | 9311_chr11 | 6764486    | 6765358  | 99NN-3         | match             |
| Chr11    | 8989586   | 8990682  | 9311_chr11 | 8803805    | 8804892  | 99NN-3, 99NN-7 | match             |
| Chr11    | 15562005  | 15562218 | 9311_chr11 | 15894881   | 15895093 | NN99-4         | match             |
| Chr11    | 16453477  | 16454189 | 9311_chr11 | 16976700   | 16977412 | NN99-4         | match             |
| Chr11    | 17387697  | 17388993 | 9311_chr11 | 18070010   | 18071305 | NN99-4, NN99-8 | match             |
| Chr11    | 25277115  | 25278035 | 9311_chr11 | 26875583   | 26876499 | 99NN-3, 99NN-7 | match             |
| Chr11    | 26432840  | 26433995 | 9311_chr11 | 27929386   | 27930533 | 99NN-3, 99NN-7 | match             |
| Chr12    | 1032308   | 1034434  | 9311_chr12 | 1021608    | 1023736  | 99NN-3, 99NN-7 | match             |
| Chr12    | 1437869   | 1437925  | 9311_chr12 | 1454193    | 1454248  | 99NN-3, 99NN-7 | match             |
| Chr12    | 2304970   | 2305577  | 9311_chr12 | 2268447    | 2269037  | NN99-4, NN99-8 | match             |
| Chr12    | 4760928   | 4761191  | 9311_chr12 | 4714751    | 4715012  | 99NN-3, 99NN-7 | match             |
| Chr12    | 18101987  | 18102657 | 9311_chr12 | 17023965   | 17024636 | NN99-4         | match             |
| Chr12    | 20781709  | 20781877 | 9311_chr12 | 19238131   | 19238298 | 99NN-3         | match             |
| Chr12    | 23920185  | 23920710 | 9311_chr12 | 22333373   | 22333894 | NN99-8         | match             |

|       |          |          |            |          |          |                |           |
|-------|----------|----------|------------|----------|----------|----------------|-----------|
| Chr12 | 24184905 | 24185658 | 9311_chr12 | 22588876 | 22589592 | 99NN-3, 99NN-7 | match     |
| Chr2  | 913255   | 914179   | 9311_chr02 | 944414   | 945336   | 99NN-7         | match     |
| Chr2  | 983271   | 985248   | 9311_chr02 | 1018721  | 1020700  | 99NN-3         | match     |
| Chr2  | 2878228  | 2884337  | 9311_chr02 | 3115332  | 3121447  | 99NN-3, 99NN-7 | match     |
| Chr2  | 3760348  | 3761354  | 9311_chr02 | 4018044  | 4019050  | 99NN-3, 99NN-7 | match     |
| Chr2  | 4367221  | 4368114  | 9311_chr02 | 4715322  | 4716217  | 99NN-3, 99NN-7 | match     |
| Chr2  | 5862539  | 5863144  | 9311_chr02 | 6429265  | 6429868  | 99NN-3, 99NN-7 | match     |
| Chr2  | 7422756  | 7423008  | 9311_chr02 | 8012608  | 8012859  | 99NN-3         | match     |
| Chr2  | 9100300  | 9101456  | 9311_chr02 | 9802304  | 9804123  | NN99-4, NN99-8 | match     |
| Chr2  | 9885768  | 9887894  | 9311_chr02 | 10422434 | 10424560 | 99NN-7         | match     |
| Chr2  | 10123621 | 10124329 | 9311_chr02 | 10673088 | 10673795 | 99NN-7         | match     |
| Chr2  | 10323633 | 10324031 | 9311_chr02 | 10854561 | 10854957 | NN99-4, NN99-8 | match     |
| Chr2  | 11687200 | 11687495 | 9311_chr02 | 12306927 | 12307221 | NN99-4         | match     |
| Chr2  | 12218696 | 12219554 | 9311_chr02 | 12766873 | 12767730 | NN99-8         | match     |
| Chr2  | 18815954 | 18816533 | 9311_chr02 | 19304579 | 19305157 | 99NN-3         | match     |
| Chr2  | 21380695 | 21384471 | 9311_chr02 | 21958751 | 21962526 | 99NN-3, 99NN-7 | match     |
| Chr2  | 23122982 | 23123294 | 9311_chr02 | 23685187 | 23685498 | NN99-4         | match     |
| Chr2  | 24013723 | 24015938 | 9311_chr02 | 24582986 | 24585195 | NN99-4, NN99-8 | match     |
| Chr2  | 24196299 | 24196512 | 9311_chr02 | 24759135 | 24759347 | NN99-8         | match     |
| Chr2  | 25445009 | 25446106 | 9311_chr02 | 25960455 | 25961543 | NN99-8         | match     |
| Chr2  | 34368907 | 34369522 | 9311_chr02 | 34805513 | 34806126 | 99NN-3, 99NN-7 | match     |
| Chr2  | 35137218 | 35139423 | 9311_chr02 | 35625106 | 35627309 | NN99-4, NN99-8 | match     |
| Chr2  | 35418413 | 35420009 | 9311_chr02 | 35929576 | 35931191 | 99NN-3, 99NN-7 | match     |
| Chr2  | 35676588 | 35677386 | 9311_chr01 | 423747   | 424522   | 99NN-7         | other_chr |
| Chr3  | 386243   | 388586   | 9311_chr03 | 449557   | 450974   | 99NN-3, 99NN-7 | match     |
| Chr3  | 3237650  | 3238887  | 9311_chr03 | 3344116  | 3345722  | NN99-4, NN99-8 | match     |
| Chr3  | 3398773  | 3398880  | 9311_chr03 | 3517353  | 3517459  | 99NN-3, 99NN-7 | match     |
| Chr3  | 3730513  | 3731195  | 9311_chr03 | 3849500  | 3850181  | NN99-4, NN99-8 | match     |
| Chr3  | 4235630  | 4236121  | 9311_chr03 | 4325267  | 4325758  | 99NN-3, 99NN-7 | match     |
| Chr3  | 6455291  | 6455554  | 9311_chr03 | 6600626  | 6600888  | 99NN-3, 99NN-7 | match     |
| Chr3  | 8344310  | 8345575  | 9311_chr03 | 8521968  | 8523233  | NN99-4, NN99-8 | match     |
| Chr3  | 9425774  | 9425896  | 9311_chr03 | 9713531  | 9713652  | NN99-4, NN99-8 | match     |
| Chr3  | 10358060 | 10359106 | 9311_chr03 | 10825823 | 10826846 | NN99-4         | match     |
| Chr3  | 12417425 | 12418116 | 9311_chr03 | 13329537 | 13330218 | NN99-4, NN99-8 | match     |
| Chr3  | 13765767 | 13767021 | 9311_chr03 | 13768839 | 13769747 | 99NN-3, 99NN-7 | match     |
| Chr3  | 15792029 | 15792138 | 9311_chr03 | 17059628 | 17059736 | NN99-4, NN99-8 | match     |
| Chr3  | 16731513 | 16732914 | 9311_chr03 | 18213603 | 18215003 | 99NN-3, 99NN-7 | match     |
| Chr3  | 24300330 | 24300822 | 9311_chr03 | 27056630 | 27057121 | 99NN-3, 99NN-7 | match     |
| Chr3  | 27618636 | 27624348 | 9311_chr03 | 30587227 | 30590573 | NN99-8         | match     |
| Chr3  | 27838445 | 27838835 | 9311_chr03 | 30792106 | 30792495 | NN99-4         | match     |
| Chr3  | 31749168 | 31750285 | 9311_chr03 | 34957957 | 34959073 | NN99-4, NN99-8 | match     |
| Chr3  | 32617863 | 32619300 | 9311_chr03 | 35821512 | 35822935 | NN99-4, NN99-8 | match     |
| Chr3  | 33805640 | 33806078 | 9311_chr03 | 37179699 | 37180136 | 99NN-3, 99NN-7 | match     |
| Chr3  | 36064725 | 36064887 | 9311_chr03 | 39508442 | 39508603 | NN99-4, NN99-8 | match     |

|      |          |          |            |          |          |                |           |
|------|----------|----------|------------|----------|----------|----------------|-----------|
| Chr4 | 1795488  | 1795507  | 9311_chr04 | 2268764  | 2269081  | NN99-4         | match     |
| Chr4 | 4526487  | 4526609  | 9311_chr04 | 3849208  | 3849329  | 99NN-7         | match     |
| Chr4 | 5210661  | 5211364  | 9311_chr04 | 4579387  | 4580091  | NN99-8         | match     |
| Chr4 | 5608200  | 5608648  | 9311_chr04 | 4952638  | 4953076  | 99NN-3         | match     |
| Chr4 | 6692414  | 6692909  | 9311_chr04 | 6031861  | 6032355  | 99NN-7         | match     |
| Chr4 | 7621177  | 7628603  | 9311_chr04 | 6847456  | 6848963  | 99NN-3         | match     |
| Chr4 | 14156258 | 14156420 | 9311_chr04 | 13343773 | 13343934 | 99NN-3         | match     |
| Chr4 | 19991419 | 19992451 | 9311_chr04 | 19475440 | 19476470 | 99NN-3, 99NN-7 | match     |
| Chr4 | 23024048 | 23030179 | 9311_chr04 | 22968677 | 22974808 | NN99-8         | match     |
| Chr4 | 23077402 | 23082258 | 9311_chr04 | 23022044 | 23026900 | 99NN-3         | match     |
| Chr4 | 26790491 | 26796353 | 9311_chr04 | 27285169 | 27291029 | 99NN-3         | match     |
| Chr4 | 27131669 | 27132284 | 9311_chr04 | 27643140 | 27643754 | 99NN-7         | match     |
| Chr4 | 27285452 | 27286191 | 9311_chr04 | 27824211 | 27824950 | NN99-8         | match     |
| Chr4 | 27948627 | 27949076 | 9311_chr04 | 28516860 | 28517308 | NN99-4, NN99-8 | match     |
| Chr4 | 28201453 | 28202465 | 9311_chr04 | 28757241 | 28758248 | 99NN-3         | match     |
| Chr4 | 30281846 | 30282502 | 9311_chr04 | 30965072 | 30965728 | 99NN-3         | match     |
| Chr4 | 34230146 | 34239322 | 9311_chr04 | 35223316 | 35232493 | 99NN-3, 99NN-7 | match     |
| Chr5 | 758518   | 759097   | 9311_chr05 | 777958   | 778531   | 99NN-7         | match     |
| Chr5 | 1120146  | 1121800  | 9311_chr05 | 1196244  | 1197860  | 99NN-3, 99NN-7 | match     |
| Chr5 | 2608352  | 2609415  | 9311_chr05 | 2810677  | 2811737  | NN99-8         | match     |
| Chr5 | 3511584  | 3512136  | 9311_chr05 | 3646067  | 3646618  | NN99-4         | match     |
| Chr5 | 4830718  | 4831000  | 9311_chr05 | 4911035  | 4911323  | NN99-4         | match     |
| Chr5 | 5376361  | 5376786  | 9311_chr05 | 5497807  | 5498232  | 99NN-3, 99NN-7 | match     |
| Chr5 | 6397229  | 6397914  | 9311_chr05 | 6462184  | 6462835  | NN99-4         | match     |
| Chr5 | 7927370  | 7927740  | 9311_chr05 | 8189957  | 8190326  | 99NN-3         | match     |
| Chr5 | 7944527  | 7944600  | 9311_chr05 | 8206516  | 8206688  | NN99-4, NN99-8 | match     |
| Chr5 | 14734313 | 14734449 | 9311_chr05 | 14980352 | 14980487 | 99NN-7         | match     |
| Chr5 | 16168675 | 16169578 | 9311_chr05 | 16285485 | 16286381 | 99NN-7         | match     |
| Chr5 | 17317984 | 17318960 | 9311_chr05 | 17603786 | 17604763 | NN99-4         | match     |
| Chr5 | 18185538 | 18186274 | 9311_chr05 | 18592228 | 18592963 | 99NN-7         | match     |
| Chr5 | 20441630 | 20441687 | 9311_chr05 | 20972731 | 20972787 | NN99-4, NN99-8 | match     |
| Chr5 | 21096330 | 21096333 | 9311_chr03 | 33155295 | 33155353 | 99NN-3         | other_chr |
| Chr5 | 21550499 | 21553231 | 9311_chr05 | 22216186 | 22217353 | 99NN-7         | match     |
| Chr5 | 26951405 | 26951791 | 9311_chr05 | 27655586 | 27655971 | NN99-4, NN99-8 | match     |
| Chr5 | 27897316 | 27898009 | 9311_chr05 | 28509997 | 28510691 | NN99-4, NN99-8 | match     |
| Chr6 | 297212   | 299550   | 9311_chr06 | 227091   | 229427   | 99NN-3, 99NN-7 | match     |
| Chr6 | 5536745  | 5541462  | 9311_chr06 | 5667184  | 5669712  | NN99-4, NN99-8 | match     |
| Chr6 | 7421037  | 7421905  | 9311_chr06 | 7739798  | 7740665  | NN99-4, NN99-8 | match     |
| Chr6 | 9676469  | 9676562  | 9311_chr06 | 9865994  | 9866086  | 99NN-3, 99NN-7 | match     |
| Chr6 | 10922005 | 10926880 | 9311_chr06 | 10963059 | 10967934 | 99NN-3, 99NN-7 | match     |
| Chr6 | 21210749 | 21210860 | 9311_chr06 | 21241968 | 21242078 | NN99-4         | match     |
| Chr6 | 21398092 | 21399255 | 9311_chr06 | 21424364 | 21425526 | NN99-4         | match     |
| Chr6 | 24031147 | 24031513 | 9311_chr06 | 24084373 | 24084738 | NN99-4         | match     |
| Chr6 | 24233617 | 24235823 | 9311_chr06 | 24279539 | 24281744 | NN99-4         | match     |

|      |          |          |            |          |          |                |       |
|------|----------|----------|------------|----------|----------|----------------|-------|
| Chr6 | 27159932 | 27168661 | 9311_chr06 | 27621283 | 27628557 | NN99-4, NN99-8 | match |
| Chr6 | 28341054 | 28341271 | 9311_chr06 | 28884301 | 28884509 | NN99-4, NN99-8 | match |
| Chr7 | 4108705  | 4109662  | 9311_chr07 | 3859853  | 3860813  | 99NN-3, 99NN-7 | match |
| Chr7 | 6042827  | 6044024  | 9311_chr07 | 5875674  | 5876869  | NN99-4, NN99-8 | match |
| Chr7 | 7178011  | 7178699  | 9311_chr07 | 6920679  | 6921365  | 99NN-3, 99NN-7 | match |
| Chr7 | 16374813 | 16376299 | 9311_chr07 | 15444918 | 15446444 | NN99-4, NN99-8 | match |
| Chr7 | 17112810 | 17113185 | 9311_chr07 | 16119189 | 16119579 | NN99-4         | match |
| Chr7 | 17128236 | 17129544 | 9311_chr07 | 16141812 | 16143120 | 99NN-3, 99NN-7 | match |
| Chr7 | 17179918 | 17180039 | 9311_chr07 | 16191719 | 16191839 | NN99-8         | match |
| Chr7 | 17376768 | 17377185 | 9311_chr07 | 16395612 | 16396024 | NN99-8         | match |
| Chr7 | 19480082 | 19481088 | 9311_chr07 | 18271054 | 18272071 | NN99-8         | match |
| Chr7 | 21658823 | 21659457 | 9311_chr07 | 20296530 | 20297163 | 99NN-3         | match |
| Chr7 | 23843198 | 23843476 | 9311_chr07 | 22453708 | 22453985 | NN99-4, NN99-8 | match |
| Chr7 | 27177326 | 27178010 | 9311_chr07 | 25754806 | 25755493 | 99NN-7         | match |
| Chr7 | 28868015 | 28868560 | 9311_chr07 | 27372995 | 27373539 | 99NN-3, 99NN-7 | match |
| Chr8 | 5644251  | 5645069  | 9311_chr08 | 5626399  | 5627210  | 99NN-7         | match |
| Chr8 | 6125024  | 6126276  | 9311_chr08 | 6245419  | 6246670  | NN99-8         | match |
| Chr8 | 8942693  | 8945911  | 9311_chr08 | 9445282  | 9448476  | 99NN-3, 99NN-7 | match |
| Chr8 | 11034025 | 11035401 | 9311_chr08 | 12250322 | 12251696 | NN99-8         | match |
| Chr8 | 19464110 | 19465251 | 9311_chr08 | 21584746 | 21585534 | NN99-4, NN99-8 | match |
| Chr8 | 20635802 | 20636924 | 9311_chr08 | 22728137 | 22729259 | 99NN-3, 99NN-7 | match |
| Chr8 | 21246798 | 21247244 | 9311_chr08 | 23338474 | 23338919 | NN99-8         | match |
| Chr8 | 21813604 | 21815060 | 9311_chr08 | 23934617 | 23936072 | 99NN-3, 99NN-7 | match |
| Chr8 | 23657122 | 23657342 | 9311_chr08 | 25990865 | 25991084 | 99NN-7         | match |
| Chr9 | 5599596  | 5600217  | 9311_chr09 | 5365432  | 5366052  | NN99-4, NN99-8 | match |
| Chr9 | 6230447  | 6230680  | 9311_chr09 | 6089856  | 6090089  | 99NN-7         | match |
| Chr9 | 7481224  | 7481910  | 9311_chr09 | 7359392  | 7360077  | 99NN-7         | match |
| Chr9 | 10805352 | 10806135 | 9311_chr09 | 10045490 | 10046272 | NN99-4, NN99-8 | match |
| Chr9 | 12143280 | 12144850 | 9311_chr09 | 11361572 | 11363141 | NN99-4         | match |
| Chr9 | 13779228 | 13779433 | 9311_chr09 | 13085281 | 13085485 | NN99-8         | match |
| Chr9 | 13911151 | 13918860 | 9311_chr09 | 13221169 | 13228876 | NN99-4         | match |
| Chr9 | 14980713 | 14981215 | 9311_chr09 | 14177249 | 14177752 | 99NN-3, 99NN-7 | match |
| Chr9 | 15021225 | 15021411 | 9311_chr09 | 14212809 | 14212994 | NN99-4, NN99-8 | match |
| Chr9 | 16422504 | 16422984 | 9311_chr09 | 15655571 | 15656038 | NN99-4         | match |
| Chr9 | 16560613 | 16561309 | 9311_chr09 | 15781313 | 15782009 | NN99-8         | match |
| Chr9 | 17694381 | 17695286 | 9311_chr09 | 16989111 | 16990015 | 99NN-3, 99NN-7 | match |
| Chr9 | 18618052 | 18619097 | 9311_chr09 | 17933762 | 17934806 | NN99-4, NN99-8 | match |

---

Table S7. Chromosome positions of 10 HE junctions in *Arabidopsis suecica* individuals (based on the position in genome of *A. thaliana*).

| Chr  | Start    | End      | Samples                            |
|------|----------|----------|------------------------------------|
| Chr1 | 658958   | 658976   | SRR2084157, SRR3123760, SRR3123765 |
| Chr1 | 732181   | 732288   | SRR2084157, SRR3123760, SRR3123765 |
| Chr1 | 2813704  | 2813752  | SRR3123767                         |
| Chr1 | 4929662  | 4929738  | SRR3123767                         |
| Chr2 | 19379436 | 19379776 | SRR3123767                         |
| Chr2 | 19564121 | 19564172 | SRR3123764, SRR3123769             |
| Chr4 | 1068487  | 1068604  | SRR3123760, SRR2084157             |
| Chr4 | 2240257  | 2240325  | SRR2084157, SRR3123760             |
| Chr4 | 2786695  | 2792022  | SRR2084157, SRR3123760             |

Table S8. Chromosome positions of 26 HE junctions in *Arachis hypogaea* individuals (based on the position in B genome of *A. hypogaea*).

| Chr. B   | Start B   | End B     | Samples                                                                                                                                |
|----------|-----------|-----------|----------------------------------------------------------------------------------------------------------------------------------------|
| Arahy.12 | 117668999 | 117704310 | Amonticola                                                                                                                             |
| Arahy.12 | 117817965 | 117822170 | NC3033, N423, N421, N464, N692, N705, N693, N689, N717, N734, N726, N725, N711, N745, N709, N713                                       |
| Arahy.12 | 118256778 | 118258164 | TR, N744, N657, N625, N683, N675, N665, N663, N431, N741, N435, N733, N704, N702, N743, N700, NM, N730, N690, N740, N723, N751         |
| Arahy.13 | 146343047 | 146347951 | All samples                                                                                                                            |
| Arahy.14 | 77162579  | 77168419  | N431, N741, N423, N421, N435                                                                                                           |
| Arahy.14 | 90393195  | 90440728  | N431, N741, N423, N421, N435                                                                                                           |
| Arahy.14 | 137403639 | 137406947 | N744, N709                                                                                                                             |
| Arahy.14 | 138862257 | 138863838 | Amonticola                                                                                                                             |
| Arahy.14 | 139404845 | 139413753 | Amonticola                                                                                                                             |
| Arahy.14 | 139899365 | 139905900 | N733, N745                                                                                                                             |
| Arahy.14 | 140466186 | 140468348 | N733                                                                                                                                   |
| Arahy.14 | 140572534 | 140582341 | N657, N700, N717, N725, N711, N745                                                                                                     |
| Arahy.14 | 140582345 | 140589736 | NC3033, N625, N683, N665, N663, N704, N702, N693, N713                                                                                 |
| Arahy.14 | 141430181 | 141442130 | NC3033, N657, N625, N683, N675, N665, N663, N704, N702, N693, N700, N717, N713                                                         |
| Arahy.15 | 6306066   | 6308629   | All samples                                                                                                                            |
| Arahy.16 | 3202449   | 3210486   | TR, N683, N689, N700, N717, N734, N690                                                                                                 |
| Arahy.16 | 146245083 | 146267448 | NC3033, N683, N665, N431, N741, N423, N692, N743, N713                                                                                 |
| Arahy.16 | 151628012 | 151636887 | NC3033                                                                                                                                 |
| Arahy.16 | 152284902 | 152286523 | TR, N713                                                                                                                               |
| Arahy.16 | 152723849 | 152730064 | Amonticola                                                                                                                             |
| Arahy.16 | 152819251 | 152836728 | TR, N657, N625, N683, N675, N665, N663, N464, N704, N705, N743, N689, N700, N734, N713, N723                                           |
| Arahy.16 | 153003860 | 153007978 | Amonticola, N744, N431, N741, N423, N421, N435, N692, N733, N702, N693, N717, NM, N726, N725, N711, N730, N745, N709, N690, N740, N751 |
| Arahy.17 | 1438055   | 1452535   | All samples                                                                                                                            |
| Arahy.17 | 1839088   | 1855636   | N733                                                                                                                                   |
| Arahy.17 | 2291088   | 2312052   | N733                                                                                                                                   |
| Arahy.18 | 1127952   | 1130739   | All samples                                                                                                                            |

Table S9. Genomic feature of HE-junction-related motifs in wheat, Brassica and rice.

A-rich motif

|          | Promoter<br>(up-stream 2kb of TSS) | UTR and intron | Exon    | Intergenic region |
|----------|------------------------------------|----------------|---------|-------------------|
| Brassica | 10 (28%)                           | 14 (40%)       | 5 (14%) | 6 (18%)           |
| Rice     | 26 (22%)                           | 24 (21%)       | 11 (9%) | 56 (49%)          |

CTT- or CT-repeat motif

|          | Promoter<br>(up-stream 2kb of TSS) | UTR and intron | Exon     | Intergenic region |
|----------|------------------------------------|----------------|----------|-------------------|
| Brassica | 13 (13%)                           | 19 (19%)       | 61 (61%) | 9 (8%)            |
| Rice     | 21 (24%)                           | 25 (28%)       | 5 (6%)   | 37 (42%)          |

CCN-repeat motif

|       | Promoter<br>(up-stream 2kb of TSS) | UTR and intron | Exon     | Intergenic region |
|-------|------------------------------------|----------------|----------|-------------------|
| Wheat | 6 (19%)                            | 4 (13%)        | 17 (55%) | 4 (13%)           |
| Rice  | 14 (18%)                           | 13 (17%)       | 18 (23%) | 32 (42%)          |
